# Supplementary material
Source: publisher site journal article supplement (https://www.spandidos-publications.com/4173/downloadSupplementary)
Supplement: Supplementary file 1 [file downloadSupplementary]

## Sheet: GSE112264_diff_logFC1_p0.05
Table SIV. Differentially expressed miRNAs in GSE112264 dataset.
gene_name	logFC	AveExpr	t	P.Value	adj.P.Val	B	UP_DOWN	GSM3063293	GSM3063294	GSM3063295	GSM3063296	GSM3063297	GSM3063298	GSM3063299	GSM3063300	GSM3063301	GSM3063302	GSM3063303	GSM3063304	GSM3063305	GSM3063306	GSM3063307	GSM3063308	GSM3063309	GSM3063310	GSM3063311	GSM3063312	GSM3063313	GSM3063314	GSM3063315	GSM3063316	GSM3063317	GSM3063318	GSM3063319	GSM3063320	GSM3063321	GSM3063322	GSM3063323	GSM3063324	GSM3063325	GSM3063326	GSM3063327	GSM3063328	GSM3063329	GSM3063330	GSM3063331	GSM3063332	GSM3063333	GSM3063334
hsa-let-7a-2-3p	1.94437	0.321433	5.39894	5.21215e-07	2.8445e-06	5.43863	UP	-1.54038	3.13184	-1.58516	5.27075	-1.67742	-1.2376	-1.55063	-1.52546	-1.67249	-1.74038	-1.30103	-1.11174	-1.57285	2.24653	-1.4164	-1.62845	-1.13091	-1.02947	-1.68431	3.44238	4.03248	-1.04535	-0.792648	1.49337	3.55618	-1.02774	-1.50421	-1.64695	-1.48952	-0.895687	-1.59003	-0.299681	-1.64229	-1.40019	-1.53441	-1.68781	-1.47576	2.41758	-0.878027	-1.39765	-1.4982	-1.2248
hsa-let-7a-5p	-2.28258	2.00794	-4.23565	5.40328e-05	0.000197709	0.951223	DOWN	1.39299	2.8933	2.47834	2.77787	3.65873	3.92504	5.30288	2.53707	3.09825	2.29651	-1.30103	4.01491	4.65205	4.76525	4.49475	4.58954	3.84295	4.27324	5.02985	2.58403	5.3172	5.0237	-0.792648	-1.55614	3.41444	4.7579	4.16947	4.36748	4.32516	-0.895687	5.65225	-0.299681	-1.64229	-1.40019	-1.72575	-0.72722	5.91648	6.19291	4.77362	5.42101	4.56605	4.72855
hsa-let-7b-3p	2.82602	1.64547	7.65598	1.86823e-11	2.08348e-10	15.491	UP	-0.634209	2.41758	2.13904	-1.57134	2.29651	-1.2376	-1.55063	1.99477	0.287703	-1.74038	-1.30103	-1.11174	1.48091	-1.64433	-1.4164	4.52151	-1.13091	-1.02947	-0.879385	4.29757	3.30163	-1.04535	4.4536	3.23526	3.69567	-1.02774	-1.50421	3.82077	-1.48952	-0.895687	4.15952	-0.299681	-1.64229	-1.40019	2.1637	-1.68781	-1.47576	0.674571	-0.878027	2.46643	-1.4982	-1.2248
hsa-let-7b-5p	-1.85862	1.77029	-3.81429	0.000247158	0.000791462	-0.498015	DOWN	2.65293	2.41395	0.908879	2.10562	4.24392	-1.2376	4.67213	4.47346	4.27735	-0.014	-1.30103	5.02985	5.05182	3.50847	5.29646	4.6246	2.94416	-1.02947	0.933033	3.11787	4.59748	3.61645	-0.792648	-1.55614	-0.862626	4.72469	1.92615	4.64818	5.61329	-0.895687	5.12412	-0.299681	4.44701	-1.40019	-1.4352	-1.68781	5.57251	5.62254	4.04895	6.14173	1.2728	-1.2248
hsa-let-7c-3p	1.34008	0.187016	3.34839	0.00117962	0.00322917	-1.96983	UP	-0.349319	-1.61738	2.07667	-1.57134	-0.234308	-1.2376	-1.55063	1.43987	0.417297	-1.74038	-1.30103	-1.11174	-1.57285	0.890286	-1.4164	-1.62845	-1.13091	-1.02947	3.8011	-1.66996	-1.35138	4.40821	-0.792648	-1.55614	3.96113	-1.02774	-1.50421	2.15948	-1.48952	-0.895687	2.40924	-0.299681	-1.64229	-1.40019	-1.72575	0.23044	-1.47576	-1.5912	-0.878027	-1.39765	-1.4982	-1.2248
hsa-let-7c-5p	-1.86795	1.53247	-3.81004	0.000250849	0.00080228	-0.512071	DOWN	3.50184	-1.61738	2.97137	5.12604	4.67824	5.49879	4.58954	5.46637	5.49879	-0.641681	-1.30103	4.32125	5.06815	4.08657	3.69771	1.525	4.18721	2.92004	3.77166	4.67213	-1.35138	4.5679	-0.792648	1.34189	-0.862626	3.73622	2.2767	-0.251341	4.15327	-0.895687	2.81453	-0.299681	-1.64229	5.68357	-0.709725	-1.68781	6.18622	6.51142	4.01081	4.22433	-1.4982	-1.2248
hsa-let-7d-3p	2.26136	0.623849	6.45882	4.93411e-09	3.89415e-08	9.99821	UP	3.61108	-1.61738	1.24084	0.825489	3.2886	-1.2376	-1.55063	-1.52546	-0.724857	-0.886055	-1.30103	-1.11174	0.56533	1.43987	-1.4164	-0.188736	-1.13091	-1.02947	-1.68431	3.62518	-1.35138	-1.04535	-0.792648	-1.55614	-0.862626	-1.02774	1.23001	-0.410275	-1.48952	-0.895687	0.503967	-0.299681	-1.64229	-1.40019	-0.156478	-1.68781	-1.47576	0.582495	-0.878027	-1.39765	-1.4982	-1.2248
hsa-let-7e-5p	-1.81957	0.687132	-4.10691	8.68591e-05	0.00030644	0.49726	DOWN	1.31213	2.64662	-1.58516	2.94416	3.15233	5.07916	2.29909	3.03221	3.94973	-1.74038	4.31302	4.62931	0.815489	1.59596	4.61148	-1.62845	-1.13091	-1.02947	0.367923	3.02726	-1.35138	-1.04535	-0.792648	-1.55614	-0.862626	3.27034	3.03425	4.053	5.35273	-0.895687	-1.59003	-0.299681	0.00376923	4.42716	-0.805797	0.267615	4.77593	2.02826	-0.878027	4.39029	-1.4982	3.8232
hsa-let-7f-1-3p	1.78286	1.15076	4.30159	4.22302e-05	0.000159295	1.18739	UP	-0.892841	3.55618	1.50314	4.17144	2.96846	4.9073	-1.55063	-1.52546	3.59754	-1.53	-1.30103	-1.11174	0.529099	1.48918	2.38996	3.39475	-1.13091	-1.02947	2.89996	-1.66996	-1.35138	-1.04535	-0.792648	0.764319	-0.862626	-1.02774	-1.50421	-0.246516	-1.48952	4.07065	2.27919	-0.299681	-1.64229	-1.40019	3.91457	2.63524	-1.47576	-1.5912	-0.878027	-1.39765	-1.4982	-1.2248
hsa-let-7f-5p	-1.08624	0.402531	-2.22801	0.0283199	0.0511554	-4.85882	DOWN	-1.58108	-1.61738	-1.58516	-1.57134	3.67199	2.57271	3.72325	-1.52546	-0.120967	-0.99689	2.63286	4.31302	2.98173	0.143978	4.58333	3.78465	-1.13091	3.67007	3.89673	2.74065	-1.35138	-1.04535	-0.792648	-1.55614	-0.862626	-1.02774	-1.50421	-1.64695	-1.48952	-0.895687	1.32473	5.67738	-1.64229	-1.40019	-0.623967	1.83974	4.37545	1.83238	-0.878027	4.94344	-1.4982	-1.2248
hsa-miR-100-3p	-1.0959	-0.502867	-3.04526	0.00303311	0.00746467	-2.84678	DOWN	-0.672681	2.60512	-1.58516	-1.57134	-1.67742	4.26533	-1.55063	-1.52546	-1.67249	1.39882	-1.30103	-1.11174	1.87164	1.14052	-1.4164	4.57938	-1.13091	-1.02947	-1.68431	1.24681	2.80746	-1.04535	5.26743	-1.55614	3.66501	-1.02774	-1.50421	-1.64695	-1.48952	-0.895687	-1.59003	4.59308	-1.64229	-1.40019	-0.0918462	0.145632	1.89469	-1.5912	-0.878027	3.27386	2.73627	4.16947
hsa-miR-100-5p	-1.99056	0.870916	-4.28673	4.46506e-05	0.000167931	1.13395	DOWN	1.48706	2.22982	-1.58516	-1.57134	0.845703	4.51676	5.56684	3.56796	3.40886	2.03552	-1.30103	-1.11174	4.55407	-0.344143	2.92725	2.76771	-1.13091	-1.02947	4.9073	3.93314	-1.35138	-1.04535	4.21205	-1.55614	-0.862626	4.5679	3.94973	4.00323	5.14538	-0.895687	-1.59003	5.28542	-1.64229	4.11515	0.74067	-1.12565	5.46374	5.3218	4.6141	3.10451	-1.4982	2.95704
hsa-miR-103a-3p	-4.75367	2.70311	-11.9176	2.39245e-20	8.40636e-19	35.7836	DOWN	6.06074	3.13998	4.16947	3.40677	6.5203	-1.2376	4.5814	6.2501	6.99204	2.4051	5.60142	5.39673	7.68901	6.11895	5.76473	5.91648	-1.13091	4.36964	6.89941	6.44729	6.13509	4.18352	5.50154	0.812615	-0.862626	5.21668	5.40418	6.17856	2.9121	3.96655	7.14311	5.99582	4.52853	5.73054	2.56184	3.93517	7.09342	6.88926	6.2422	7.09342	5.72797	4.00668
hsa-miR-106a-3p	-1.02368	1.18813	-2.04784	0.0434292	0.0743167	-5.22795	DOWN	-0.864071	2.13904	4.38655	1.68531	1.57883	3.5724	4.12252	-1.52546	3.97583	-1.74038	2.73163	-1.11174	2.03073	-1.64433	4.31516	3.68813	-1.13091	3.721	-1.68431	-1.66996	-1.35138	-1.04535	-0.792648	4.90988	4.60699	-1.02774	1.58197	4.30556	4.14525	3.57992	2.53707	4.85412	5.07692	-1.40019	-1.72575	2.96554	1.48495	0.794615	3.37599	3.41444	4.50987	5.21185
hsa-miR-106a-5p	-1.74698	-0.107632	-4.35036	3.51443e-05	0.000135353	1.36359	DOWN	4.57232	1.87164	1.09566	1.82996	1.76774	-1.2376	4.7208	4.71235	-1.67249	0.312901	3.62726	-1.11174	1.82436	2.62788	-1.4164	-1.62845	-1.13091	-1.02947	2.8786	-0.00234615	2.64662	-1.04535	-0.792648	4.00875	-0.862626	4.30556	-1.50421	-1.64695	1.96738	-0.895687	-1.59003	-0.299681	-1.64229	5.66751	-1.72575	-1.68781	-1.47576	1.59397	6.46538	3.08132	-1.4982	-1.2248
hsa-miR-107	-3.65741	2.34067	-7.23959	1.3353e-10	1.32754e-09	13.5505	DOWN	5.73312	4.22231	1.74834	1.33604	6.70667	6.60634	4.93041	5.21185	6.83223	-1.18332	4.18536	5.11037	7.36533	6.40753	3.02726	0.992874	-1.13091	4.69038	7.37975	6.34908	4.78377	5.44056	4.73251	-1.55614	-0.862626	-1.02774	4.49475	6.04465	-1.48952	-0.895687	6.5203	-0.299681	4.01491	4.69985	0.895473	3.41834	6.71673	6.20529	6.44729	6.7496	4.20456	4.37156
hsa-miR-10b-5p	-1.96833	0.636292	-4.44587	2.44416e-05	9.70476e-05	1.71246	DOWN	3.33179	2.53707	2.86084	2.22982	-1.67742	-1.2376	3.59038	-1.52546	2.40717	-0.612275	-1.30103	-1.11174	2.47623	4.57736	4.85412	2.50442	-1.13091	3.68047	5.22546	1.26745	-1.35138	-1.04535	5.12412	4.59748	-0.862626	4.26109	4.99331	-1.64695	4.51676	-0.895687	2.99526	-0.299681	-1.64229	1.76612	-1.55835	3.19436	3.55074	5.14538	5.02788	2.36133	-1.4982	-1.2248
hsa-miR-1182	2.12349	2.07672	5.16997	1.35932e-06	6.82321e-06	4.50614	UP	3.54579	1.525	2.92525	4.69587	2.85211	3.51096	4.82623	-1.52546	1.05151	0.960879	4.31302	-1.11174	4.06097	-1.64433	3.71875	-1.62845	-1.13091	-1.02947	0.518264	-0.390077	-1.35138	-1.04535	-0.792648	-1.55614	-0.862626	-1.02774	5.21185	0.214758	4.71436	3.81377	-1.59003	-0.299681	0.903571	-1.40019	-0.263176	3.62309	1.37555	4.30164	-0.878027	2.74065	-1.4982	2.3339
hsa-miR-1184	1.14365	0.305954	3.17434	0.00204362	0.00526823	-2.48149	UP	-1.67152	0.799462	-1.58516	-1.57134	2.79251	-1.2376	1.41426	-1.52546	-1.67249	2.04778	3.17466	-1.11174	1.68984	-1.64433	-1.4164	-1.62845	-1.13091	3.95934	2.44188	-0.00234615	2.53707	-1.04535	-0.792648	-1.55614	-0.862626	-1.02774	-1.50421	1.97094	4.39029	-0.895687	-1.59003	-0.299681	-1.64229	3.15579	-1.23676	-1.68781	-1.47576	1.82044	-0.878027	-1.39765	-1.4982	-1.2248
hsa-miR-1199-3p	2.47143	2.58375	5.81858	8.57502e-08	5.32565e-07	7.19991	UP	2.11035	4.07434	2.27046	-1.57134	2.98173	-1.2376	2.3339	-1.52546	-0.658176	2.73846	4.89671	-1.11174	1.34189	-0.554659	4.49922	-0.129797	-1.13091	4.5591	-0.943396	-0.326934	-1.35138	5.51466	3.98303	-1.55614	-0.862626	5.4186	2.5642	1.98257	-1.48952	-0.895687	-1.59003	-0.299681	-1.64229	4.61148	-1.24188	4.36103	3.50599	4.22029	4.31731	2.02826	-1.4982	4.15952
hsa-miR-1200	1.36253	0.98184	3.26869	0.00152078	0.00405488	-2.2068	UP	-0.854121	3.50847	-1.58516	-1.57134	2.18005	2.25984	3.18133	3.04634	-1.67249	-0.417253	3.19902	-1.11174	-1.57285	-0.246516	-1.4164	-1.62845	-1.13091	-1.02947	0.107275	-1.66996	-1.35138	3.7693	-0.792648	2.10562	-0.862626	-1.02774	2.63037	1.24444	-1.48952	-0.895687	4.55234	-0.299681	-1.64229	-1.40019	0.318516	3.3259	3.17466	2.57271	-0.878027	-1.39765	-1.4982	-1.2248
hsa-miR-1203	3.13641	5.4465	12.0483	1.29297e-20	4.87715e-19	36.3943	UP	5.39167	4.82981	3.60184	3.88879	5.23948	4.1634	7.73944	5.06629	4.24053	4.79463	5.02579	6.07618	5.25267	4.02559	4.69587	4.31108	4.87295	4.88078	3.93115	5.4112	2.30403	4.85218	3.61462	4.83758	4.52625	3.92915	4.95114	0.560143	2.04287	-0.895687	3.41165	4.4536	3.08132	3.89673	4.40106	4.94763	4.96174	0.582495	4.54232	4.82981	5.09605	3.41165
hsa-miR-1204	2.56175	0.612657	7.67891	1.67537e-11	1.87656e-10	15.5986	UP	-1.26404	-1.61738	-1.58516	1.96738	-1.67742	2.6121	-1.55063	-1.52546	-0.398962	-1.74038	-1.30103	3.77377	-1.57285	2.05687	-1.4164	0.815489	-1.13091	-1.02947	2.85211	-1.66996	-1.35138	-1.04535	-0.792648	-1.55614	-0.862626	-1.02774	-1.50421	-1.64695	-1.48952	-0.895687	-1.59003	-0.299681	-1.64229	-1.40019	-1.72575	0.0519286	-1.47576	-1.5912	3.74453	-1.39765	-1.4982	-1.2248
hsa-miR-1207-3p	2.5182	0.983701	6.45026	5.12981e-09	4.02384e-08	9.96001	UP	-1.34568	-1.61738	0.953407	-1.57134	1.26198	2.555	0.704467	3.3567	0.370538	-1.74038	-1.30103	-1.11174	-1.57285	4.39456	-1.4164	-1.62845	-1.13091	-1.02947	-1.68431	-1.66996	-1.35138	-1.04535	-0.792648	-1.55614	-0.862626	-1.02774	-1.50421	-1.64695	-1.48952	-0.895687	1.4187	-0.299681	3.15233	3.54051	0.0424615	4.22813	-1.47576	-1.5912	-0.878027	-1.39765	-1.4982	-1.2248
hsa-miR-1208	1.13638	-0.283801	2.9003	0.00466366	0.010806	-3.24217	UP	-0.917824	-1.61738	3.27034	-1.57134	2.8402	-1.2376	-1.55063	-1.52546	0.880984	-1.43378	-1.30103	-1.11174	-1.57285	-1.64433	-1.4164	-1.62845	-1.13091	-1.02947	-1.68431	-1.66996	-1.35138	-1.04535	-0.792648	-1.55614	-0.862626	-1.02774	-1.50421	-1.64695	-1.48952	-0.895687	-1.59003	-0.299681	4.353	-1.40019	-0.529462	-0.526824	-1.47576	-1.5912	-0.878027	-1.39765	-1.4982	-1.2248
hsa-miR-122-5p	-2.18639	2.95314	-4.06087	0.000102712	0.000357959	0.337239	DOWN	6.72852	1.52004	5.55147	4.94142	6.69642	2.92004	4.9579	6.40753	8.73948	4.72469	-1.30103	5.18959	5.21921	0.252978	6.83223	4.88556	6.16264	-1.02947	6.83223	5.24621	7.31996	-1.04535	-0.792648	-1.55614	-0.862626	4.32516	4.25235	7.46724	3.75095	3.28607	2.90998	-0.299681	2.3339	4.34136	1.66168	4.93041	5.05926	6.14173	6.29226	5.1842	3.20803	2.71102
hsa-miR-1224-3p	1.01678	5.04549	3.86726	0.00020525	0.000667256	-0.321711	UP	5.01963	5.50931	5.69608	4.71235	5.45838	3.85204	5.69012	6.28467	4.2481	-0.422604	3.39207	5.42101	5.15884	5.45336	4.53457	1.03496	4.83977	5.64011	3.15006	2.22803	3.66501	4.15732	-0.792648	4.21405	5.52529	5.75765	4.98727	5.14538	5.28078	3.93314	5.68357	-0.299681	5.58468	5.14043	5.79335	5.4162	4.88753	4.82623	6.49751	5.47125	5.30085	5.23505
hsa-miR-1225-5p	1.2438	6.87742	6.92321	5.84656e-10	5.31788e-09	12.0956	UP	6.67492	7.89342	5.75765	6.47399	7.93879	3.41834	6.19291	6.58638	5.35273	4.37348	5.43067	5.89443	6.06074	4.89462	6.44729	5.79621	5.73616	6.46538	6.28467	4.50135	6.0678	4.5506	8.42824	7.56092	6.40753	6.14173	5.92464	6.27774	5.89963	4.69426	5.47725	4.95114	6.47399	7.73944	6.74449	6.92143	7.34266	7.04703	5.64678	7.21278	6.27774	6.47399
hsa-miR-1226-3p	1.34946	2.49553	3.32712	0.00126288	0.00343144	-2.03352	UP	3.70001	3.80714	2.08056	3.26786	2.555	3.97343	4.2933	-1.52546	-1.67249	2.40924	4.54441	5.02166	-1.57285	0.220374	1.62809	3.86333	3.34831	-1.02947	1.14784	5.7392	2.0332	5.91648	-0.792648	1.55464	-0.862626	2.77787	-1.50421	-1.64695	-1.48952	-0.895687	3.65096	-0.299681	0.589885	4.7713	4.11024	3.68813	4.00169	-1.5912	4.44907	-1.39765	2.95459	-1.2248
hsa-miR-1226-5p	-1.80529	1.61344	-4.1106	8.56947e-05	0.000302764	0.51015	DOWN	3.34268	3.70569	2.7889	4.77593	3.51548	3.46258	-1.55063	2.5316	2.15948	4.08657	-1.30103	4.17942	3.98303	4.67413	5.04095	2.83188	3.42758	3.59531	3.76453	1.71555	-1.35138	-1.04535	-0.792648	-1.55614	-0.862626	3.96456	5.02985	1.91809	4.72275	-0.895687	3.51322	-0.299681	1.61736	-1.40019	4.68812	3.88879	1.95035	4.13895	3.74856	5.4611	4.33711	3.02726
hsa-miR-1228-5p	1.53237	11.2014	19.1845	6.73046e-34	2.46623e-31	66.6758	UP	10.8158	10.7434	9.96364	10.4861	10.7779	10.4497	10.0864	10.4497	10.419	9.92015	10.4497	10.5228	10.2552	10.124	10.2119	10.4343	10.5228	10.6306	10.1715	10.8158	10.5228	10.2119	10.852	10.8158	10.7779	10.2119	9.88389	10.2934	10.4861	10.2119	10.7023	11.1624	10.8929	10.7023	10.8158	10.852	10.4497	10.6687	9.81192	10.2552	10.3752	10.8929
hsa-miR-1229-3p	1.20028	4.797	4.75046	7.45621e-06	3.26368e-05	2.85684	UP	4.6246	4.99974	4.96582	3.06265	3.83486	4.78769	1.09566	3.10224	4.68812	5.32587	4.91247	4.87073	4.54048	2.61026	4.28593	5.34608	3.98714	5.31315	4.27121	6.2501	3.09469	-1.04535	-0.792648	5.43067	5.4454	5.07916	3.91457	3.95562	5.22546	-0.895687	5.16924	4.60699	4.61148	4.34504	5.4454	3.94355	4.24053	4.5679	5.30804	5.04095	4.06599	5.48835
hsa-miR-1231	1.30688	6.5796	8.50471	3.20289e-13	4.6154e-12	19.5107	UP	7.12586	6.5462	7.06499	5.63699	6.41637	6.42208	4.59308	6.47399	7.03478	6.68604	6.23286	7.68901	6.53024	3.42507	6.33999	6.19291	6.68604	7.08805	5.77445	6.32925	6.20085	6.50222	7.54841	6.60634	6.53796	6.0524	5.06179	5.55147	5.42101	5.37146	5.00664	6.43033	5.08698	5.75765	5.72135	5.12796	5.60716	5.11516	5.49879	5.57881	5.60142	5.37645
hsa-miR-1233-5p	-1.4312	11.5434	-12.6174	9.04512e-22	4.54302e-20	39.0341	DOWN	11.5144	11.9596	12.3117	13.1891	11.9596	11.5144	11.8963	11.6541	12.3666	12.055	11.6541	11.4032	11.7688	11.6541	12.0097	12.145	11.7688	11.4553	11.7688	12.0952	12.8936	11.4553	11.2585	11.5659	12.991	12.3117	13.0478	13.1891	12.7487	12.251	11.8297	11.928	12.6001	12.145	13.2735	13.1133	12.7074	12.055	12.2004	12.4294	13.5022	13.6352
hsa-miR-1236-3p	1.46806	3.82506	4.10655	8.6974e-05	0.00030644	0.495997	UP	3.71041	3.67823	5.10032	2.09735	2.03784	2.33874	-1.55063	4.30164	4.53865	4.65402	-1.30103	5.79908	4.40391	-1.64433	1.65575	2.11252	4.26919	4.94142	-0.480044	2.5269	4.9768	4.92842	4.72855	5.56173	5.64011	3.59038	-1.50421	0.162071	2.32863	3.66092	4.17942	-0.299681	4.65402	3.62309	4.11905	4.28789	4.02768	-1.5912	3.76212	2.05964	4.41357	4.23237
hsa-miR-1236-5p	1.86713	4.25962	4.41955	2.70264e-05	0.000106979	1.61583	UP	4.99331	3.9372	4.78996	5.33051	4.84196	-1.2376	3.11787	3.44726	2.05274	4.5814	5.59284	4.91949	3.8836	-1.64433	2.50696	4.07065	4.65824	5.43313	-1.68431	-1.66996	4.68036	5.34827	-0.792648	5.07468	5.71452	6.37297	3.20988	4.61865	4.61673	-0.895687	3.72325	6.40753	4.83758	5.76473	1.78252	4.58333	4.25892	-1.5912	-0.878027	1.93035	5.4264	3.80931
hsa-miR-1237-3p	1.38381	4.95583	4.89521	4.17915e-06	1.91762e-05	3.4168	UP	5.3106	5.07916	4.08438	3.48024	4.46007	6.32162	3.05152	3.34549	0.35156	5.61329	3.62726	6.08343	4.95344	3.97098	3.62518	2.35653	2.81063	5.14043	5.67074	4.60247	5.98073	4.27324	4.39456	5.8372	5.99582	-1.02774	3.83907	4.82802	4.79222	4.2812	5.5196	4.94344	5.65827	4.82623	5.61821	5.97295	5.4112	3.8862	3.24649	-1.39765	5.11943	3.68047
hsa-miR-1238-3p	1.93853	4.22108	5.40038	5.18059e-07	2.83331e-06	5.44454	UP	3.8836	4.67612	4.64236	2.73395	4.82981	4.97241	3.6039	4.14305	1.93984	3.60755	-1.30103	5.11516	4.8479	0.531901	4.58333	0.671527	-1.13091	-1.02947	5.06179	-0.0965934	4.09587	-1.04535	5.07002	2.13326	-0.862626	5.32384	5.37146	4.24053	5.45105	-0.895687	5.12796	-0.299681	2.00532	5.19915	5.3172	5.26909	4.7452	4.42716	3.98714	4.24053	3.1657	4.53081
hsa-miR-1238-5p	-1.05005	6.97195	-10.724	7.03518e-18	1.86033e-16	30.1428	DOWN	6.92744	7.02346	7.23842	8.01125	7.17757	7.75451	7.95247	7.68188	7.68901	7.3918	7.58608	6.87915	7.1661	7.86601	8.01125	7.36533	7.3918	7.21907	7.9979	7.40465	7.49043	6.92744	5.96637	6.63545	7.12032	7.8257	7.86601	7.86601	8.02582	7.23842	7.50175	7.03478	6.69642	6.99204	7.89342	7.93879	7.89342	7.90146	7.50175	8.02582	7.98524	8.3153
hsa-miR-124-3p	-4.80015	3.12538	-16.5016	3.16505e-29	4.7755e-27	56.0506	DOWN	4.92842	5.39167	5.27075	5.99958	4.98921	5.73312	5.76473	5.64952	5.44056	4.82623	6.29226	4.70812	5.70221	4.7713	6.17856	6.63545	5.48179	5.74471	5.26743	1.87667	3.88879	3.69363	5.75434	5.17397	4.96822	6.43033	6.0678	6.0678	5.73312	5.26909	4.47346	4.42279	3.61285	5.22546	5.73312	5.76473	5.47725	5.22546	6.33999	5.43067	5.19348	5.72797
hsa-miR-1245a	-2.12769	0.00911557	-5.37982	5.65074e-07	3.07079e-06	5.35995	DOWN	-0.114846	0.250549	-1.58516	3.95755	-1.1182	5.58468	2.34397	2.41159	3.16182	1.17199	3.62726	-1.11174	0.806187	-1.64433	-1.4164	3.56125	-1.13091	3.16182	-1.68431	-1.66996	-1.35138	3.54579	3.91457	-1.55614	-0.862626	-1.02774	4.7208	-0.288165	-1.48952	-0.895687	2.18501	5.73312	-1.64229	2.71721	-1.55242	1.69945	-1.47576	3.48024	3.88879	3.33615	-1.4982	3.04167
hsa-miR-1245b-3p	-1.19974	-0.766098	-3.5415	0.000627026	0.00182764	-1.37736	DOWN	-1.07747	-1.61738	2.89663	5.76473	2.59251	-1.2376	-1.55063	-1.52546	-1.67249	-1.74038	-1.30103	-1.11174	2.45353	2.05274	-1.4164	-1.62845	-1.13091	5.03182	0.183571	-1.66996	-1.35138	-1.04535	-0.792648	-1.55614	-0.862626	-1.02774	-1.50421	-1.64695	-1.48952	-0.895687	0.365308	-0.299681	-0.491275	-1.40019	-1.563	1.35786	-1.47576	-1.5912	-0.878027	4.43327	-1.4982	-1.2248
hsa-miR-1246	-8.25735	6.05532	-19.0189	1.27412e-33	3.26812e-31	66.0467	DOWN	9.42808	9.77368	8.36458	9.73687	10.6306	10.3124	8.8637	10.5571	9.77368	10.124	8.39767	8.79879	10.2119	9.33621	11.4553	9.47933	8.46324	6.72852	10.0433	9.53385	10.1715	9.14214	9.45357	9.23212	9.00771	9.05529	11.0266	11.7069	9.92015	7.58608	10.5571	8.02582	9.62142	10.8158	11.0266	9.25742	11.6117	11.0816	9.25742	11.8297	11.1223	10.124
hsa-miR-1249-5p	1.40643	7.28104	8.52399	2.91852e-13	4.22939e-12	19.6027	UP	6.99204	6.07618	8.05433	6.08343	7.02346	5.26281	7.50175	6.68604	6.93345	8.09745	7.31996	8.48088	7.46724	7.46724	6.41637	6.65519	7.50175	6.68604	5.27075	3.62518	7.29533	6.51142	5.36714	6.39796	8.02582	4.86852	5.19154	5.72797	5.87819	6.73938	5.95279	6.93345	7.45669	6.89941	6.83223	7.03478	7.44288	6.45619	6.27005	5.71452	6.89941	7.37975
hsa-miR-1250-3p	2.83708	1.71731	7.01371	3.83894e-10	3.60691e-09	12.5099	UP	2.26218	2.46383	4.25235	-1.57134	-1.67742	-1.2376	1.16557	-1.52546	0.197341	2.66055	-1.30103	-1.11174	-1.57285	1.29599	-1.4164	2.32436	-1.13091	-1.02947	-1.68431	3.87738	-1.35138	-1.04535	-0.792648	3.14779	-0.862626	-1.02774	-1.50421	-0.586066	4.42498	3.2562	2.0332	4.9073	4.66341	2.82491	3.71041	0.365308	-1.47576	-1.5912	-0.878027	-1.39765	2.95949	-1.2248
hsa-miR-1251-3p	1.13987	-0.208447	3.54483	0.000620102	0.00181186	-1.36691	UP	-1.66732	1.86221	1.47052	-1.57134	-1.01025	-1.2376	-1.55063	-1.52546	-1.67249	0.941725	-1.30103	-1.11174	-1.57285	-1.64433	-1.4164	2.31609	-1.13091	-1.02947	-1.68431	4.98921	-1.35138	-1.04535	-0.792648	-1.55614	-0.862626	-1.02774	-1.50421	-1.64695	3.52986	-0.895687	-1.59003	-0.299681	-0.010956	-1.40019	-0.427714	-1.68781	1.75577	-1.5912	-0.878027	-1.39765	-1.4982	-1.2248
hsa-miR-1256	-1.04522	0.237229	-2.40577	0.0181407	0.0349594	-4.46738	DOWN	-0.344143	-1.61738	3.97583	-1.57134	0.799462	5.5043	-1.55063	-1.52546	2.98839	-0.0918462	-1.30103	4.44907	3.96854	-1.64433	-1.4164	0.833198	-1.13091	4.07673	4.32516	1.67015	-1.35138	-1.04535	-0.792648	3.12784	5.21185	3.95755	-1.50421	-0.21022	-1.48952	4.96174	-1.59003	4.48696	-1.64229	2.69941	-1.72575	1.29235	-1.47576	-1.5912	-0.878027	-1.39765	4.58954	-1.2248
hsa-miR-125a-3p	4.90189	4.37682	11.4178	2.55157e-19	7.88528e-18	33.4344	UP	3.54051	4.97241	2.0332	1.46698	4.59528	4.00015	3.65873	1.89271	4.59308	-1.74038	-1.30103	-1.11174	4.81346	3.95755	3.89673	-1.62845	-1.13091	-1.02947	5.21185	2.92525	-1.35138	-1.04535	-0.792648	4.22029	4.02559	-1.02774	1.22442	4.49922	-1.48952	-0.895687	0.668484	-0.299681	1.8567	3.0674	1.43631	4.23842	2.00532	0.953407	3.86085	4.23025	3.33615	4.83376
hsa-miR-125a-5p	1.4957	1.76407	3.64575	0.000441589	0.00133256	-1.04703	UP	-1.45114	-1.61738	-1.58516	1.12945	5.05674	-1.2376	4.25235	-1.52546	0.752593	-1.74038	-1.30103	3.36188	2.1264	0.531901	4.18932	4.10271	-1.13091	3.69363	1.95322	2.63286	-1.35138	3.90121	-0.792648	-1.55614	-0.862626	-1.02774	1.93727	1.83974	3.69771	3.99804	-1.59003	-0.299681	-1.64229	-1.40019	0.63728	0.630736	1.69945	1.24918	4.37741	-1.39765	2.42502	3.60184
hsa-miR-125b-1-3p	4.88083	1.74057	10.5233	1.84713e-17	4.73789e-16	29.185	UP	4.46007	-1.61738	0.510319	-1.57134	-1.67742	-1.2376	-1.55063	-1.52546	4.50135	-1.74038	-1.30103	-1.11174	-1.57285	-1.64433	-1.4164	1.75786	-1.13091	3.24926	0.616505	-1.66996	-1.35138	-1.04535	-0.792648	1.96738	-0.862626	-1.02774	-1.50421	-1.64695	-1.48952	3.72769	-1.59003	-0.299681	-1.64229	-1.40019	-0.292407	-1.68781	-1.47576	-1.5912	-0.878027	-1.39765	-1.4982	-1.2248
hsa-miR-125b-5p	1.07329	1.14413	2.6866	0.00856686	0.0182964	-3.7956	UP	1.32708	2.82491	2.50696	4.22433	2.96846	2.4051	-1.55063	3.67199	-1.67249	3.81834	-1.30103	3.09469	-1.57285	1.53476	-1.4164	-1.62845	-1.13091	-1.02947	0.750126	4.17144	4.86626	3.09211	-0.792648	-1.55614	-0.862626	-1.02774	-1.50421	-1.64695	1.54892	-0.895687	1.75144	-0.299681	2.1264	3.69771	-0.0387527	2.5642	-1.47576	0.853209	-0.878027	-1.39765	-1.4982	-1.2248
hsa-miR-126-3p	-1.4036	0.793314	-2.84403	0.0054903	0.0124295	-3.39135	DOWN	3.50599	-1.61738	2.44946	-1.57134	3.19902	5.33715	-1.55063	4.69265	4.68454	2.01438	4.24392	-1.11174	-1.57285	-1.64433	2.32863	-1.62845	-1.13091	-1.02947	5.36714	6.36559	3.61462	2.85211	-0.792648	5.14538	-0.862626	-1.02774	-1.50421	4.79463	1.37019	-0.895687	4.50727	-0.299681	-1.64229	-1.40019	-0.709725	-1.68781	4.20836	3.65654	5.11516	4.81153	2.37551	-1.2248
hsa-miR-1260b	-1.73424	8.8044	-12.2454	5.12847e-21	2.1304e-19	37.3121	DOWN	9.1904	9.09969	9.77368	9.62142	9.23212	9.64725	10.0433	9.31216	9.59044	9.14214	9.31216	9.16725	9.28653	8.88636	9.53385	9.16725	9.7082	10.0433	10.6306	10.2934	9.7082	10.7023	8.82188	9.32419	9.42808	9.77368	9.45357	10.124	9.75527	10.419	10.4497	9.42808	9.16725	9.29935	8.99441	9.07915	9.14214	9.81192	10.2552	9.59044	10.4861	9.28653
hsa-miR-1263	-1.38388	-0.598485	-4.25548	5.01853e-05	0.000184685	1.02197	DOWN	-1.68135	-1.61738	-1.58516	-1.57134	-1.67742	2.52165	1.77833	2.95053	-0.960868	3.13454	-1.30103	-1.11174	1.07626	4.22813	-1.4164	0.560143	-1.13091	-1.02947	-1.68431	-1.66996	-1.35138	4.07434	-0.792648	1.83481	-0.862626	-1.02774	4.72855	-1.64695	2.18501	-0.895687	1.84452	-0.299681	-0.129797	-1.40019	-1.72575	-1.11174	1.7072	-1.5912	-0.878027	3.94568	-1.4982	-1.2248
hsa-miR-1266-3p	2.81218	1.29635	7.3856	6.71815e-11	7.0049e-10	14.2279	UP	-1.74038	-1.61738	-1.58516	2.88124	1.22721	-1.2376	1.95803	-1.52546	2.51805	-0.612275	-1.30103	-1.11174	-1.57285	1.17603	2.16939	-1.62845	-1.13091	2.79604	-1.68431	-1.66996	-1.35138	-1.04535	-0.792648	2.65031	-0.862626	-1.02774	-1.50421	0.410286	-1.48952	4.20456	-1.59003	-0.299681	0.989956	-1.40019	-1.48181	0.117044	-1.47576	-1.5912	-0.878027	-1.39765	-1.4982	-1.2248
hsa-miR-1266-5p	2.47569	0.540351	6.9551	5.04191e-10	4.66877e-09	12.2414	UP	-0.0965934	-1.61738	-1.58516	-1.57134	-1.67742	-1.2376	-1.55063	-1.52546	-1.67249	-1.74038	-1.30103	-1.11174	2.40924	-1.64433	-1.4164	0.145632	-1.13091	-1.02947	1.43053	-1.66996	-1.35138	2.74065	3.68271	-1.55614	3.95755	-1.02774	1.45715	-1.64695	-1.48952	-0.895687	-1.59003	-0.299681	-1.64229	-1.40019	-1.72575	-1.37543	-1.47576	-1.5912	-0.878027	-1.39765	-1.4982	-1.2248
hsa-miR-1267	2.18228	0.574583	6.00941	3.70481e-08	2.48765e-07	8.02107	UP	-1.44943	3.06034	1.00089	-1.57134	-1.67742	-1.2376	-1.55063	-1.52546	3.42256	3.08953	-1.30103	-1.11174	-1.57285	-1.64433	-1.4164	-1.62845	-1.13091	-1.02947	-1.68431	1.3183	-1.35138	-1.04535	-0.792648	1.62548	4.38178	-1.02774	-1.50421	2.10057	-1.48952	-0.895687	-1.59003	-0.299681	-1.64229	-1.40019	0.166154	3.89897	-1.47576	-1.5912	-0.878027	2.75584	4.31516	-1.2248
hsa-miR-1268a	1.03875	10.7049	12.8604	2.93289e-22	1.6354e-20	40.1517	UP	10.6687	10.4861	9.67509	10.0013	10.4497	9.92015	9.96364	10.419	10.6306	9.53385	10.3314	10.0864	9.7082	9.73687	9.92015	10.0433	10.3752	10.5955	9.96364	10.4861	10.6687	10.0864	10.419	10.6687	10.7023	10.3314	10.2119	10.0864	9.81192	10.5955	10.419	10.7023	10.3314	10.124	10.1715	10.3752	9.77368	10.419	10.5571	9.96364	10.124	10.0433
hsa-miR-1268b	1.07718	9.534	14.1093	9.9791e-25	9.16394e-23	45.7894	UP	9.16725	9.40156	8.91338	9.00771	9.16725	8.84558	8.9811	9.09969	9.31216	8.88636	9.02022	8.93752	8.93752	8.74826	9.16725	8.75704	9.14214	9.28653	8.73948	9.35637	9.51951	9.1184	9.25742	9.56193	9.47933	8.77752	8.73948	8.84558	8.38262	9.09969	9.40156	9.21022	9.09969	8.82188	9.31216	9.09969	8.62567	8.73948	9.00771	8.8637	8.82188	8.91338
hsa-miR-1271-5p	1.00293	-0.568114	3.53381	0.000643287	0.00186024	-1.40143	UP	-1.70213	-1.61738	-1.58516	-1.57134	-1.16575	-1.2376	-1.55063	-1.52546	-1.67249	-0.168626	-1.30103	-1.11174	-1.57285	-1.64433	-1.4164	-1.62845	-1.13091	-1.02947	-1.34377	2.48882	-1.35138	-1.04535	-0.792648	-1.55614	-0.862626	-1.02774	-1.50421	-1.64695	-1.48952	-0.895687	-1.59003	-0.299681	-1.64229	-1.40019	-1.72575	-1.68781	-1.47576	-1.5912	-0.878027	-1.39765	-1.4982	-1.2248
hsa-miR-1273a	2.2853	1.49315	5.00821	2.64308e-06	1.25314e-05	3.86073	UP	4.27324	-1.61738	-1.58516	-1.57134	3.12496	-1.2376	-1.55063	-1.52546	3.41444	3.63265	-1.30103	2.56656	3.62996	-1.64433	3.0363	-1.62845	-1.13091	-1.02947	-0.874209	-1.66996	-1.35138	-1.04535	-0.792648	5.33938	4.7043	-1.02774	-1.50421	1.69945	-1.48952	-0.895687	-1.59003	-0.299681	7.5137	-1.40019	-0.0638791	2.78158	-1.47576	0.737923	-0.878027	-1.39765	3.34268	-1.2248
hsa-miR-1273c	3.67625	1.83103	9.12592	1.58958e-14	2.70254e-13	22.4844	UP	-1.68203	3.50847	1.45107	-1.57134	-1.67742	3.28353	5.19915	-1.52546	3.71535	-1.74038	2.42159	-1.11174	1.93442	0.906225	-1.4164	-1.62845	-1.13091	-1.02947	-0.755176	-1.66996	-1.35138	-1.04535	-0.792648	-1.55614	-0.862626	-1.02774	-1.50421	-1.64695	-1.48952	-0.895687	-1.59003	-0.299681	0.621857	-1.40019	3.40469	-1.68781	-1.47576	-1.5912	-0.878027	4.24392	-1.4982	-1.2248
hsa-miR-1273f	1.12806	4.59354	2.79975	0.00623306	0.0138904	-3.50702	UP	4.49146	3.8232	6.50222	1.24444	4.03248	5.27075	2.75909	5.16149	6.73938	6.10435	5.16414	5.2304	4.68812	4.69587	3.87505	4.83758	3.56125	-1.02947	3.90121	-1.66996	-1.35138	4.78377	5.8879	5.38104	6.73938	4.02768	5.10547	5.59032	1.41426	4.86852	-1.59003	-0.299681	8.75704	6.0524	2.92265	5.15436	4.00668	3.4337	4.83376	4.96582	4.40821	4.00323
hsa-miR-1273g-3p	-1.21296	7.87272	-7.17535	1.80462e-10	1.76002e-09	13.2536	DOWN	7.81202	8.22365	9.23212	8.19187	7.98524	8.42824	8.64662	8.48088	8.56758	9.33621	9.14214	8.88636	7.98524	9.09969	8.26824	8.11321	8.42824	8.05433	7.86601	8.66289	9.00771	8.68331	8.02582	8.34714	9.50516	6.72262	7.98524	8.77752	7.53713	8.79879	8.5477	6.50222	10.1715	8.91338	8.49922	7.88022	8.15984	7.47276	8.79879	8.9811	9.05529	9.38092
hsa-miR-1273h-3p	1.89835	1.4542	4.68953	9.48738e-06	4.05585e-05	2.62418	UP	2.16792	1.17603	1.76774	1.80609	-1.67742	-1.2376	-1.55063	-1.52546	-0.445286	-0.948544	-1.30103	-1.11174	3.79535	-1.64433	-1.4164	-1.62845	2.95256	4.07673	2.17086	3.88879	-1.35138	-1.04535	4.82203	-1.55614	-0.862626	-1.02774	-1.50421	-0.537538	-1.48952	5.01521	3.48321	-0.299681	-0.600055	2.09735	-0.0513407	-1.25578	2.14205	3.31723	-0.878027	-1.39765	4.82203	-1.2248
hsa-miR-1273h-5p	3.21033	2.08856	8.41114	5.02792e-13	7.00904e-12	19.0644	UP	0.582495	2.0183	-1.58516	4.26533	0.73522	2.85211	-1.55063	-1.52546	2.22299	4.95344	-1.30103	-1.11174	2.74814	4.129	-1.4164	-1.62845	-1.13091	-1.02947	-0.224989	5.02166	1.92169	-1.04535	-0.792648	-1.55614	-0.862626	-1.02774	-1.50421	3.18466	2.04778	-0.895687	3.66501	-0.299681	5.55667	-1.40019	2.08978	1.59397	1.95609	-1.5912	-0.878027	-1.39765	-1.4982	-1.2248
hsa-miR-128-1-5p	2.01017	6.59745	8.78197	8.39694e-14	1.32136e-12	20.8359	UP	6.20085	6.33999	6.12799	6.10435	6.51142	4.7559	5.73312	6.39796	5.39167	6.46538	5.59284	6.22513	5.77757	5.89443	5.97295	5.82398	6.33999	6.0977	5.92464	4.81346	6.32162	-1.04535	5.92056	6.5462	5.34608	6.02871	6.45174	5.85948	5.70507	4.68245	6.0678	-0.299681	4.09587	6.34908	6.57651	5.91648	6.89434	5.68357	6.43033	6.92143	5.69608	5.52529
hsa-miR-128-3p	-1.35302	0.497861	-3.08159	0.00271709	0.00675978	-2.74521	DOWN	2.81844	-1.61738	2.40308	2.53707	3.72769	-1.2376	4.3432	4.23434	2.5316	4.84556	2.60769	-1.11174	-1.57285	-1.64433	-1.4164	4.47346	-1.13091	3.51548	3.9477	-1.66996	5.00421	-1.04535	-0.792648	-1.55614	-0.862626	-1.02774	3.10451	1.69237	-1.48952	-0.895687	0.604099	-0.299681	3.9477	3.72769	-1.72575	3.39914	-1.47576	0.871286	-0.878027	-1.39765	2.13149	2.72225
hsa-miR-1281	1.9255	4.48487	5.11566	1.70132e-06	8.37599e-06	4.28817	UP	4.33711	5.14538	4.48074	1.23001	5.07002	4.40821	-1.55063	1.15434	4.47863	5.61821	-1.30103	4.34893	4.39456	2.26218	-1.4164	-1.62845	4.2481	5.07002	5.20542	5.58175	5.31315	-1.04535	5.61821	5.76473	5.64678	-1.02774	4.864	4.39821	-1.48952	5.48179	4.55234	5.65225	4.17751	4.79222	5.4112	5.07235	5.61821	4.52151	4.2812	4.36748	5.28078	4.77593
hsa-miR-1286	-1.35117	1.50876	-2.9082	0.00455729	0.0105979	-3.22104	DOWN	3.52029	4.53269	0.923769	3.32137	3.30357	3.21841	3.56796	2.51805	-1.67249	3.26026	5.38104	4.59308	2.74065	0.833198	5.59032	-1.62845	-1.13091	-1.02947	2.79251	0.507143	-1.35138	5.44056	-0.792648	-1.55614	-0.862626	3.17466	4.29543	2.95053	4.11515	-0.895687	4.52388	-0.299681	1.50096	-1.40019	1.49877	2.35653	2.09735	4.74704	-0.878027	4.763	-1.4982	3.94973
hsa-miR-1289	-1.07556	-0.241947	-2.67588	0.008825	0.0188008	-3.82243	DOWN	-0.136841	4.04895	-1.58516	3.54579	-1.67742	-1.2376	2.74065	-1.52546	-0.841418	0.806187	-1.30103	-1.11174	-1.57285	-0.64489	2.29326	2.39621	-1.13091	-1.02947	1.24681	-1.66996	-1.35138	-1.04535	-0.792648	-1.55614	-0.862626	3.94568	2.71102	2.20061	5.1173	3.16791	-1.59003	-0.299681	-1.64229	1.99774	-1.45041	4.63807	2.42159	0.627286	-0.878027	-1.39765	3.33179	-1.2248
hsa-miR-129-5p	1.13108	1.20096	2.66992	0.00897142	0.0190494	-3.83729	UP	-0.395473	2.69035	-1.58516	-1.57134	2.15442	-1.2376	-1.55063	-1.52546	2.90998	2.77787	-1.30103	3.01742	2.63037	0.794615	-1.4164	-1.62845	4.09587	4.68454	-0.432478	3.08335	-1.35138	-1.04535	-0.792648	3.15579	-0.862626	-1.02774	1.41143	-1.64695	3.34831	-0.895687	-1.59003	-0.299681	-0.583527	-1.40019	-1.72575	-1.36075	2.89039	3.9181	-0.878027	3.33179	5.05182	2.32863
hsa-miR-1290	-3.9949	8.1878	-16.1768	1.23824e-28	1.76449e-26	54.7008	DOWN	9.50516	9.1904	10.2552	10.7434	9.59044	11.1624	10.8929	10.4861	10.9305	10.0433	9.45357	8.96025	10.3752	10.8929	10.6687	10.5228	9.56193	9.25742	10.6687	9.96364	9.35637	10.0013	9.67509	9.45357	9.07915	10.5228	10.852	10.4497	10.8929	9.96364	9.67509	9.84619	9.25742	9.29935	9.77368	9.59044	9.96364	10.0013	9.73687	10.8158	9.81192	10.2119
hsa-miR-1293	2.44478	0.617868	6.46579	4.78042e-09	3.79622e-08	10.0293	UP	1.81624	2.17582	0.960879	-1.57134	0.208835	-1.2376	1.43053	-1.52546	-1.67249	3.59754	-1.30103	-1.11174	-1.57285	0.906225	-1.4164	1.25192	-1.13091	-1.02947	-1.68431	-1.66996	-1.35138	-1.04535	-0.792648	-1.55614	3.24649	-1.02774	-1.50421	-1.64695	-1.48952	4.59308	-1.59003	-0.299681	0.794615	-1.40019	2.5269	-1.68781	-1.47576	-1.5912	-0.878027	-1.39765	-1.4982	-1.2248
hsa-miR-1295a	-1.00113	0.080526	-2.44752	0.0162843	0.0319337	-4.3716	DOWN	-1.74038	2.62262	-1.58516	1.87667	2.07226	4.129	3.54579	-1.52546	0.722275	-1.74038	-1.30103	-1.11174	-1.57285	5.10547	3.16182	3.15233	-1.13091	3.2562	3.53471	-0.0466593	-1.35138	-1.04535	-0.792648	-1.55614	-0.862626	-1.02774	-1.50421	-1.64695	2.29651	5.03631	2.15146	-0.299681	0.726429	-1.40019	0.481308	3.38938	-1.47576	-1.5912	3.44238	1.69945	-1.4982	3.11287
hsa-miR-1295b-5p	-1.27027	-0.0205428	-3.12203	0.00240141	0.00608657	-2.631	DOWN	1.72868	-1.61738	4.7452	0.797038	2.06629	4.37959	2.0843	-1.52546	-1.67249	-1.74038	-1.30103	-1.11174	-1.57285	3.29504	-1.4164	-1.62845	-1.13091	4.38416	-1.68431	-1.66996	-1.35138	-1.04535	-0.792648	-1.55614	4.35881	-1.02774	-1.50421	1.72868	2.18005	-0.895687	-1.59003	4.98336	-1.64229	5.0237	1.54513	0.0519286	-1.47576	1.93442	-0.878027	1.83974	2.69035	-1.2248
hsa-miR-1296-5p	2.37672	1.81633	6.44826	5.17663e-09	4.03589e-08	9.95109	UP	1.68056	3.96456	-1.58516	2.62262	2.99057	4.42279	-1.55063	-1.52546	3.19118	3.29834	-1.30103	-1.11174	1.97449	2.63286	3.96285	1.77612	-1.13091	-1.02947	3.08953	4.07065	3.47162	-1.04535	-0.792648	-1.55614	-0.862626	-1.02774	-1.50421	1.71555	-1.48952	-0.895687	3.09211	-0.299681	3.08132	-1.40019	-1.1868	2.48315	-1.47576	-1.5912	-0.878027	-1.39765	-1.4982	-1.2248
hsa-miR-1303	2.64428	1.85022	6.0069	3.74618e-08	2.50887e-07	8.01019	UP	1.30253	-1.61738	3.67823	3.92504	1.64022	3.74453	-1.55063	2.35893	1.72	-1.74038	-1.30103	-1.11174	4.98921	-1.64433	-1.4164	2.59251	-1.13091	-1.02947	-1.68431	-1.66996	-1.35138	4.88078	-0.792648	2.42159	3.92504	-1.02774	1.46875	3.52029	2.9121	3.92099	-1.59003	-0.299681	6.19688	-1.40019	1.17603	0.360077	-1.47576	1.9853	-0.878027	-1.39765	-1.4982	3.07299
hsa-miR-1304-3p	3.0884	1.88873	8.54936	2.5824e-13	3.82882e-12	19.7238	UP	1.63758	0.592747	0.496956	0.941725	1.94586	-1.2376	-1.55063	2.3882	-1.67249	3.15881	3.75724	-1.11174	-1.57285	-0.626505	3.312	-1.62845	-1.13091	-1.02947	-1.68431	6.01858	4.38655	-1.04535	-0.792648	-1.55614	-0.862626	-1.02774	1.37555	-1.64695	-1.48952	-0.895687	1.51813	4.47346	0.858297	1.64022	4.21604	0.695846	2.44946	-1.5912	-0.878027	-1.39765	-1.4982	-1.2248
hsa-miR-1305	-1.03001	0.104081	-2.38159	0.0193002	0.0367521	-4.5222	DOWN	-0.870368	3.8797	3.3193	-1.57134	-0.686451	-1.2376	2.83188	-1.52546	-0.188736	0.677396	3.9372	-1.11174	-1.57285	0.420159	-1.4164	-1.62845	-1.13091	-1.02947	-1.68431	2.30168	2.36308	-1.04535	-0.792648	-1.55614	-0.862626	4.08066	4.68036	0.467604	-1.48952	-0.895687	-1.59003	-0.299681	-1.64229	-1.40019	1.50826	0.823099	-1.47576	4.40821	-0.878027	3.95562	-1.4982	3.92915
hsa-miR-1306-5p	2.33792	3.78952	6.31286	9.55068e-09	7.03811e-08	9.34988	UP	3.26537	4.03248	0.63511	3.62309	4.46662	-1.2376	-1.55063	1.3909	0.529099	4.59308	3.3193	4.83179	1.89763	-0.473467	4.97031	2.90998	4.2933	-1.02947	3.69567	-0.266813	5.12412	3.79115	-0.792648	2.30168	-0.862626	4.24601	4.59131	5.46637	4.90488	-0.895687	0.920505	-0.299681	1.09846	4.60247	5.31315	4.86852	5.32384	4.33711	-0.878027	4.27735	1.11385	5.22546
hsa-miR-1307-3p	-1.68039	6.8118	-8.05084	2.8391e-12	3.40294e-11	17.3524	DOWN	7.01285	8.41466	5.96966	7.00315	8.58736	7.47827	6.92744	6.51142	6.32162	6.19291	6.62673	7.08269	7.71505	6.2422	7.29533	6.83223	6.27774	6.3076	6.43033	7.46724	6.5462	6.12799	8.28464	7.85325	7.10702	6.4928	5.71452	6.86776	8.05433	5.64011	7.95247	7.47827	8.19187	9.23212	8.14455	8.5477	9.16725	9.21022	5.26281	9.25742	7.81202	8.5151
hsa-miR-130a-3p	-3.32996	1.13175	-8.06493	2.65369e-12	3.19564e-11	17.4192	DOWN	4.07065	3.7401	1.93585	-1.57134	4.26726	3.47162	3.69771	2.62262	5.20735	0.461011	4.52625	-1.11174	4.08657	3.27738	5.1716	4.00668	-1.13091	-1.02947	-0.64489	4.40106	-1.35138	4.51676	5.19915	-1.55614	-0.862626	-1.02774	3.98714	3.02015	3.39475	4.9977	4.82802	-0.299681	3.31723	2.8786	2.5316	0.930846	3.99593	4.5506	5.4264	5.33051	5.68357	4.98533
hsa-miR-132-3p	-1.50129	1.24907	-3.11811	0.0024304	0.0061479	-2.6421	DOWN	-1.55835	1.93442	-1.58516	3.92099	2.51445	-1.2376	4.85024	2.31346	3.61108	-1.55502	3.09469	-1.11174	-1.57285	-1.64433	2.35022	3.72973	-1.13091	4.54232	2.13149	1.70463	-1.35138	6.32925	4.65402	2.1637	4.13119	-1.02774	1.49337	3.86085	9.09969	5.23948	4.04535	4.48286	3.8232	-1.40019	2.84613	3.66092	-1.47576	4.41776	4.13895	-1.39765	4.22433	4.93288
hsa-miR-132-5p	-1.21962	-0.379978	-3.3677	0.00110852	0.00306067	-1.91173	DOWN	0.529099	2.07226	2.47834	0.895473	-1.67742	5.19348	5.09192	-1.52546	-1.67249	-1.74038	-1.30103	2.62788	-1.57285	1.27013	-1.4164	-1.62845	-1.13091	3.52986	1.2387	-1.66996	-1.35138	-1.04535	-0.792648	-1.55614	-0.862626	4.39638	2.99751	1.12188	1.5099	-0.895687	-1.59003	-0.299681	0.159571	3.39475	0.197341	-1.68781	-1.47576	3.7401	-0.878027	-1.39765	-1.4982	-1.2248
hsa-miR-133b	2.02175	2.88211	5.36708	5.96282e-07	3.19971e-06	5.3076	UP	2.3882	4.36532	4.88078	5.21668	1.56145	5.44056	5.97295	2.18005	4.64627	0.903571	-1.30103	3.32137	4.12466	4.31928	-1.4164	2.85534	3.53471	-1.02947	0.840209	-1.66996	2.11468	-1.04535	-0.792648	4.4536	-0.862626	-1.02774	-1.50421	4.51461	-1.48952	3.59977	1.9424	-0.299681	3.0363	-1.40019	3.8836	3.41444	1.52004	1.66545	-0.878027	2.33126	2.85211	4.85024
hsa-miR-134-3p	4.04422	1.97342	11.5744	1.2126e-19	3.88789e-18	34.1727	UP	1.58354	-1.61738	2.88124	1.68984	3.50184	-1.2376	-1.55063	-1.52546	0.663165	2.73846	-1.30103	-1.11174	-1.57285	1.12945	2.07226	4.61865	-1.13091	-1.02947	1.35951	4.91247	-1.35138	2.81844	-0.792648	-1.55614	-0.862626	-1.02774	-1.50421	-1.64695	-1.48952	3.15579	0.578011	-0.299681	-1.64229	-1.40019	3.68271	-1.10101	-1.47576	-1.5912	-0.878027	-1.39765	-1.4982	-1.2248
hsa-miR-1343-3p	-2.98598	8.06423	-29.7821	5.3485e-49	1.37189e-45	100.603	DOWN	8.73948	8.5477	9.40156	9.82905	8.72074	10.1715	9.84619	9.62142	9.50516	9.47933	9.23212	8.58736	9.62142	10.0013	9.40156	9.84619	9.1184	9.1904	10.2552	10.1715	9.31216	9.33621	8.84558	8.99441	8.64662	10.419	10.419	9.7082	9.62142	9.53385	9.25742	9.64725	9.1184	9.00771	9.62142	9.1184	9.45357	9.62142	9.56193	10.0864	9.34629	9.35637
hsa-miR-135a-3p	2.16483	6.48952	8.89411	4.88207e-14	7.97613e-13	21.3729	UP	6.7496	6.11895	5.24184	5.79908	6.3076	6.20085	6.42208	5.89443	6.07618	6.31451	6.61129	6.60634	6.42208	5.81442	6.47399	6.00901	6.58638	6.7496	5.8879	2.76771	5.16414	4.22029	5.49271	4.66341	-0.862626	6.53024	6.2501	5.62874	5.30288	4.13693	5.38632	-0.299681	4.90988	3.90575	6.14909	6.55424	6.14909	6.94069	5.52529	6.19291	4.78769	5.85651
hsa-miR-135b-3p	-1.7885	0.10919	-4.34673	3.56293e-05	0.00013681	1.35043	DOWN	0.840209	1.45411	2.09311	2.79957	1.13625	2.79604	1.05709	-1.52546	0.772418	-1.43378	3.47162	-1.11174	-1.57285	-1.64433	2.5269	1.72	2.85534	-1.02947	3.6039	-1.66996	2.60512	-1.04535	-0.792648	-1.55614	-0.862626	-1.02774	3.22136	2.67031	2.17086	4.7559	5.13671	-0.299681	-1.64229	-1.40019	3.24132	2.02826	3.59977	4.053	-0.878027	4.68454	-1.4982	3.33615
hsa-miR-136-5p	-1.34488	-0.156972	-3.29445	0.00140153	0.00376433	-2.13071	DOWN	-0.652044	-1.61738	-1.58516	-1.57134	2.47623	-1.2376	-1.55063	1.32473	4.96822	2.35653	5.2941	-1.11174	2.4051	0.977846	-1.4164	3.05803	-1.13091	-1.02947	-0.826055	3.36582	2.97604	-1.04535	4.95574	4.17144	3.79115	-1.02774	-1.50421	-1.64695	-1.48952	-0.895687	0.417297	-0.299681	3.96854	-1.40019	-1.72575	-1.10604	-1.47576	-1.5912	-0.878027	-1.39765	3.57992	-1.2248
hsa-miR-138-1-3p	1.44496	1.46737	3.47278	0.000787208	0.00223609	-1.5911	UP	0.318516	3.98303	-1.58516	2.19831	3.73622	-1.2376	1.43987	2.51805	0.989956	-1.74038	-1.30103	-1.11174	-1.57285	-0.508407	-1.4164	2.59977	-1.13091	-1.02947	0.950385	-1.66996	-1.35138	4.80516	-0.792648	3.83486	-0.862626	-1.02774	-1.50421	3.64886	-1.48952	-0.895687	1.01853	-0.299681	4.22813	3.03221	-1.47705	2.13503	2.0843	-1.5912	-0.878027	-1.39765	2.32436	-1.2248
hsa-miR-138-5p	1.76715	0.84144	4.54672	1.65766e-05	6.80305e-05	2.0861	UP	-1.66578	-1.61738	-1.58516	-1.57134	-1.12397	-1.2376	1.69718	4.29157	-0.784121	-1.74038	-1.30103	-1.11174	-1.57285	-1.64433	-1.4164	2.58203	-1.13091	4.59528	2.31832	-0.184088	-1.35138	-1.04535	-0.792648	-1.55614	-0.862626	-1.02774	-1.50421	0.167736	3.86581	-0.895687	-1.59003	-0.299681	1.52004	-1.40019	-1.72575	-1.37251	3.47727	1.69237	-0.878027	3.71041	3.17799	3.20571
hsa-miR-139-3p	2.42105	3.93661	6.33225	8.75127e-09	6.46888e-08	9.43565	UP	5.71452	4.41357	4.30556	5.355	5.03863	-1.2376	-1.55063	5.43807	3.02508	5.43067	4.7452	-1.11174	4.6141	0.147286	4.82203	-0.00774176	4.11905	5.1842	1.02971	2.86312	4.5814	-1.04535	3.70231	5.22174	4.33711	3.20803	1.97449	4.06097	2.10057	-0.895687	-1.59003	-0.299681	2.85856	3.38938	4.88949	4.30164	2.85856	-1.5912	4.25675	3.40886	5.30085	-1.2248
hsa-miR-140-3p	-3.19755	1.13184	-8.20701	1.34225e-12	1.73008e-11	18.0931	DOWN	4.66785	-1.61738	-1.58516	3.89259	-0.21022	5.12796	3.68813	3.09825	5.2442	-0.427714	4.15513	4.58526	2.70235	5.08518	3.81834	2.18501	2.8786	-1.02947	3.99123	2.93965	4.26533	-1.04535	3.80714	3.9372	-0.862626	-1.02774	5.96637	2.46643	4.053	-0.895687	2.40107	-0.299681	4.92644	2.92525	4.39456	2.51445	4.36532	4.93536	-0.878027	4.66785	1.49337	4.61673
hsa-miR-142-3p	-1.54414	0.227282	-3.37812	0.00107187	0.00297589	-1.88029	DOWN	-0.425159	-1.61738	0.732516	-1.57134	-1.67742	-1.2376	3.15233	-1.52546	1.41143	-1.74038	-1.30103	-1.11174	-1.57285	-1.64433	5.05182	3.96456	3.7693	4.53269	0.840209	0.485505	5.03631	-1.04535	-0.792648	-1.55614	-0.862626	4.27324	1.70463	3.97343	1.45107	-0.895687	2.02826	-0.299681	-0.496077	5.55147	3.69567	2.25441	3.66754	5.94475	-0.878027	3.05803	-1.4982	-1.2248
hsa-miR-143-3p	-1.47608	0.527941	-3.43559	0.000889285	0.00251768	-1.70545	DOWN	2.35237	2.90536	-1.58516	2.91423	3.63522	-1.2376	2.02126	2.68346	0.578011	0.117044	-1.30103	-1.11174	1.49877	4.04535	4.30735	0.365308	2.76771	-1.02947	0.920505	2.35893	4.36748	-1.04535	-0.792648	-1.55614	-0.862626	-1.02774	1.77188	2.36133	-1.48952	-0.895687	2.75584	-0.299681	-1.64229	6.17856	-1.72575	2.27919	3.71535	5.75103	-0.878027	4.46897	1.70204	3.07924
hsa-miR-145-5p	-1.39313	1.90752	-3.02175	0.0032554	0.0079073	-2.91198	DOWN	4.30164	4.99974	1.60066	4.64432	4.02768	-1.2376	4.53865	5.47125	5.29882	3.92915	-1.30103	4.72855	7.60681	3.47727	2.39864	4.70207	4.63573	4.85024	2.8402	2.47623	-1.35138	-1.04535	-0.792648	-1.55614	-0.862626	3.89466	3.63522	1.89469	4.0589	-0.895687	5.43067	-0.299681	-0.333418	1.91363	3.13725	2.0183	4.80317	5.24823	-0.878027	4.98921	3.38511	-1.2248
hsa-miR-1468-3p	-1.04009	-0.76176	-3.14481	0.00223893	0.00572569	-2.56612	DOWN	-1.67656	-1.61738	-1.58516	-1.57134	-1.67742	-1.2376	-1.55063	1.3677	-0.273973	4.864	-1.30103	-1.11174	3.07924	1.67341	-1.4164	-1.62845	-1.13091	3.67007	1.96738	4.97241	-1.35138	-1.04535	-0.792648	-1.55614	-0.862626	-1.02774	1.09566	2.75	-1.48952	-0.895687	-1.59003	-0.299681	4.82203	-1.40019	-1.72575	-1.68781	-1.47576	-1.5912	-0.878027	-1.39765	-1.4982	-1.2248
hsa-miR-1468-5p	1.58329	-0.135539	4.93668	3.53463e-06	1.63357e-05	3.57902	UP	-1.74038	0.663165	-1.58516	-1.57134	0.578011	-1.2376	1.82044	-1.52546	-1.67249	-1.74038	-1.30103	-1.11174	1.28407	-0.411462	-1.4164	-1.62845	-1.13091	-1.02947	-1.68431	-1.66996	-1.35138	-1.04535	4.68454	2.36929	-0.862626	-1.02774	-1.50421	-1.64695	-1.48952	-0.895687	-1.59003	-0.299681	2.72225	-1.40019	-1.72575	-1.68781	-1.47576	-1.5912	-0.878027	-1.39765	-1.4982	-1.2248
hsa-miR-1469	-1.15511	11.41	-13.8845	2.73894e-24	2.26625e-22	44.7882	DOWN	11.5659	11.5144	12.055	11.6117	11.2585	12.2004	12.3666	12.2004	12.251	11.8963	12.2004	11.7069	12.3666	12.6001	12.3117	11.5144	11.5659	11.6117	12.145	12.055	12.6001	12.0097	11.4553	11.9596	12.2004	10.7434	11.6117	12.0952	12.055	12.4294	11.7069	11.7069	12.3666	12.0097	11.354	11.7069	12.145	12.3666	12.3117	12.2004	11.9596	12.2004
hsa-miR-146a-5p	-1.01668	0.925992	-2.2007	0.0302627	0.0540933	-4.91657	DOWN	1.56538	-1.61738	-1.58516	-1.57134	4.23025	-1.2376	3.08132	2.35237	1.43987	-1.48181	2.96554	2.67757	-1.57285	4.95114	3.50847	3.06502	3.08538	4.40391	-1.68431	-0.178011	4.52151	3.46258	-0.792648	4.46897	3.69567	3.42256	1.51154	2.00985	-1.48952	3.36188	-1.59003	5.61329	-1.64229	-1.40019	1.06078	-0.0918462	-1.47576	-1.5912	-0.878027	-1.39765	4.65824	-1.2248
hsa-miR-147a	-1.0238	1.14287	-2.09287	0.0391159	0.0680219	-5.13833	DOWN	-1.61396	4.60247	0.456571	4.38655	3.36188	-1.2376	1.17199	1.77612	-0.351626	1.59397	4.88556	4.91247	2.37551	0.461011	4.92644	-1.62845	5.79335	3.70231	3.68047	-0.621198	-1.35138	-1.04535	-0.792648	-1.55614	-0.862626	5.54159	4.23025	-1.64695	1.9424	4.84376	4.53081	-0.299681	-1.64229	-1.40019	1.48495	0.134835	4.42279	5.89963	-0.878027	4.46216	-1.4982	3.82644
hsa-miR-149-5p	1.75143	3.10102	4.32355	3.88838e-05	0.000147978	1.26656	UP	0.211797	2.59977	1.66357	4.85218	3.6039	-1.2376	4.6141	1.24918	4.02351	2.3724	3.68047	3.4337	2.46643	4.01491	2.00532	4.36964	-1.13091	-1.02947	3.49985	1.95803	4.20836	-1.04535	4.40821	-1.55614	3.75968	-1.02774	4.1973	3.8836	-1.48952	-0.895687	0.548648	-0.299681	-1.64229	5.78769	3.61462	3.08132	4.65613	6.17856	-0.878027	4.68812	-1.4982	3.3259
hsa-miR-150-3p	1.06277	6.30498	4.15005	7.41575e-05	0.000264554	0.648312	UP	5.80519	6.25937	6.44729	6.29226	6.31451	5.56684	6.09448	6.50222	6.30065	6.66565	7.01285	7.3918	6.32162	6.86776	6.55424	6.55424	6.77241	6.73938	5.72797	2.74629	4.85412	-1.04535	4.91247	5.48835	5.80519	6.7822	6.0153	5.95279	6.46538	5.79335	6.72852	-0.299681	5.72466	5.4112	6.02186	6.22513	6.45619	6.55424	5.79908	6.70667	5.79908	6.72852
hsa-miR-150-5p	-1.12231	2.64501	-2.67372	0.00887765	0.0188816	-3.8278	DOWN	1.19752	2.17086	3.38725	3.73816	4.53081	4.52625	4.66341	2.09735	5.37146	4.61148	2.8661	4.37741	4.69985	4.93288	4.74147	4.01081	5.03182	5.33715	4.53081	2.15146	3.94143	-1.04535	-0.792648	-1.55614	-0.862626	6.06074	5.37645	5.23505	2.05687	3.98509	2.16792	-0.299681	4.7559	5.71452	2.30638	3.8011	4.01491	6.40753	-0.878027	3.37069	3.42758	3.14271
hsa-miR-151a-5p	-2.86318	0.88743	-6.26503	1.18453e-08	8.55864e-08	9.13863	DOWN	3.57491	2.94416	0.616505	-1.57134	4.58526	5.62254	2.12895	-1.52546	-0.53172	2.02624	-1.30103	4.40106	5.65225	4.29757	5.75103	-1.62845	-1.13091	-1.02947	4.62931	1.28122	4.46007	3.00416	-0.792648	-1.55614	-0.862626	5.15884	-1.50421	4.00668	4.10831	-0.895687	5.23948	4.88078	2.87597	3.04634	-0.475088	1.53295	5.08698	5.77445	4.09587	3.46691	2.59977	4.6246
hsa-miR-151b	-3.00136	0.872208	-6.73833	1.37409e-09	1.18671e-08	11.2547	DOWN	3.81377	-1.61738	-1.58516	1.76223	9.28653	4.24223	4.36748	4.40106	5.55667	-1.74038	-1.30103	-1.11174	1.41426	4.78769	4.50727	-0.298	3.28353	-1.02947	4.88949	2.21975	3.05803	-1.04535	-0.792648	1.66168	-0.862626	4.97241	1.48706	3.23526	5.07916	-0.895687	5.89963	-0.299681	1.93727	2.84613	4.27324	3.05803	5.25267	3.56602	-0.878027	2.45738	2.28213	-1.2248
hsa-miR-152-3p	-1.79675	0.0905223	-4.57099	1.50869e-05	6.25169e-05	2.17681	DOWN	-0.602275	-1.61738	-1.58516	-1.57134	0.582495	4.05682	0.915956	2.43823	2.04287	-1.57744	4.24053	3.34268	2.63763	-1.64433	3.44002	-1.62845	-1.13091	5.01312	1.47858	-1.66996	1.85033	-1.04535	5.24184	-1.55614	-0.862626	-1.02774	1.93442	1.79538	2.98621	-0.895687	0.674571	-0.299681	-1.64229	-1.40019	2.44188	0.6135	2.09311	0.983374	-0.878027	3.51548	2.99526	4.38178
hsa-miR-152-5p	1.81144	0.154135	4.82068	5.6368e-06	2.51888e-05	3.12726	UP	-1.68109	-1.61738	-1.58516	-1.57134	-0.897231	-1.2376	-1.55063	-1.52546	0.621857	-1.06204	-1.30103	-1.11174	2.44545	-1.64433	-1.4164	-1.62845	-1.13091	-1.02947	-1.68431	-1.66996	-1.35138	-1.04535	3.81605	-1.55614	3.35929	-1.02774	-1.50421	-1.64695	-1.48952	-0.895687	-1.59003	-0.299681	-0.0590659	-1.40019	-1.72575	-1.68781	-1.47576	-1.5912	-0.878027	5.66751	-1.4982	-1.2248
hsa-miR-153-3p	-1.66007	0.230175	-3.75131	0.00030761	0.000962219	-0.705312	DOWN	-1.51558	1.54078	2.65555	-1.57134	0.752593	5.15884	5.20349	2.11035	3.37599	-1.74038	-1.30103	5.05182	2.32246	2.75584	-1.4164	3.11998	-1.13091	-1.02947	-0.510593	2.27422	-1.35138	-1.04535	-0.792648	1.8091	-0.862626	-1.02774	2.12038	3.3259	-1.48952	-0.895687	1.37555	-0.299681	2.77787	-1.40019	4.09587	4.93738	-1.47576	2.61026	3.55074	-1.39765	-1.4982	3.92302
hsa-miR-1537-3p	-1.6716	0.421632	-3.84728	0.000220191	0.000710427	-0.388416	DOWN	2.64216	2.97888	4.71235	3.10677	-1.17735	-1.2376	3.67007	-1.52546	-0.469192	2.3339	5.30288	3.81834	-1.57285	0.812615	4.01956	1.40859	3.66501	3.39207	0.159571	-0.629044	-1.35138	-1.04535	-0.792648	0.933033	-0.862626	3.80497	3.73177	4.26109	-1.48952	3.52986	2.30168	-0.299681	3.61829	3.87738	-0.148396	-0.281401	-1.47576	4.81346	-0.878027	-1.39765	-1.4982	-1.2248
hsa-miR-1537-5p	-1.13777	-0.636803	-3.11358	0.00246443	0.00619731	-2.65497	DOWN	-1.74038	5.69012	-1.58516	-1.57134	-1.67742	-1.2376	3.00416	-1.52546	-1.67249	-1.74038	5.48507	3.16376	-1.57285	-1.64433	3.07299	-1.62845	-1.13091	-1.02947	-0.895687	0.384198	-1.35138	-1.04535	-0.792648	-1.55614	-0.862626	4.48696	3.75724	0.818363	-1.48952	-0.895687	2.3339	-0.299681	-1.64229	-1.40019	0.972352	-1.68781	-1.47576	4.14943	-0.878027	-1.39765	-1.4982	-1.2248
hsa-miR-1539	1.12633	3.87704	3.37254	0.00109136	0.0030198	-1.89715	UP	3.47162	3.87505	5.2831	3.90348	4.07912	5.53677	5.28078	5.74471	1.60336	3.89673	-1.30103	4.67213	3.16376	3.88165	4.26533	-1.62845	5.22546	3.03425	5.72135	2.36929	3.61108	-1.04535	-0.792648	3.33397	-0.862626	4.25235	4.763	4.18352	4.96822	4.62058	4.053	-0.299681	3.60755	4.28593	3.23526	4.19143	4.49475	5.16414	5.14921	4.78769	4.17942	-1.2248
hsa-miR-155-3p	-1.06128	-0.152981	-2.49966	0.0142051	0.0284213	-4.24995	DOWN	-1.74038	3.24649	-1.58516	-1.57134	-1.67742	4.28985	4.27324	2.71102	-0.781187	2.35237	-1.30103	-1.11174	2.36133	4.13895	-1.4164	-1.62845	3.87505	2.86312	-0.844143	-0.922549	2.70235	-1.04535	-0.792648	-1.55614	-0.862626	-1.02774	2.34397	3.34268	2.55162	-0.895687	-1.59003	-0.299681	-1.64229	1.82996	-0.218962	-1.68781	-1.47576	-1.5912	5.44056	-1.39765	-1.4982	2.35237
hsa-miR-1587	3.77319	3.68235	9.99034	2.41813e-16	5.25636e-15	26.6337	UP	3.2562	2.44946	3.93314	0.80367	5.10547	-1.2376	-1.55063	3.0363	1.66545	4.9221	3.73816	-1.11174	2.08704	2.1264	3.59531	1.71555	-1.13091	3.54579	4.70207	5.83114	2.09311	-1.04535	5.01963	2.35653	-0.862626	-1.02774	3.51788	3.88879	1.4187	-0.895687	4.21816	-0.299681	3.30163	2.91423	4.47346	3.59977	2.95704	-1.5912	-0.878027	2.35237	1.88824	-1.2248
hsa-miR-15a-5p	-2.84812	0.891532	-6.05275	3.05738e-08	2.08569e-07	8.20917	DOWN	4.40106	1.47624	-1.58516	4.20456	5.17936	4.68245	5.355	5.48835	4.61673	0.616505	4.2481	4.78769	5.39167	5.06629	4.18352	-1.62845	-1.13091	-1.02947	4.37959	4.55407	4.90246	-1.04535	-0.792648	-1.55614	-0.862626	3.46691	3.19118	1.56538	2.50442	-0.895687	3.10677	-0.299681	-1.64229	5.45567	-0.500604	1.54513	5.78769	3.67823	7.26191	-1.39765	2.54218	-1.2248
hsa-miR-15b-5p	-1.85364	1.84094	-4.30455	4.17633e-05	0.000157766	1.19805	DOWN	3.56125	0.240846	-1.58516	1.02696	4.64627	4.11024	2.94416	4.85412	3.84295	3.22136	2.15442	5.34389	3.34831	3.07019	4.54232	4.60699	4.47346	3.56364	1.97984	4.43089	-1.35138	3.46691	-0.792648	-1.55614	-0.862626	4.62931	3.59038	2.69412	2.83188	-0.895687	5.43558	-0.299681	-1.64229	5.62874	3.02289	3.84101	5.28734	5.73312	4.17144	5.60716	3.86581	-1.2248
hsa-miR-16-2-3p	1.14625	-0.100506	3.13936	0.00227687	0.00580535	-2.58169	UP	-0.87667	0.0965275	-1.58516	-1.57134	1.2728	2.76234	-1.55063	-1.52546	-1.67249	-1.74038	-1.30103	-1.11174	-1.57285	-1.64433	-1.4164	-1.62845	-1.13091	-1.02947	0.80367	-1.66996	-1.35138	-1.04535	-0.792648	4.84196	-0.862626	-1.02774	-1.50421	-1.64695	-1.48952	-0.895687	-1.59003	-0.299681	-1.64229	4.19143	-1.72575	4.053	2.49751	-1.5912	-0.878027	-1.39765	-1.4982	-1.2248
hsa-miR-16-5p	-2.5301	2.06916	-4.99315	2.81038e-06	1.33001e-05	3.80122	DOWN	4.52853	0.56533	4.00668	0.840209	5.7392	5.67074	5.32384	5.60142	5.27075	5.45105	4.82203	5.4264	5.4454	4.2933	5.34389	4.95114	4.30556	3.44002	3.12784	3.46691	4.6246	3.55346	4.91689	-1.55614	-0.862626	5.02788	3.87505	1.92615	2.24268	-0.895687	6.18622	5.15884	-1.64229	4.61865	1.56538	-0.465126	5.95279	3.83696	6.66565	3.36188	2.75909	-1.2248
hsa-miR-17-3p	-3.47329	4.47799	-13.7646	4.70328e-24	3.76997e-22	44.2519	DOWN	5.61821	5.72797	5.62874	5.27545	5.69608	7.54841	7.57286	5.71452	6.11525	6.11525	5.61329	5.2941	5.93112	6.70667	5.62037	6.50222	5.72135	5.73054	6.72852	5.74471	5.42101	6.73938	6.04852	5.94475	5.35273	6.10435	6.00333	5.93768	7.07141	6.09126	5.32384	6.45619	6.0524	5.40174	5.66429	5.64011	5.9042	6.44729	6.10435	7.08269	5.56684	6.98067
hsa-miR-17-5p	-1.77517	1.23859	-3.66565	0.000412697	0.00125274	-0.983153	DOWN	2.51198	3.95755	3.67199	3.14271	4.35479	3.65654	4.83758	-1.52546	4.30556	1.2086	4.763	-1.11174	-1.57285	4.2481	4.89462	4.67824	-1.13091	4.54232	3.68047	1.40256	-1.35138	-1.04535	-0.792648	-1.55614	4.61673	-1.02774	-1.50421	1.40859	2.50951	-0.895687	2.37551	-0.299681	-0.214022	3.77377	2.14205	3.47445	3.2886	2.98839	5.09192	3.55618	-1.4982	2.99057
hsa-miR-181a-5p	-2.0975	1.9179	-4.79769	6.17898e-06	2.74681e-05	3.03845	DOWN	1.11385	4.46007	3.23526	3.312	3.92099	4.58526	5.23505	4.50348	4.78769	-1.58368	5.26743	4.56165	5.32587	2.61393	4.78377	2.68346	-1.13091	-1.02947	3.06265	4.13305	4.12681	-1.04535	-0.792648	2.09145	4.38655	-1.02774	2.58403	4.32888	4.57232	-0.895687	4.42279	-0.299681	-1.64229	3.50184	2.75	2.46123	2.99975	4.48074	5.07002	4.53865	2.77279	4.10071
hsa-miR-182-3p	-1.1047	0.0961145	-2.35618	0.0205889	0.0386042	-4.57927	DOWN	-1.67627	-1.61738	-1.58516	-1.57134	0.68022	3.68047	5.26281	-1.52546	3.56796	-1.74038	-1.30103	-1.11174	3.04167	2.21446	3.92302	2.44545	-1.13091	3.78235	3.00416	-1.66996	-1.35138	5.72797	-0.792648	1.56813	-0.862626	-1.02774	-1.50421	3.87047	3.25412	5.08338	-1.59003	-0.299681	2.20943	-1.40019	-1.08547	-1.68781	-1.47576	2.06629	-0.878027	2.73627	-1.4982	5.07468
hsa-miR-182-5p	-1.06741	0.187133	-2.65902	0.00924502	0.019507	-3.86442	DOWN	-0.017044	0.475736	2.02422	-1.57134	2.93965	5.46637	5.57251	-1.52546	-1.07386	-1.45287	-1.30103	-1.11174	-1.57285	3.13184	-1.4164	-1.62845	2.6399	-1.02947	3.30163	0.534703	-1.35138	-1.04535	4.54855	3.68271	-0.862626	-1.02774	1.35786	3.30163	1.5099	-0.895687	-1.59003	-0.299681	-1.64229	-1.40019	-1.72575	-1.68781	2.22982	0.318516	-0.878027	-1.39765	2.42159	3.59531
hsa-miR-1825	2.34115	3.20023	5.51767	3.14691e-07	1.80578e-06	5.93036	UP	2.98397	3.21173	4.7208	3.90348	5.05182	-1.2376	4.5506	-1.52546	4.71235	1.96377	-1.30103	-1.11174	1.00652	-1.64433	-1.4164	-1.62845	3.06265	-1.02947	5.09192	6.16264	4.0822	4.05097	3.59531	4.35479	4.31731	-1.02774	-1.50421	-0.206033	-1.48952	-0.895687	4.61148	-0.299681	4.62931	2.58203	4.14305	4.13119	3.91095	-1.5912	-0.878027	3.68271	2.49177	4.2996
hsa-miR-183-3p	3.09543	0.926022	6.92367	5.83398e-10	5.31788e-09	12.0977	UP	-1.64986	3.59038	-1.58516	-1.57134	-1.67742	-1.2376	-1.55063	2.13503	-0.96778	2.93552	-1.30103	-1.11174	-1.57285	-1.64433	-1.4164	-1.62845	-1.13091	-1.02947	-1.68431	7.36533	4.53865	-1.04535	-0.792648	-1.55614	-0.862626	-1.02774	-1.50421	-1.64695	-1.48952	-0.895687	-1.59003	-0.299681	2.42502	-1.40019	-1.15745	-1.68781	-1.47576	-1.5912	3.65654	-1.39765	1.52912	-1.2248
hsa-miR-184	-2.23435	2.34398	-5.40945	4.98546e-07	2.74414e-06	5.48194	DOWN	4.98921	4.63807	1.53657	5.16414	3.97823	3.05152	4.41357	5.35727	2.95053	3.09825	5.5196	3.54579	5.72135	4.00668	5.52529	5.68357	5.53384	-1.02947	3.97098	3.41834	3.25412	-1.04535	3.75724	1.32151	-0.862626	5.61821	5.01521	4.05682	-1.48952	4.5814	1.35951	-0.299681	2.11252	3.57992	4.20836	4.78996	3.48321	4.82203	5.08698	4.63135	2.92925	-1.2248
hsa-miR-186-5p	-1.39776	0.343038	-2.85186	0.00536771	0.0121627	-3.37073	DOWN	1.62809	2.12198	2.50696	-1.57134	-0.928681	5.8104	1.38067	3.22955	3.721	-0.83167	4.77362	3.78673	2.97137	5.30288	-1.4164	2.4051	-1.13091	-1.02947	0.503967	-0.184088	2.17334	-1.04535	-0.792648	2.75909	-0.862626	5.17397	1.19333	3.53471	5.1173	-0.895687	-1.59003	-0.299681	3.49529	-1.40019	-1.72575	-1.68781	-1.47576	3.27386	5.046	-1.39765	-1.4982	3.41834
hsa-miR-187-3p	1.99085	0.755726	4.60851	1.3036e-05	5.44584e-05	2.31764	UP	1.92169	-1.61738	-1.58516	-1.57134	-1.67742	-1.2376	3.43568	2.8786	1.55073	-1.0491	-1.30103	-1.11174	-1.57285	-1.64433	-1.4164	1.64879	-1.13091	-1.02947	4.13895	4.69426	-1.35138	-1.04535	-0.792648	0.827879	-0.862626	-1.02774	-1.50421	-1.64695	4.16751	6.9976	-1.59003	-0.299681	-0.0214286	-1.40019	-1.23333	0.941725	-1.47576	-1.5912	-0.878027	-1.39765	-1.4982	-1.2248
hsa-miR-188-5p	1.05011	3.20712	3.00949	0.00337723	0.00817111	-2.94582	UP	2.83188	4.50727	-1.58516	5.58468	2.4363	4.96342	5.26909	5.45105	3.22432	5.53677	3.83907	4.27324	3.9372	3.44726	4.5679	5.11943	3.14779	3.54051	3.58552	2.86909	4.88556	3.06265	3.71041	1.2017	3.9372	3.69363	4.62931	1.55254	3.42758	-0.895687	1.50314	-0.299681	2.26218	3.55074	4.22433	3.29834	1.58936	-1.5912	3.63265	3.24132	1.83727	-1.2248
hsa-miR-18a-5p	-1.09303	0.272141	-2.51257	0.0137286	0.027554	-4.21949	DOWN	3.37599	4.07912	-1.58516	-1.57134	3.80303	-1.2376	3.42256	4.69587	4.58333	2.45353	-1.30103	-1.11174	1.85352	3.03425	2.01438	-1.62845	3.39914	-1.02947	4.34504	6.17014	-1.35138	-1.04535	-0.792648	2.27046	-0.862626	-1.02774	3.74856	-0.202989	3.02289	-0.895687	-1.59003	-0.299681	-1.64229	-1.40019	-1.72575	-0.87667	-1.47576	1.21649	4.38178	4.50135	-1.4982	-1.2248
hsa-miR-18b-3p	1.84651	2.86694	4.73419	7.9528e-06	3.45159e-05	2.79456	UP	2.72643	4.15141	4.88078	-1.57134	4.39638	5.13671	2.11879	4.47863	-0.491275	2.90266	-1.30103	-1.11174	2.21975	2.37869	-1.4164	2.75	2.81844	-1.02947	1.62548	-1.66996	-1.35138	5.8879	5.34827	2.83188	4.58954	-1.02774	2.88124	4.25675	-1.48952	-0.895687	2.07862	-0.299681	2.54218	2.66055	4.26533	3.10982	-1.47576	2.36133	-0.878027	2.48044	3.96854	-1.2248
hsa-miR-1909-5p	1.01292	3.30398	2.51914	0.0134916	0.027142	-4.20393	UP	5.03631	4.82413	-1.58516	3.86814	4.60247	2.53707	4.56605	4.43565	4.94344	5.01742	5.06179	4.76525	4.83977	3.40886	4.98533	4.1634	5.19154	-1.02947	4.864	0.111527	4.79703	-1.04535	-0.792648	1.47338	-0.862626	5.06629	5.05428	3.90348	3.5252	3.33179	-1.59003	-0.299681	0.780802	4.07912	4.97241	4.14745	3.39914	-1.5912	3.54051	4.353	2.6121	-1.2248
hsa-miR-191-5p	-6.18877	4.15404	-18.0737	5.18999e-32	1.02402e-29	62.3892	DOWN	7.33187	6.79257	6.45619	6.80151	6.87346	7.7263	6.21729	7.35304	7.62741	7.72068	6.17856	6.96888	7.79764	7.75451	6.96888	6.28467	6.44729	5.99582	6.32162	6.80151	7.05858	6.60634	6.63545	5.54723	6.02871	7.29533	8.72074	7.49043	7.22535	7.10702	7.47827	5.90878	7.88022	7.01815	7.24421	6.13509	7.61325	7.29533	7.60037	7.68901	8.26824	7.49043
hsa-miR-1910-3p	1.1483	1.29337	2.45062	0.0161535	0.0317014	-4.36443	UP	4.49922	1.26471	-1.58516	0.652945	-1.67742	-1.2376	3.90835	1.24084	-1.67249	3.80931	-1.30103	-1.11174	-1.57285	-1.64433	2.69941	0.743418	-1.13091	-1.02947	0.214758	0.220374	-1.35138	-1.04535	-0.792648	1.78449	-0.862626	4.53865	5.06815	4.2933	4.28789	-0.895687	4.7713	-0.299681	4.22029	-1.40019	2.35237	-0.802385	-1.47576	4.59308	-0.878027	3.74856	-1.4982	-1.2248
hsa-miR-192-3p	-1.32754	0.715074	-3.03209	0.00315578	0.00770911	-2.88334	DOWN	0.390121	-1.61738	-1.58516	-1.57134	-0.586066	4.17942	-1.55063	-1.52546	-0.897231	-1.52051	2.27046	3.45996	2.12198	0.0998462	3.10677	3.704	4.71637	-1.02947	2.72643	0.507143	-1.35138	4.11905	-0.792648	3.67391	4.7713	-1.02774	-1.50421	-1.64695	3.24649	-0.895687	0.764319	5.79908	3.98714	1.6949	-1.54782	1.25192	3.42256	4.64236	-0.878027	4.18352	4.98921	3.60184
hsa-miR-192-5p	1.45224	2.12845	3.50679	0.000703633	0.00201431	-1.48572	UP	-1.66782	-1.61738	2.22623	-1.57134	4.85024	2.25441	4.75389	3.92915	3.74856	-1.74038	4.353	-1.11174	3.13998	0.743418	-1.4164	1.62809	-1.13091	3.09469	3.91095	-0.017044	-1.35138	-1.04535	-0.792648	-1.55614	3.86581	-1.02774	-1.50421	3.67391	-1.48952	-0.895687	4.87295	-0.299681	2.02826	2.33874	-1.56961	0.318516	3.88879	2.54823	-0.878027	3.42256	1.79342	4.7713
hsa-miR-193a-3p	-1.4434	1.05777	-3.21804	0.00178347	0.00465846	-2.35505	DOWN	2.85534	3.93314	-1.58516	0.616505	2.86312	-1.2376	4.82623	-1.52546	1.96187	3.13454	4.1047	-1.11174	3.88879	0.663165	4.20456	3.66092	2.69412	3.34268	2.06435	0.312901	-1.35138	5.06179	-0.792648	0.877253	-0.862626	-1.02774	2.62051	4.94763	1.81624	4.34504	-1.59003	-0.299681	4.47346	-1.40019	2.05964	4.28789	-1.47576	3.38007	5.39673	3.91095	4.7208	3.28353
hsa-miR-193a-5p	-1.2075	3.80117	-3.6075	0.000502591	0.00150075	-1.16907	DOWN	4.83376	4.80516	3.59038	5.66128	4.78048	3.87047	6.72852	3.20121	5.82756	4.63573	5.96637	4.35658	5.92464	4.87295	5.70221	5.30804	5.11277	3.93314	5.63131	1.93035	4.63807	-1.04535	-0.792648	0.920505	5.61329	5.57881	5.13857	5.92056	4.69985	3.18799	4.38655	-0.299681	5.8715	3.30357	4.49475	4.83758	2.50951	5.06179	3.22955	5.19915	5.21185	5.31315
hsa-miR-194-3p	1.91857	1.85744	4.09342	9.12417e-05	0.00031972	0.450257	UP	2.22623	1.43987	5.19348	-1.57134	3.17238	-1.2376	-1.55063	3.60573	3.24391	-1.48181	-1.30103	-1.11174	2.39621	-1.64433	4.06599	1.69237	-1.13091	-1.02947	3.2886	0.865879	-1.35138	5.11516	3.77588	4.93041	-0.862626	-1.02774	-1.50421	5.08518	-1.48952	-0.895687	-1.59003	-0.299681	1.18346	3.01742	4.09043	2.79957	-1.47576	1.72496	-0.878027	-1.39765	2.48044	4.41566
hsa-miR-195-3p	-1.24741	1.9464	-2.42917	0.0170782	0.0331861	-4.41388	DOWN	-1.45891	4.65824	-1.58516	-1.57134	2.4051	5.91648	5.37146	3.07299	5.21185	-0.378665	4.67824	6.12347	2.87597	3.81605	2.32246	5.14921	-1.13091	-1.02947	-1.68431	-1.66996	-1.35138	4.68812	7.95247	6.43033	-0.862626	4.6246	1.08377	3.79535	3.36188	4.50348	5.96637	-0.299681	1.88126	-1.40019	-1.72575	1.67015	3.7888	4.49475	3.57992	4.48286	2.1264	4.13119
hsa-miR-197-3p	1.59654	4.10923	4.82752	5.48477e-06	2.46814e-05	3.15371	UP	1.59796	4.51676	5.4112	0.77011	3.76212	5.51713	4.53457	4.00668	5.64678	1.26745	4.57938	-1.11174	2.82491	4.8988	2.15948	3.91457	-1.13091	3.79915	4.68454	6.77241	4.49146	-1.04535	-0.792648	5.59032	3.47727	-1.02774	4.87703	2.0843	3.33615	5.15884	4.83758	-0.299681	4.50135	4.36103	4.40821	4.17144	4.73251	2.65031	4.57736	2.58203	4.07912	3.56125
hsa-miR-1972	1.45968	2.7006	3.38403	0.00105159	0.00293189	-1.86242	UP	4.06599	1.9481	3.04634	-1.57134	3.35285	-1.2376	-1.55063	2.32055	1.0882	4.66563	4.67213	5.54935	3.66092	4.50348	-1.4164	4.40606	4.73251	-1.02947	0.381308	2.19112	4.66082	-1.04535	-0.792648	3.04634	3.99593	2.87597	-1.50421	2.30168	-1.48952	-0.895687	4.28593	5.88175	2.00532	3.46475	-1.4853	-0.281401	3.51788	4.25675	-0.878027	3.78465	4.69265	4.11515
hsa-miR-1976	2.2056	4.4655	6.25215	1.25508e-08	9.0429e-08	9.08189	UP	4.48286	5.88482	4.09043	3.29834	5.33938	3.22693	-1.55063	4.33309	4.61148	2.37869	4.96342	2.57453	4.64627	5.04095	3.95755	-1.62845	4.10831	-1.02947	3.76453	2.04778	2.74629	-1.04535	5.30546	5.42101	4.3432	-1.02774	4.38178	5.07468	3.08538	-0.895687	3.75968	-0.299681	5.21185	5.50931	5.71452	5.5043	2.43823	3.61829	3.22432	2.36484	4.82623	4.32888
hsa-miR-198	1.29045	2.57058	3.00197	0.00345403	0.00831105	-2.96652	UP	4.07912	2.34807	4.42279	3.96655	4.39638	2.93965	3.74856	2.74065	4.41357	-1.74038	-1.30103	-1.11174	4.1634	1.71266	3.05803	4.18536	-1.13091	2.87253	4.58526	-1.66996	-1.35138	-1.04535	-0.792648	1.92392	4.48286	3.47162	-1.50421	4.38178	-1.48952	-0.895687	-1.59003	-0.299681	4.80516	2.70529	0.263956	4.46426	4.48491	4.053	-0.878027	2.18501	-1.4982	2.46383
hsa-miR-199a-5p	1.3479	2.45526	3.21467	0.00180238	0.00469829	-2.36485	UP	-1.66996	2.40924	-1.58516	-1.57134	3.31723	3.71705	4.69426	1.12945	2.41576	-1.74038	4.11515	-1.11174	2.63037	-1.64433	-1.4164	4.11905	5.12412	3.82482	3.29504	-1.66996	-1.35138	-1.04535	-0.792648	5.8879	-0.862626	4.07434	-1.50421	4.47121	1.76774	-0.895687	0.562736	5.55667	5.34164	2.34807	-0.27733	3.85838	1.79786	1.35786	4.29757	2.59251	2.44366	2.92925
hsa-miR-199b-5p	1.8499	1.3122	4.1822	6.58729e-05	0.000236644	0.761591	UP	-1.63216	3.7401	0.722275	4.70621	-1.67742	-1.2376	-1.55063	-1.52546	0.448088	-1.74038	-1.30103	-1.11174	-1.57285	4.86136	-1.4164	1.63758	-1.13091	3.2886	-1.68431	-1.66996	-1.35138	-1.04535	4.94763	1.58936	-0.862626	-1.02774	-1.50421	-1.64695	3.38007	-0.895687	-1.59003	-0.299681	4.27735	-1.40019	-1.72575	1.83481	3.83907	1.67667	-0.878027	-1.39765	1.07626	3.23526
hsa-miR-19a-5p	-1.80439	0.387416	-3.67546	0.000399131	0.00121871	-0.951589	DOWN	-1.42904	4.28593	-1.58516	3.96113	0.00376923	3.00416	3.38938	-1.52546	2.17582	-1.4164	5.52529	-1.11174	-1.57285	2.64662	4.19498	1.12188	5.2096	4.87703	3.59977	-1.66996	-1.35138	-1.04535	-0.792648	-1.55614	4.26919	-1.02774	4.2812	-1.64695	4.0822	-0.895687	-1.59003	-0.299681	-1.64229	2.8933	3.16376	-0.946516	-1.47576	1.46698	4.24392	4.25455	-1.4982	4.09043
hsa-miR-19b-1-5p	-1.16947	-0.053354	-2.6507	0.00945871	0.0198703	-3.88503	DOWN	-1.258	-1.61738	1.45956	-1.57134	-1.67742	3.76453	4.7713	4.35881	-1.67249	-0.438912	2.00758	-1.11174	-1.57285	1.79538	-1.4164	-1.62845	5.07002	-1.02947	-1.68431	-1.66996	3.41444	-1.04535	-0.792648	-1.55614	-0.862626	-1.02774	2.52925	-1.64695	5.55667	4.58526	0.541484	-0.299681	-0.178011	2.85211	-0.239374	-0.412648	-1.47576	3.96285	5.98767	4.44907	-1.4982	-1.2248
hsa-miR-19b-3p	-2.2381	1.65975	-4.5687	1.52215e-05	6.27703e-05	2.16826	DOWN	2.98397	1.73373	3.7401	-1.57134	4.88949	4.13693	4.21604	4.89462	4.32516	4.82981	4.82802	4.26919	3.44726	4.93288	4.05491	-1.62845	3.59754	-1.02947	4.90063	6.23286	-1.35138	-1.04535	4.0822	-1.55614	-0.862626	3.19436	3.94568	1.35786	3.04634	6.18622	2.62788	6.19291	3.73816	2.90998	1.67667	4.30556	3.94973	-1.5912	5.14538	4.59748	3.2562	2.85211
hsa-miR-200a-3p	-1.51908	0.328972	-3.37761	0.00107365	0.0029772	-1.88184	DOWN	0.732516	-1.61738	-1.58516	-1.57134	0.823099	4.47604	3.26786	4.02559	-1.67249	-0.964604	2.99526	3.67823	2.00985	3.5252	3.0089	-1.62845	-1.13091	-1.02947	2.5452	-0.196703	-1.35138	3.67607	-0.792648	-1.55614	-0.862626	5.4112	3.89897	3.27034	3.98303	-0.895687	-1.59003	-0.299681	-1.64229	1.66168	-0.0387527	3.96113	-1.47576	4.88317	5.64011	-1.39765	2.41758	3.84502
hsa-miR-200a-5p	-1.4299	1.13419	-2.98893	0.00359099	0.00859225	-3.0023	DOWN	2.20617	3.97583	2.80746	4.7559	3.02289	-1.2376	4.68812	4.39456	1.50826	3.32137	3.06265	3.15579	-1.57285	1.76451	-1.4164	3.10677	4.9814	3.79915	-1.68431	5.78281	3.98714	-1.04535	-0.792648	2.34397	-0.862626	-1.02774	2.94735	0.0998462	3.96456	-0.895687	-1.59003	6.59696	4.141	-1.40019	2.40107	1.9051	4.19143	3.06034	6.95922	-1.39765	3.50391	-1.2248
hsa-miR-202-3p	-1.77493	1.01149	-3.54518	0.000619389	0.00181186	-1.36583	DOWN	0.342159	-1.61738	1.87667	4.10271	3.59038	-1.2376	6.38135	-1.52546	-0.196703	0.235571	5.28925	3.5252	3.25203	-0.325335	4.07434	-1.62845	-1.13091	-1.02947	2.36133	3.51322	-1.35138	-1.04535	-0.792648	-1.55614	-0.862626	4.40821	2.30168	4.70812	5.15179	4.57011	2.06629	-0.299681	-1.64229	3.90121	0.092	4.71637	2.92925	5.35727	3.39695	5.09192	-1.4982	5.20349
hsa-miR-202-5p	-1.37237	0.597274	-2.76532	0.00687279	0.0151449	-3.59589	DOWN	0.155505	-1.61738	-1.58516	-1.57134	3.17238	4.03248	3.78005	-1.52546	-1.67249	-0.000164835	-1.30103	-1.11174	-1.57285	3.54826	3.53229	3.67823	2.61616	4.12466	-0.83167	-1.66996	-1.35138	-1.04535	3.71705	-1.55614	-0.862626	4.85024	-1.50421	0.365308	2.66055	3.19436	-1.59003	-0.299681	0.787945	-1.40019	-1.72575	3.38007	2.75584	5.08338	-0.878027	5.73312	-1.4982	4.94763
hsa-miR-204-5p	1.29696	1.51407	3.24874	0.00161961	0.00427673	-2.26541	UP	-1.24016	2.31346	3.55618	-1.57134	2.16939	-1.2376	1.93727	1.10126	-1.67249	-1.22832	4.42903	-1.11174	1.35236	2.85856	-1.4164	-1.62845	-1.13091	-1.02947	-1.68431	3.0363	-1.35138	-1.04535	-0.792648	2.62051	4.09587	3.49273	-1.50421	2.11468	1.21649	5.02166	-1.59003	5.2304	0.6135	-1.40019	-1.16907	3.64018	-1.47576	0.395945	-0.878027	-1.39765	3.73622	3.56602
hsa-miR-208a-5p	1.27568	5.18799	3.11635	0.00244358	0.00616908	-2.64711	UP	7.46724	6.87915	5.046	5.64678	7.13725	4.22029	2.41395	5.64011	5.01963	4.31928	-1.30103	4.15513	4.87295	-1.64433	4.97031	5.87464	-1.13091	4.61148	4.07434	0.260297	5.14043	7.14311	6.0977	7.41711	6.38911	-1.02774	3.96655	4.85873	5.56967	5.72135	5.98767	6.32925	6.41637	5.60716	6.72852	5.59032	5.80213	5.14921	-0.878027	-1.39765	3.64677	5.11037
hsa-miR-20b-5p	-2.12667	1.25776	-4.12241	8.20732e-05	0.000291172	0.551395	DOWN	1.29235	2.58203	4.62931	1.03246	2.12198	2.26453	6.70667	-1.52546	3.0363	1.45715	-1.30103	5.00664	2.36133	5.17397	4.65402	4.02768	3.74453	5.21668	3.12209	3.40469	-1.35138	4.36532	-0.792648	-1.55614	-0.862626	4.17942	-1.50421	3.36582	1.79786	-0.895687	2.19831	-0.299681	-1.64229	4.81976	-1.45745	-1.68781	4.15513	5.01312	-0.878027	4.26533	-1.4982	2.81063
hsa-miR-2113	3.11257	0.596168	11.1927	7.4558e-19	2.2499e-17	32.3702	UP	-1.58631	-1.61738	-1.58516	-1.57134	2.35022	-1.2376	-1.55063	-1.52546	1.2017	2.13326	-1.30103	-1.11174	-1.57285	-1.64433	-1.4164	-1.62845	-1.13091	-1.02947	-1.18109	5.2731	1.95998	-1.04535	-0.792648	-1.55614	-0.862626	-1.02774	-1.50421	-1.64695	-1.48952	-0.895687	-1.59003	-0.299681	0.548648	-1.40019	2.00071	-1.68781	-1.47576	-1.5912	-0.878027	-1.39765	-1.4982	-1.2248
hsa-miR-2114-3p	-3.31627	0.70598	-8.25101	1.08645e-12	1.42199e-11	18.3022	DOWN	0.571407	2.32246	-1.58516	4.2812	-1.09655	4.33711	2.13503	4.01956	3.73622	0.430132	-1.30103	4.71235	2.03073	-1.64433	4.42279	4.28789	-1.13091	-1.02947	3.81834	3.01327	-1.35138	5.35984	3.92504	2.73163	-0.862626	-1.02774	4.70621	3.30551	5.71793	4.63807	-1.59003	5.59032	4.2996	-1.40019	3.37599	2.74065	2.50442	2.40107	4.88078	4.23631	3.99123	5.04095
hsa-miR-2115-3p	-1.25069	0.142471	-2.9705	0.00379327	0.00901738	-3.05268	DOWN	-1.17735	1.47052	0.714066	3.75095	2.81063	-1.2376	1.53657	1.17199	2.31082	0.0612033	5.14921	2.87597	-1.57285	1.40256	3.54579	0.663165	-1.13091	3.11787	-1.13986	4.58954	3.0674	3.51548	-0.792648	1.46447	-0.862626	4.19962	-1.50421	-1.64695	-1.48952	-0.895687	-1.59003	5.27545	3.83696	-1.40019	-0.750868	-1.68781	-1.47576	2.15442	4.10071	-1.39765	1.79342	-1.2248
hsa-miR-2115-5p	-1.49856	0.0176593	-3.63865	0.000452361	0.00136026	-1.06977	DOWN	-1.57541	-1.61738	-1.58516	0.797038	-1.67742	-1.2376	4.28357	1.30542	3.89259	2.27919	3.7888	3.89069	3.76695	3.58552	-1.4164	-1.62845	-1.13091	-1.02947	2.81063	-1.66996	-1.35138	-1.04535	-0.792648	3.47445	-0.862626	-1.02774	4.92427	4.84196	-1.48952	-0.895687	-1.59003	-0.299681	1.06785	-1.40019	1.72496	4.03693	-1.47576	2.63037	-0.878027	4.11216	3.55346	4.63338
hsa-miR-214-5p	1.90359	0.184372	4.77286	6.82128e-06	3.01665e-05	2.94285	UP	0.630736	-1.61738	-1.58516	-1.57134	-1.09056	-1.2376	-1.55063	-1.52546	5.06179	-0.114846	-1.30103	-1.11174	-1.57285	-1.64433	-1.4164	-1.62845	-1.13091	-1.02947	-1.04346	-1.66996	-1.35138	-1.04535	-0.792648	-1.55614	-0.862626	-1.02774	-1.50421	-1.64695	-1.48952	-0.895687	-1.59003	-0.299681	-1.64229	-1.40019	-1.72575	-1.68781	-1.47576	-1.5912	-0.878027	-1.39765	1.71266	-1.2248
hsa-miR-215-3p	-1.16165	0.228637	-2.48748	0.0146683	0.0292795	-4.27857	DOWN	1.46447	3.92915	3.3567	0.968879	-1.67742	3.19436	3.96113	-1.52546	-1.67249	-1.20524	5.08338	-1.11174	-1.57285	5.28078	2.82491	-1.62845	-1.13091	-1.02947	-1.68431	-1.66996	-1.35138	-1.04535	-0.792648	-1.55614	-0.862626	4.19143	2.3724	-1.64695	4.44009	-0.895687	4.87703	-0.299681	3.40469	-1.40019	1.34454	2.72643	-1.47576	4.1932	-0.878027	-1.39765	2.23286	3.34268
hsa-miR-215-5p	-1.15961	0.346583	-2.67525	0.00884029	0.0188177	-3.82399	DOWN	0.503967	-1.61738	3.05803	2.27046	2.15948	2.46643	-1.55063	1.2017	3.91095	4.07434	3.13454	3.39914	-1.57285	-1.64433	-1.4164	3.08953	-1.13091	-1.02947	-1.68431	2.88124	-1.35138	-1.04535	-0.792648	-1.55614	-0.862626	3.13725	2.49177	2.70529	-1.48952	-0.895687	1.51154	-0.299681	1.57087	5.18178	1.68531	-0.178011	-1.47576	3.68813	6.15647	-1.39765	2.8786	2.47623
hsa-miR-216a-3p	1.39069	0.5409	3.52989	0.000651727	0.00188252	-1.41369	UP	0.318516	1.71777	0.836703	-1.57134	0.162071	4.49922	1.1578	-1.52546	-1.67249	-0.720725	-1.30103	4.20646	-1.57285	0.655588	-1.4164	-1.62845	-1.13091	-1.02947	-0.580934	-0.786615	-1.35138	-1.04535	-0.792648	-1.55614	-0.862626	-1.02774	3.33179	1.0534	-1.48952	-0.895687	1.90942	-0.299681	-1.64229	2.42905	-0.228451	-0.337764	4.72469	3.86085	-0.878027	2.71721	-1.4982	-1.2248
hsa-miR-216a-5p	-1.08803	0.374036	-2.39228	0.0187795	0.0359741	-4.49802	DOWN	-0.136841	-1.61738	-1.58516	2.92925	-1.67742	2.32436	4.16751	1.02696	3.70569	-1.74038	-1.30103	4.36103	4.15952	4.82623	-1.4164	5.11516	-1.13091	-1.02947	-1.68431	1.17199	-1.35138	-1.04535	-0.792648	-1.55614	-0.862626	5.5043	-1.50421	1.01853	3.4337	-0.895687	4.03693	5.78281	-1.64229	2.21195	-1.09655	3.74231	-1.47576	4.71436	-0.878027	4.88556	1.54703	-1.2248
hsa-miR-219b-3p	-1.02538	-0.215515	-2.48639	0.0147106	0.0293411	-4.28114	DOWN	-1.74038	0.183571	-1.58516	3.07299	-1.67742	-1.2376	3.28353	-1.52546	-0.261725	-0.806912	5.69914	-1.11174	1.55464	2.25441	4.93041	-1.62845	-1.13091	-1.02947	-1.68431	-1.66996	-1.35138	-1.04535	4.11905	-1.55614	-0.862626	3.05477	-1.50421	-1.64695	-1.48952	-0.895687	4.07434	-0.299681	2.49751	-1.40019	1.19333	-1.68781	-1.47576	-1.5912	-0.878027	2.0332	-1.4982	2.65555
hsa-miR-22-3p	-4.20995	4.68632	-10.943	2.4606e-18	6.86026e-17	31.1853	DOWN	7.1661	5.72135	5.7392	5.86246	6.23286	7.86601	6.71673	7.23842	8.30041	3.88879	5.55407	6.31105	7.78429	7.10702	6.38135	5.8372	5.53384	5.23273	7.73944	8.15984	7.7263	6.48286	6.84495	5.78769	4.89462	7.008	10.0013	8.05433	5.7392	6.86776	8.03296	-0.299681	8.70052	6.60634	4.89462	5.35727	7.50175	7.60037	7.98524	7.83932	7.15402	5.8715
hsa-miR-222-3p	-1.97991	1.20825	-4.24416	5.23474e-05	0.00019209	0.981571	DOWN	-1.45287	4.12681	1.06078	3.93314	2.23589	4.7452	4.0404	1.50096	5.22174	3.23526	-1.30103	-1.11174	1.40859	-1.64433	4.81749	-1.62845	4.20456	5.52529	3.72973	4.68633	2.42159	4.71637	-0.792648	2.85211	-0.862626	3.23526	4.53457	4.30914	4.69265	5.34608	0.342159	-0.299681	-1.64229	4.12681	2.17086	0.461011	-1.47576	1.90057	4.56605	5.11037	5.05674	3.71875
hsa-miR-223-3p	-1.39828	3.16232	-3.01458	0.00332609	0.0080561	-2.93177	DOWN	4.18721	5.36714	4.62259	-1.57134	4.65009	5.40663	4.35881	5.3624	2.58203	5.67738	-1.30103	5.08698	3.95934	5.15884	4.141	3.94143	-1.13091	-1.02947	4.60699	7.1314	5.34389	-1.04535	4.48696	3.8836	-0.862626	3.17011	4.42903	5.50931	5.19154	-0.895687	5.79908	-0.299681	5.84947	3.82644	3.46258	3.34549	4.64021	5.13188	6.08343	4.7579	4.8988	3.75095
hsa-miR-223-5p	-1.32279	-0.126187	-3.33108	0.00124696	0.00339538	-2.02168	DOWN	0.995791	-1.61738	4.73932	-1.57134	-1.67742	-1.2376	1.10654	-1.52546	-1.67249	-1.32492	-1.30103	-1.11174	0.799462	0.0226868	-1.4164	3.88879	-1.13091	-1.02947	0.0142747	-1.66996	-1.35138	4.78048	-0.792648	3.13184	-0.862626	3.02289	-1.50421	1.82436	4.62931	4.5506	4.01956	-0.299681	0.496956	-1.40019	-0.218962	-1.68781	1.74523	-1.5912	-0.878027	4.57011	-1.4982	3.79351
hsa-miR-224-5p	-1.12874	0.412498	-2.46972	0.0153679	0.0304391	-4.32008	DOWN	-1.59077	-1.61738	1.80034	-1.57134	0.333286	-1.2376	-1.55063	3.51548	5.17936	-0.508407	-1.30103	-1.11174	2.0183	1.38067	2.84316	4.48074	-1.13091	5.35727	2.96554	5.79908	4.61673	5.00421	-0.792648	-1.55614	-0.862626	4.00015	-1.50421	-1.64695	3.98714	-0.895687	-1.59003	-0.299681	1.55674	-1.40019	3.24649	1.57569	-1.47576	-1.5912	3.89673	-1.39765	-1.4982	-1.2248
hsa-miR-2276-3p	1.24194	2.4513	2.89941	0.00467586	0.0108148	-3.24456	UP	4.61865	1.95609	4.46216	2.89996	2.62262	4.63807	1.27837	4.1634	2.12198	1.75144	3.8797	-1.11174	1.48918	-1.64433	2.81844	1.92615	-1.13091	4.04535	4.02768	-1.66996	-1.35138	-1.04535	-0.792648	2.50096	5.19154	-1.02774	4.68454	4.13119	-1.48952	-0.895687	4.33711	-0.299681	4.80118	1.79342	1.93727	4.04287	2.33874	-1.5912	-0.878027	-1.39765	2.71102	2.69941
hsa-miR-2277-3p	1.71216	1.84412	3.89674	0.000184966	0.000614555	-0.222867	UP	3.99123	-1.61738	4.12681	-1.57134	4.54232	-1.2376	-1.55063	3.40677	3.16182	2.11468	-1.30103	-1.11174	2.70235	2.89996	3.58552	-1.62845	3.05803	-1.02947	2.98839	-1.66996	-1.35138	-1.04535	3.61829	3.44238	4.06599	-1.02774	-1.50421	-1.64695	-1.48952	-0.895687	4.1973	-0.299681	5.38104	2.50951	-1.72575	1.46875	1.82044	-1.5912	-0.878027	-1.39765	1.64879	-1.2248
hsa-miR-2277-5p	2.7948	2.43224	7.36668	7.34469e-11	7.59642e-10	14.14	UP	0.63511	3.71535	2.75	1.55254	4.0404	-1.2376	1.21255	-1.52546	1.60689	1.74523	-1.30103	-1.11174	4.7579	-1.64433	-1.4164	2.39173	3.93314	3.64467	3.52986	4.82802	-1.35138	-1.04535	4.22029	-1.55614	-0.862626	3.64257	-1.50421	3.04634	-1.48952	-0.895687	-1.59003	5.5281	1.00089	2.73163	2.49177	-0.519011	3.49786	1.00652	-0.878027	2.39621	4.48696	-1.2248
hsa-miR-2278	3.02065	2.0293	7.07178	2.92863e-10	2.7822e-09	12.7765	UP	4.94344	2.3882	1.32151	-1.57134	3.94143	3.11287	-1.55063	2.40107	4.74147	4.56421	-1.30103	-1.11174	0.970615	1.92169	-1.4164	4.12681	-1.13091	-1.02947	0.933033	-1.66996	3.87047	-1.04535	-0.792648	2.96554	-0.862626	-1.02774	3.98063	-1.64695	-1.48952	-0.895687	-1.59003	-0.299681	-1.64229	-1.40019	1.8224	-1.68781	-1.47576	1.37019	-0.878027	-1.39765	-1.4982	-1.2248
hsa-miR-2355-5p	1.81753	3.11613	4.50917	1.91661e-05	7.7419e-05	1.94635	UP	2.17794	4.14305	3.70001	4.01724	4.65402	-1.2376	1.12188	4.1634	0.658231	2.95459	-1.30103	-1.11174	1.92169	-1.64433	-1.4164	-1.62845	4.13305	-1.02947	5.09605	2.07667	4.10271	4.07065	4.31928	5.61821	3.50184	4.22623	-1.50421	3.73177	-1.48952	3.32364	5.61821	5.3106	5.11943	2.93965	5.2941	3.39475	3.18799	-1.5912	-0.878027	2.01438	-1.4982	-1.2248
hsa-miR-2392	1.80186	5.13234	5.52253	3.08226e-07	1.77264e-06	5.9506	UP	5.15436	5.11943	4.26533	5.05182	5.24823	-1.2376	3.44238	5.07002	5.4611	4.44252	4.79222	-1.11174	6.57651	5.27075	5.49271	5.66429	3.55346	-1.02947	5.70793	4.10831	3.21841	-1.04535	4.56421	4.94763	3.92099	5.53677	5.74471	5.8879	4.5874	-0.895687	5.63699	-0.299681	5.77757	4.69265	5.95279	4.51676	5.17397	4.32516	4.97031	6.42208	5.66429	5.03182
hsa-miR-23a-3p	-4.01156	4.88858	-9.72526	8.72022e-16	1.70743e-14	25.3618	DOWN	7.85325	5.65225	1.61354	5.89443	7.23188	7.78429	6.7496	7.85325	8.88636	5.23505	5.46637	6.65519	7.34266	6.27774	7.08269	6.69642	5.89703	4.69038	8.62567	8.9811	7.98524	7.52593	7.57286	6.53024	4.57232	7.67475	11.2075	8.3334	6.07618	-0.895687	7.98524	-0.299681	8.23813	7.33187	6.12799	5.37396	8.5151	8.87503	8.64662	8.36458	7.75451	5.84947
hsa-miR-23b-3p	-4.33621	5.01087	-11.9535	2.02039e-20	7.29901e-19	35.9513	DOWN	7.58608	5.87464	4.48696	6.0153	7.53713	7.96987	7.18369	7.89342	8.5477	5.14043	3.85838	6.71673	7.75451	6.53796	8.34714	6.92143	6.27005	4.76751	8.9811	8.25386	7.86601	5.18959	6.66565	6.30065	3.90121	7.79764	10.9764	8.5477	6.89941	5.68685	8.49922	-0.299681	7.25001	7.98524	6.36559	5.88482	8.82188	9.09969	8.52329	8.77752	7.52593	5.53091
hsa-miR-23c	-1.92281	1.23207	-4.09591	9.04171e-05	0.000317699	0.458924	DOWN	1.9853	2.95053	3.40886	4.59748	-1.67742	5.51713	5.25496	-1.52546	-1.02147	1.53657	5.61821	4.21604	4.79703	4.84196	4.36103	0.908879	3.4337	-1.02947	4.51461	0.402868	-1.35138	-1.04535	-0.792648	-1.55614	3.63779	-1.02774	4.32516	2.8786	3.64257	3.86085	5.79335	-0.299681	2.79251	3.52029	0.865879	1.90942	4.44907	4.87499	-0.878027	3.11537	2.67757	4.71235
hsa-miR-24-1-5p	-2.74341	1.73255	-5.92214	5.44519e-08	3.527e-07	7.64411	DOWN	3.28607	4.6246	-1.58516	3.19902	0.587022	3.96655	5.33051	4.02559	3.26026	2.5316	4.15141	4.54232	5.17397	4.30164	5.07002	1.95035	4.47863	4.03008	2.37551	1.64879	3.68271	2.75909	-0.792648	-1.55614	-0.862626	5.1842	2.82491	4.68454	6.16639	-0.895687	6.29226	-0.299681	-1.64229	3.73816	2.19112	4.22433	5.19348	5.56173	-0.878027	4.72855	-1.4982	4.96005
hsa-miR-24-3p	-2.64826	5.68204	-7.03176	3.52944e-10	3.34059e-09	12.5927	DOWN	7.27734	6.85357	5.51198	6.7496	7.20242	7.52593	7.35304	7.07705	7.30541	6.33999	5.84262	7.26191	7.8257	6.81512	8.0401	7.85325	7.2718	7.30541	7.78429	6.69642	6.32925	6.77241	6.65519	5.64011	6.10435	7.3918	7.49043	7.92502	6.70667	6.04465	7.8257	-0.299681	6.32162	6.50222	6.48286	7.04703	7.86601	8.1753	7.68901	8.12968	6.55424	6.64488
hsa-miR-2467-3p	-3.21539	7.97541	-11.9293	2.26492e-20	8.06876e-19	35.8379	DOWN	9.38092	8.5151	9.53385	8.68331	7.29533	10.3124	9.28653	9.28653	10.6687	10.5571	8.70052	8.09745	8.68331	8.91338	8.02582	9.08942	7.93879	8.96025	9.84619	8.20935	10.852	14.9147	9.07915	7.88022	12.8936	9.38092	10.2552	11.4553	11.8297	11.4032	8.05433	8.66289	6.67492	10.5571	8.60658	8.38262	9.84619	9.33621	7.83251	8.5477	8.48088	8.66289
hsa-miR-2682-3p	2.31216	2.66076	6.41958	5.89581e-09	4.48747e-08	9.82335	UP	0.920505	4.8988	2.01438	2.99975	3.05803	-1.2376	0.825489	3.37334	3.78005	3.41165	4.50348	-1.11174	3.98714	0.49133	-1.4164	2.06927	3.01327	-1.02947	2.82491	4.71235	2.48044	-1.04535	3.67007	1.21649	-0.862626	-1.02774	3.25203	0.752593	2.64662	3.75968	3.52986	-0.299681	3.85398	3.60184	3.47162	-0.643286	4.40391	-1.5912	-0.878027	-1.39765	-1.4982	-1.2248
hsa-miR-2682-5p	-1.23168	0.440832	-2.95388	0.00398455	0.00940238	-3.09787	DOWN	3.63265	0.871286	-1.58516	-1.57134	-1.67742	-1.2376	4.23631	1.86419	0.175527	1.29235	-1.30103	-1.11174	2.48587	0.267615	3.20988	-1.62845	4.14305	-1.02947	-0.270643	2.59251	-1.35138	-1.04535	4.88949	-1.55614	-0.862626	3.14271	2.69412	0.639451	3.74453	-0.895687	2.31609	5.87464	-1.64229	4.67413	4.06832	-0.475088	2.05274	2.43823	5.16414	-1.39765	-1.4982	2.58603
hsa-miR-26a-2-3p	-1.4818	0.707168	-3.35577	0.00115197	0.0031662	-1.94767	DOWN	0.578011	1.6678	3.15406	4.96342	0.365308	5.72135	4.91689	-1.52546	-1.06435	0.187637	-1.30103	4.57232	-1.57285	0.208835	5.54441	-0.049	5.01963	4.71235	3.54051	3.13454	-1.35138	-1.04535	-0.792648	-1.55614	-0.862626	4.18352	2.5642	0.338967	2.00532	-0.895687	1.3909	-0.299681	-1.64229	4.95114	3.15406	-1.68781	1.40256	5.14043	4.09043	4.00668	-1.4982	-1.2248
hsa-miR-26a-5p	-2.51178	1.75886	-5.98254	4.17207e-08	2.75099e-07	7.90477	DOWN	4.21021	1.69237	2.11879	2.43823	4.40606	2.59251	3.76212	2.58603	4.21604	2.30168	-1.30103	2.86909	3.01535	3.91095	5.86836	-1.62845	5.34827	3.20571	5.40663	5.30288	2.5316	3.75968	-0.792648	2.65555	-0.862626	4.1047	4.88949	2.02422	4.31302	-0.895687	1.25466	-0.299681	3.0674	2.96554	4.2933	3.56125	4.30164	6.75555	5.63388	4.32516	2.01438	3.99123
hsa-miR-26b-3p	2.24735	2.01042	5.37395	5.79248e-07	3.12137e-06	5.33582	UP	1.25832	2.76503	2.58603	2.09311	0.406577	-1.2376	0.77011	-1.52546	4.36532	-1.58468	4.05491	-1.11174	3.40469	-0.419929	-1.4164	1.38067	4.08066	-1.02947	-1.68431	3.71535	-1.35138	3.22955	-0.792648	3.13725	-0.862626	4.01956	-1.50421	2.73627	-1.48952	6.53024	-1.59003	-0.299681	3.57742	-1.40019	-1.72575	0.677396	-1.47576	1.96738	-0.878027	-1.39765	2.00532	2.32055
hsa-miR-26b-5p	-1.37619	0.089859	-3.23087	0.00171319	0.00449319	-2.31767	DOWN	-0.443791	0.927033	-1.58516	-1.57134	-0.83167	-1.2376	3.15579	-1.52546	2.07226	-1.74038	-1.30103	4.00323	-1.57285	1.73626	2.14205	-0.331462	-1.13091	-1.02947	2.00985	5.03631	1.92615	-1.04535	-0.792648	3.67823	-0.862626	4.26919	1.62097	-1.64695	9.31216	-0.895687	0.616505	-0.299681	-1.64229	-1.40019	0.785505	1.33897	3.64257	5.33715	5.37645	2.93552	-1.4982	-1.2248
hsa-miR-27a-3p	-2.35554	1.27015	-5.07835	1.9836e-06	9.64451e-06	4.13916	DOWN	-0.926648	-1.61738	-1.58516	3.08132	1.38604	3.9372	2.49177	4.7579	5.23948	-1.58853	5.11516	3.07924	5.01963	4.61673	3.67007	3.67391	-1.13091	4.7713	4.18352	1.54513	-1.35138	3.66754	-0.792648	-1.55614	-0.862626	3.87047	-1.50421	4.43327	2.51805	3.79351	3.47445	-0.299681	1.24444	4.763	1.03496	3.23526	4.47863	4.93041	4.65402	5.95946	-1.4982	3.90121
hsa-miR-27b-3p	-1.91652	1.51579	-4.26264	4.88623e-05	0.000181378	1.04757	DOWN	2.61026	3.54051	-1.58516	3.8797	-0.141538	-1.2376	3.49786	5.34827	5.39673	-1.74038	2.67394	-1.11174	3.37599	2.40924	2.53707	3.98303	5.13671	2.7853	4.44252	-1.66996	-1.35138	-1.04535	-0.792648	2.31609	-0.862626	4.34504	3.84502	3.75529	4.76751	3.68813	5.34389	-0.299681	1.48091	-1.40019	1.69945	2.29326	4.21205	4.96822	5.12412	4.69265	-1.4982	3.78465
hsa-miR-28-5p	-2.31405	1.73029	-4.77218	6.8397e-06	3.01959e-05	2.94025	DOWN	3.59977	2.24268	3.04167	-1.57134	3.34549	2.99975	3.97823	4.4536	5.2831	4.09043	3.9181	4.07434	4.42279	4.30735	5.26003	5.54723	3.85591	-1.02947	4.08657	2.3339	1.83974	-1.04535	-0.792648	-1.55614	-0.862626	-1.02774	3.40469	4.03248	6.66565	-0.895687	4.04535	5.8879	-1.64229	2.57271	1.70978	2.55162	4.27735	2.52427	3.76695	5.27075	-1.4982	4.58954
hsa-miR-296-3p	-1.49739	6.91827	-11.833	3.56653e-20	1.18807e-18	35.3873	DOWN	7.30541	7.17757	7.53713	8.09745	7.42968	7.92502	8.71063	8.06824	7.45669	7.26191	7.70807	7.04703	8.38262	7.81202	8.48088	8.1753	7.8257	8.06824	7.88022	6.7117	6.48783	6.86776	6.94792	5.91648	6.33999	8.3334	8.97068	8.23813	7.63946	6.98067	8.15984	6.68604	6.40753	6.84495	7.2718	7.83932	7.77692	8.38262	7.78429	8.46324	7.36533	8.77752
hsa-miR-298	-2.62507	1.79591	-6.10586	2.41439e-08	1.66476e-07	8.44048	DOWN	3.05152	2.66543	4.43565	3.9372	3.95755	5.63131	3.19436	4.11905	4.87703	4.51246	4.83376	-1.11174	4.96005	1.70463	4.88753	3.79351	3.86085	4.15732	4.47346	2.06629	-1.35138	-1.04535	-0.792648	4.19143	-0.862626	-1.02774	4.09043	4.763	3.61829	-0.895687	2.05687	-0.299681	4.65824	3.37069	3.83486	1.43342	2.35022	-1.5912	4.80516	5.14043	5.5196	5.55667
hsa-miR-299-3p	-1.76621	1.08166	-3.87716	0.000198217	0.000647676	-0.288599	DOWN	3.42507	3.4337	-1.58516	2.23589	-0.922549	4.38655	3.03221	3.24649	3.67391	-1.74038	4.9768	4.68812	3.0674	3.26026	-1.4164	4.51676	-1.13091	-1.02947	1.60513	-1.66996	-1.35138	4.32125	4.26109	1.05151	4.4536	-1.02774	-1.50421	3.05803	-1.48952	-0.895687	-1.59003	5.65827	3.34831	-1.40019	1.14479	4.52625	-1.47576	4.1932	5.43067	2.73163	2.90998	4.40821
hsa-miR-29b-1-5p	-5.20007	1.9944	-13.7161	5.85678e-24	4.55232e-22	44.0343	DOWN	5.2304	5.20735	5.43558	4.82623	5.75765	6.3076	5.83114	6.07618	5.2941	3.7888	4.56421	2.84613	5.77132	5.33938	4.2812	5.46374	-1.13091	4.44907	6.51142	5.62254	-1.35138	5.64678	5.50154	4.65402	-0.862626	3.64677	5.53091	5.87464	2.59977	3.67823	5.2236	-0.299681	-0.578341	4.78769	2.57635	4.61673	5.07916	4.14305	5.88175	6.28467	3.98509	4.86852
hsa-miR-29b-2-5p	-2.29284	1.21073	-5.3045	7.75824e-07	4.07784e-06	5.05141	DOWN	4.71235	4.353	4.18352	-1.57134	1.96377	4.93041	4.32125	5.28542	3.90348	1.50314	-1.30103	3.60573	3.53229	4.67413	-1.4164	4.0822	3.79535	-1.02947	1.38067	4.49146	-1.35138	-1.04535	-0.792648	1.76774	-0.862626	3.44726	-1.50421	0.220374	4.85024	5.07916	-1.59003	-0.299681	0.0142747	2.44545	0.211797	3.07299	3.67823	1.75144	5.22546	5.01102	4.62058	4.91247
hsa-miR-29b-3p	-5.32967	3.57308	-16.6295	1.85659e-29	2.97635e-27	56.5783	DOWN	4.94938	5.3218	6.43845	5.71123	5.63388	6.76149	7.01285	6.5203	6.4928	5.56428	5.67738	5.43558	6.19291	7.03478	6.67492	6.46538	5.45105	5.5043	6.67492	6.27005	5.82398	6.41637	6.3076	5.67074	5.98073	6.93345	6.4928	6.70667	6.85357	5.26281	4.96342	6.29226	5.70221	5.4611	5.48179	5.48835	6.31451	6.43845	5.78281	7.07141	6.09126	6.61624
hsa-miR-302b-3p	-1.08199	-0.287015	-2.9036	0.00461901	0.010722	-3.23336	DOWN	-1.27749	2.34397	-1.58516	-1.57134	-0.0295495	4.54649	-1.55063	-1.52546	-1.67249	-1.25872	-1.30103	3.19902	-1.57285	0.541484	-1.4164	2.25441	-1.13091	-1.02947	-1.68431	0.267615	-1.35138	-1.04535	-0.792648	-1.55614	4.31108	-1.02774	2.95459	2.13503	2.76234	-0.895687	1.82044	-0.299681	-1.64229	4.54232	0.0251758	2.11468	-1.47576	2.8284	-0.878027	2.30638	-1.4982	-1.2248
hsa-miR-302c-3p	-1.01929	-0.162782	-2.47982	0.0149665	0.0297589	-4.2965	DOWN	-1.63311	3.25203	2.46123	4.4536	1.16878	3.87505	-1.55063	3.95368	-1.67249	-1.74038	-1.30103	-1.11174	-1.57285	0.356879	4.72469	-1.62845	-1.13091	2.91423	-1.23333	1.92615	-1.35138	-1.04535	-0.792648	-1.55614	-0.862626	-1.02774	-1.50421	-1.64695	1.53476	-0.895687	2.41395	-0.299681	0.660698	7.22535	-1.72575	0.80367	-1.47576	0.790385	-0.878027	4.1756	-1.4982	-1.2248
hsa-miR-302c-5p	-1.44711	4.25205	-5.18036	1.30201e-06	6.57414e-06	4.54799	DOWN	4.80118	4.89205	4.07249	7.01285	5.00664	7.33726	5.58468	4.48491	4.66341	5.3624	6.10435	5.5592	5.10547	5.4611	4.99126	5.63388	3.42256	5.09192	5.53091	2.90998	5.11516	5.07692	4.9791	-1.55614	4.87891	5.87464	5.77132	5.19915	5.95279	3.84101	5.5068	-0.299681	2.14851	5.63388	5.45105	5.83114	4.89462	6.69642	6.00901	6.36559	5.14043	5.54159
hsa-miR-302d-5p	-1.31538	-0.273788	-3.24854	0.00162065	0.00427673	-2.26602	DOWN	-1.62287	-1.61738	5.12412	-1.57134	2.31609	-1.2376	5.52529	1.76774	-0.803533	-1.74038	-1.30103	4.36532	1.43053	-0.337764	-1.4164	3.92099	-1.13091	-1.02947	-1.68431	-1.66996	-1.35138	-1.04535	-0.792648	-1.55614	-0.862626	-1.02774	4.66785	-1.64695	2.97137	-0.895687	-1.59003	-0.299681	2.92525	-1.40019	0.629011	-1.68781	-1.47576	0.732516	-0.878027	3.9181	1.43809	3.57992
hsa-miR-3064-3p	1.57045	0.899055	3.65612	0.000426302	0.00129098	-1.01377	UP	1.82996	3.08132	4.21021	2.14205	-0.376516	-1.2376	1.67667	1.82996	4.34504	-1.29859	-1.30103	-1.11174	-1.57285	-1.64433	-1.4164	-0.251341	-1.13091	-1.02947	2.24268	-1.66996	-1.35138	-1.04535	-0.792648	2.29001	-0.862626	-1.02774	-1.50421	-0.395473	1.8567	-0.895687	-1.59003	-0.299681	1.2086	2.46123	1.56145	-0.366604	-1.47576	-1.5912	-0.878027	-1.39765	-1.4982	-1.2248
hsa-miR-30a-3p	-1.46167	0.835514	-3.34436	0.001195	0.00326431	-1.98193	DOWN	-0.559132	0.522253	1.63493	-1.57134	1.26745	4.69265	3.95755	1.2086	3.04401	0.780802	-1.30103	-1.11174	1.25466	3.68813	-1.4164	4.78769	4.55234	-1.02947	4.95114	1.53657	-1.35138	4.74888	-0.792648	-1.55614	-0.862626	-1.02774	1.83481	2.69941	-1.48952	4.24392	-1.59003	-0.299681	2.31832	2.21975	0.0877912	-1.68781	1.60336	2.69224	-0.878027	4.77593	-1.4982	4.74888
hsa-miR-30a-5p	-1.95632	0.426618	-4.58714	1.41685e-05	5.88062e-05	2.23734	DOWN	1.85033	-1.61738	5.31518	3.34268	0.772418	4.70621	2.5452	5.03631	4.00323	1.33897	3.72325	4.80516	2.10562	5.51713	2.555	-1.62845	3.17011	-1.02947	2.90998	2.73163	-1.35138	-1.04535	4.12252	-1.55614	-0.862626	-1.02774	-1.50421	-1.64695	1.97984	-0.895687	4.43089	-0.299681	-1.64229	3.51548	0.435341	-1.68781	3.05803	1.63493	5.21668	-1.39765	-1.4982	-1.2248
hsa-miR-30b-3p	3.112	2.72315	6.43996	5.37522e-09	4.16539e-08	9.91412	UP	3.66092	-1.61738	-1.58516	-1.57134	3.5252	3.2034	-1.55063	-1.52546	-0.0414396	1.87667	2.30638	-1.11174	4.39821	3.80931	-1.4164	3.20803	-1.13091	3.8836	1.01007	7.79096	3.2886	-1.04535	5.00178	-1.55614	4.27324	-1.02774	-1.50421	2.20061	-1.48952	3.88879	-1.59003	5.53677	4.67213	2.59251	-1.72575	0.353681	6.35714	-1.5912	3.21841	-1.39765	3.61285	-1.2248
hsa-miR-30c-1-3p	2.05009	4.92639	6.58323	2.79905e-09	2.28649e-08	10.5552	UP	4.08438	3.44238	6.04465	-1.57134	5.22174	5.00883	4.19962	1.26198	5.70221	4.2812	5.45567	5.16414	5.16924	5.5281	3.95368	2.72434	3.86581	3.3193	4.44907	5.47725	3.17466	-1.04535	-0.792648	4.92644	5.28925	3.40886	4.09043	4.62931	5.0237	5.58468	3.67391	5.03631	5.26743	5.11943	4.86136	4.63338	3.11287	4.21205	-0.878027	2.63763	5.70793	6.10435
hsa-miR-30c-2-3p	-1.49808	0.888081	-3.51882	0.000676126	0.00194642	-1.44824	DOWN	2.00758	-1.61738	3.56602	3.62726	3.8836	4.3036	2.29001	2.05687	0.092	2.80429	4.71436	-1.11174	2.93758	3.74231	2.80429	-1.62845	-1.13091	-1.02947	2.35237	2.02826	2.76771	-1.04535	-0.792648	0.743418	-0.862626	4.98921	1.87897	3.34831	4.9768	-0.895687	5.07002	-0.299681	-1.64229	2.35237	2.39621	-0.202989	2.40924	5.34827	-0.878027	4.09829	-1.4982	-1.2248
hsa-miR-31-5p	-1.44675	0.981373	-2.9164	0.00444925	0.010356	-3.19906	DOWN	-1.69601	-1.61738	4.76751	-1.57134	3.85591	4.67612	6.36559	1.74201	1.09566	0.677396	4.36964	-1.11174	5.15436	1.71266	-1.4164	4.38842	-1.13091	-1.02947	2.95053	-1.66996	2.44946	-1.04535	4.22433	2.99526	-0.862626	-1.02774	3.95934	2.27046	1.70978	4.11905	1.9051	4.67213	2.66055	2.31082	-1.72575	-1.68781	-1.47576	0.941725	-0.878027	3.85204	1.39509	5.25267
hsa-miR-3120-5p	1.11632	-0.102865	3.1071	0.00251377	0.00631521	-2.67331	UP	-1.74038	-1.61738	2.57453	-1.57134	-1.67742	-1.2376	-1.55063	-1.52546	0.958802	-0.926648	-1.30103	-1.11174	-1.57285	-1.64433	-1.4164	-1.62845	-1.13091	-1.02947	-1.68431	-1.66996	-1.35138	-1.04535	-0.792648	-1.55614	3.79115	-1.02774	1.89469	-1.64695	-1.48952	-0.895687	1.30542	-0.299681	3.23526	-1.40019	2.26453	-1.21507	-1.47576	0.56533	-0.878027	-1.39765	2.59251	-1.2248
hsa-miR-3121-5p	-2.16995	0.458589	-4.80091	6.1002e-06	2.71649e-05	3.05086	DOWN	1.67015	0.761319	4.65205	0.983374	1.2086	2.85211	1.70978	-1.52546	-1.67249	0.410286	-1.30103	5.19348	-1.57285	3.312	4.23237	-1.62845	2.56656	-1.02947	0.920505	-0.649956	-1.35138	3.56989	-0.792648	-1.55614	3.56989	4.84556	3.88165	-1.64695	5.63388	4.52625	5.09605	-0.299681	-1.64229	4.03471	2.51445	3.46691	3.7972	5.37146	-0.878027	3.16182	-1.4982	5.07916
hsa-miR-3124-5p	-1.26086	3.41373	-3.34522	0.00119168	0.00325869	-1.97933	DOWN	5.91648	4.44496	4.96582	4.98921	5.32819	4.94763	4.00015	5.85651	6.0153	5.43558	5.34164	3.55346	4.31731	2.33632	5.00178	4.79222	4.64236	4.20646	4.49475	-1.66996	5.58468	4.52625	-0.792648	4.54048	5.04095	4.47346	3.04893	4.65824	3.10224	-0.895687	4.78048	-0.299681	5.27545	3.71875	4.59748	5.20735	3.70231	0.554286	3.64886	2.36929	4.12079	3.70231
hsa-miR-3125	-1.00457	0.583422	-2.19229	0.0308847	0.0550516	-4.93424	DOWN	3.0674	-1.61738	-1.58516	3.82644	2.33632	-1.2376	1.48918	-1.52546	1.89763	2.59977	-1.30103	-1.11174	-1.57285	-1.64433	2.91423	4.41566	-1.13091	-1.02947	4.353	5.47125	2.54823	4.03471	4.30914	-1.55614	-0.862626	-1.02774	2.06241	-0.257016	3.80497	-0.895687	-1.59003	6.21729	3.67391	-1.40019	1.00652	-1.05505	1.58197	-1.5912	4.9814	4.31302	1.54703	4.2812
hsa-miR-3127-3p	1.19454	0.742063	2.86996	0.00509404	0.0116351	-3.32292	UP	-0.805797	-1.61738	3.21173	-1.57134	2.87597	-1.2376	-1.55063	2.31346	1.3183	-0.524797	-1.30103	-1.11174	1.5057	-1.64433	1.59397	-1.62845	-1.13091	-1.02947	0.920505	-0.576214	3.44238	2.88748	-0.792648	-1.55614	-0.862626	-1.02774	-1.50421	-1.64695	3.01742	-0.895687	-1.59003	-0.299681	4.10831	-1.40019	-0.709725	-1.68781	1.29964	-1.5912	-0.878027	-1.39765	3.49786	-1.2248
hsa-miR-3127-5p	2.18867	0.577851	5.55321	2.70318e-07	1.57942e-06	6.0786	UP	-1.17735	-1.61738	-1.58516	-1.57134	3.03221	-1.2376	-1.55063	-1.52546	-0.173901	0.525676	2.29651	-1.11174	-1.57285	-1.64433	-1.4164	-1.62845	-1.13091	-1.02947	-0.731505	2.46643	-1.35138	-1.04535	-0.792648	-1.55614	-0.862626	-1.02774	-1.50421	0.968879	2.26218	4.9073	-1.59003	-0.299681	-1.64229	-1.40019	1.45715	1.95035	-1.47576	-1.5912	-0.878027	-1.39765	-1.4982	2.36484
hsa-miR-3130-5p	1.53928	3.17603	4.26154	4.90625e-05	0.000181615	1.04365	UP	1.07318	4.06599	5.14043	4.69985	4.51246	3.91457	2.00985	4.22813	3.31723	2.57919	3.71875	2.88124	4.09043	2.8933	4.46897	0.780802	4.05491	-1.02947	2.34807	0.0965275	-1.35138	-1.04535	4.21604	-1.55614	-0.862626	-1.02774	4.46897	2.5269	3.44482	-0.895687	2.97604	-0.299681	-0.141538	2.49751	4.86852	4.64236	3.34268	2.28507	4.33309	-1.39765	2.97371	5.39673
hsa-miR-3132	1.61841	2.35684	3.37704	0.00107563	0.00297947	-1.88356	UP	2.97604	4.26919	-1.58516	-1.57134	3.04401	-1.2376	-1.55063	3.99593	4.32888	4.13491	5.00421	-1.11174	2.34397	2.36929	1.81212	4.82981	3.6039	-1.02947	0.134835	-1.66996	-1.35138	-1.04535	4.88078	-1.55614	-0.862626	4.4536	4.81346	4.99974	4.68454	-0.895687	-1.59003	-0.299681	-1.64229	3.93314	4.93536	4.34136	2.0332	0.658231	-0.878027	2.43436	2.64216	5.10032
hsa-miR-3138	1.20243	-0.0162492	3.35551	0.00115292	0.0031662	-1.94843	UP	3.49786	-1.61738	-1.58516	1.9853	2.90998	-1.2376	-1.55063	3.27738	-1.67249	2.06927	-1.30103	-1.11174	0.503967	-1.64433	-1.4164	-1.62845	-1.13091	-1.02947	3.23829	3.2034	-1.35138	-1.04535	-0.792648	-1.55614	-0.862626	-1.02774	2.86312	-1.64695	-1.48952	-0.895687	-1.59003	-0.299681	-1.64229	-1.40019	-0.202989	-1.68781	-1.47576	-1.5912	-0.878027	-1.39765	1.36319	-1.2248
hsa-miR-3139	-1.01599	-0.509045	-2.63001	0.0100104	0.0208753	-3.93613	DOWN	-1.74038	-1.61738	-1.58516	-1.57134	-0.79989	4.00668	5.80779	2.13904	2.98839	-1.74038	-1.30103	-1.11174	-1.57285	-1.64433	2.19831	0.243676	-1.13091	4.11024	-1.34962	-0.813824	-1.35138	-1.04535	-0.792648	0.671527	-0.862626	-1.02774	-1.50421	2.44545	-1.48952	3.67391	1.42591	-0.299681	0.671527	-1.40019	-1.48671	-1.68781	-1.47576	-1.5912	3.91457	-1.39765	2.44946	-1.2248
hsa-miR-3144-5p	1.67873	2.32593	3.76035	0.000298136	0.00093601	-0.675697	UP	-1.64695	1.65871	-1.58516	4.04287	1.90284	-1.2376	4.41776	-1.52546	-0.952868	3.27034	3.41444	3.71705	3.44238	-1.64433	-1.4164	-1.62845	3.26537	-1.02947	4.35658	-0.0918462	3.77166	-1.04535	4.00015	4.11515	-0.862626	4.9073	4.04895	1.70463	3.84295	-0.895687	0.430132	-0.299681	-1.64229	3.78005	3.65096	4.77593	4.07065	4.73251	-0.878027	-1.39765	-1.4982	3.37599
hsa-miR-3145-5p	1.39435	-0.0605392	4.23275	5.46197e-05	0.000198723	0.940878	UP	-1.74038	2.04287	0.584758	1.67341	1.12566	-1.2376	-1.55063	-1.52546	-0.887582	-1.55933	-1.30103	-1.11174	-1.57285	-0.574088	-1.4164	-1.62845	-1.13091	-1.02947	-1.68431	1.39509	3.12209	-1.04535	-0.792648	-1.55614	-0.862626	-1.02774	1.68984	-1.64695	-1.48952	-0.895687	-1.59003	-0.299681	-1.64229	-1.40019	-0.496077	2.0332	-1.47576	-1.5912	-0.878027	-1.39765	-1.4982	-1.2248
hsa-miR-3150a-3p	-1.14707	4.49264	-4.63261	1.1864e-05	4.98055e-05	2.40848	DOWN	4.72855	4.73251	4.86136	4.74888	4.25675	5.97295	5.64678	4.51676	5.79908	4.9768	5.19348	4.9579	5.86246	6.11156	6.02186	4.03866	5.11943	5.75765	6.16264	4.30556	5.8715	4.83758	5.18959	1.01853	4.5814	5.32384	5.47725	5.95946	5.12604	5.28078	5.08945	-0.299681	4.54232	5.25724	5.97295	5.17936	5.3172	6.72852	5.56684	5.90878	4.10071	6.12799
hsa-miR-3150b-3p	1.6918	0.562455	4.11535	8.422e-05	0.000298376	0.526728	UP	3.7693	0.806187	3.29504	-1.57134	3.91457	-1.2376	-1.55063	-1.52546	1.48918	3.46926	-1.30103	-1.11174	-1.57285	-0.383352	-1.4164	-1.62845	-1.13091	-1.02947	-0.522769	-1.66996	2.56656	-1.04535	-0.792648	2.15442	-0.862626	-1.02774	-1.50421	-1.64695	-1.48952	-0.895687	-1.59003	-0.299681	4.32888	-1.40019	1.29964	-0.526824	-1.47576	-1.5912	-0.878027	-1.39765	-1.4982	-1.2248
hsa-miR-3151-3p	2.16377	3.82142	5.67677	1.58827e-07	9.5185e-07	6.59762	UP	3.84101	6.16264	2.19831	4.6246	4.96005	4.73932	3.11287	-1.52546	2.13704	1.65871	5.29882	4.73251	4.49146	3.47727	4.43565	4.64236	-1.13091	-1.02947	1.525	0.345352	3.31462	-1.04535	-0.792648	4.85412	-0.862626	4.03866	-1.50421	4.34893	-1.48952	-0.895687	3.75333	-0.299681	3.9477	4.17942	5.13671	5.046	3.89466	3.09469	-0.878027	4.79463	4.53457	4.05682
hsa-miR-3153	-1.70683	3.81747	-6.19914	1.59192e-08	1.11871e-07	8.84874	DOWN	5.4611	4.61673	3.70569	3.82077	4.73251	4.57736	1.84452	5.26281	3.34549	5.54723	4.86852	5.33938	5.98767	5.3218	5.68357	5.73312	5.77757	5.13188	2.52427	6.73938	3.70231	3.02974	4.32516	5.37645	3.80497	5.2304	5.13857	5.39167	1.87164	3.38511	4.74147	-0.299681	4.9221	4.76751	4.96342	4.68812	5.12796	2.88124	5.76473	5.78769	4.91949	5.63388
hsa-miR-3155a	-1.75043	2.11088	-3.89105	0.000188722	0.000623002	-0.241972	DOWN	1.88126	-1.61738	-1.58516	0.825489	4.30164	4.07912	2.65031	2.89663	2.18501	3.62726	4.75389	-1.11174	4.6141	3.07019	5.1473	5.12796	4.85873	4.81548	4.12466	-0.173901	-1.35138	4.93536	4.99331	3.49273	-0.862626	4.93941	2.17582	5.25724	3.47162	6.47399	3.85591	5.95613	3.95755	-1.40019	0.518264	2.58927	-1.47576	5.46637	4.51676	2.65031	2.94416	4.54855
hsa-miR-3155b	1.21841	0.488849	3.23492	0.00169154	0.0044429	-2.30584	UP	-0.310407	0.541484	0.554286	-1.57134	2.20943	-1.2376	-1.55063	3.73816	0.267615	0.0172363	3.40886	-1.11174	-1.57285	-0.484044	-1.4164	0.336126	-1.13091	-1.02947	0.823099	4.22433	6.56463	-1.04535	-0.792648	-1.55614	-0.862626	-1.02774	2.31609	-1.64695	-1.48952	-0.895687	-1.59003	-0.299681	-1.64229	-1.40019	-1.72575	-0.67044	1.53476	-1.5912	-0.878027	-1.39765	-1.4982	-1.2248
hsa-miR-3156-3p	1.89763	3.41893	5.28011	8.59286e-07	4.47981e-06	4.95201	UP	1.61354	4.56605	-1.58516	3.98303	2.92925	-1.2376	3.64257	1.8567	3.66092	4.25675	2.35237	3.31723	2.13503	5.39673	-1.4164	1.28122	-1.13091	4.93288	3.89069	3.23829	-1.35138	-1.04535	-0.792648	1.19009	4.7452	4.10071	4.91689	4.27324	4.37741	5.4112	2.90536	-0.299681	2.57453	2.99526	4.72469	3.53471	4.10271	-1.5912	-0.878027	5.29882	4.14745	5.3505
hsa-miR-3156-5p	-1.34901	4.29753	-3.57579	0.000559133	0.00165609	-1.2695	DOWN	5.4454	5.56967	4.37348	6.21351	4.66785	6.41637	7.11367	6.27774	6.25937	5.60142	5.78769	3.21173	5.62874	4.38655	7.17757	5.59032	6.23286	4.96342	5.77445	5.17936	4.763	-1.04535	-0.792648	-1.55614	5.37645	5.62254	6.32925	5.99582	6.17856	-0.895687	5.15436	-0.299681	3.05803	6.19291	6.07618	5.56684	5.89443	6.27005	5.21185	6.20973	5.82398	6.62673
hsa-miR-3160-5p	-2.74646	6.85754	-6.94745	5.22427e-10	4.82024e-09	12.2064	DOWN	7.70108	6.51586	6.90479	2.98621	5.28542	8.34714	6.44729	7.03478	7.50175	9.73687	5.39673	3.64677	5.97295	6.31806	5.58468	7.33187	4.39029	8.77752	7.42968	7.37975	8.14455	10.2552	8.9811	7.46724	5.53677	6.50222	9.35637	8.62567	8.58736	7.33187	11.4553	6.80151	10.4497	8.14455	6.31451	11.1624	8.20935	11.5659	11.1624	11.4553	7.45669	11.6541
hsa-miR-3161	1.073	0.857765	2.42414	0.0173021	0.0335277	-4.42543	UP	-0.709725	3.56602	-1.58516	4.86626	0.0519286	-1.2376	-1.55063	-1.52546	2.86312	3.07716	-1.30103	-1.11174	1.57569	-1.64433	-1.4164	0.695846	-1.13091	4.19143	3.9372	0.370538	3.81154	-1.04535	-0.792648	1.04247	-0.862626	3.6039	-1.50421	-0.477566	-1.48952	-0.895687	5.23505	7.53713	3.04401	-1.40019	0.845703	1.2017	-1.47576	-1.5912	-0.878027	-1.39765	-1.4982	-1.2248
hsa-miR-3162-3p	1.1315	3.93155	3.36179	0.00112986	0.00311624	-1.92956	UP	4.41357	4.71235	3.90575	4.0885	4.17751	2.77787	-1.55063	2.02826	3.09825	1.35236	3.52274	4.38842	5.0237	4.60247	-1.4164	3.33942	-1.13091	5.61575	4.56165	4.02153	3.46691	5.54159	4.92427	5.22793	5.06179	5.72135	-1.50421	3.38938	3.65096	4.94938	2.60512	6.30065	5.46637	2.20291	4.36103	2.85534	-1.47576	1.37555	3.81377	1.76774	6.00901	4.65402
hsa-miR-3165	-1.09089	-0.274292	-3.02257	0.00324735	0.00789523	-2.9097	DOWN	0.356879	0.652945	-1.58516	3.21507	-1.67742	3.61108	2.46643	2.18501	-1.67249	-1.74038	-1.30103	-1.11174	1.81212	0.597286	2.16939	-1.62845	-1.13091	5.28542	-1.68431	-1.66996	-1.35138	-1.04535	-0.792648	3.01742	-0.862626	3.35285	-1.50421	1.81212	1.54078	-0.895687	1.58354	-0.299681	-1.64229	-1.40019	2.46643	-1.68781	-1.47576	3.15579	-0.878027	2.74629	-1.4982	-1.2248
hsa-miR-3166	-1.84396	0.124564	-4.40772	2.82722e-05	0.000111549	1.57253	DOWN	-1.64356	-1.61738	-1.58516	4.61673	1.9424	-1.2376	-1.55063	-1.52546	-1.1182	2.44366	-1.30103	4.69985	4.35479	2.85211	3.29834	0.737923	-1.13091	-1.02947	1.77188	-0.463714	-1.35138	4.23237	-0.792648	3.10677	-0.862626	4.31302	3.01327	1.57569	2.95949	3.85591	-1.59003	-0.299681	-0.535758	3.4337	1.23657	0.764319	3.67391	2.69224	3.59977	4.0822	-1.4982	4.7208
hsa-miR-3173-5p	3.66811	1.79125	10.4125	3.1498e-17	7.62193e-16	28.6555	UP	-1.61927	3.38938	-1.58516	-1.57134	2.00302	-1.2376	-1.55063	2.3724	-1.10101	2.97371	-1.30103	-1.11174	2.20943	-1.64433	2.12038	0.877253	-1.13091	-1.02947	-1.68431	3.0089	4.64627	4.61673	-0.792648	-1.55614	-0.862626	-1.02774	-1.50421	0.246505	-1.48952	-0.895687	-1.59003	-0.299681	-1.64229	3.92099	-0.402451	1.21649	-1.47576	-1.5912	-0.878027	-1.39765	-1.4982	-1.2248
hsa-miR-3175	2.30872	4.10374	6.01513	3.61207e-08	2.43814e-07	8.04589	UP	5.75765	2.45353	5.52245	3.01327	4.67824	-1.2376	1.00089	4.90063	5.54935	4.55407	3.70569	-1.11174	2.10057	3.97098	2.27046	3.69771	4.01956	4.51913	4.80118	-0.830527	5.62254	5.02985	-0.792648	4.72662	5.55147	-1.02774	4.71436	3.8011	3.70569	-0.895687	3.95562	-0.299681	5.15436	4.33711	3.88879	2.84316	3.55618	3.5724	-0.878027	-1.39765	4.57736	-1.2248
hsa-miR-3177-5p	2.45915	3.82697	5.63889	1.87051e-07	1.1055e-06	6.43792	UP	5.17397	4.7713	5.22174	-1.57134	5.38368	-1.2376	3.20803	0.915956	1.03246	1.67341	4.16751	6.19291	5.28078	-1.64433	-1.4164	3.08538	4.66785	4.71235	4.14745	-0.372352	-1.35138	4.12466	-0.792648	5.84947	-0.862626	5.38104	5.28925	-0.746143	4.2933	-0.895687	5.8372	-0.299681	-1.64229	4.37741	4.46897	3.66754	3.84709	7.1314	-0.878027	4.47346	-1.4982	3.69771
hsa-miR-3179	-1.28814	-0.63335	-3.91552	0.000173053	0.00057948	-0.159593	DOWN	-0.340154	-1.61738	-1.58516	-1.57134	-1.67742	-1.2376	2.99292	-1.52546	-1.67249	-0.769275	-1.30103	-1.11174	1.76451	-0.508407	-1.4164	-1.62845	-1.13091	-1.02947	3.39914	-1.66996	3.77588	-1.04535	-0.792648	-1.55614	-0.862626	-1.02774	4.77593	3.79535	-1.48952	-0.895687	2.73627	-0.299681	2.13149	4.19498	2.70235	0.780802	1.3909	4.54232	-0.878027	-1.39765	-1.4982	-1.2248
hsa-miR-3180	1.29537	8.45679	14.5298	1.53433e-25	1.87407e-23	47.6459	UP	8.44376	8.53147	7.76955	7.70108	8.5151	7.57286	7.26191	7.79764	7.96987	7.61325	7.70807	8.22365	8.14455	7.52593	7.52593	7.56689	8.1753	8.22365	7.63946	8.0401	7.85325	7.03478	8.73948	8.77752	8.09047	7.71505	7.35304	7.54841	6.76149	7.04703	7.89342	8.42824	8.05433	8.28464	7.79764	7.96987	8.0401	7.5137	7.49043	7.26191	8.06129	7.50175
hsa-miR-3180-5p	2.40095	3.55772	6.21563	1.47856e-08	1.04477e-07	8.92118	UP	4.19498	-1.61738	3.22955	4.31731	4.79222	5.22174	4.03693	3.40677	3.82644	2.59251	3.96655	5.12992	4.07434	-1.64433	4.83376	3.44482	-1.13091	-1.02947	3.21841	-1.66996	3.48763	-1.04535	4.33309	-1.55614	-0.862626	-1.02774	-1.50421	0.903571	4.65613	-0.895687	3.84502	-0.299681	3.71041	2.64662	3.12984	4.24392	4.13491	4.69038	-0.878027	4.96582	2.79251	3.30163
hsa-miR-3183	-1.09926	-0.561623	-2.89949	0.00467481	0.0108148	-3.24435	DOWN	-1.62385	-1.61738	2.10798	-1.57134	-0.218962	3.54051	-1.55063	1.62097	-0.817319	2.45353	-1.30103	-1.11174	-1.57285	-1.64433	-1.4164	-1.62845	-1.13091	-1.02947	1.41143	7.72068	-1.35138	-1.04535	-0.792648	0.655588	-0.862626	2.93238	-1.50421	-1.64695	-1.48952	3.65654	-1.59003	-0.299681	0.353681	-1.40019	-1.72575	4.53457	-1.47576	-1.5912	4.93041	-1.39765	4.94763	-1.2248
hsa-miR-3184-3p	2.63543	3.10571	6.45273	5.07255e-09	3.99114e-08	9.97104	UP	0.435341	3.7888	5.02788	2.8933	3.52029	-1.2376	-1.55063	4.01081	-1.67249	1.03246	-1.30103	-1.11174	-1.57285	0.677396	5.19915	0.627286	5.35727	4.00496	3.3567	-1.66996	3.35058	-1.04535	-0.792648	4.7208	3.87505	5.24823	1.72682	4.64818	1.73879	3.51096	3.67823	-0.299681	2.3724	3.75724	5.4611	4.41566	4.80317	3.83696	-0.878027	-1.39765	-1.4982	-1.2248
hsa-miR-3184-5p	3.38013	6.62668	16.7469	1.13988e-29	1.94919e-27	57.0609	UP	5.61329	4.41776	5.60142	4.66785	5.3218	3.82847	4.32888	5.59032	5.7392	6.22513	6.14541	6.34908	5.13188	6.20973	5.55147	5.45105	6.46538	6.14173	4.31928	5.44823	5.14921	3.54051	4.69985	6.68604	6.00333	2.7889	5.30546	5.93112	2.51805	4.09587	2.72903	-0.299681	5.96966	5.48507	5.0237	5.95946	5.27812	4.1634	6.0153	4.73716	5.56173	5.2442
hsa-miR-3188	1.25266	6.21368	5.98877	4.05889e-08	2.68326e-07	7.9317	UP	5.60716	7.03478	4.77821	6.58145	6.5462	5.16414	0.853209	5.66429	5.47952	6.15278	6.13509	6.00333	5.84262	4.42716	5.79052	6.0524	6.19291	6.00333	5.8104	6.08343	5.67074	5.14538	6.5203	6.79257	5.84947	5.86836	5.54723	5.89963	3.92915	5.46881	6.08343	-0.299681	5.96966	6.57651	6.4928	5.8715	5.56684	5.20735	5.74471	4.87295	6.04465	5.98073
hsa-miR-3189-5p	1.48826	1.17431	3.48724	0.000750604	0.00213922	-1.54641	UP	-1.62187	3.56989	-1.58516	2.16792	-1.67742	-1.2376	-1.55063	-1.52546	-1.67249	0.992874	-1.30103	-1.11174	-1.57285	1.32944	-1.4164	0.0251758	-1.13091	-1.02947	2.91423	-1.66996	2.99975	3.59531	4.02559	2.33874	-0.862626	4.08657	4.26726	1.78054	3.72325	4.48286	1.21255	-0.299681	2.06241	-1.40019	3.74453	2.71973	-1.47576	-1.5912	-0.878027	-1.39765	3.71875	-1.2248
hsa-miR-3190-3p	1.28947	2.70613	3.0613	0.00288961	0.00712677	-2.80206	UP	0.293604	-0.00452747	1.59166	4.66341	3.47162	3.12984	-1.55063	4.9221	-0.516484	3.38725	-1.30103	-1.11174	-1.57285	2.68052	3.76212	1.23001	4.64818	-1.02947	1.0534	1.55464	-1.35138	-1.04535	3.89897	4.21405	-0.862626	3.90121	3.02726	3.83696	1.73879	4.87295	-1.59003	5.32587	3.13454	2.77787	4.10271	3.22432	3.69567	-1.5912	3.41834	2.69412	4.32125	-1.2248
hsa-miR-3190-5p	1.81224	1.10473	4.68402	9.69548e-06	4.11823e-05	2.60323	UP	1.30253	0.395945	-1.58516	-1.57134	1.39509	-1.2376	2.45353	-1.52546	2.90266	-1.74038	-1.30103	-1.11174	2.11468	-1.64433	-1.4164	1.44651	-1.13091	5.01312	0.0268077	2.11035	-1.35138	-1.04535	-0.792648	-1.55614	-0.862626	-1.02774	-1.50421	2.38257	-1.48952	5.39673	-1.59003	-0.299681	-0.154703	-1.40019	2.71412	-1.68781	-1.47576	-1.5912	-0.878027	-1.39765	2.7853	4.54232
hsa-miR-3191-5p	3.03583	2.05407	8.29654	8.72855e-13	1.17835e-11	18.5187	UP	0.475736	2.27422	-1.58516	2.56184	1.76451	-1.2376	-1.55063	-1.52546	-1.67249	2.76234	-1.30103	3.36826	-1.57285	5.39167	-1.4164	2.11252	-1.13091	-1.02947	1.87897	0.0284396	-1.35138	6.02186	-0.792648	-1.55614	4.15141	-1.02774	3.25823	1.97094	4.22433	-0.895687	-1.59003	-0.299681	-1.64229	2.67757	3.33942	0.604099	2.5642	-1.5912	-0.878027	-1.39765	3.02289	-1.2248
hsa-miR-3192-3p	2.62845	2.3183	6.0342	3.31952e-08	2.24659e-07	8.1286	UP	-0.146352	-1.61738	-1.58516	4.63338	3.08132	-1.2376	-1.55063	1.54892	-1.67249	-0.891538	-1.30103	4.11366	2.88748	1.69718	-1.4164	3.21507	-1.13091	-1.02947	2.40107	-1.66996	-1.35138	-1.04535	4.46007	-1.55614	-0.862626	-1.02774	2.8402	4.2812	3.99358	-0.895687	-1.59003	-0.299681	3.49529	3.38007	4.64236	4.08066	2.13149	2.30168	-0.878027	4.37348	-1.4982	-1.2248
hsa-miR-3192-5p	-3.46715	1.58572	-7.78822	9.95802e-12	1.13521e-10	16.1124	DOWN	4.26919	4.43089	3.79351	4.95114	3.87505	-1.2376	3.55618	5.29882	3.67007	5.60716	-1.30103	-1.11174	5.63388	5.49575	4.69985	5.33938	4.99551	-1.02947	4.55407	4.00323	2.50951	-1.04535	-0.792648	2.3339	-0.862626	4.8988	5.10032	8.0401	4.32888	-0.895687	2.92265	-0.299681	0.652945	3.8232	5.12992	2.32436	5.56173	4.33309	3.62726	5.62874	4.15141	3.84502
hsa-miR-3194-3p	-4.01534	6.67904	-11.0613	1.397e-18	4.11875e-17	31.747	DOWN	7.91726	6.66565	7.92502	7.37975	6.2422	8.79879	9.14214	8.12968	9.64725	9.56193	7.89342	6.53796	6.40753	7.7263	6.59696	7.68901	7.41711	7.33187	9.35637	5.8372	7.35304	9.21022	8.26824	8.60658	7.67475	11.2585	13.5022	9.53385	11.1223	8.50716	7.70108	8.06824	6.12347	12.3666	10.2119	7.51982	8.79879	8.12968	7.29533	7.34266	10.2119	8.06824
hsa-miR-3194-5p	1.91753	5.03848	6.90789	6.27716e-10	5.68937e-09	12.0257	UP	5.10547	4.05682	4.9791	3.94568	5.08338	5.20735	3.56125	4.53457	6.02529	5.38632	4.47863	5.48835	5.46881	4.98921	4.51676	4.87295	4.56605	3.38007	4.71235	-1.66996	4.93941	-1.04535	5.86246	5.4162	4.05682	3.81834	5.49879	5.61023	5.60142	3.78465	4.23237	-0.299681	2.18005	3.34831	4.48286	5.24823	5.46374	1.92615	6.81018	5.28542	1.96377	5.06179
hsa-miR-3198	1.41936	1.37221	3.16193	0.00212367	0.00545267	-2.51713	UP	1.41648	2.31346	-1.58516	-1.57134	-1.67742	-1.2376	4.21205	-1.52546	-1.67249	3.08132	-1.30103	4.0404	-1.57285	-1.64433	-1.4164	4.07434	-1.13091	-1.02947	0.281231	3.63779	-1.35138	-1.04535	-0.792648	-1.55614	-0.862626	3.34831	-1.50421	3.12784	4.28789	-0.895687	3.12209	-0.299681	-1.64229	2.73627	4.56421	2.53962	1.73879	5.87464	-0.878027	3.22955	-1.4982	3.86085
hsa-miR-32-3p	-1.45204	0.139462	-3.66753	0.000410067	0.00124624	-0.977118	DOWN	-1.69027	0.139429	2.18501	-1.57134	1.83481	2.42704	2.26453	1.42591	-1.67249	-0.623967	2.36133	-1.11174	-1.57285	-0.0295495	2.69941	5.03182	-1.13091	-1.02947	1.65227	2.87597	-1.35138	4.00668	-0.792648	-1.55614	-0.862626	2.92525	-1.50421	4.0822	-1.48952	-0.895687	-1.59003	-0.299681	-0.438912	1.88575	2.00758	-0.586066	3.1657	3.09825	-0.878027	4.9579	-1.4982	4.40391
hsa-miR-32-5p	-2.29217	0.700961	-4.65371	1.09225e-05	4.61553e-05	2.48824	DOWN	-0.414951	-1.61738	4.2996	3.2034	2.35893	-1.2376	4.6141	-1.52546	3.23526	1.89469	-1.30103	3.87505	-1.57285	3.66092	-1.4164	3.86333	4.26109	3.11287	3.75724	5.07916	2.58203	4.24223	-0.792648	3.81834	-0.862626	3.80931	-1.50421	1.95035	1.75144	5.70221	-1.59003	5.68357	8.82188	-1.40019	-1.2016	1.64879	-1.47576	-1.5912	5.10032	3.70569	3.15406	-1.2248
hsa-miR-3200-5p	1.14886	0.107231	2.98998	0.00357986	0.00857629	-2.99944	UP	-1.72013	-1.61738	5.4162	-1.57134	-1.67742	-1.2376	-1.55063	-1.52546	-1.67249	-0.221286	-1.30103	-1.11174	-1.57285	1.66545	3.64677	-1.62845	-1.13091	-1.02947	-0.886055	-1.66996	-1.35138	-1.04535	-0.792648	4.40821	-0.862626	-1.02774	-1.50421	1.50096	-1.48952	-0.895687	-1.59003	-0.299681	-1.64229	-1.40019	-0.790951	2.19831	2.42502	-1.5912	-0.878027	-1.39765	-1.4982	-1.2248
hsa-miR-320a	-1.46762	5.85633	-10.9329	2.58264e-18	7.12308e-17	31.1372	DOWN	6.61624	5.93112	5.85651	6.77241	6.20973	7.30541	6.97477	6.55022	6.89941	5.87464	5.53091	5.61575	7.21278	7.3918	5.62874	6.27774	6.31105	6.33999	6.64488	5.60716	6.77241	6.99204	6.35714	6.50222	7.09342	5.78281	7.96117	6.87915	6.68604	7.20242	6.83223	7.34266	8.48088	5.50154	6.16264	6.5203	6.11895	6.80151	6.73938	6.0678	6.63545	6.7496
hsa-miR-320b	-1.9495	5.12399	-12.6892	6.47946e-22	3.32397e-20	39.3651	DOWN	6.38135	4.93941	5.87819	6.25937	5.48179	5.68357	5.61821	5.95946	6.21351	6.23286	4.84196	5.13857	6.4928	7.61325	6.40753	6.70667	6.28467	4.65613	6.65519	5.95946	5.75765	6.26471	5.53091	6.05657	6.7496	6.00333	7.5137	6.32162	6.27005	6.23286	4.93288	6.72852	7.76955	5.26743	6.23286	6.12799	5.96637	5.11943	6.59696	6.0153	6.10435	6.32925
hsa-miR-320c	-1.73431	3.74879	-4.70346	8.98016e-06	3.85186e-05	2.67722	DOWN	5.43067	4.91689	4.78377	5.75765	4.053	6.34908	0.93522	4.72855	5.4186	4.46007	4.0404	4.85642	5.60429	6.78738	5.4162	5.61821	5.39167	-1.02947	5.82398	4.32888	5.65526	6.07618	4.51676	1.95998	5.30804	4.74888	6.95922	5.55667	5.26281	-0.895687	4.64627	-0.299681	7.1661	4.22029	6.0373	4.82981	3.95562	4.63573	5.48835	4.72469	5.50931	5.47725
hsa-miR-320d	-2.16256	2.76384	-4.4661	2.26188e-05	9.05368e-05	1.78698	DOWN	5.45567	4.02768	5.46637	4.96005	4.9746	2.64439	3.7888	-1.52546	5.20349	-0.806912	-1.30103	-1.11174	5.23948	5.14538	4.15141	2.1637	-1.13091	-1.02947	5.71452	4.353	4.91689	5.78281	6.17014	5.87464	6.0678	3.62726	6.86066	5.12796	3.81834	5.86246	4.82802	-0.299681	7.49609	4.36964	4.30164	3.11998	4.57736	-1.5912	5.61329	3.86581	5.28925	5.07002
hsa-miR-320e	-3.68298	2.84217	-9.37316	4.79948e-15	8.60885e-14	23.6711	DOWN	5.85948	4.81749	2.31082	2.20291	4.78377	6.53796	6.63545	5.02788	4.98921	3.92504	2.45149	-1.11174	5.14538	6.38135	5.30804	5.65827	3.62309	-1.02947	5.99582	5.1173	5.39673	4.9768	3.95755	2.70529	3.61108	4.04535	6.76149	5.53091	6.21729	3.59038	5.39673	-0.299681	6.60634	5.07468	5.62254	5.4237	5.04095	5.67738	4.82203	5.92056	4.91247	5.1869
hsa-miR-324-5p	-1.32641	0.717838	-2.80872	0.00607562	0.0136104	-3.48372	DOWN	-0.231379	-1.61738	1.47624	1.59796	2.61616	3.48321	5.50931	4.36964	2.5642	3.98303	4.26321	4.3036	1.76774	0.557214	-1.4164	-1.62845	-1.13091	-1.02947	-0.127451	0.774725	3.07716	-1.04535	-0.792648	-1.55614	-0.862626	4.14745	4.9746	1.33897	4.13895	-0.895687	4.13693	-0.299681	-1.64229	4.353	0.170846	4.26109	-1.47576	5.33051	5.33492	3.96854	1.18685	-1.2248
hsa-miR-326	1.37872	3.62063	3.76057	0.000297911	0.00093601	-0.674981	UP	4.77593	4.23631	0.545066	5.11037	4.62696	3.33615	2.77787	3.14779	3.77377	3.9372	5.4264	5.83114	3.51096	5.79908	-1.4164	2.25984	4.39456	4.42279	1.76223	4.33711	4.94763	-1.04535	-0.792648	4.23434	4.90246	-1.02774	-1.50421	4.01956	4.20456	-0.895687	-1.59003	6.00901	4.89205	3.32137	4.79703	3.76212	1.82436	4.00875	-0.878027	3.2886	4.65205	4.20836
hsa-miR-328-3p	1.13052	4.59827	3.77985	0.000278652	0.000882398	-0.611687	UP	5.15884	5.26743	-1.58516	4.32888	4.42279	3.52274	2.92925	5.04095	4.12681	4.57232	5.01521	5.45105	4.93041	4.49475	4.7043	5.05182	3.55346	4.41357	4.41776	7.28287	4.96005	-1.04535	4.74147	5.72797	5.46637	4.52151	4.93041	4.26919	-1.48952	-0.895687	5.25045	-0.299681	5.57881	4.09829	5.09192	4.90246	4.32888	3.9517	4.68812	4.30914	3.19436	3.33179
hsa-miR-329-5p	1.10783	0.43123	2.3666	0.0200511	0.0378727	-4.55592	UP	-1.6454	-0.025489	4.27324	1.52004	1.27837	2.71721	-1.55063	1.47052	6.53796	-0.269	2.97371	-1.11174	-1.57285	1.75786	1.82996	-1.62845	-1.13091	-1.02947	-1.68431	-1.66996	-1.35138	-1.04535	-0.792648	3.07924	-0.862626	-1.02774	-1.50421	-1.64695	-1.48952	-0.895687	0.968879	-0.299681	2.4051	-1.40019	-1.4549	-1.68781	-1.47576	-1.5912	-0.878027	-1.39765	-1.4982	-1.2248
hsa-miR-330-5p	2.20197	1.07583	5.2854	8.40459e-07	4.39955e-06	4.97355	UP	-1.08909	3.96113	1.93035	-1.57134	-0.269	-1.2376	1.86618	-1.52546	-0.335374	-1.74038	3.60931	-1.11174	-1.57285	1.76981	-1.4164	0.918231	-1.13091	-1.02947	4.04715	-1.66996	-1.35138	-1.04535	-0.792648	2.25239	-0.862626	-1.02774	-1.50421	0.68022	-1.48952	-0.895687	-1.59003	5.72797	-1.64229	-1.40019	-1.54982	2.94735	2.66055	-1.5912	-0.878027	3.40192	-1.4982	-1.2248
hsa-miR-337-5p	-1.16466	-0.139381	-3.07737	0.00275214	0.00682193	-2.75705	DOWN	3.07716	-1.61738	3.98509	-1.57134	-0.88911	-1.2376	-1.55063	1.58354	0.630736	-1.74038	2.46383	-1.11174	-1.57285	-0.224989	-1.4164	3.59285	3.8836	-1.02947	-0.366604	2.10057	4.91247	-1.04535	-0.792648	3.22432	-0.862626	3.65096	-1.50421	-1.64695	-1.48952	-0.895687	-1.59003	-0.299681	3.81834	1.73373	-1.72575	1.38336	-1.47576	-1.5912	-0.878027	2.99526	4.48286	-1.2248
hsa-miR-339-3p	-1.71526	-0.111079	-4.04862	0.000107375	0.000373699	0.294896	DOWN	4.29157	2.63763	-1.58516	0.568368	1.46197	-1.2376	3.86581	-1.52546	-1.67249	-0.0387527	5.48507	2.8402	4.69265	-1.64433	3.70569	4.22029	-1.13091	-1.02947	1.95322	-1.66996	-1.35138	4.86852	4.65009	-1.55614	-0.862626	3.98714	2.71102	-1.64695	-1.48952	3.21507	-1.59003	-0.299681	-1.64229	-1.40019	3.30163	0.884714	-1.47576	-1.5912	-0.878027	3.7401	-1.4982	4.04535
hsa-miR-33a-5p	-1.14166	0.173792	-2.54802	0.0124931	0.025352	-4.13514	DOWN	-0.781187	1.54892	1.77612	-1.57134	4.57736	4.54232	3.62518	-1.52546	-1.67249	0.610495	2.68346	-1.11174	1.62288	0.503967	-1.4164	4.7713	3.2562	4.36532	1.99477	4.83758	-1.35138	-1.04535	-0.792648	2.69941	-0.862626	-1.02774	-1.50421	-1.64695	-1.48952	5.80779	-1.59003	4.61673	3.27034	-1.40019	0.592747	-1.68781	-1.47576	-1.5912	4.26919	-1.39765	-1.4982	-1.2248
hsa-miR-33b-5p	-1.54188	0.0973276	-3.70723	0.000358015	0.00110773	-0.848858	DOWN	-1.74038	4.11905	2.11468	2.41758	-0.196703	3.71041	4.86852	-1.52546	2.79251	-0.623967	2.65293	-1.11174	-1.57285	1.56813	2.20943	4.23237	-1.13091	-1.02947	-1.68431	-1.66996	-1.35138	-1.04535	-0.792648	-1.55614	4.73251	-1.02774	2.42331	2.95949	5.37396	-0.895687	3.40469	-0.299681	0.179505	3.81377	-1.72575	3.40886	1.43631	4.2812	-0.878027	3.53761	-1.4982	-1.2248
hsa-miR-342-5p	-1.99014	5.64308	-11.8642	3.07849e-20	1.03899e-18	35.5333	DOWN	6.09126	5.76802	6.70667	6.38135	6.2501	7.62741	6.94792	7.17757	7.85325	6.35714	6.59696	5.72135	6.70667	7.56689	6.66565	7.52593	6.33999	5.89443	6.79257	4.93536	4.81548	6.81018	7.14311	7.00315	5.63388	6.46969	7.1661	6.83223	7.23842	6.17856	6.63545	6.7822	6.36137	5.28925	6.27774	6.88926	6.76149	6.65519	6.49751	7.02912	6.56463	7.15402
hsa-miR-345-5p	1.47456	1.80844	3.52646	0.000659198	0.00190196	-1.42441	UP	0.548648	0.109401	-1.58516	1.09566	1.34189	-1.2376	3.42256	-1.52546	3.2034	4.44907	3.6039	-1.11174	3.06265	5.75103	1.70463	3.29834	3.59754	3.21173	0.874269	6.32162	4.34136	3.65096	-0.792648	-1.55614	-0.862626	-1.02774	-1.50421	0.0327582	2.84613	4.44009	-1.59003	-0.299681	4.98921	-1.40019	-1.50301	2.78158	-1.47576	-1.5912	3.4337	2.94416	-1.4982	-1.2248
hsa-miR-346	1.81882	3.68542	4.60726	1.30994e-05	5.46341e-05	2.31296	UP	3.4337	4.96342	-1.58516	-1.57134	5.22793	5.18959	-1.55063	1.43053	5.54935	-1.16244	2.05687	3.59038	3.65375	4.11024	-1.4164	2.89996	-1.13091	5.00178	1.60513	2.17794	2.1264	-1.04535	3.54579	0.71633	5.2442	-1.02774	3.19902	5.28078	4.20836	3.22693	4.46007	4.5814	3.87505	3.66501	3.71535	5.09399	3.28353	4.31108	4.81346	-1.39765	3.99593	5.12604
hsa-miR-34b-5p	-2.35588	0.630076	-5.35796	6.19654e-07	3.31128e-06	5.27017	DOWN	-0.00452747	-1.61738	4.66785	4.23631	-1.67742	-1.2376	4.65009	2.86909	5.97295	4.49475	2.09311	4.81749	0.927033	2.52925	3.33615	4.85412	-1.13091	3.24926	-1.68431	2.26453	-1.35138	5.40174	-0.792648	-1.55614	3.46691	3.37069	-1.50421	0.665824	1.30542	-0.895687	2.76503	-0.299681	-0.372352	-1.40019	-1.35138	-0.510593	-1.47576	2.54218	6.36559	2.86312	4.68454	-1.2248
hsa-miR-34c-3p	1.72042	0.754848	4.25323	5.0608e-05	0.000185974	1.01394	UP	3.04167	-1.61738	-1.58516	-1.57134	-1.67742	-1.2376	-1.55063	-1.52546	2.41576	-1.59324	-1.30103	-1.11174	-1.57285	4.26109	-1.4164	1.34454	4.67213	-1.02947	-1.2718	1.75995	-1.35138	-1.04535	-0.792648	3.86814	-0.862626	-1.02774	-1.50421	1.63151	2.87597	-0.895687	-1.59003	-0.299681	2.32436	-1.40019	-0.283802	-1.68781	-1.47576	2.36929	-0.878027	-1.39765	-1.4982	3.83049
hsa-miR-3591-3p	2.00915	0.342739	5.40331	5.11678e-07	2.80439e-06	5.45662	UP	-0.440538	-1.61738	-1.58516	3.51548	-1.67742	-1.2376	1.83974	-1.52546	-1.67249	0.187637	2.90998	-1.11174	-1.57285	1.63151	-1.4164	-1.62845	-1.13091	-1.02947	-0.288165	-1.66996	-1.35138	-1.04535	-0.792648	-1.55614	-0.862626	-1.02774	-1.50421	-1.64695	-1.48952	3.54579	1.14479	-0.299681	-0.0816484	-1.40019	1.89469	-1.38491	3.99123	-1.5912	-0.878027	-1.39765	-1.4982	-1.2248
hsa-miR-3605-3p	2.98541	1.96125	7.75081	1.19003e-11	1.34468e-10	15.9364	UP	4.43565	2.74065	-1.58516	2.41395	2.95949	-1.2376	-1.55063	-1.52546	2.8933	1.7072	-1.30103	-1.11174	1.06785	1.01007	-1.4164	3.65096	-1.13091	-1.02947	-0.216637	2.61026	2.98397	-1.04535	-0.792648	4.72662	-0.862626	-1.02774	-1.50421	0.250549	-1.48952	-0.895687	-1.59003	-0.299681	-1.64229	-1.40019	1.63493	2.88748	-1.47576	-1.5912	-0.878027	-1.39765	2.75	-1.2248
hsa-miR-3606-3p	-1.14255	-0.721705	-3.11743	0.00243552	0.00615478	-2.64405	DOWN	2.06629	-1.61738	-1.58516	3.15579	-1.67742	5.07235	4.50348	1.53103	-1.67249	-1.74038	2.14205	-1.11174	-1.57285	-1.64433	-1.4164	-1.62845	-1.13091	-1.02947	-1.68431	-1.66996	-1.35138	-1.04535	-0.792648	-1.55614	-0.862626	3.61829	2.42331	0.790385	-1.48952	-0.895687	-1.59003	-0.299681	-1.64229	-1.40019	0.671527	8.91338	-1.47576	2.57635	-0.878027	-1.39765	-1.4982	-1.2248
hsa-miR-3607-5p	-1.03143	-0.797761	-3.41878	0.000939411	0.0026479	-1.75683	DOWN	-1.70156	-1.61738	-1.58516	1.76223	-1.67742	-1.2376	-1.55063	-1.52546	-1.67249	2.43171	2.54218	-1.11174	3.72325	1.27837	-1.4164	2.02624	-1.13091	-1.02947	-1.68431	-1.01638	-1.35138	-1.04535	-0.792648	-1.55614	-0.862626	4.21205	4.3036	-1.64695	1.17603	-0.895687	0.522253	-0.299681	-1.64229	-1.40019	1.16169	-1.68781	1.44651	4.18147	-0.878027	-1.39765	-1.4982	-1.2248
hsa-miR-361-3p	1.3343	3.51566	3.38588	0.00104531	0.00291753	-1.85681	UP	1.91586	4.58526	2.57453	3.71535	4.77362	4.20456	3.55074	3.92302	3.95755	0.806187	-1.30103	5.01102	-1.57285	5.03631	5.27075	3.19669	4.30556	4.11024	4.94344	3.53471	-1.35138	-1.04535	-0.792648	4.39029	-0.862626	4.66341	4.69265	3.13184	3.93314	-0.895687	2.20291	-0.299681	3.74453	3.44238	3.60755	2.00758	5.05182	5.26909	-0.878027	5.19348	3.97343	5.36714
hsa-miR-3614-3p	-1.01665	-0.626545	-2.96831	0.00381792	0.00905918	-3.05863	DOWN	-1.74038	1.36116	2.94191	-1.57134	0.71633	4.25675	2.15442	-1.52546	4.69786	-1.21507	-1.30103	-1.11174	-1.57285	-1.64433	-1.4164	4.2481	-1.13091	-1.02947	3.86814	5.51713	-1.35138	-1.04535	-0.792648	-1.55614	-0.862626	-1.02774	-1.50421	-1.64695	2.06241	-0.895687	-1.59003	-0.299681	-1.64229	-1.40019	-1.50396	0.169291	2.86909	-1.5912	-0.878027	-1.39765	2.93552	-1.2248
hsa-miR-3614-5p	1.10645	4.75028	3.85486	0.00021441	0.00069352	-0.363164	UP	3.91457	5.43067	3.12496	4.24223	5.65827	-1.2376	5.88175	-1.52546	4.353	4.06097	3.28353	3.95755	5.34389	4.57232	4.40391	3.71875	3.3259	4.26321	5.68357	3.08335	-1.35138	4.77362	4.33309	5.86246	5.4162	-1.02774	4.03866	4.40606	5.47125	3.98509	5.19348	5.11516	4.83376	4.96822	5.5043	4.81749	4.72855	4.23631	4.63338	5.01963	5.16669	5.76473
hsa-miR-3615	1.82393	2.01039	4.32174	3.91501e-05	0.00014877	1.26002	UP	2.51198	-1.61738	3.96285	2.58203	3.18133	-1.2376	-1.55063	-1.52546	1.29235	4.11515	-1.30103	-1.11174	-1.57285	0.629011	-1.4164	4.09587	-1.13091	3.95934	4.26321	4.73053	3.3567	-1.04535	4.36748	4.58526	-0.862626	-1.02774	-1.50421	-1.64695	-1.48952	-0.895687	3.70231	5.48835	1.41426	2.61026	3.10025	-1.24929	4.38416	0.604099	-0.878027	3.30163	3.62996	-1.2248
hsa-miR-3617-5p	-2.13059	0.00540641	-5.684	1.53938e-07	9.2471e-07	6.62815	DOWN	3.80497	-1.61738	-1.58516	-1.57134	4.93536	3.84502	-1.55063	3.17011	4.2933	1.32151	-1.30103	-1.11174	4.7208	2.27234	2.41576	3.01327	-1.13091	-1.02947	3.55871	3.49529	4.06097	-1.04535	-0.792648	3.08953	-0.862626	-1.02774	-1.50421	3.51096	1.43053	-0.895687	-1.59003	-0.299681	-1.64229	1.71555	-0.0295495	0.293604	-1.47576	-1.5912	-0.878027	2.5269	3.3193	-1.2248
hsa-miR-362-3p	-1.83386	0.418785	-4.01572	0.00012093	0.000416358	0.181547	DOWN	1.68531	2.99057	4.03471	4.07912	2.77279	2.42159	0.871286	2.38063	-1.67249	2.14851	6.53024	4.21205	-1.57285	-1.64433	1.93238	1.69237	-1.13091	3.14271	0.903571	0.224857	-1.35138	5.05182	4.78769	-1.55614	-0.862626	-1.02774	-1.50421	-1.64695	-1.48952	-0.895687	3.99123	-0.299681	-1.64229	-1.40019	-1.31809	-1.68781	3.16182	2.24268	-0.878027	5.59032	-1.4982	6.25474
hsa-miR-362-5p	-1.09664	1.03148	-2.3014	0.0236292	0.0437609	-4.70045	DOWN	1.33604	3.58552	-1.58516	4.67612	1.35236	4.763	3.81834	4.78769	-1.67249	0.578011	-1.30103	-1.11174	3.70569	1.83481	3.98063	2.01438	-1.13091	4.09587	-1.25247	2.12038	2.79251	5.72135	-0.792648	1.75144	-0.862626	3.42758	2.04532	3.33179	2.62788	-0.895687	1.67862	-0.299681	3.54579	-1.40019	-1.72575	4.18147	1.75144	5.2304	-0.878027	-1.39765	2.54823	-1.2248
hsa-miR-3620-3p	1.0533	3.86045	3.12273	0.00239624	0.00607948	-2.629	UP	3.52753	5.25724	3.54826	3.98714	4.72469	-1.2376	4.59998	3.98303	1.81834	4.23631	4.9073	4.76525	2.93758	-1.64433	3.50184	5.47725	4.7208	3.1657	4.65205	2.50442	4.7713	3.7972	-0.792648	2.40107	-0.862626	5.3624	4.74147	2.06629	4.55407	3.11287	4.72855	-0.299681	2.85211	5.14538	5.37645	3.76695	4.17352	3.05152	-0.878027	3.63779	3.95755	3.65873
hsa-miR-3620-5p	1.13561	7.79107	12.5456	1.26269e-21	5.78355e-20	38.703	UP	7.60037	7.78429	7.35304	7.44288	7.73944	6.61624	7.00315	7.5137	7.63946	7.14311	7.43628	8.01125	7.53713	7.2718	7.31996	7.1314	7.47827	7.83932	7.10702	7.02346	7.25001	7.07141	8.0401	7.83932	7.65835	7.26191	6.91016	6.65519	6.91016	7.12032	7.45669	5.77757	7.31996	7.47827	7.41711	7.47827	7.26191	6.85357	6.89941	6.77241	7.44288	6.93345
hsa-miR-3622a-3p	1.81611	3.35331	4.97937	2.97247e-06	1.40154e-05	3.74687	UP	3.46691	4.64627	3.41444	3.80497	3.55074	3.26537	1.81418	2.25037	4.67213	1.41648	5.19915	4.34893	2.39173	4.86136	2.73163	4.1973	-1.13091	-1.02947	-0.323736	-1.66996	-1.35138	4.54441	4.97241	1.8567	-0.862626	3.96113	4.36103	4.2812	2.15442	-0.895687	4.30914	-0.299681	2.18005	2.86312	4.21205	4.43787	2.60512	4.17352	-0.878027	4.82623	-1.4982	4.65009
hsa-miR-363-3p	-1.22598	0.763791	-2.75079	0.00716052	0.0156313	-3.63313	DOWN	-1.21507	3.31723	3.18466	3.99593	1.37555	4.60247	4.03248	-1.52546	-0.697681	2.42502	3.98714	-1.11174	5.03182	1.02696	3.27738	4.7579	-1.13091	3.19669	4.27121	0.780802	-1.35138	-1.04535	-0.792648	-1.55614	5.43558	-1.02774	1.46875	2.0332	2.45353	-0.895687	-1.59003	5.00178	3.8011	-1.40019	-1.72575	2.37869	1.66168	0.812615	-0.878027	2.12895	1.58724	-1.2248
hsa-miR-3646	1.68045	3.76366	3.87845	0.000197315	0.000645554	-0.284271	UP	4.80959	4.39029	2.20291	1.57087	5.03863	3.42256	4.92644	-1.52546	3.53471	1.92615	4.20836	4.38842	0.764319	3.24649	-1.4164	-1.62845	-1.13091	4.21604	5.38899	1.57569	-1.35138	4.91689	4.04895	2.04532	4.42027	-1.02774	4.0589	4.7694	4.49922	4.20836	0.797038	-0.299681	2.99057	4.75138	3.59531	3.7888	4.36964	1.38604	-0.878027	4.10831	1.46197	4.9221
hsa-miR-3649	2.99308	1.62997	6.79017	1.08202e-09	9.50475e-09	11.4898	UP	-0.292407	-1.61738	-1.58516	2.21446	-0.567423	3.83907	-1.55063	1.79538	3.27738	3.49786	-1.30103	-1.11174	1.74523	-1.64433	-1.4164	4.78213	3.24132	-1.02947	1.62548	5.01102	-1.35138	-1.04535	-0.792648	-1.55614	-0.862626	-1.02774	3.24132	4.19143	1.2728	-0.895687	-1.59003	-0.299681	-1.64229	-1.40019	2.88436	3.94355	-1.47576	-1.5912	-0.878027	-1.39765	-1.4982	-1.2248
hsa-miR-3650	1.80274	0.686705	3.84579	0.000221346	0.000712668	-0.393384	UP	-1.59003	-1.61738	2.38257	-1.57134	-1.67742	-1.2376	1.59397	-1.52546	-1.67249	4.053	-1.30103	-1.11174	-1.57285	-0.234308	10.5571	-1.62845	-1.13091	-1.02947	0.808703	3.74453	-1.35138	-1.04535	-0.792648	-1.55614	-0.862626	-1.02774	3.55346	-1.64695	-1.48952	4.72469	-1.59003	5.24823	-1.64229	-1.40019	-1.72575	-1.68781	-1.47576	-1.5912	-0.878027	2.63286	-1.4982	-1.2248
hsa-miR-3651	1.14513	1.31815	2.73683	0.00744702	0.0161468	-3.66873	UP	1.24681	3.23241	1.4187	-1.57134	1.78054	-1.2376	1.00652	-1.52546	3.60755	-0.72722	3.76695	-1.11174	3.62309	-0.550824	-1.4164	1.43631	3.49786	-1.02947	4.74888	-1.66996	-1.35138	-1.04535	-0.792648	4.30164	-0.862626	-1.02774	1.26745	-1.64695	-1.48952	-0.895687	2.13149	-0.299681	5.4162	3.88879	-0.30522	2.36133	3.82482	-1.5912	-0.878027	-1.39765	-1.4982	-1.2248
hsa-miR-3653-5p	1.40349	0.806237	3.19557	0.00191309	0.00496164	-2.42023	UP	0.496956	-1.61738	-1.58516	3.73177	3.54051	-1.2376	-1.55063	-1.52546	3.19902	-1.07386	2.90998	2.64662	-1.57285	-1.64433	2.20291	3.21507	4.17144	-1.02947	-1.68431	-1.66996	-1.35138	-1.04535	-0.792648	0.655588	-0.862626	-1.02774	2.30638	-1.64695	2.48315	-0.895687	1.38067	-0.299681	4.7694	-1.40019	4.34699	-0.407824	2.07667	2.73163	-0.878027	-1.39765	-1.4982	-1.2248
hsa-miR-3663-5p	2.6289	3.25471	6.73113	1.42038e-09	1.22258e-08	11.2221	UP	0.947363	1.60689	3.65375	4.01724	4.14525	-1.2376	-1.55063	0.989956	3.4523	3.02015	4.13305	-1.11174	-1.57285	-1.64433	3.07716	2.42331	-1.13091	-1.02947	3.60755	5.16414	-1.35138	4.01956	4.38655	4.79703	4.14305	-1.02774	-1.50421	4.37741	2.38257	5.73312	1.99774	-0.299681	2.16792	3.80497	3.93517	0.370538	3.78465	-1.5912	-0.878027	1.90942	2.58403	3.48763
hsa-miR-3667-3p	2.64891	0.79328	7.15272	2.0063e-10	1.94195e-09	13.1492	UP	4.21021	-1.61738	-1.58516	-1.57134	0.674571	-1.2376	-1.55063	-1.52546	-1.67249	0.336126	-1.30103	-1.11174	-1.57285	-1.64433	-1.4164	-1.62845	-1.13091	-1.02947	-1.68431	2.0332	2.59251	-1.04535	-0.792648	2.38996	-0.862626	-1.02774	-1.50421	-1.64695	-1.48952	-0.895687	-1.59003	-0.299681	2.60512	-1.40019	-1.72575	2.64662	3.38007	-1.5912	-0.878027	-1.39765	-1.4982	-1.2248
hsa-miR-367-3p	-1.63058	0.365707	-3.96954	0.000142745	0.000483674	0.0235797	DOWN	0.0724396	3.75333	2.13149	3.86085	2.92525	2.30638	2.35653	-1.52546	4.9746	-1.56473	4.33309	-1.11174	0.597286	0.00904396	-1.4164	1.47052	2.51445	-1.02947	2.10798	0.747659	-1.35138	3.1657	-0.792648	4.864	-0.862626	-1.02774	1.07318	-1.64695	-1.48952	4.1047	3.63779	-0.299681	3.63265	-1.40019	-1.72575	2.1264	1.72496	4.70207	3.64886	3.12209	1.61736	-1.2248
hsa-miR-367-5p	-1.14508	0.0917168	-2.47822	0.0150294	0.0298502	-4.30024	DOWN	0.512297	-1.61738	-1.58516	-1.57134	1.46698	4.353	1.34978	3.96854	1.02274	-1.5671	4.40821	4.22029	-1.57285	-0.202989	2.56184	2.93965	-1.13091	-1.02947	-1.68431	-1.66996	5.06179	-1.04535	5.1566	0.701912	-0.862626	3.63265	-1.50421	-0.686451	-1.48952	-0.895687	0.998341	4.91689	1.68531	4.34893	-0.466538	-1.68781	-1.47576	-1.5912	4.9768	4.59308	-1.4982	-1.2248
hsa-miR-3670	-1.75046	-0.318899	-4.67195	1.01671e-05	4.31051e-05	2.55739	DOWN	-0.533978	-1.61738	1.29964	-1.57134	-0.214022	3.58795	2.72643	-1.52546	-1.67249	3.99358	-1.30103	-1.11174	-1.57285	2.15948	2.97137	-1.62845	-1.13091	-1.02947	-1.68431	-1.66996	3.60184	-1.04535	-0.792648	0.808703	-0.862626	4.9768	4.45684	0.507143	-1.48952	3.66754	3.66501	-0.299681	-0.529462	-1.40019	-1.72575	-1.17585	2.99057	3.13725	-0.878027	4.00015	-1.4982	-1.2248
hsa-miR-3675-3p	1.24815	4.70156	4.45348	2.37401e-05	9.45547e-05	1.74046	UP	4.10831	5.56173	6.17014	5.3218	4.82623	2.95949	-1.55063	4.1047	4.25675	5.13671	4.6141	3.56602	4.80317	3.6039	-1.4164	4.11515	4.91247	4.46662	4.97031	2.43436	5.2731	4.04535	5.28078	5.83114	5.05428	5.28078	4.59748	4.14745	4.95114	4.60247	4.58954	-0.299681	4.60473	5.046	4.99974	4.65824	5.1842	3.65096	4.96005	3.28353	4.51676	5.93768
hsa-miR-3678-3p	2.34744	1.24499	5.52402	3.06266e-07	1.76533e-06	5.95682	UP	2.40717	-1.61738	-1.58516	-1.57134	2.57271	-1.2376	2.10562	-1.52546	-1.67249	-0.971852	3.04401	-1.11174	0.665824	1.3472	-1.4164	1.2017	-1.13091	2.94191	-1.68431	1.78054	-1.35138	-1.04535	-0.792648	-1.55614	-0.862626	-1.02774	-1.50421	4.0885	-1.48952	4.69985	-1.59003	-0.299681	-1.64229	-1.40019	0.448088	3.49985	-1.47576	0.722275	-0.878027	1.93727	3.09825	3.75724
hsa-miR-3685	1.08597	0.16857	2.79716	0.00627919	0.0139689	-3.51373	UP	0.164571	-1.61738	-1.58516	1.27837	-1.67742	-1.2376	-1.55063	2.48587	-0.480044	0.370538	-1.30103	-1.11174	-1.57285	-0.427714	4.11366	-1.62845	-1.13091	-1.02947	-1.68431	-1.66996	-1.35138	6.19688	-0.792648	-1.55614	-0.862626	3.73177	1.68056	-1.64695	-1.48952	-0.895687	1.1578	-0.299681	-1.64229	-1.40019	-0.978044	0.402868	1.32708	1.26745	-0.878027	1.68757	-1.4982	-1.2248
hsa-miR-3688-5p	-3.65166	1.07328	-8.27058	9.88907e-13	1.31427e-11	18.3953	DOWN	4.49475	1.85033	1.95035	-1.57134	3.01535	4.85412	6.07618	4.20209	0.853209	2.95949	2.01438	4.65613	1.89763	0.0852912	-1.4164	5.17397	4.07065	3.72973	4.64627	-1.66996	4.76751	5.59536	-0.792648	-1.55614	-0.862626	5.89963	5.00883	4.11515	5.60716	4.99331	4.56421	4.46007	-1.64229	-1.40019	2.86312	2.07862	4.30914	6.47399	-0.878027	4.26919	3.85591	4.1756
hsa-miR-3689a-3p	1.39428	0.569799	3.49461	0.000732564	0.00209013	-1.52357	UP	2.81063	0.467604	-1.58516	-1.57134	2.16939	-1.2376	-1.55063	-1.52546	3.46926	-1.74038	-1.30103	-1.11174	-1.57285	-1.64433	-1.4164	-1.62845	-1.13091	-1.02947	4.06097	3.52274	-1.35138	3.07716	-0.792648	-1.55614	-0.862626	-1.02774	-1.50421	2.64662	-1.48952	-0.895687	-1.59003	-0.299681	1.80609	-1.40019	-1.72575	1.65871	-1.47576	-1.5912	-0.878027	-1.39765	2.79957	2.70529
hsa-miR-3689d	2.21247	3.35967	5.06006	2.13816e-06	1.0232e-05	4.06636	UP	5.16669	3.9181	2.35237	0.707022	3.72325	3.62726	5.2941	2.69035	-1.67249	-1.74038	4.69265	4.62058	4.2933	-1.64433	-1.4164	5.24621	4.88753	-1.02947	-1.68431	-1.66996	-1.35138	3.63265	4.64236	5.15436	-0.862626	-1.02774	-1.50421	4.47121	3.85591	6.19291	3.06265	5.55147	4.93041	1.89073	0.175527	1.53657	4.42279	-1.5912	5.55667	-1.39765	4.81346	5.30804
hsa-miR-369-3p	-1.0483	-0.171531	-2.59575	0.0109876	0.0226189	-4.01994	DOWN	-1.63614	0.485505	-1.58516	-1.57134	0.417297	-1.2376	4.31302	-1.52546	-0.641681	3.81377	-1.30103	-1.11174	2.73163	0.092	-1.4164	4.43089	-1.13091	-1.02947	0.208835	3.55618	3.43766	2.99975	-0.792648	4.61673	-0.862626	-1.02774	-1.50421	-0.522769	1.14479	-0.895687	-1.59003	-0.299681	4.93536	-1.40019	-1.72575	3.75724	-1.47576	-1.5912	-0.878027	-1.39765	2.57635	-1.2248
hsa-miR-369-5p	-1.52839	1.04561	-3.39991	0.000998855	0.00280928	-1.81428	DOWN	3.17466	0.726429	-1.58516	2.74629	1.70463	2.98173	5.55147	2.43436	4.23434	3.09825	3.09825	3.06265	-1.57285	3.00653	-1.4164	0.592747	-1.13091	-1.02947	1.10654	4.12079	-1.35138	-1.04535	4.27324	2.00985	-0.862626	4.73053	3.35929	1.01007	3.72769	4.82981	1.49877	7.25001	4.41357	-1.40019	1.49337	1.9853	4.78048	1.87667	-0.878027	-1.39765	5.08698	-1.2248
hsa-miR-3692-5p	3.46408	1.64653	8.66431	1.48261e-13	2.27718e-12	20.273	UP	4.0589	-1.61738	1.74834	-1.57134	-1.67742	-1.2376	-1.55063	-1.52546	-1.67249	4.2481	-1.30103	-1.11174	3.9372	-0.634209	1.96377	2.21446	-1.13091	-1.02947	0.0827912	-0.0614725	-1.35138	2.93552	-0.792648	3.54051	-0.862626	4.01081	-1.50421	-0.713846	-1.48952	-0.895687	1.80609	-0.299681	2.44545	-1.40019	2.63763	-1.68781	2.32055	-1.5912	4.64236	-1.39765	-1.4982	-1.2248
hsa-miR-3713	3.78266	1.33012	10.2188	8.01808e-17	1.86967e-15	27.7286	UP	-0.410275	-1.61738	-1.58516	-1.57134	1.04605	-1.2376	-1.55063	-1.52546	0.953407	-1.55242	-1.30103	-1.11174	0.726429	-1.64433	-1.4164	-1.62845	-1.13091	3.56364	-1.68431	0.0251758	-1.35138	-1.04535	-0.792648	1.80034	-0.862626	-1.02774	-1.50421	0.0704121	4.26919	-0.895687	-1.59003	-0.299681	2.25441	-1.40019	-1.40175	0.956104	-1.47576	2.35237	-0.878027	-1.39765	-1.4982	-1.2248
hsa-miR-3714	-2.48084	3.13569	-6.72347	1.47132e-09	1.26218e-08	11.1875	DOWN	5.93768	1.9051	5.31518	5.61329	5.39167	5.17936	1.75577	4.81749	4.0885	4.22813	3.57491	3.56989	5.68357	2.81844	4.17144	5.70793	4.72469	4.37545	6.19291	4.28985	5.39167	4.20836	4.5591	5.9344	4.07434	5.23948	5.86246	5.72135	3.27034	-0.895687	5.95946	-0.299681	5.43067	4.0404	4.7043	4.97031	5.26281	3.9517	5.08338	4.99331	5.49879	-1.2248
hsa-miR-371b-3p	2.26024	3.50871	5.55701	2.65956e-07	1.56104e-06	6.09447	UP	2.07862	4.86852	-1.58516	4.98533	3.07716	-1.2376	2.59614	-1.52546	1.9051	-0.547077	-1.30103	4.2933	3.57992	-0.0295495	2.48044	5.25267	4.9814	3.78235	4.61148	3.90575	-1.35138	-1.04535	-0.792648	4.55658	-0.862626	-1.02774	5.62254	4.61148	4.56605	-0.895687	2.29651	-0.299681	3.95368	4.29757	5.72797	3.61108	5.0237	3.42256	-0.878027	3.95562	2.99057	4.44009
hsa-miR-374c-3p	1.32064	-0.095251	3.5758	0.000559101	0.00165609	-1.26945	UP	-1.67016	-1.61738	-1.58516	-1.57134	-0.395473	-1.2376	-1.55063	-1.52546	-0.940055	3.61462	3.81834	-1.11174	-1.57285	-0.592692	2.8933	-1.62845	-1.13091	-1.02947	-1.00222	-1.66996	2.67757	-1.04535	-0.792648	-1.55614	4.03693	-1.02774	-1.50421	-1.64695	-1.48952	-0.895687	-1.59003	-0.299681	-1.64229	-1.40019	3.66754	-1.68781	-1.47576	-1.5912	-0.878027	-1.39765	-1.4982	-1.2248
hsa-miR-376c-3p	-1.11478	0.204042	-2.71335	0.00795272	0.0170844	-3.72828	DOWN	-1.5456	-1.61738	0.983374	4.83376	3.57992	4.83376	3.02726	-1.52546	4.44496	-1.35314	4.19962	-1.11174	1.87667	3.63779	1.95609	1.73626	-1.13091	-1.02947	-1.68431	-1.66996	-1.35138	4.19962	-0.792648	0.80367	-0.862626	-1.02774	-1.50421	-0.634209	3.43766	4.35658	0.610495	-0.299681	1.0143	-1.40019	-1.72575	-1.68781	-1.47576	0.799462	-0.878027	2.41395	-1.4982	4.70812
hsa-miR-377-5p	-1.25607	-0.288174	-3.25524	0.00158679	0.00420901	-2.24636	DOWN	0.197341	3.8836	1.90057	-1.57134	-1.67742	-1.2376	4.52853	-1.52546	-1.67249	0.833198	3.08953	-1.11174	-1.57285	1.41648	3.0674	-1.62845	-1.13091	-1.02947	-1.68431	-0.72722	-1.35138	3.41165	-0.792648	1.72496	-0.862626	-1.02774	-1.50421	-1.64695	-1.48952	4.73251	-1.59003	5.27075	-1.64229	-1.40019	3.2886	0.00376923	1.85033	-1.5912	-0.878027	-1.39765	2.80429	3.07924
hsa-miR-378a-3p	1.85011	0.852743	4.23369	5.4429e-05	0.000198592	0.944226	UP	4.11216	1.38336	3.46258	-1.57134	-1.67742	-1.2376	-1.55063	-1.52546	3.85591	3.08538	-1.30103	-1.11174	-1.57285	-1.64433	-1.4164	-0.242846	4.24392	-1.02947	4.47346	5.69012	3.12784	-1.04535	-0.792648	1.00652	4.68812	-1.02774	1.51813	-1.64695	-1.48952	-0.895687	-1.59003	-0.299681	-1.64229	-1.40019	0.764319	-1.68781	-1.47576	-1.5912	-0.878027	-1.39765	4.61148	-1.2248
hsa-miR-378f	2.5761	1.00913	5.75437	1.13446e-07	6.8955e-07	6.92633	UP	-1.67249	-1.61738	-1.58516	-1.57134	-1.67742	4.34893	-1.55063	-1.52546	1.78054	-0.720725	-1.30103	-1.11174	4.22433	4.7043	-1.4164	-1.62845	-1.13091	-1.02947	-1.68431	-1.66996	-1.35138	5.23273	-0.792648	-1.55614	-0.862626	3.30551	-1.50421	0.417297	-1.48952	-0.895687	1.04605	5.12604	-1.64229	-1.40019	-1.72575	-1.68781	-1.47576	-1.5912	-0.878027	2.6184	-1.4982	-1.2248
hsa-miR-379-5p	-2.92875	0.527813	-7.21145	1.5237e-10	1.50319e-09	13.4204	DOWN	1.37287	-1.61738	4.9221	2.04287	-0.0571593	-1.2376	1.34978	4.38178	2.65031	1.95803	3.39207	3.04167	0.616505	-1.64433	4.15513	5.28925	-1.13091	4.0589	3.47727	2.25984	2.39621	3.0089	-0.792648	1.07318	-0.862626	-1.02774	5.52529	5.2442	3.67823	-0.895687	4.12681	-0.299681	1.64451	3.87738	4.00496	3.43766	-1.47576	3.41834	3.98303	4.8479	-1.4982	3.77377
hsa-miR-380-3p	-1.02076	0.278848	-2.37963	0.0193968	0.0369086	-4.52662	DOWN	-0.537538	-1.61738	5.27545	-1.57134	0.0424615	4.11905	3.25412	1.51154	1.88824	-1.0491	-1.30103	-1.11174	3.62996	4.27324	-1.4164	2.95459	-1.13091	4.43787	2.41395	0.995791	-1.35138	-1.04535	-0.792648	-1.55614	3.54051	-1.02774	-1.50421	-1.64695	-1.48952	-0.895687	-1.59003	-0.299681	4.5591	1.92615	-1.55144	0.890286	2.31609	3.59977	-0.878027	-1.39765	-1.4982	4.69985
hsa-miR-381-3p	-1.3689	0.193965	-3.25961	0.00156504	0.00415563	-2.23351	DOWN	-1.59324	2.56184	-1.58516	3.8836	3.18799	-1.2376	4.59998	5.16149	-1.67249	3.15233	-1.30103	-1.11174	-1.57285	-1.64433	4.30735	0.7925	-1.13091	-1.02947	2.49751	0.0771099	-1.35138	-1.04535	-0.792648	3.7972	-0.862626	-1.02774	-1.50421	-0.621198	3.99358	-0.895687	3.72769	-0.299681	1.2728	6.58638	2.08056	0.169291	-1.47576	1.77188	-0.878027	3.0089	3.09469	-1.2248
hsa-miR-3907	-1.53257	3.27402	-3.53481	0.000641156	0.00185617	-1.39831	DOWN	4.54441	3.94973	4.70207	3.02974	4.86852	3.77166	5.23948	4.44009	-1.67249	2.25239	4.94763	5.23948	2.88124	5.47725	4.05491	5.53677	4.64818	4.763	3.97823	3.06265	3.60755	5.69608	-0.792648	2.13326	-0.862626	5.69012	4.48491	5.52529	4.91689	4.66785	5.81442	-0.299681	-1.64229	5.3693	5.16924	3.26537	5.28734	5.55667	5.84262	4.42279	5.2304	4.48696
hsa-miR-3913-5p	-1.21807	-0.67897	-3.54478	0.000620199	0.00181186	-1.36706	DOWN	-1.74038	0.456571	0.645945	-1.57134	0.092	2.88124	5.67738	4.42903	0.903571	1.83727	2.13326	-1.11174	-1.57285	1.44651	-1.4164	3.46475	-1.13091	-1.02947	-1.68431	4.09043	-1.35138	4.91247	-0.792648	-1.55614	-0.862626	-1.02774	-1.50421	-1.64695	-1.48952	-0.895687	-1.59003	5.09192	2.94416	-1.40019	-0.559132	-1.68781	-1.47576	-1.5912	-0.878027	-1.39765	-1.4982	-1.2248
hsa-miR-3919	-1.13548	0.122979	-2.88959	0.00481166	0.0110789	-3.27076	DOWN	0.365308	0.895473	4.38178	2.75584	-1.67742	-1.2376	-1.55063	-1.52546	3.89259	1.90057	-1.30103	3.10451	-1.57285	3.05152	-1.4164	0.865879	-1.13091	-1.02947	-0.450165	-1.66996	-1.35138	-1.04535	-0.792648	5.05182	4.15952	-1.02774	-1.50421	3.47445	3.53471	-0.895687	-1.59003	-0.299681	4.52853	3.76212	-1.72575	0.639451	-1.47576	4.06097	-0.878027	-1.39765	2.34807	-1.2248
hsa-miR-3920	-1.21898	-0.221114	-3.22882	0.00172424	0.00451753	-2.32365	DOWN	-0.0816484	-1.61738	4.00169	1.3909	2.65031	-1.2376	-1.55063	-1.52546	0.880984	4.13491	-1.30103	3.22955	-1.57285	1.67341	-1.4164	2.43436	-1.13091	-1.02947	-0.580934	-1.66996	3.22955	-1.04535	-0.792648	3.68813	4.50727	-1.02774	-1.50421	-1.64695	-1.48952	-0.895687	0.930846	-0.299681	3.58552	-1.40019	-1.72575	0.220374	2.77787	1.54078	-0.878027	-1.39765	3.41444	-1.2248
hsa-miR-3928-5p	2.95048	1.91964	7.56858	2.82844e-11	3.1004e-10	15.0815	UP	0.56533	0.711802	1.91809	2.42502	3.92915	-1.2376	4.78996	-1.52546	-0.500604	-1.74038	-1.30103	-1.11174	0.983374	-1.64433	-1.4164	-1.62845	-1.13091	-1.02947	0.19528	-1.66996	-1.35138	5.28078	-0.792648	2.41159	-0.862626	-1.02774	-1.50421	4.10831	-1.48952	-0.895687	-1.59003	-0.299681	-0.621198	3.1657	4.03866	4.26533	-1.47576	-1.5912	-0.878027	1.92615	-1.4982	3.16376
hsa-miR-3934-5p	-2.09656	4.00029	-5.28594	8.38555e-07	4.39856e-06	4.97576	DOWN	5.75103	4.78573	4.74888	6.12799	5.86246	4.53269	-1.55063	5.89963	5.78281	5.63388	3.94568	-1.11174	6.13509	6.43845	5.48179	5.4264	5.28542	5.6931	6.29226	6.51142	5.01102	5.53677	5.31315	5.85651	4.13895	5.98073	6.23753	5.32587	5.03631	-0.895687	6.17856	-0.299681	5.5196	5.3172	5.64678	5.79335	5.44056	4.5591	9.64725	6.15647	5.40174	4.81749
hsa-miR-3935	2.0266	0.44077	4.89229	4.22865e-06	1.93687e-05	3.4054	UP	-1.74038	-1.61738	4.73932	-1.57134	-1.67742	-1.2376	-1.55063	-1.52546	3.33615	-1.40732	-1.30103	-1.11174	-1.57285	-1.64433	3.49786	-1.62845	-1.13091	-1.02947	1.28407	1.69945	-1.35138	-1.04535	-0.792648	-1.55614	-0.862626	-1.02774	2.08978	-1.64695	-1.48952	-0.895687	3.3259	-0.299681	-0.500604	-1.40019	-0.826055	2.20617	-1.47576	-1.5912	-0.878027	-1.39765	-1.4982	-1.2248
hsa-miR-3936	-1.59679	1.32475	-3.38886	0.00103527	0.00289583	-1.84779	DOWN	3.59531	-1.61738	5.13671	5.08338	4.38178	4.62259	-1.55063	3.86814	5.11516	-0.0214286	-1.30103	-1.11174	2.25712	-1.64433	2.09311	3.76212	2.86909	-1.02947	5.14538	3.89259	-1.35138	-1.04535	-0.792648	4.82623	-0.862626	-1.02774	4.85412	5.046	2.71973	-0.895687	3.24649	-0.299681	1.07318	3.33615	2.07667	3.8797	1.95998	2.16792	3.49273	2.35653	-1.4982	-1.2248
hsa-miR-3940-3p	1.52751	3.89773	3.72756	0.000333869	0.00103929	-0.782826	UP	4.91468	4.68812	4.80516	4.22029	4.94344	-1.2376	3.85838	5.1842	4.86626	4.7713	3.97343	5.58175	3.73177	5.59032	5.46637	4.34136	5.49575	4.49146	4.15327	-0.335374	5.8879	-1.04535	-0.792648	4.35479	-0.862626	-1.02774	4.63807	3.19436	2.95053	5.20349	2.99057	-0.299681	4.52151	3.15233	4.85412	4.95344	4.91247	-1.5912	-0.878027	-1.39765	3.83049	-1.2248
hsa-miR-3940-5p	1.34943	11.3793	17.9668	7.94896e-32	1.45636e-29	61.9683	UP	11.2075	11.0266	11.354	10.8158	11.0816	10.852	10.2119	10.6306	10.8158	10.6687	10.6306	11.2585	11.1223	10.6687	10.7023	10.852	11.0816	10.7779	10.5955	10.9305	10.6306	10.2934	11.6541	10.9305	10.2552	10.7023	10.5571	10.8158	10.419	10.6687	10.5228	10.4861	10.5571	11.1223	10.5571	10.4861	10.8929	10.8929	10.419	10.7023	10.6687	10.3314
hsa-miR-3942-3p	-1.38604	-0.168207	-3.30078	0.00137361	0.00370096	-2.11194	DOWN	-1.63271	-1.61738	-1.58516	3.55618	-1.67742	-1.2376	-1.55063	3.75333	-1.67249	-1.49735	-1.30103	-1.11174	0.71633	3.72325	3.96285	-1.62845	-1.13091	4.18536	-1.68431	-0.431055	5.17936	-1.04535	-0.792648	-1.55614	-0.862626	-1.02774	-1.50421	-0.72722	3.42256	-0.895687	1.53103	-0.299681	2.76234	4.65824	-0.0816484	2.53962	-1.47576	4.0404	4.70812	2.67031	-1.4982	3.89673
hsa-miR-3943	2.08043	2.63805	5.6558	1.73894e-07	1.03489e-06	6.50913	UP	0.758319	3.87047	-1.58516	1.06078	2.88124	-1.2376	2.68346	4.24601	2.35237	-1.74038	2.74347	5.05674	2.25712	0.772418	3.52029	4.65009	-1.13091	3.78235	4.64236	-1.66996	-1.35138	-1.04535	-0.792648	4.00875	-0.862626	-1.02774	-1.50421	3.42045	3.17011	-0.895687	5.10032	-0.299681	2.43823	2.18807	3.72547	4.98533	3.54051	2.12038	-0.878027	3.72325	3.46691	2.83188
hsa-miR-3944-3p	2.60826	2.72471	6.36882	7.41881e-09	5.54788e-08	9.59777	UP	3.95368	4.27324	2.14851	4.95574	-0.72722	2.35237	-1.55063	4.06599	-0.00452747	4.38842	-1.30103	2.69676	4.71637	3.70805	-1.4164	2.96554	4.44907	-1.02947	2.27919	5.69608	-1.35138	-1.04535	-0.792648	2.45353	-0.862626	2.99057	-1.50421	4.07912	-1.48952	-0.895687	4.60247	-0.299681	3.34268	2.74629	4.88556	1.7312	1.43987	-1.5912	-0.878027	-1.39765	-1.4982	-1.2248
hsa-miR-3945	2.87632	1.73913	7.26695	1.17431e-10	1.18122e-09	13.6772	UP	1.72868	0.00904396	-1.58516	1.18685	3.02726	-1.2376	-1.55063	-1.52546	-1.67249	5.09605	2.95459	-1.11174	1.70463	-1.64433	2.6184	2.54218	-1.13091	-1.02947	3.88165	5.02788	-1.35138	-1.04535	-0.792648	-1.55614	-0.862626	-1.02774	-1.50421	0.745538	1.55674	-0.895687	4.98727	-0.299681	2.05274	-1.40019	0.903571	-1.68781	3.30551	-1.5912	-0.878027	3.40192	-1.4982	-1.2248
hsa-miR-3977	-1.54009	2.49776	-3.50281	0.00071296	0.00203646	-1.49809	DOWN	3.94568	-1.61738	3.74453	4.14305	3.34549	5.28925	4.93941	3.15881	2.71721	3.18799	2.37869	4.14943	3.75333	1.14052	3.74856	4.85873	4.82203	-1.02947	2.86084	2.3882	4.70207	5.07692	-0.792648	4.07065	4.98533	4.85412	4.56421	1.63151	5.09819	-0.895687	3.5252	-0.299681	3.73816	3.30357	2.8284	4.03248	5.11037	1.23657	-0.878027	3.93517	3.90575	5.33938
hsa-miR-410-3p	-1.01804	0.122142	-2.43353	0.0168866	0.0329636	-4.40386	DOWN	2.46123	-1.61738	4.4536	1.39509	1.58511	4.9977	3.63522	1.39509	-1.67249	-1.74038	2.61393	-1.11174	-1.57285	2.97888	-1.4164	-1.62845	-1.13091	-1.02947	3.10677	3.3193	-1.35138	-1.04535	-0.792648	-1.55614	4.12252	-1.02774	1.96187	1.74523	4.71436	-0.895687	-1.59003	-0.299681	-1.64229	1.78449	0.23044	-1.68781	4.04535	2.12038	-0.878027	2.62788	1.82436	-1.2248
hsa-miR-410-5p	1.24938	0.633575	2.57373	0.0116607	0.0238705	-4.07333	UP	3.79535	-1.61738	5.00178	6.66565	-0.30522	4.11024	5.5043	2.28507	2.0183	-0.955165	-1.30103	4.864	-1.57285	-0.0590659	2.99975	-1.62845	-1.13091	4.31302	-1.68431	-1.66996	-1.35138	-1.04535	-0.792648	-1.55614	-0.862626	-1.02774	-1.50421	-1.64695	-1.48952	-0.895687	-1.59003	-0.299681	0.170846	-1.40019	-1.53952	-1.68781	-1.47576	-1.5912	-0.878027	-1.39765	1.41648	-1.2248
hsa-miR-411-5p	-1.20195	0.0133487	-3.04422	0.00304256	0.00747526	-2.84965	DOWN	-1.44237	3.38511	0.701912	-1.57134	-0.124209	-1.2376	2.97604	-1.52546	-0.0816484	0.488418	3.312	-1.11174	1.89073	-1.64433	-1.4164	3.8836	-1.13091	-1.02947	3.51548	1.46698	-1.35138	-1.04535	-0.792648	-1.55614	4.29757	3.96854	-1.50421	-0.487692	-1.48952	-0.895687	3.96285	-0.299681	2.21975	1.77612	-1.72575	1.00652	-1.47576	-1.5912	4.19962	2.08243	2.26453	-1.2248
hsa-miR-422a	2.16037	5.43071	4.75363	7.36284e-06	3.23249e-05	2.86902	UP	6.15955	6.64488	7.79764	8.14455	4.87295	6.77241	7.42968	4.13305	5.23505	7.58608	8.3334	5.99582	5.78281	6.99204	5.45567	7.18981	7.46724	7.47827	3.41639	3.84957	4.78769	-1.04535	-0.792648	5.44056	6.25937	-1.02774	2.69941	2.0183	2.40924	3.2034	-1.59003	6.0153	4.99331	2.7853	6.32925	6.16264	1.9424	3.35929	3.84709	-1.39765	5.28542	6.56463
hsa-miR-423-3p	-1.22096	2.45916	-2.5723	0.0117056	0.0239242	-4.07677	DOWN	3.84101	2.05687	4.1171	3.84295	3.27034	5.95946	5.80779	4.37348	4.82981	1.43987	-1.30103	4.26109	4.74888	4.59748	3.98919	3.63265	3.91954	4.28789	4.41357	-1.66996	-1.35138	4.78769	-0.792648	3.55618	5.13857	-1.02774	6.16264	4.22433	-1.48952	3.39207	-1.59003	5.09605	6.36137	3.67391	0.290654	1.37019	-1.47576	4.00323	4.93941	3.80497	4.23237	5.01102
hsa-miR-423-5p	1.00315	6.74964	8.18351	1.50261e-12	1.90802e-11	17.9815	UP	6.23286	6.53024	7.12586	6.41637	6.15647	6.0524	6.09448	6.56463	5.98767	7.40465	6.98067	7.83932	6.87915	6.87915	6.52527	5.5196	6.63109	6.51142	6.42208	6.27774	6.88926	6.21351	4.71637	5.88175	5.98767	6.27005	7.08805	6.37297	5.4137	6.27005	6.24615	4.59748	6.63545	6.45619	6.43845	5.50931	6.29226	6.50222	6.70667	6.43845	6.53796	5.93112
hsa-miR-424-3p	-2.58575	0.699277	-6.23538	1.35321e-08	9.6685e-08	9.00805	DOWN	-1.62235	-1.61738	4.28985	2.40924	3.69567	2.67031	4.56605	3.38007	2.72643	1.60689	-1.30103	-1.11174	2.30168	-1.64433	2.93552	1.91809	-1.13091	-1.02947	2.92004	-1.66996	-1.35138	5.77757	-0.792648	4.763	3.60755	-1.02774	-1.50421	3.38511	2.53434	-0.895687	4.85024	-0.299681	2.24268	2.07862	1.87897	2.69224	2.98173	-1.5912	3.69771	4.0404	3.47727	4.5591
hsa-miR-425-3p	1.68806	2.55548	4.14588	7.53032e-05	0.000268268	0.633658	UP	2.57271	3.71041	3.58552	3.64677	1.72868	3.5724	-1.55063	-1.52546	5.48835	-0.920187	2.94735	3.94568	4.60247	-1.64433	3.64257	2.99526	2.69941	4.82413	-1.68431	-1.66996	1.84452	-1.04535	-0.792648	1.89469	3.45734	-1.02774	-1.50421	4.07065	3.54579	-0.895687	3.62309	-0.299681	3.97343	-1.40019	1.10126	3.62726	-1.47576	2.05274	4.00668	1.70978	3.7401	-1.2248
hsa-miR-4251	1.98655	2.32571	3.86098	0.00020984	0.000680454	-0.34271	UP	1.06078	1.32944	3.9181	4.70621	-1.67742	4.59748	2.92004	-1.52546	-1.67249	3.71875	5.33051	2.66055	4.053	0.621857	-1.4164	2.1637	4.34504	3.10677	2.74629	-1.66996	-1.35138	-1.04535	-0.792648	-1.55614	-0.862626	3.56602	3.97343	4.7579	5.08698	-0.895687	3.16376	-0.299681	-1.64229	-1.40019	2.63286	3.55074	3.64257	1.91989	-0.878027	-1.39765	-1.4982	4.82623
hsa-miR-4254	1.61594	0.366747	4.40314	2.87695e-05	0.000113181	1.55577	UP	1.72	1.91989	-1.58516	-1.57134	-1.67742	-1.2376	-1.55063	1.96377	-1.67249	-1.74038	-1.30103	-1.11174	1.54078	3.72769	-1.4164	-1.62845	-1.13091	-1.02947	3.85204	6.52527	-1.35138	-1.04535	-0.792648	-1.55614	-0.862626	-1.02774	-1.50421	0.0371758	-1.48952	-0.895687	-1.59003	-0.299681	-1.64229	-1.40019	-1.72575	-1.68781	-1.47576	4.59748	-0.878027	-1.39765	2.73163	-1.2248
hsa-miR-4258	-1.43676	9.61888	-10.1484	1.12658e-16	2.55724e-15	27.3913	DOWN	10.4861	10.2934	11.3067	10.1715	9.81192	10.7434	11.1624	10.124	10.1715	11.354	11.3067	10.9764	11.2075	11.4032	11.0266	10.7023	10.5571	10.4861	9.50516	9.23212	10.4861	9.38092	8.88636	8.91338	10.0013	8.91338	9.31216	9.92015	9.75527	10.3314	9.53385	9.00771	9.96364	10.2934	10.0864	10.4497	10.7434	10.2934	10.9305	10.7779	10.419	10.6687
hsa-miR-4259	-2.26467	5.40794	-12.2125	5.98354e-21	2.43616e-19	37.159	DOWN	6.37297	5.94475	5.98073	7.04091	6.12799	7.19612	7.08805	6.57651	6.40753	6.0524	5.97295	5.91648	6.63109	6.7496	7.35304	6.61624	6.79257	6.38911	7.34266	5.70221	5.85651	6.37297	6.13841	5.77132	5.09605	7.33187	7.27734	7.53713	6.7496	6.21729	6.98067	5.13188	5.48835	5.65225	6.47399	5.89963	6.86776	7.70108	7.41711	7.5137	6.71673	5.37146
hsa-miR-4261	-1.68452	2.75033	-4.37315	3.224e-05	0.000125677	1.44639	DOWN	3.72547	4.21405	3.74856	3.31723	5.01312	-1.2376	3.14779	4.74334	4.95574	4.31928	2.49751	-1.11174	5.13671	4.9221	4.67612	5.62874	5.24823	3.32885	4.9579	3.12209	-1.35138	4.68454	4.62058	4.59131	-0.862626	5.10032	4.55658	4.49146	1.18685	3.74856	4.46426	-0.299681	4.79222	2.64216	3.52753	5.36714	2.22623	3.71535	4.04535	4.12681	3.94568	-1.2248
hsa-miR-4265	2.39575	3.04954	5.51061	3.24317e-07	1.85686e-06	5.90098	UP	5.43558	0.827879	5.64678	-1.57134	3.69567	4.95114	-1.55063	-1.52546	5.50931	4.54232	-1.30103	-1.11174	3.34268	-1.64433	3.11787	1.03496	4.2812	4.79703	-1.03133	4.45134	4.86626	-1.04535	-0.792648	4.75389	-0.862626	3.16376	-1.50421	0.287703	-1.48952	-0.895687	2.65293	-0.299681	4.3432	3.312	3.98303	3.97343	2.49177	-1.5912	-0.878027	2.21446	4.353	-1.2248
hsa-miR-4268	2.30886	2.97927	5.57369	2.47593e-07	1.45995e-06	6.16426	UP	1.57328	1.59796	3.81605	3.84709	1.80609	4.73251	2.32055	-1.52546	-1.67249	3.15881	-1.30103	4.96342	4.78213	5.17397	-1.4164	0.318516	3.89897	-1.02947	1.93585	-1.66996	-1.35138	4.65402	-0.792648	1.99477	5.12412	4.31731	-1.50421	-1.64695	-1.48952	3.42256	5.55667	4.62931	-1.64229	3.53471	3.22955	1.96187	4.26533	0.785505	-0.878027	-1.39765	4.15513	3.64257
hsa-miR-4269	2.41341	3.16658	6.64323	2.1269e-09	1.75984e-08	10.8251	UP	3.08746	2.27046	4.69038	-1.57134	5.00178	4.09315	-1.55063	3.17799	1.47338	2.45353	-1.30103	3.7972	2.2767	2.36133	2.97604	3.75333	4.1047	3.84295	2.05274	7.90949	2.90998	3.12784	5.07468	4.2481	-0.862626	3.79535	2.93238	-0.402451	3.47727	4.43089	-1.59003	-0.299681	-1.64229	1.9424	2.34602	0.732516	3.07508	1.29964	-0.878027	-1.39765	4.99551	-1.2248
hsa-miR-4270	1.07748	7.9068	13.0276	1.35668e-22	8.48754e-21	40.9167	UP	7.79764	7.31996	7.41088	6.51142	7.71505	7.81202	6.80151	7.57286	7.53713	7.49043	7.57286	7.7263	6.92143	7.22535	7.23188	7.3918	7.28287	7.41711	7.58608	7.56092	7.75451	7.62741	7.88022	8.25386	7.60037	6.81018	7.24421	7.25001	7.37975	7.1314	7.09342	7.92502	7.68901	7.5137	7.68901	7.71505	7.17757	6.95922	6.85357	7.14311	7.50175	7.40465
hsa-miR-4272	-1.1698	-0.722717	-3.56198	0.00058559	0.0017245	-1.31303	DOWN	-1.70976	-1.61738	2.79957	-1.57134	0.853209	2.83188	-1.55063	1.82044	-1.67249	-1.74038	4.79703	-1.11174	-1.57285	-1.64433	-1.4164	5.35273	-1.13091	-1.02947	0.691099	-0.623967	-1.35138	-1.04535	-0.792648	-1.55614	-0.862626	-1.02774	-1.50421	-0.471846	-1.48952	-0.895687	-1.59003	-0.299681	3.1657	-1.40019	0.0827912	1.92169	-1.47576	-1.5912	-0.878027	2.75	-1.4982	4.7452
hsa-miR-4274	1.10237	5.12894	3.90474	0.000179799	0.000599719	-0.195941	UP	4.7579	5.59032	5.4454	5.56967	5.59536	-1.2376	3.44726	4.37741	2.23589	4.91689	4.2933	4.53457	3.52029	6.84495	4.61865	4.99551	5.78281	5.37396	4.88317	1.84742	-1.35138	5.19915	5.90878	6.37297	6.15647	4.1634	2.90266	5.79908	5.3624	-0.895687	5.3624	5.40663	6.19688	4.16947	5.55667	5.23727	5.60142	4.94763	5.00664	5.13671	5.11037	4.83758
hsa-miR-4275	-1.21683	-0.0759344	-2.95613	0.00395815	0.00935729	-3.09177	DOWN	0.908879	1.17603	3.47162	-1.57134	-0.767357	-1.2376	3.09469	3.12209	-0.913769	4.42903	3.84709	3.08538	-1.57285	2.79251	-1.4164	-1.62845	5.21921	4.51246	-1.68431	5.98073	2.45353	-1.04535	-0.792648	-1.55614	-0.862626	-1.02774	-1.50421	-1.64695	-1.48952	-0.895687	3.50599	-0.299681	2.59251	2.06629	-1.36892	0.621857	2.44545	-1.5912	-0.878027	-1.39765	-1.4982	4.21205
hsa-miR-4276	4.20927	3.65118	10.0614	1.71487e-16	3.79192e-15	26.9746	UP	4.94938	4.84556	4.31302	4.92427	4.88556	-1.2376	-1.55063	-1.52546	0.709412	4.58526	3.48763	6.33999	5.37645	0.56533	4.10831	2.40107	-1.13091	4.67612	-1.68431	4.7579	2.65805	-1.04535	-0.792648	4.56421	3.33615	-1.02774	-1.50421	2.27046	-1.48952	-0.895687	-1.59003	-0.299681	0.63511	2.47623	3.2034	1.68984	4.16545	-1.5912	-0.878027	2.67757	-1.4982	-1.2248
hsa-miR-4279	2.01825	4.34126	5.76873	1.06572e-07	6.52406e-07	6.98741	UP	4.24053	5.28925	4.37741	-1.57134	5.3172	5.0237	-1.55063	4.14305	3.7888	2.62525	-1.30103	5.75765	3.8797	4.1634	3.74453	2.90536	4.66341	2.92925	4.67213	3.02015	-1.35138	-1.04535	5.35727	5.60716	5.86246	-1.02774	3.16182	3.82077	3.46258	3.5724	4.39821	-0.299681	5.63388	5.00178	4.40106	4.62931	4.44009	1.17199	-0.878027	2.99057	4.88949	2.91423
hsa-miR-4282	-1.43453	-0.491913	-4.26002	4.93426e-05	0.000182106	1.0382	DOWN	-1.74038	2.27919	4.44701	-1.57134	-1.67742	-1.2376	3.48321	-1.52546	3.81377	-1.74038	-1.30103	2.90536	-1.57285	-0.192736	-1.4164	3.07299	-1.13091	-1.02947	-0.722495	-1.66996	-1.35138	-1.04535	-0.792648	0.737923	-0.862626	3.50184	1.90942	0.233005	-1.48952	4.41566	3.13725	-0.299681	-1.64229	-1.40019	-0.681077	4.00015	-1.47576	2.0843	-0.878027	4.29543	-1.4982	-1.2248
hsa-miR-4284	1.25938	3.10626	3.48468	0.000756971	0.00215436	-1.55434	UP	2.22623	4.70207	3.94355	1.99477	3.44238	-1.2376	1.22442	3.50847	-1.67249	3.2886	3.60931	-1.11174	1.92615	-1.64433	3.7401	0.627286	4.50348	4.14745	2.09145	-1.66996	3.61829	4.31516	4.37348	1.97449	-0.862626	4.29157	1.66545	2.85856	2.63763	-0.895687	5.92464	-0.299681	0.345352	5.09819	3.44238	4.12681	4.25892	4.66999	4.69265	2.82491	5.12604	-1.2248
hsa-miR-4285	1.16582	0.69317	2.5887	0.0111993	0.0229811	-4.03709	UP	3.29504	1.84213	1.54892	-1.57134	-0.0754835	2.41758	-1.55063	-1.52546	3.01742	-1.4617	-1.30103	-1.11174	-1.57285	3.02508	-1.4164	-1.62845	-1.13091	-1.02947	-1.68431	-1.66996	-1.35138	3.98303	-0.792648	-1.55614	-0.862626	-1.02774	-1.50421	1.53657	-1.48952	-0.895687	2.69412	4.64236	-1.64229	-1.40019	-1.72575	2.84316	-1.47576	-1.5912	-0.878027	-1.39765	-1.4982	3.21507
hsa-miR-4286	-1.73903	6.79294	-14.2299	5.81955e-25	5.78804e-23	46.3242	DOWN	7.25001	7.28287	7.98524	7.50175	7.00315	8.09745	8.49922	7.71505	7.5137	6.82007	7.61325	7.76955	7.50175	7.1314	7.57286	7.8257	7.67475	7.89342	8.41466	8.48088	7.61325	7.86601	6.86776	6.64488	6.62673	7.21278	7.81202	7.68901	7.79764	7.67475	7.53713	7.66471	6.92143	7.57286	7.03478	7.29533	7.04703	7.88022	8.08349	7.89342	8.28464	7.35304
hsa-miR-4287	1.04914	0.870046	2.2118	0.0294597	0.0528791	-4.89318	UP	-1.74038	1.28407	-1.58516	2.26453	-0.228451	-1.2376	2.20291	-1.52546	1.87164	-0.310407	4.00015	-1.11174	-1.57285	-0.0854286	3.9181	-1.62845	-1.13091	-1.02947	0.503967	-0.868879	-1.35138	3.22432	-0.792648	-1.55614	-0.862626	-1.02774	-1.50421	0.584758	-1.48952	-0.895687	-1.59003	-0.299681	-1.64229	2.41959	4.35479	-1.68781	3.72769	5.01963	-0.878027	3.89259	-1.4982	2.79251
hsa-miR-4288	1.29661	0.042802	3.16825	0.00208251	0.00535772	-2.49898	UP	-1.74038	-1.61738	4.58526	-1.57134	-1.67742	-1.2376	-1.55063	1.14052	3.12496	-1.51558	-1.30103	-1.11174	-1.57285	-1.64433	-1.4164	-1.62845	-1.13091	-1.02947	-1.68431	-1.66996	-1.35138	3.2886	-0.792648	2.15948	-0.862626	-1.02774	-1.50421	0.655588	-1.48952	-0.895687	-1.59003	-0.299681	0.420159	1.63493	-1.72575	-1.68781	-1.47576	-1.5912	-0.878027	-1.39765	-1.4982	-1.2248
hsa-miR-4290	3.82474	2.085	10.9046	2.95812e-18	8.07189e-17	31.0025	UP	1.52004	3.37599	-1.58516	-1.57134	3.14271	-1.2376	-1.55063	-1.52546	2.15146	-1.56473	-1.30103	-1.11174	-1.57285	-1.64433	-1.4164	-1.62845	-1.13091	-1.02947	0.338967	-1.66996	-1.35138	-1.04535	-0.792648	4.87499	5.60142	-1.02774	-1.50421	-0.292407	-1.48952	-0.895687	-1.59003	-0.299681	1.66357	-1.40019	2.72225	3.52029	3.87276	-1.5912	-0.878027	-1.39765	1.34189	-1.2248
hsa-miR-4292	1.93639	1.97527	4.70399	8.96145e-06	3.85027e-05	2.67924	UP	2.07226	4.62058	1.9424	-1.57134	3.20803	-1.2376	3.85204	-1.52546	-0.810121	0.390121	4.69786	5.17666	3.48763	-1.64433	2.08243	0.774725	-1.13091	-1.02947	1.57328	-1.66996	2.68346	-1.04535	-0.792648	-1.55614	-0.862626	3.0363	3.312	3.26537	-1.48952	-0.895687	-1.59003	-0.299681	0.578011	2.02422	1.40859	3.71875	-1.47576	4.49475	-0.878027	3.00416	3.0363	5.00664
hsa-miR-4294	1.3406	10.1684	12.186	6.77352e-21	2.63244e-19	37.036	UP	9.67509	10.124	9.50516	9.64725	9.56193	9.38092	9.77368	9.46645	9.1184	9.25742	9.77368	9.1184	9.1184	9.59044	9.67509	9.38092	10.0013	10.1715	9.77368	10.0864	9.67509	9.45357	8.93752	9.09969	10.0864	10.0013	9.92015	9.73687	9.34629	10.5571	9.88389	10.5228	9.50516	9.08942	9.81192	9.77368	9.02022	8.9811	9.59044	9.14214	9.7082	10.2934
hsa-miR-4295	-1.37608	0.468619	-2.96633	0.00384047	0.00910426	-3.06404	DOWN	2.19471	-1.61738	3.71288	-1.57134	1.60689	-1.2376	4.47346	2.1264	-1.67249	0.157538	-1.30103	4.72469	4.32125	0.496956	4.91247	-0.301363	-1.13091	-1.02947	4.5506	4.19143	-1.35138	5.30804	-0.792648	0.958802	-0.862626	-1.02774	-1.50421	2.02826	1.59397	-0.895687	1.73626	-0.299681	1.83727	2.74629	-0.950571	2.67031	-1.47576	5.79335	-0.878027	3.96113	1.72	3.48321
hsa-miR-4296	-1.61405	1.33166	-3.68027	0.000392631	0.00120323	-0.93608	DOWN	3.3259	3.20803	-1.58516	2.85534	3.88879	5.14043	1.97984	3.42758	-1.67249	3.95562	2.69941	-1.11174	-1.57285	4.5814	2.92725	4.02351	4.1973	3.88879	5.30804	-0.590648	2.71102	-1.04535	4.353	1.0882	-0.862626	5.25267	5.13188	3.8797	3.10224	-0.895687	3.58795	-0.299681	-1.64229	2.17334	3.98714	1.36522	3.20803	2.04287	-0.878027	4.39821	3.2034	-1.2248
hsa-miR-4297	2.42274	1.35488	5.944	4.94549e-08	3.23602e-07	7.7383	UP	4.37545	-1.61738	3.52029	3.07716	-0.410275	-1.2376	1.8567	1.07935	-0.288165	-1.74038	-1.30103	-1.11174	-1.57285	-1.64433	2.10057	-1.62845	-1.13091	-1.02947	3.20803	1.3472	2.39173	-1.04535	-0.792648	-1.55614	-0.862626	4.06097	4.27324	-1.64695	1.53476	-0.895687	-1.59003	-0.299681	1.43809	-1.40019	3.47727	-1.68781	-1.47576	3.26282	-0.878027	-1.39765	-1.4982	-1.2248
hsa-miR-4299	-2.85417	3.33013	-6.84717	8.31534e-10	7.43166e-09	11.7489	DOWN	6.0678	5.12412	6.31451	5.51466	4.89462	2.39621	3.70231	5.33051	7.25001	6.43033	5.53677	6.28467	6.55424	5.98073	5.4264	5.40663	5.11277	4.71235	5.22174	0.255407	5.47725	-1.04535	4.1973	2.72225	4.37741	-1.02774	4.59131	4.98533	3.89673	4.68812	5.57251	4.54649	5.92464	5.06404	4.98727	5.62874	5.72797	2.3339	4.34136	5.84947	6.0153	4.14745
hsa-miR-4305	2.82568	0.883826	8.45491	4.07205e-13	5.83509e-12	19.2731	UP	0.587022	-1.61738	-1.58516	3.33615	-1.67742	-1.2376	-1.55063	-1.52546	-1.67249	2.44366	-1.30103	-1.11174	-1.57285	1.49337	-1.4164	3.41444	-1.13091	-1.02947	1.55073	3.38259	1.93727	-1.04535	-0.792648	-1.55614	-0.862626	-1.02774	-1.50421	-1.64695	-1.48952	-0.895687	-1.59003	-0.299681	0.541484	-1.40019	1.28122	-0.0590659	-1.47576	-1.5912	-0.878027	-1.39765	-1.4982	-1.2248
hsa-miR-4306	1.53677	2.60798	3.353	0.00116226	0.00318503	-1.95597	UP	3.44482	3.63265	0.393033	-1.57134	4.31731	-1.2376	1.45107	-1.52546	-1.67249	2.14205	-1.30103	-1.11174	5.62037	5.68357	-1.4164	3.29834	4.18147	2.83188	4.13305	-0.427714	4.48286	3.32137	3.67391	-1.55614	-0.862626	4.7208	4.53457	3.76695	4.69587	3.97823	3.91634	-0.299681	3.40469	3.09825	3.75529	-1.01025	4.46897	5.51466	-0.878027	4.49146	-1.4982	-1.2248
hsa-miR-4309	-1.02113	-0.375456	-2.78244	0.00654756	0.0145281	-3.55182	DOWN	-1.69376	4.31302	-1.58516	-1.57134	2.22803	2.69035	-1.55063	-1.52546	-1.67249	-1.74038	-1.30103	-1.11174	-1.57285	-1.64433	2.02826	4.141	-1.13091	4.86626	-0.493676	1.20515	-1.35138	2.89996	-0.792648	-1.55614	-0.862626	-1.02774	2.10057	-0.0816484	1.9853	3.26537	-1.59003	-0.299681	0.747659	-1.40019	-1.56961	1.70978	-1.47576	-1.5912	-0.878027	-1.39765	1.50826	2.3771
hsa-miR-431-3p	1.83196	0.444168	4.9611	3.20141e-06	1.49847e-05	3.67496	UP	-0.251341	-1.61738	-1.58516	-1.57134	1.62809	-1.2376	-1.55063	-1.52546	1.84742	4.01081	-1.30103	3.01327	-1.57285	2.16792	-1.4164	-1.62845	-1.13091	-1.02947	2.5452	4.59748	-1.35138	-1.04535	-0.792648	-1.55614	5.51713	-1.02774	-1.50421	0.302066	-1.48952	-0.895687	-1.59003	-0.299681	0.958802	-1.40019	0.263956	-1.68781	2.36133	-1.5912	-0.878027	-1.39765	-1.4982	-1.2248
hsa-miR-4313	1.93341	3.68901	5.34245	6.61479e-07	3.51282e-06	5.20658	UP	4.18352	3.69363	5.07235	-1.57134	4.9814	2.23589	-1.55063	1.32944	3.13454	2.00758	3.62726	4.92644	4.1047	1.58936	-1.4164	3.7972	4.864	3.17011	2.95704	4.00015	4.68454	3.92915	-0.792648	5.40174	-0.862626	4.83376	3.22955	0.624571	-1.48952	-0.895687	4.69985	-0.299681	5.65225	4.03471	4.11515	3.84101	3.2034	-1.5912	4.06097	4.8479	4.74888	2.38257
hsa-miR-4314	2.543	0.764688	7.30753	9.7037e-11	9.91633e-10	13.8653	UP	-1.63358	-1.61738	-1.58516	0.529099	2.56184	-1.2376	-1.55063	-1.52546	1.04247	-1.74038	-1.30103	-1.11174	-1.57285	-1.64433	-1.4164	-0.120967	-1.13091	-1.02947	0.77011	-1.66996	4.27735	-1.04535	-0.792648	-1.55614	-0.862626	-1.02774	-1.50421	2.00071	2.49751	-0.895687	-1.59003	-0.299681	-1.64229	-1.40019	0.927033	0.557214	2.27919	1.19333	-0.878027	-1.39765	2.41395	-1.2248
hsa-miR-4316	-1.3985	2.38957	-2.90569	0.00459089	0.0106663	-3.22777	DOWN	5.55667	4.46897	5.26512	5.93112	4.80516	4.50348	-1.55063	2.54218	4.80516	4.17144	4.41566	-1.11174	5.86246	4.41357	3.28353	1.83238	2.70529	3.99358	4.62058	-1.66996	4.60699	-1.04535	5.01521	4.79222	4.49475	-1.02774	5.14921	3.08335	-1.48952	4.89462	1.53657	-0.299681	2.74347	4.49475	4.01956	3.98714	4.78377	2.18005	-0.878027	-1.39765	4.50348	-1.2248
hsa-miR-4317	-2.67438	0.532823	-6.57918	2.8514e-09	2.32186e-08	10.5369	DOWN	3.36582	-1.61738	2.36484	3.52986	3.70231	3.54579	-1.55063	-1.52546	-0.0513407	-1.16244	3.04401	-1.11174	5.67074	3.7972	4.7452	2.22982	-1.13091	-1.02947	1.90942	1.2728	-1.35138	3.99123	-0.792648	-1.55614	-0.862626	2.94416	5.73312	3.98509	2.19112	-0.895687	2.94416	-0.299681	1.67341	1.62809	4.30735	-1.68781	4.33309	1.03745	-0.878027	5.45105	3.03221	3.13184
hsa-miR-4319	1.47968	0.516565	3.61749	0.000485927	0.00145438	-1.13728	UP	-1.40796	3.13998	-1.58516	-1.57134	-0.264626	-1.2376	-1.55063	-1.52546	-1.67249	4.52625	-1.30103	-1.11174	-1.57285	-1.64433	-1.4164	-1.62845	-1.13091	2.82491	0.892879	-0.746143	4.34504	-1.04535	-0.792648	0.758319	-0.862626	-1.02774	-1.50421	-1.64695	2.46643	-0.895687	-1.59003	5.20735	0.930846	2.72434	2.01438	-1.68781	-1.47576	-1.5912	-0.878027	-1.39765	-1.4982	-1.2248
hsa-miR-4321	1.42721	1.83386	3.21656	0.00179177	0.00467537	-2.35936	UP	2.90536	4.39821	1.62288	3.8011	2.85856	-1.2376	4.24223	-1.52546	-1.67249	5.59536	3.90575	-1.11174	-1.57285	3.61462	-1.4164	3.38938	-1.13091	2.95459	2.06435	-1.66996	5.21668	-1.04535	-0.792648	1.32151	-0.862626	4.58526	-1.50421	-1.64695	3.62996	4.85873	3.7401	-0.299681	-1.64229	3.3567	2.74065	3.02726	1.87667	0.726429	-0.878027	-1.39765	-1.4982	-1.2248
hsa-miR-4323	1.22597	4.62393	4.23525	5.41131e-05	0.000197721	0.949801	UP	4.67612	5.39923	4.14745	4.14745	4.92644	3.30551	2.85211	-1.52546	3.37069	4.84196	3.32885	4.55234	4.43089	5.86246	4.80959	5.53091	4.11216	5.54159	4.67213	1.92169	1.99477	5.96637	5.77757	5.47125	4.54649	3.12784	2.40924	4.81346	5.26743	-0.895687	5.55147	-0.299681	5.67738	4.78048	4.95114	5.65225	3.98714	5.34389	3.96285	2.08243	4.90246	4.82981
hsa-miR-4324	2.08624	-0.014999	6.43108	5.59614e-09	4.31054e-08	9.87457	UP	-1.74038	-1.61738	-1.58516	-1.57134	-0.440538	-1.2376	-1.55063	-1.52546	-0.366604	-1.17735	-1.30103	-1.11174	-1.57285	-1.64433	-1.4164	-1.62845	-1.13091	-1.02947	1.1578	-1.66996	3.11787	-1.04535	-0.792648	-1.55614	-0.862626	-1.02774	-1.50421	-0.257016	-1.48952	-0.895687	-1.59003	-0.299681	-0.184088	-1.40019	-1.72575	-1.68781	-1.47576	-1.5912	-0.878027	-1.39765	-1.4982	-1.2248
hsa-miR-4326	2.91082	1.0211	7.5831	2.64024e-11	2.90654e-10	15.1495	UP	0.522253	-1.61738	4.22813	1.29599	1.51154	-1.2376	-1.55063	-1.52546	2.97371	-1.74038	-1.30103	-1.11174	-1.57285	-1.64433	1.57569	1.46698	-1.13091	-1.02947	0.695846	-1.66996	-1.35138	-1.04535	-0.792648	-1.55614	3.59977	-1.02774	-1.50421	-1.64695	-1.48952	-0.895687	-1.59003	-0.299681	4.11216	-1.40019	2.42704	1.54078	-1.47576	-1.5912	-0.878027	-1.39765	-1.4982	-1.2248
hsa-miR-4329	2.47663	1.62192	6.56361	3.06154e-09	2.47724e-08	10.4671	UP	0.220374	3.0674	1.25466	-1.57134	0.80367	-1.2376	2.14205	4.22231	-1.67249	3.96113	-1.30103	2.95053	-1.57285	1.72496	-1.4164	0.410286	-1.13091	-1.02947	2.10057	3.41834	3.69771	-1.04535	-0.792648	-1.55614	-0.862626	-1.02774	-1.50421	2.21446	2.31082	-0.895687	4.78377	-0.299681	1.84452	3.98303	4.07673	-0.148396	1.63493	-1.5912	-0.878027	2.42502	-1.4982	-1.2248
hsa-miR-433-5p	3.874	1.61632	9.2988	6.88077e-15	1.20885e-13	23.3141	UP	4.26321	3.62069	1.9853	-1.57134	1.81418	-1.2376	-1.55063	-1.52546	1.64022	-1.74038	-1.30103	-1.11174	-1.57285	-0.114846	-1.4164	-1.62845	-1.13091	-1.02947	-1.68431	-1.66996	-1.35138	-1.04535	3.8232	-1.55614	-0.862626	-1.02774	-1.50421	2.8933	-1.48952	4.29757	3.71875	-0.299681	4.31731	-1.40019	-1.53492	1.51388	-1.47576	-1.5912	-0.878027	-1.39765	-1.4982	-1.2248
hsa-miR-4418	-1.38075	0.390964	-2.9454	0.00408556	0.00960538	-3.12085	DOWN	1.45107	2.8402	4.64627	-1.57134	-1.67742	2.97137	-1.55063	-1.52546	2.99751	-0.899626	-1.30103	-1.11174	-1.57285	2.38996	-1.4164	-1.62845	-1.13091	3.59977	-0.835626	-1.66996	-1.35138	-1.04535	4.77593	4.61148	-0.862626	-1.02774	-1.50421	2.32863	3.9181	3.69771	1.24918	-0.299681	4.49146	4.30556	-1.46366	-1.68781	2.62262	7.22535	-0.878027	-1.39765	3.04167	-1.2248
hsa-miR-4419a	1.59658	4.40518	4.47768	2.16353e-05	8.69821e-05	1.82975	UP	5.08698	4.78048	3.48763	5.62254	4.34893	-1.2376	-1.55063	3.74856	4.9073	7.05858	5.98767	5.75103	5.30085	5.27545	4.4536	4.46897	5.28078	4.88949	4.39029	4.38178	4.06599	4.49475	-0.792648	3.52986	4.51246	3.61462	5.27075	4.25023	4.68812	-0.895687	5.2442	-0.299681	4.24392	4.58954	5.12412	2.18005	4.15141	-1.5912	4.65824	3.5724	1.95609	2.67757
hsa-miR-4419b	-1.27774	6.63328	-11.698	6.75212e-20	2.22041e-18	34.7538	DOWN	6.64016	6.89941	7.37975	8.28464	6.7496	6.2501	6.50222	7.25001	7.41711	7.60037	7.3918	6.77241	7.45669	7.53713	7.44288	7.65198	7.44288	7.1661	7.50773	7.23842	7.20242	6.70667	6.97477	6.80151	7.00315	7.61325	7.54841	7.66471	7.01285	7.41711	6.84495	7.36533	7.08269	6.87915	7.46724	6.96888	7.29533	7.18981	8.28464	7.88022	7.1314	6.92143
hsa-miR-4423-5p	-3.0825	1.28443	-6.34948	8.09626e-09	6.03689e-08	9.512	DOWN	4.78048	1.43342	3.84709	3.73816	3.51096	2.6121	5.86836	-1.52546	2.51805	3.8797	2.44366	3.79351	2.19112	-1.64433	4.90488	5.12412	-1.13091	3.22693	5.34164	1.29964	4.72275	4.10831	4.42716	-1.55614	-0.862626	4.69265	5.25496	4.28985	3.05152	4.06097	4.54441	-0.299681	0.203055	-1.40019	3.29504	3.92915	5.09605	6.39353	-0.878027	4.05682	5.20349	4.33711
hsa-miR-4427	-1.28939	-0.180013	-3.20494	0.00185805	0.00482866	-2.39311	DOWN	2.72225	3.09825	1.31213	-1.57134	0.318516	-1.2376	3.8862	-1.52546	-1.67249	-1.13807	-1.30103	-1.11174	-1.57285	1.75786	-1.4164	-1.62845	-1.13091	-1.02947	-1.68431	-1.66996	-1.35138	-1.04535	-0.792648	2.93965	-0.862626	-1.02774	-1.50421	1.62288	4.73251	-0.895687	4.0822	4.80959	0.743418	5.19348	-1.72575	-0.578341	-1.47576	-1.5912	-0.878027	3.5724	-1.4982	4.93941
hsa-miR-4429	-1.88115	6.86487	-12.0037	1.59503e-20	5.92934e-19	36.186	DOWN	7.88022	7.34266	8.09745	8.12968	7.40465	8.06824	7.90949	8.05433	8.34714	8.79879	8.06824	7.18981	8.3334	8.55764	7.88022	8.15984	8.0401	7.96987	7.29533	6.61624	7.90949	7.81202	7.20242	7.52593	7.42968	7.83932	8.48088	7.36533	7.52593	7.73944	7.2718	7.22535	8.46324	7.18981	7.83932	8.12968	7.22535	7.45669	8.20935	7.10702	8.15984	7.31996
hsa-miR-4431	2.74107	0.797644	6.67947	1.80107e-09	1.52467e-08	10.9886	UP	1.94413	-1.61738	0.899604	-1.57134	-1.67742	-1.2376	-1.55063	-1.52546	-1.67249	1.59397	2.99526	-1.11174	3.39475	-1.64433	-1.4164	4.71235	-1.13091	-1.02947	-1.68431	-1.66996	5.80519	-1.04535	-0.792648	1.44319	-0.862626	-1.02774	-1.50421	0.895473	2.70529	-0.895687	-1.59003	-0.299681	-1.64229	-1.40019	2.37869	0.858297	-1.47576	-1.5912	-0.878027	-1.39765	-1.4982	-1.2248
hsa-miR-4433b-5p	1.02445	4.46069	3.84567	0.000221441	0.000712668	-0.393789	UP	4.55234	5.09399	1.76774	3.67391	4.18536	3.39475	3.61108	3.312	2.74065	5.03631	3.68047	4.82203	5.99582	4.0404	4.02351	3.83049	5.17397	5.26003	2.47623	5.05674	4.05682	-1.04535	3.64018	4.69985	5.28542	3.33615	4.28789	4.74147	3.71875	3.43766	3.36385	5.56173	4.38655	3.54579	5.34827	5.48179	4.68812	-1.5912	5.17936	-1.39765	6.00333	4.85412
hsa-miR-4434	-3.76286	1.71971	-8.08805	2.37543e-12	2.88766e-11	17.5287	DOWN	5.8372	3.98714	6.53024	0.947363	2.59977	6.04465	5.07468	2.24268	5.12412	6.3076	2.25037	-1.11174	4.50727	-1.64433	4.26109	4.15513	2.53962	3.91095	1.86618	-1.66996	4.94763	-1.04535	5.63388	5.63388	-0.862626	-1.02774	-1.50421	-0.718956	4.43089	-0.895687	6.31105	-0.299681	5.3505	4.36532	4.11024	4.81749	4.4536	2.15948	6.2812	5.34827	4.46007	5.4611
hsa-miR-4435	3.27322	5.08502	7.99995	3.62251e-12	4.26227e-11	17.1115	UP	5.34827	5.09399	4.43565	4.83758	4.5679	-1.2376	4.74147	5.25267	5.9344	5.65827	4.87499	5.02985	4.67213	3.44726	4.46007	3.312	3.97343	5.38632	5.0237	-0.380813	4.07673	-1.04535	-0.792648	2.28507	4.94344	5.55667	6.61624	4.0885	5.01963	3.16182	4.54441	-0.299681	-1.64229	4.31731	3.99123	3.60573	4.71637	4.8988	-0.878027	2.81844	4.06097	4.053
hsa-miR-4436a	2.27446	0.839862	5.54483	2.80193e-07	1.62969e-06	6.0436	UP	-1.30229	-1.61738	3.44002	-1.57134	2.32436	-1.2376	-1.55063	-1.52546	2.81453	-1.52767	-1.30103	-1.11174	-1.57285	-1.64433	-1.4164	3.57742	-1.13091	-1.02947	1.50314	1.60513	-1.35138	-1.04535	-0.792648	2.60769	-0.862626	-1.02774	-1.50421	2.22982	-1.48952	-0.895687	-1.59003	-0.299681	1.35236	-1.40019	0.810659	1.38336	-1.47576	-1.5912	-0.878027	-1.39765	-1.4982	-1.2248
hsa-miR-4436b-3p	-1.63935	2.20354	-3.51788	0.000678237	0.00195031	-1.45117	DOWN	4.60924	0.743418	3.1657	6.80151	3.13725	-1.2376	-1.55063	2.83188	4.65824	3.74856	2.07862	-1.11174	4.94344	3.68271	2.49751	-1.62845	-1.13091	5.4237	0.729473	4.763	6.38135	-1.04535	3.49018	4.26919	-0.862626	3.66092	5.12796	4.18721	4.21205	-0.895687	4.21816	6.64488	5.3106	4.32125	4.33924	-1.68781	4.01956	2.63037	4.14305	5.33938	4.13491	3.31723
hsa-miR-4439	-2.20847	2.87394	-5.83308	8.04805e-08	5.02269e-07	7.26193	DOWN	5.00178	3.67391	4.49922	-1.57134	4.08438	3.61108	3.89259	3.30163	5.45567	5.44056	4.42279	-1.11174	4.72469	4.84556	-1.4164	5.84262	4.78377	2.88748	5.19915	5.40174	5.59032	3.80497	4.24601	3.4337	3.92915	3.41444	4.9579	2.86909	4.82623	5.046	3.82482	6.18622	4.07912	4.39242	5.01102	3.19436	4.63338	2.80429	3.7888	5.2442	4.64236	5.59032
hsa-miR-4440	1.27688	3.49835	3.43484	0.000891471	0.00251831	-1.70775	UP	3.41834	0.639451	4.94142	4.90988	4.63807	-1.2376	5.01963	2.59977	3.05803	4.35479	5.63131	-1.11174	2.34807	4.85024	-1.4164	4.92644	3.11287	3.9477	1.43987	5.3505	2.8933	-1.04535	3.49786	4.30556	3.67007	-1.02774	5.70793	4.17751	2.3882	4.14745	-1.59003	-0.299681	0.941725	3.59285	2.41159	0.827879	4.76751	1.09566	-0.878027	4.14943	3.17799	5.14043
hsa-miR-4444	-1.8968	2.52747	-4.22332	5.65679e-05	0.000205519	0.907321	DOWN	3.26026	4.33711	2.15948	3.4337	4.05682	6.0153	-1.55063	2.61393	4.17942	-0.88911	4.51246	-1.11174	4.76751	5.42101	4.141	4.73716	5.37645	4.44907	4.78769	3.14271	-1.35138	-1.04535	4.39029	3.67007	4.64432	5.25724	5.25496	1.59596	6.12799	4.14305	-1.59003	-0.299681	-1.64229	5.53677	3.76695	4.47863	6.09448	2.5316	-0.878027	4.83758	5.27545	4.39456
hsa-miR-4446-3p	1.3639	7.34207	6.77072	1.1836e-09	1.03263e-08	11.4015	UP	8.53147	7.54841	8.68331	5.4162	8.19187	6.22513	6.00333	6.11895	6.63545	7.90949	6.93345	8.91338	8.19187	6.92143	7.25001	6.12799	7.84629	6.89941	5.91648	6.67492	4.81548	6.87915	8.91338	8.14455	5.96637	4.43565	5.87464	6.0977	5.8372	4.70812	5.94475	4.79703	6.7496	7.90949	6.01215	5.32587	7.54841	5.23505	5.97295	6.95922	6.21351	6.31451
hsa-miR-4448	-2.24157	7.52811	-9.77516	6.84882e-16	1.38325e-14	25.6013	DOWN	9.1184	7.79764	8.30041	7.73944	6.57651	9.31216	8.82188	8.19187	8.3334	10.6306	8.25386	7.2718	7.96987	8.82188	6.36559	7.95247	6.76149	7.79764	8.3153	7.49043	8.8637	10.7779	8.48088	7.29533	8.0401	8.22365	10.124	9.64725	10.7434	9.23212	7.88022	9.09969	7.22535	8.20061	7.78429	8.73948	8.25386	8.56758	8.06824	8.23813	7.85963	8.61613
hsa-miR-4449	1.00412	7.06743	7.11239	2.42269e-10	2.32032e-09	12.9633	UP	7.71505	7.12032	6.98067	5.66128	7.70108	6.53024	4.9579	6.76149	6.94792	7.00315	6.67492	7.60037	6.20085	5.97295	6.69123	6.37297	7.08269	6.70667	5.62254	5.38104	6.11156	7.35304	7.09342	7.86601	6.89941	6.14909	5.61821	5.94475	6.2501	5.89443	6.61624	6.86776	7.57286	6.86776	7.05858	6.95922	6.92143	4.78048	5.83114	6.2422	6.85357	6.39353
hsa-miR-4450	1.54267	5.31295	4.17157	6.85079e-05	0.000245766	0.724077	UP	5.93112	5.95946	2.43436	5.26743	5.55147	3.74856	6.12799	5.12412	5.3218	5.64678	5.58468	5.25267	4.62931	4.0589	6.10435	5.14538	6.40753	6.44729	4.01081	4.85873	4.65009	-1.04535	-0.792648	1.75995	4.14745	5.08338	5.43558	5.71452	5.52245	-0.895687	4.7452	-0.299681	4.96822	4.06599	5.38104	5.86246	5.38104	6.0373	5.57251	4.9977	5.45105	3.94143
hsa-miR-4451	-1.60481	0.540579	-3.75275	0.00030608	0.000958964	-0.700591	DOWN	4.19143	-1.61738	2.52925	3.76695	-1.67742	-1.2376	1.19009	-1.52546	-1.67249	2.16159	-1.30103	-1.11174	-1.57285	-0.24111	-1.4164	1.45956	3.51096	-1.02947	-0.162956	3.97823	-1.35138	3.25412	-0.792648	-1.55614	-0.862626	2.76771	4.34699	3.07299	4.60247	3.59531	1.525	6.23753	-0.519011	4.32516	2.73627	0.155505	2.75	2.1637	6.14173	4.19498	-1.4982	4.36318
hsa-miR-4454	-2.74745	10.449	-13.6278	8.7397e-24	6.40495e-22	43.6373	DOWN	11.6117	10.9764	10.6306	11.9596	11.7069	12.683	12.6001	11.9596	11.7688	10.9764	11.354	10.852	11.3067	11.2585	11.3067	11.4553	11.1223	12.7074	12.4915	12.4294	11.1223	12.4294	11.1624	10.9764	11.1223	11.9596	12.4294	12.6586	12.2004	12.6001	12.5455	11.2585	10.9764	11.2075	11.1624	11.5144	11.0266	11.9596	12.8026	12.0097	12.251	10.852
hsa-miR-4456	2.37032	0.292784	6.33491	8.64664e-09	6.41001e-08	9.44746	UP	-1.74038	-1.61738	-1.58516	3.45734	-1.67742	-1.2376	-1.55063	2.38063	-1.67249	1.38847	-1.30103	-1.11174	-1.57285	-1.64433	-1.4164	-1.62845	-1.13091	-1.02947	-0.938643	-1.66996	-1.35138	-1.04535	-0.792648	-1.55614	-0.862626	-1.02774	-1.50421	-1.64695	-1.48952	3.14779	-1.59003	-0.299681	-1.64229	2.46643	0.68022	-1.68781	-1.47576	0.701912	-0.878027	-1.39765	-1.4982	-1.2248
hsa-miR-4457	-1.50477	-0.393946	-3.98656	0.000134302	0.000460541	0.0816327	DOWN	5.39673	0.956104	1.03246	2.71102	-1.67742	-1.2376	-1.55063	4.65402	1.12188	-1.2718	2.4363	-1.11174	-1.57285	-0.298	-1.4164	2.0183	-1.13091	-1.02947	-1.68431	-1.66996	-1.35138	-1.04535	-0.792648	0.840209	-0.862626	-1.02774	2.52165	-1.64695	5.46637	-0.895687	-1.59003	-0.299681	-1.64229	-1.40019	1.38604	3.14779	2.44188	4.36532	-0.878027	3.57992	-1.4982	-1.2248
hsa-miR-4458	-1.3791	0.522318	-2.98431	0.00364081	0.00869523	-3.01497	DOWN	3.09469	0.155505	5.18959	-1.57134	0.0724396	-1.2376	-1.55063	-1.52546	-1.67249	-1.40316	-1.30103	-1.11174	3.9372	2.57271	-1.4164	3.87738	-1.13091	3.4337	-0.231379	7.1661	1.87164	-1.04535	-0.792648	1.11385	3.97343	3.54051	1.76774	-0.519011	-1.48952	8.58736	0.806187	-0.299681	2.14205	1.87897	2.09735	-0.984912	-1.47576	0.930846	6.02186	3.38725	4.67413	-1.2248
hsa-miR-4459	1.0212	9.0321	10.7552	6.05721e-18	1.61841e-16	30.2913	UP	8.42824	8.62567	8.62567	9.05529	8.48088	8.30041	8.62567	8.73948	8.70052	8.44376	8.8637	8.68331	8.41466	8.25386	8.62567	8.3334	8.77752	8.79879	8.44376	8.23813	8.75704	8.46324	8.25386	8.5151	9.23212	8.75704	8.41466	8.79879	8.3334	8.56758	8.77752	8.79879	9.35637	8.3736	8.5151	8.64662	8.30041	8.23813	8.68331	8.49922	9.07915	8.82188
hsa-miR-4460	-2.00469	0.864018	-3.79712	0.000262406	0.000836113	-0.554767	DOWN	0.962956	0.503967	1.56342	-1.57134	2.32055	5.23505	2.02126	-1.52546	1.61736	5.62874	-1.30103	-1.11174	-1.57285	-1.64433	-1.4164	-1.62845	-1.13091	-1.02947	0.774725	-1.66996	-1.35138	3.88879	5.45105	5.3195	-0.862626	4.17144	1.64022	3.02726	6.37297	-0.895687	3.84502	-0.299681	3.29182	6.77241	1.8224	-0.272286	3.46258	4.77362	-0.878027	2.50951	4.44009	3.98714
hsa-miR-4461	-1.18612	-0.281427	-3.02506	0.00322315	0.00784732	-2.90281	DOWN	3.96456	-1.61738	-1.58516	1.65575	0.624571	-1.2376	-1.55063	4.66785	-0.724857	3.17011	-1.30103	-1.11174	-1.57285	-1.64433	-1.4164	-1.62845	3.22693	-1.02947	4.82623	5.25267	-1.35138	-1.04535	-0.792648	3.10224	-0.862626	4.23631	-1.50421	3.24649	3.54051	-0.895687	-1.59003	-0.299681	3.84295	-1.40019	-1.72575	-1.68781	-1.47576	1.18685	-0.878027	-1.39765	-1.4982	-1.2248
hsa-miR-4465	1.03523	1.57783	2.43137	0.0169812	0.033074	-4.40882	UP	1.9853	0.0268077	-1.58516	1.06785	1.93238	-1.2376	-1.55063	3.64467	-1.67249	2.76771	4.91689	-1.11174	3.77797	3.88165	-1.4164	-1.62845	-1.13091	-1.02947	4.2481	-1.66996	-1.35138	3.59038	-0.792648	-1.55614	-0.862626	-1.02774	3.89259	5.2941	-1.48952	-0.895687	3.24132	-0.299681	0.0632637	-1.40019	-1.07747	1.23001	1.48091	2.26453	-0.878027	2.88124	3.21173	3.32137
hsa-miR-4472	2.22696	4.69218	6.28612	1.07733e-08	7.87278e-08	9.23169	UP	5.1842	5.62254	3.86333	1.93442	4.50348	4.14305	3.63522	4.78048	-0.909813	4.38842	3.20988	2.72434	4.41357	1.32473	2.44545	3.71288	-1.13091	-1.02947	3.91634	4.50987	4.56165	3.36582	4.3036	1.3472	-0.862626	6.04465	6.7496	5.05428	6.0678	-0.895687	5.04347	-0.299681	-1.64229	5.18959	4.82623	3.10982	5.33492	5.54159	5.28078	4.9073	4.03471	6.14173
hsa-miR-4474-3p	2.14477	-0.0291855	6.82236	9.32591e-10	8.30589e-09	11.636	UP	-1.74038	-1.61738	-1.58516	-1.57134	-0.592692	-1.2376	-1.55063	-1.52546	0.0998462	0.912418	-1.30103	-1.11174	-1.57285	-0.18222	-1.4164	-1.62845	-1.13091	-1.02947	-1.68431	1.53103	-1.35138	-1.04535	-0.792648	-1.55614	-0.862626	-1.02774	1.15088	-1.64695	-1.48952	-0.895687	-1.59003	-0.299681	-1.64229	-1.40019	-1.1868	-1.68781	-1.47576	-1.5912	-0.878027	-1.39765	2.21446	-1.2248
hsa-miR-4475	-2.22509	0.384881	-5.08118	1.96068e-06	9.57932e-06	4.15044	DOWN	0.167736	0.877253	-1.58516	-1.57134	0.152022	2.87597	-1.55063	4.50727	3.4337	-1.74038	3.41834	4.52388	4.14745	2.92525	2.13149	-1.62845	-1.13091	-1.02947	0.968879	-1.66996	-1.35138	4.52151	-0.792648	-1.55614	-0.862626	-1.02774	4.64432	3.17466	-1.48952	-0.895687	4.01491	-0.299681	-0.559132	4.96005	3.97823	-1.68781	3.00416	3.51096	3.19902	2.1637	-1.4982	4.02153
hsa-miR-4476	2.42167	6.28794	7.5992	2.44623e-11	2.71626e-10	15.2249	UP	6.00333	6.0977	6.68604	4.73484	5.85299	5.3218	4.5591	5.79908	6.51142	6.92143	6.4928	7.90949	5.94475	6.0678	6.0977	5.48179	6.32162	6.17014	5.79908	4.88949	5.19348	-1.04535	-0.792648	4.99331	-0.862626	5.33051	5.99582	5.39673	5.83114	3.70231	6.09448	-0.299681	3.9271	5.17397	4.96822	6.0977	6.66565	6.86776	6.14909	6.71673	5.65827	6.02186
hsa-miR-4478	2.5552	4.06845	6.50218	4.05109e-09	3.23709e-08	10.1919	UP	4.22813	3.94143	5.16924	4.7713	4.19962	-1.2376	1.58511	3.42256	0.164571	4.59998	5.09819	3.00416	5.27075	3.51788	5.20349	-1.62845	5.14538	-1.02947	0.983374	5.10547	4.62058	-1.04535	-0.792648	5.44823	4.95114	4.40391	4.11216	3.41444	4.06599	3.61829	3.78235	-0.299681	5.14043	3.19902	4.87295	4.27324	4.0404	1.41426	-0.878027	-1.39765	3.87047	-1.2248
hsa-miR-4479	2.5504	3.33728	6.37953	7.0682e-09	5.31669e-08	9.64529	UP	3.86333	3.97583	4.13119	0.691099	4.36103	-1.2376	1.24918	-1.52546	0.481308	3.42758	3.57491	4.94344	2.96554	3.17238	2.72225	2.22623	2.96554	-1.02947	-0.438912	-0.162956	-1.35138	-1.04535	5.93768	5.65225	4.47346	-1.02774	-1.50421	-1.64695	-1.48952	3.54579	4.09043	-0.299681	4.81346	3.99804	4.63338	4.99331	5.26743	-1.5912	-0.878027	-1.39765	5.36714	5.39167
hsa-miR-4480	-4.38339	4.4862	-9.97005	2.66743e-16	5.65451e-15	26.5364	DOWN	7.35304	6.45174	7.30541	5.37645	5.30288	7.70108	6.20973	6.7496	8.05433	7.81202	5.82398	5.37645	5.20349	5.70793	5.55667	6.85357	5.40891	5.66429	6.96888	6.20973	8.53147	11.2585	6.67492	5.33492	8.62567	6.60634	7.44288	6.76149	9.64725	7.1661	6.93345	-0.299681	0.129352	6.94792	5.78281	6.34908	6.87915	6.94069	5.7392	5.88175	6.17014	6.38135
hsa-miR-4481	4.6735	3.4869	10.3895	3.51887e-17	8.43542e-16	28.5456	UP	5.46637	1.31213	3.81605	1.6949	4.11515	-1.2376	-1.55063	-1.52546	5.0237	5.21668	4.47121	-1.11174	0.514275	-1.64433	-1.4164	0.19528	-1.13091	-1.02947	-0.432478	-1.66996	5.09605	-1.04535	-0.792648	4.69265	3.36582	-1.02774	4.0589	-0.152571	2.89996	-0.895687	1.67015	-0.299681	4.0885	-1.40019	4.06832	1.75577	3.31723	-1.5912	-0.878027	-1.39765	-1.4982	-1.2248
hsa-miR-4482-3p	2.03518	2.76947	4.95276	3.31166e-06	1.54444e-05	3.64215	UP	5.11277	1.26471	3.03221	3.09469	4.54649	-1.2376	-1.55063	2.91423	5.2304	4.64236	2.50951	2.75	3.45734	4.53081	-1.4164	1.42822	-1.13091	5.046	2.29001	3.49529	4.84556	5.26743	-0.792648	2.7853	-0.862626	-1.02774	-1.50421	3.75529	-1.48952	-0.895687	-1.59003	-0.299681	3.90121	-1.40019	4.41566	4.74147	2.90536	-1.5912	5.30288	-1.39765	3.62309	-1.2248
hsa-miR-4489	-1.01304	4.37502	-2.89473	0.00474006	0.0109435	-3.25704	DOWN	5.54159	4.89205	5.5043	5.17397	5.06629	5.69914	5.8372	5.53677	5.14921	5.97295	6.14541	5.29882	5.95279	6.76149	5.96637	5.56428	5.61023	5.65827	6.30065	4.57011	4.50135	-1.04535	-0.792648	4.89205	-0.862626	5.95946	5.91648	5.65526	6.04465	-0.895687	5.70793	-0.299681	4.71637	4.42279	6.0977	5.49271	6.00333	6.23286	4.99974	5.74471	5.69012	5.49879
hsa-miR-4490	-1.85817	0.58595	-4.23307	5.45537e-05	0.000198723	0.942035	DOWN	1.52912	-1.61738	0.639451	2.0183	-1.67742	3.70231	5.37645	2.63286	5.40418	4.00169	-1.30103	-1.11174	1.01007	-0.431055	4.95344	0.153764	4.31731	-1.02947	3.67007	1.76774	3.83486	-1.04535	-0.792648	-1.55614	-0.862626	-1.02774	-1.50421	3.18466	1.58936	-0.895687	-1.59003	-0.299681	-1.64229	4.71637	-0.351626	-1.68781	-1.47576	5.45105	3.42256	3.89673	2.08978	2.82491
hsa-miR-449b-3p	2.56884	3.56057	6.6714	1.8691e-09	1.56675e-08	10.9521	UP	4.2481	5.13671	2.95053	2.80429	4.95114	-1.2376	-1.55063	1.62097	2.76771	3.62309	-1.30103	-1.11174	4.92644	-1.64433	-1.4164	-1.62845	-1.13091	-1.02947	4.65824	1.31213	2.0843	5.30085	3.92915	3.20803	5.50931	-1.02774	2.63037	0.111527	5.16414	-0.895687	-1.59003	-0.299681	5.2304	4.1756	3.3567	4.7713	3.68813	1.81212	3.91095	2.30168	5.31315	3.61462
hsa-miR-449c-3p	2.08245	0.219502	5.86698	6.93802e-08	4.41589e-07	7.40707	UP	0.695846	-1.61738	2.67394	-1.57134	-1.67742	3.7401	2.23929	-1.52546	-1.67249	-1.74038	-1.30103	-1.11174	-1.57285	0.853209	-1.4164	-1.62845	-1.13091	3.13184	-1.68431	-1.66996	-1.35138	-1.04535	-0.792648	-1.55614	-0.862626	-1.02774	-1.50421	-1.64695	-1.48952	-0.895687	-1.59003	-0.299681	-1.64229	-1.40019	2.25239	-1.68781	-1.47576	2.29326	-0.878027	-1.39765	-1.4982	-1.2248
hsa-miR-4502	1.75317	-0.125939	5.47556	3.76573e-07	2.13697e-06	5.75534	UP	-0.25522	-1.61738	0.93522	2.34397	-0.0466593	-1.2376	-1.55063	-1.52546	-1.11174	-1.74038	-1.30103	-1.11174	-1.57285	-1.64433	-1.4164	-1.62845	-1.13091	-1.02947	-1.68431	4.04535	-1.35138	-1.04535	-0.792648	3.89259	-0.862626	-1.02774	-1.50421	-1.64695	-1.48952	-0.895687	-1.59003	-0.299681	-1.64229	-1.40019	-1.47975	-1.68781	-1.47576	-1.5912	-0.878027	-1.39765	-1.4982	-1.2248
hsa-miR-4503	-1.13652	-0.18879	-2.45875	0.0158151	0.0312043	-4.3456	DOWN	-0.882703	-1.61738	4.34136	-1.57134	1.61907	3.90121	6.14909	2.75	4.36103	-1.74038	-1.30103	-1.11174	0.941725	3.99804	-1.4164	2.56656	3.25203	3.95934	-1.68431	-1.66996	-1.35138	-1.04535	-0.792648	-1.55614	5.69012	-1.02774	-1.50421	-1.64695	-1.48952	-0.895687	1.88351	-0.299681	-0.353934	3.64677	-1.72575	-1.68781	1.525	-1.5912	-0.878027	-1.39765	-1.4982	-1.2248
hsa-miR-4504	-1.08037	-0.721889	-2.97876	0.00370136	0.00881521	-3.03013	DOWN	-1.30715	-1.61738	-1.58516	3.72325	-1.67742	-1.2376	-1.55063	3.88879	-1.06435	0.56533	-1.30103	-1.11174	-1.57285	-1.64433	-1.4164	-1.62845	-1.13091	-1.02947	-1.68431	5.8879	4.2996	2.84613	-0.792648	-1.55614	3.86085	-1.02774	-1.50421	-1.64695	-1.48952	-0.895687	-1.59003	6.23753	3.01742	-1.40019	-1.72575	-1.68781	3.08538	-1.5912	-0.878027	-1.39765	-1.4982	-1.2248
hsa-miR-4506	2.91098	1.2679	6.67359	1.85039e-09	1.55614e-08	10.962	UP	4.7452	-1.61738	5.38632	-1.57134	0.406577	-1.2376	5.43067	-1.52546	2.3724	3.90575	-1.30103	-1.11174	3.77166	1.49877	-1.4164	-1.62845	-1.13091	-1.02947	-1.68431	-1.66996	4.0404	4.00015	-0.792648	-1.55614	-0.862626	-1.02774	-1.50421	-1.64695	-1.48952	-0.895687	1.83974	-0.299681	-1.64229	-1.40019	-0.881044	-0.634209	1.47052	-1.5912	-0.878027	-1.39765	-1.4982	-1.2248
hsa-miR-4507	1.60712	5.59251	5.85522	7.305e-08	4.6151e-07	7.35666	UP	5.57251	6.14909	5.44056	5.72797	5.75103	5.3505	4.14745	5.11943	4.84556	5.26743	5.63131	5.53677	3.89466	5.20132	5.29646	5.96637	5.1842	5.46881	5.75103	4.76751	6.5203	-1.04535	5.55667	4.67413	4.07065	5.44298	5.79335	5.31315	5.49879	4.15952	5.45105	-0.299681	5.45567	5.4264	5.84604	5.02788	5.80213	4.30556	4.62058	4.62259	3.80931	3.39475
hsa-miR-450a-5p	-1.75789	0.626698	-4.25662	4.99712e-05	0.000184161	1.02607	DOWN	-1.52971	4.053	4.9977	3.52029	2.04778	3.68813	1.51154	-1.52546	2.03784	0.248527	4.57232	-1.11174	3.27034	4.129	2.22623	4.57232	-1.13091	-1.02947	1.82044	1.90057	-1.35138	-1.04535	3.72973	-1.55614	3.37069	-1.02774	1.3472	-1.64695	2.64216	-0.895687	-1.59003	-0.299681	1.83727	2.62262	1.90057	2.05687	3.02289	2.90536	4.0404	4.70812	-1.4982	3.17466
hsa-miR-4514	-1.96616	0.948129	-4.26439	4.8543e-05	0.000180715	1.05385	DOWN	3.73622	-1.61738	1.58354	-1.57134	4.20836	4.33098	2.00302	3.90348	1.58197	2.97371	-1.30103	-1.11174	3.41834	3.78465	-1.4164	4.74147	-1.13091	-1.02947	4.43327	0.953407	5.2831	-1.04535	4.81749	1.51622	-0.862626	-1.02774	5.34164	4.32516	-1.48952	-0.895687	1.17603	-0.299681	-1.64229	4.68454	4.49146	3.74231	5.14291	2.8933	3.85204	5.03182	3.60755	-1.2248
hsa-miR-4515	-2.80007	5.55509	-9.97533	2.60014e-16	5.58465e-15	26.5617	DOWN	7.15402	6.81018	6.0678	3.91634	5.84262	7.40465	7.3918	6.87915	6.55022	8.11321	5.57881	5.49271	5.96637	6.18622	5.45105	5.86836	5.79908	7.49043	7.76955	5.26281	7.93879	9.62142	7.67475	7.14311	6.23286	6.11895	6.58638	6.96888	7.49609	6.20085	6.58638	7.33187	7.12032	8.40616	5.98767	7.25001	7.67475	6.36559	6.20085	5.93112	6.44729	7.18981
hsa-miR-4519	-1.47658	2.19311	-3.3171	0.00130398	0.00352446	-2.06341	DOWN	3.98303	0.624571	4.10651	5.02985	-1.2248	4.47604	4.42279	3.3259	1.03745	4.27735	3.48763	4.16751	4.28789	3.11537	4.79222	3.52986	3.04634	-1.02947	1.69945	-1.66996	5.30288	4.36964	4.63135	3.90121	5.21668	4.81976	2.61393	0.224857	2.99526	-0.895687	-1.59003	5.35727	4.23237	2.61393	2.59251	2.08978	4.34893	-1.5912	3.70231	2.98621	5.59536	3.08953
hsa-miR-451a	-5.55496	6.51045	-12.5768	1.09192e-21	5.18664e-20	38.8472	DOWN	8.77752	8.14455	8.79879	9.1904	10.8158	10.2336	9.45357	10.0649	9.73687	8.06824	7.65835	8.30041	9.92015	9.40156	9.03273	9.25742	8.38262	8.12968	10.4497	9.77368	8.91338	9.31216	9.40156	8.93752	7.17757	9.56193	9.38092	9.42808	9.25742	8.15984	11.354	6.17014	8.3153	8.79879	7.53713	7.56092	10.852	10.124	9.67509	10.2119	8.77752	8.56758
hsa-miR-452-5p	-1.15723	0.34565	-2.51973	0.0134707	0.0271212	-4.20254	DOWN	0.49133	-1.61738	3.60184	-1.57134	1.66545	5.3693	1.37555	-1.52546	0.0965275	0.77011	-1.30103	-1.11174	-1.57285	5.046	-1.4164	3.65654	-1.13091	4.56605	4.73716	-1.66996	-1.35138	5.3218	-0.792648	-1.55614	-0.862626	-1.02774	-1.50421	-1.64695	1.83974	-0.895687	-1.59003	-0.299681	-0.547077	3.36188	-1.72575	1.70463	1.43053	-1.5912	4.95574	-1.39765	3.43568	3.03221
hsa-miR-4520-2-3p	-2.22722	-0.0203367	-5.46148	3.99824e-07	2.25892e-06	5.69695	DOWN	-1.28317	-1.61738	-1.58516	3.53471	-0.323736	-1.2376	2.07447	2.06435	2.19831	2.5452	5.12412	2.83188	-1.57285	1.51622	3.40469	-1.62845	4.05491	-1.02947	-1.68431	0.0898956	-1.35138	3.75095	4.00496	-1.55614	-0.862626	-1.02774	-1.50421	3.27738	5.04095	-0.895687	3.09211	7.15402	-0.0695385	-1.40019	-1.72575	2.13503	2.32436	3.07299	4.49698	-1.39765	3.60184	5.1473
hsa-miR-4520-5p	1.06138	-0.215694	2.96072	0.0039048	0.00923967	-3.0793	UP	-1.62538	-1.61738	-1.58516	-1.57134	-1.67742	-1.2376	-1.55063	-1.52546	-1.67249	-1.74038	-1.30103	3.73399	-1.57285	-1.64433	-1.4164	-1.62845	-1.13091	-1.02947	-0.658176	-1.66996	-1.35138	-1.04535	-0.792648	1.09846	-0.862626	3.58552	-1.50421	-0.454253	-1.48952	-0.895687	-1.59003	-0.299681	-1.64229	3.86085	-1.22036	-1.68781	-1.47576	4.44907	-0.878027	-1.39765	-1.4982	-1.2248
hsa-miR-4524b-5p	-1.37304	0.692439	-2.99978	0.00347673	0.00835783	-2.97255	DOWN	2.00758	2.40107	-1.58516	-1.57134	-1.67742	2.43436	2.9121	-1.52546	2.29001	-1.74038	4.65009	-1.11174	-1.57285	2.04532	2.98173	3.64018	-1.13091	3.57992	2.27046	-1.66996	-1.35138	-1.04535	-0.792648	-1.55614	-0.862626	4.43089	4.61148	1.85033	3.75724	-0.895687	0.624571	5.86246	0.326187	-1.40019	0.442791	1.56813	-1.47576	-1.5912	4.19143	5.55147	2.12038	3.97823
hsa-miR-4525	-2.7324	9.93222	-12.1955	6.47853e-21	2.55653e-19	37.0802	DOWN	11.4032	9.92015	10.852	10.7779	9.7082	11.1223	12.5455	10.7779	11.0816	12.7487	9.25742	8.46324	10.124	10.7434	10.8929	11.2585	8.70052	10.3314	12.3666	10.3752	11.354	13.1133	12.6586	10.7023	10.8158	14.1023	11.1223	12.9391	13.8037	11.6541	10.7779	12.5455	10.0864	13.4131	10.5228	10.9305	10.6687	10.9305	10.124	10.3314	9.96364	11.6117
hsa-miR-4526	1.61132	4.16497	4.20728	6.00364e-05	0.000216587	0.850358	UP	4.59748	4.9221	3.63779	5.8879	5.20349	-1.2376	4.06599	2.44545	4.54855	4.14943	2.74347	4.97031	5.24823	5.4264	4.42903	4.50727	-1.13091	5.44056	4.98921	2.4051	-1.35138	4.39029	5.47125	3.30875	4.91247	-1.02774	2.42905	4.50538	3.68542	4.25892	-1.59003	6.48286	2.27234	2.97371	2.62788	5.60142	3.86333	2.27046	-0.878027	-1.39765	3.84709	5.09605
hsa-miR-4529-5p	-2.29344	1.71309	-4.61611	1.26547e-05	5.30383e-05	2.34626	DOWN	5.42101	1.48091	2.36484	5.16924	1.55073	3.85591	5.61329	3.23526	0.812615	3.50599	-1.30103	-1.11174	1.19333	4.80118	5.82398	6.11895	3.70231	-1.02947	5.54723	2.69035	5.77132	4.94344	-0.792648	-1.55614	-0.862626	6.0977	3.88165	4.93738	5.52245	-0.895687	4.14305	-0.299681	-1.64229	-1.40019	3.64257	3.61829	5.4454	6.99204	4.22029	4.14943	3.56125	-1.2248
hsa-miR-4530	1.49454	9.59934	13.4633	1.84531e-23	1.24559e-21	42.896	UP	9.05529	9.16725	8.53959	9.31216	9.40156	8.68331	9.07915	8.9811	9.03273	8.53147	9.28653	9.03273	8.96025	8.8637	9.09969	8.88636	9.28653	9.38092	8.96025	8.91338	8.9811	8.39767	8.36458	8.38262	8.91338	9.1904	8.69191	8.82188	8.36458	8.32435	8.99441	8.75704	8.53147	8.88636	9.1184	8.93752	9.33621	9.1184	8.93752	9.09969	9.03273	8.96025
hsa-miR-4531	-2.01332	1.47282	-4.26082	4.9194e-05	0.000181819	1.04109	DOWN	5.19915	0.774725	0.868582	2.7853	3.26026	4.87073	4.43089	-1.52546	0.35156	3.66754	-1.30103	4.49698	5.07468	4.51676	5.3172	4.24223	-1.13091	-1.02947	4.72855	-1.66996	4.2481	4.03471	-0.792648	1.68984	-0.862626	4.39029	5.17397	3.49018	5.25267	-0.895687	4.79463	-0.299681	-0.202989	-1.40019	4.7579	3.07716	3.93115	5.98767	-0.878027	4.141	3.82644	4.0822
hsa-miR-4532	-1.90005	12.4345	-9.27932	7.56157e-15	1.31942e-13	23.2206	DOWN	12.6001	14.1023	12.8026	12.8487	14.1023	12.991	12.9391	12.5455	12.0097	12.8026	12.3666	12.7074	12.6001	13.0478	13.1891	12.9391	12.3666	11.9596	12.6586	13.8037	12.2004	12.8487	14.1023	14.1023	13.4131	11.5144	9.56193	10.4861	13.6352	11.0266	13.6352	14.9147	14.9147	14.9147	14.9147	14.1023	14.1023	14.9147	11.5659	13.8037	13.4131	14.9147
hsa-miR-4536-5p	-1.12453	-0.832072	-3.84275	0.000223725	0.000718215	-0.403525	DOWN	0.124615	-1.61738	-1.58516	3.33179	-1.67742	-1.2376	-1.55063	-1.52546	-0.576214	-1.74038	-1.30103	3.73399	-1.57285	1.82044	-1.4164	-1.62845	-1.13091	-1.02947	-1.35314	-0.0695385	-1.35138	-1.04535	-0.792648	-1.55614	-0.862626	2.85211	2.14205	1.22046	-1.48952	-0.895687	-1.59003	-0.299681	-1.64229	-1.40019	1.24264	-1.68781	3.32364	4.98921	-0.878027	2.27919	-1.4982	-1.2248
hsa-miR-4538	-1.64053	3.01424	-3.73129	0.000329601	0.00102725	-0.770655	DOWN	5.36714	4.98921	5.37875	5.49879	5.21185	-1.2376	1.70463	5.36714	4.05491	5.4611	5.11943	2.71102	4.66341	4.87703	5.05926	5.60429	4.89671	5.11516	5.33051	-0.344143	6.37297	-1.04535	-0.792648	4.82203	-0.862626	3.14779	4.48491	3.1657	3.18799	5.96637	3.7972	-0.299681	2.31832	4.98533	5.54723	5.71123	5.51466	1.38604	4.87295	4.63135	5.06629	4.53457
hsa-miR-4540	1.79243	0.115445	4.77593	6.73845e-06	2.98517e-05	2.95466	UP	-1.46563	-1.61738	-1.58516	1.86419	0.707022	-1.2376	-1.55063	-1.52546	-1.03133	1.68531	-1.30103	-1.11174	-1.57285	-1.64433	-1.4164	-1.62845	-1.13091	-1.02947	-1.17585	6.11156	4.44701	4.82203	-0.792648	2.59251	-0.862626	-1.02774	-1.50421	-1.64695	-1.48952	-0.895687	-1.59003	-0.299681	-1.64229	-1.40019	-1.72575	-0.0414396	-1.47576	-1.5912	-0.878027	-1.39765	-1.4982	-1.2248
hsa-miR-4632-3p	2.08746	3.35207	5.41	4.97396e-07	2.7437e-06	5.48419	UP	3.64257	3.68271	4.42716	4.51676	4.23631	-1.2376	-1.55063	0.977846	2.74629	4.15952	2.12198	4.19143	4.7043	-0.292407	4.32516	1.48495	4.01491	5.25267	-1.68431	3.9181	4.43787	4.25235	4.13491	4.70621	5.68048	-1.02774	-1.50421	1.03246	-1.48952	-0.895687	4.49922	6.37297	4.2812	2.81063	3.42045	-1.68781	-1.47576	-1.5912	-0.878027	2.3771	2.53707	3.98303
hsa-miR-4633-3p	-2.83484	2.96714	-5.00955	2.62867e-06	1.24862e-05	3.86603	DOWN	5.65827	3.48321	5.96966	-1.57134	1.65575	-1.2376	-1.55063	5.57881	6.12799	7.41711	-1.30103	-1.11174	-1.57285	4.68812	-1.4164	2.69676	-1.13091	3.24132	6.0678	2.93965	7.40465	8.19187	7.81202	7.33187	5.90878	4.55407	5.97295	7.08269	6.32162	6.83223	-1.59003	4.58954	2.70529	7.46724	5.63699	5.37396	3.76695	5.47725	4.21205	3.49273	5.4611	5.19348
hsa-miR-4633-5p	-2.65422	2.47834	-6.34019	8.44315e-09	6.2773e-08	9.47083	DOWN	4.129	4.77593	2.21195	1.34189	-1.67742	6.57651	5.93112	4.86852	5.26743	5.08698	2.16581	-1.11174	5.04095	4.20646	2.24268	5.31315	3.2034	3.56989	5.85299	6.02871	3.72769	7.92502	5.11943	3.89259	-0.862626	-1.02774	5.02985	4.69985	4.36964	5.78769	0.312901	-0.299681	0.260297	3.8836	3.67607	3.56602	5.09192	1.70463	3.40886	5.00178	5.10547	3.81834
hsa-miR-4635	-3.26991	3.99678	-9.25872	8.35489e-15	1.44799e-13	23.1218	DOWN	5.14043	5.70507	5.70793	6.44729	5.49879	5.86541	8.09745	4.97031	5.95279	5.2096	6.38135	-1.11174	6.3076	6.43033	6.2739	6.0373	5.19915	6.23286	5.21668	5.4162	-1.35138	4.80118	5.10792	5.64678	5.48835	6.41195	5.75765	5.34827	6.02871	5.63388	5.48179	6.42208	5.89443	5.66751	5.5196	5.75765	5.76473	5.25724	7.17757	6.67492	5.3172	5.78769
hsa-miR-4644	1.11	-0.621608	4.37094	3.25114e-05	0.000126543	1.43834	UP	-1.68101	-1.61738	-1.58516	-1.57134	-1.67742	-1.2376	-1.55063	-1.52546	0.534703	1.45715	-1.30103	-1.11174	-1.57285	-0.165791	-1.4164	-1.62845	-1.13091	-1.02947	-1.68431	0.658231	-1.35138	-1.04535	-0.792648	-1.55614	-0.862626	-1.02774	-1.50421	-1.64695	-1.48952	-0.895687	-1.59003	-0.299681	0.764319	-1.40019	-1.72575	-1.31334	-1.47576	-1.5912	-0.878027	-1.39765	-1.4982	-1.2248
hsa-miR-4646-3p	1.42604	4.03716	3.77718	0.000281239	0.000889492	-0.620441	UP	2.5269	4.2933	4.60699	-1.57134	2.95459	-1.2376	2.08056	4.49698	5.27545	4.78769	-1.30103	4.98727	4.19498	4.47863	-1.4164	3.3259	4.52625	3.15579	5.00178	6.09448	4.51246	3.21173	-0.792648	5.4112	4.82981	2.95949	4.51676	5.51466	4.47346	5.34608	4.30164	5.22174	4.37348	4.27121	4.71637	3.35285	4.59308	0.338967	-0.878027	-1.39765	4.27324	4.89462
hsa-miR-4647	1.38867	-0.177596	3.88405	0.000193454	0.00063454	-0.2655	UP	0.827879	1.32473	-1.58516	3.49273	-1.67742	-1.2376	-1.55063	-1.52546	-0.85989	4.69265	-1.30103	-1.11174	-1.57285	-1.64433	-1.4164	-1.62845	-1.13091	-1.02947	-0.0466593	4.57011	-1.35138	-1.04535	-0.792648	-1.55614	-0.862626	-1.02774	-1.50421	-1.64695	-1.48952	-0.895687	-1.59003	-0.299681	-1.64229	-1.40019	-1.72575	-1.68781	-1.47576	-1.5912	-0.878027	-1.39765	-1.4982	-1.2248
hsa-miR-4648	4.24756	3.65076	10.2234	7.84284e-17	1.84559e-15	27.7505	UP	4.87891	1.19333	1.48091	4.4931	1.16878	4.23237	-1.55063	1.90284	-0.857264	3.51322	2.32863	-1.11174	4.13119	4.34504	4.77593	3.62309	5.30804	3.50599	-1.68431	-1.66996	4.80118	4.87703	-0.792648	5.27812	-0.862626	5.07002	3.47445	1.2086	-1.48952	4.93941	-1.59003	-0.299681	3.77588	-1.40019	0.384198	-0.713846	3.62309	-1.5912	-0.878027	-1.39765	4.53865	4.16947
hsa-miR-4649-3p	1.14607	3.35777	3.15066	0.0021989	0.00563455	-2.5494	UP	-0.178011	4.27735	4.82802	-1.57134	4.02153	4.0404	5.14538	4.5591	4.11366	2.6399	4.98921	4.25235	-1.57285	-0.372352	3.73177	3.35058	4.26533	4.99331	2.49177	3.94973	2.13503	5.01521	-0.792648	-1.55614	4.52151	3.77166	4.74704	-1.64695	3.78465	-0.895687	1.02696	-0.299681	3.5252	3.12784	4.70812	-0.854121	4.61865	3.04401	-0.878027	4.16947	3.95368	4.5814
hsa-miR-4650-3p	-2.57634	1.00881	-5.68596	1.52638e-07	9.20031e-07	6.63644	DOWN	4.86852	-1.61738	-1.58516	0.578011	3.7888	2.29651	5.19154	3.59038	5.33051	3.41834	4.37545	-1.11174	4.9073	4.63338	-1.4164	2.91714	4.1756	-1.02947	-1.68431	-0.503846	-1.35138	6.16264	4.78377	3.29504	-0.862626	4.10831	2.24268	1.88126	4.87295	4.08066	-1.59003	-0.299681	1.2017	-1.40019	3.86814	1.82436	3.09825	2.14055	4.52151	2.50442	1.46698	5.08698
hsa-miR-4652-5p	-3.64169	2.707	-8.00168	3.59265e-12	4.24661e-11	17.1197	DOWN	5.24823	4.26321	5.95279	1.58197	4.07065	2.63037	2.08978	4.51246	4.69265	5.64011	5.86836	-1.11174	1.73373	6.02186	3.67391	3.43766	-1.13091	5.2236	4.72855	4.23842	-1.35138	-1.04535	-0.792648	4.14745	4.56421	6.27774	5.94475	4.96822	8.53147	4.23237	5.2304	4.87703	4.74704	7.08269	5.75765	4.04287	5.98073	4.96342	4.74704	3.83049	5.99582	5.35727
hsa-miR-4653-3p	1.81424	-0.0678605	4.5309	1.76231e-05	7.19799e-05	2.02715	UP	2.62262	-1.61738	-1.58516	-1.57134	-1.67742	-1.2376	-1.55063	-1.52546	4.91247	4.5591	-1.30103	-1.11174	-1.57285	-1.64433	-1.4164	-1.62845	-1.13091	-1.02947	-1.68431	-1.66996	3.33942	-1.04535	-0.792648	-1.55614	-0.862626	-1.02774	-1.50421	-1.64695	-1.48952	-0.895687	-1.59003	-0.299681	-1.64229	-1.40019	-1.72575	-0.913769	-1.47576	-1.5912	-0.878027	-1.39765	-1.4982	-1.2248
hsa-miR-4655-3p	1.8698	3.16503	3.60475	0.000507263	0.00151294	-1.17779	UP	4.54441	7.10702	4.30914	-1.57134	6.06074	-1.2376	-1.55063	-1.52546	-1.67249	0.167736	-1.30103	5.57251	4.88949	4.50727	-1.4164	1.6678	-1.13091	-1.02947	-1.68431	-1.66996	-1.35138	-1.04535	3.97823	5.03631	4.5506	-1.02774	-1.50421	4.87703	-1.48952	-0.895687	6.67492	6.5462	5.20735	6.00901	6.40753	4.6246	5.59032	1.58511	-0.878027	3.62726	-1.4982	5.90878
hsa-miR-4658	-1.73605	2.4707	-3.69805	0.000369471	0.00114043	-0.878633	DOWN	3.36188	4.25023	5.74471	2.35653	3.99123	4.01956	6.0678	3.33179	2.22982	1.65871	-1.30103	-1.11174	-1.57285	0.933033	3.24649	4.04895	-1.13091	3.75529	5.15884	-0.146352	2.30403	-1.04535	4.31302	-1.55614	4.22433	5.74471	-1.50421	1.38604	6.11156	5.17397	2.36133	6.55424	4.00496	6.51142	1.88824	4.73053	4.95344	3.51096	3.46691	2.97137	5.49053	5.88175
hsa-miR-4659a-3p	-1.31532	0.00978022	-3.19359	0.00192496	0.00498741	-2.42597	DOWN	-1.59003	3.83486	-1.58516	0.592747	-1.67742	-1.2376	2.23929	2.13149	-1.67249	-1.17735	2.70815	-1.11174	-1.57285	0.845703	2.46643	3.02015	2.65031	-1.02947	-0.681077	-0.246516	-1.35138	-1.04535	-0.792648	2.37551	-0.862626	2.93238	-1.50421	-1.64695	-1.48952	5.25724	-1.59003	5.48179	-1.64229	-1.40019	-0.67044	1.31521	3.94143	4.5814	-0.878027	1.73373	1.75577	-1.2248
hsa-miR-466	1.7624	0.201167	4.66836	1.03116e-05	4.36457e-05	2.54377	UP	-1.74038	1.46197	0.812615	-1.57134	-1.67742	2.51198	1.04963	-1.52546	-1.67249	1.80609	-1.30103	-1.11174	-1.57285	1.08377	-1.4164	-0.107659	-1.13091	-1.02947	-1.1182	1.14479	-1.35138	-1.04535	-0.792648	-1.55614	-0.862626	-1.02774	-1.50421	3.35285	-1.48952	-0.895687	0.908879	-0.299681	-1.64229	-1.40019	-1.4833	-0.805797	-1.47576	0.510319	-0.878027	-1.39765	-1.4982	-1.2248
hsa-miR-4662a-5p	-1.0472	-0.693832	-2.85464	0.00532479	0.0121082	-3.3634	DOWN	-1.31044	-1.61738	-1.58516	-1.57134	-1.67742	-1.2376	-1.55063	-1.52546	-0.629044	3.2034	-1.30103	-1.11174	-1.57285	-1.64433	-1.4164	-1.62845	-1.13091	3.41444	-1.68431	6.29646	4.66785	5.62254	-0.792648	0.774725	-0.862626	-1.02774	-1.50421	4.42716	-1.48952	-0.895687	-1.59003	-0.299681	3.14779	-1.40019	3.10025	2.91423	-1.47576	-1.5912	-0.878027	-1.39765	-1.4982	-1.2248
hsa-miR-4663	-3.80169	3.4107	-8.18886	1.46448e-12	1.86885e-11	18.0069	DOWN	4.89671	2.04778	5.54723	0.840209	3.32137	5.72797	5.55667	5.27075	6.13841	5.16414	5.31315	5.1566	-1.57285	5.00664	4.11366	5.70221	3.08132	3.49018	6.92143	-1.66996	3.18799	5.92788	5.84947	6.28467	6.60634	6.23286	8.12968	6.92143	7.33187	5.11037	5.54441	-0.299681	4.37741	9.33621	6.08343	4.80959	6.17014	5.15436	4.5506	5.24823	6.79257	5.95946
hsa-miR-4664-5p	1.07333	4.25996	2.59843	0.0109081	0.0225277	-4.01341	UP	5.55147	4.85642	4.1756	5.09192	5.02788	-1.2376	5.74787	5.4112	5.08338	1.31213	5.13188	2.69676	4.62058	5.14921	5.15884	4.763	5.78769	6.20973	5.43558	-0.0754835	3.45734	-1.04535	-0.792648	-1.55614	-0.862626	5.29882	5.93112	5.57566	5.58468	5.60716	4.35658	-0.299681	-1.64229	2.02826	5.39673	5.16414	4.93041	4.7991	5.25724	4.67213	4.72662	3.38725
hsa-miR-4666a-3p	-1.24542	-0.487999	-3.29945	0.00137942	0.00371271	-2.11588	DOWN	-1.74038	-1.61738	-1.58516	0.582495	1.43631	-1.2376	-1.55063	-1.52546	3.62309	3.70231	-1.30103	5.22174	2.92925	-0.565374	4.73716	-1.62845	-1.13091	-1.02947	-1.68431	5.4611	3.99804	-1.04535	-0.792648	-1.55614	-0.862626	3.8232	-1.50421	-1.64695	-1.48952	-0.895687	2.04287	4.50135	1.52706	-1.40019	1.09566	0.574709	-1.47576	0.390121	-0.878027	-1.39765	-1.4982	-1.2248
hsa-miR-4666a-5p	-3.49854	0.974614	-8.17984	1.52933e-12	1.93238e-11	17.9641	DOWN	4.65205	4.38416	4.81749	1.12188	0.958802	-1.2376	-1.55063	5.01963	5.00421	4.43565	-1.30103	2.80429	-1.57285	3.83696	-1.4164	1.83238	3.41834	-1.02947	4.59131	3.16182	5.38632	5.71123	-0.792648	3.03425	3.83268	-1.02774	5.27075	3.78673	6.48783	4.01491	3.48763	-0.299681	-1.64229	2.1637	3.92302	0.750126	4.39029	5.85948	-0.878027	4.61148	3.24132	3.73177
hsa-miR-4668-3p	-1.2876	0.0415826	-3.08302	0.00270529	0.00673696	-2.74119	DOWN	-1.47437	1.25466	-1.58516	-1.57134	-1.67742	-1.2376	-1.55063	-1.52546	3.57992	0.8875	4.74888	-1.11174	-1.57285	3.07716	-1.4164	-1.62845	-1.13091	3.91457	-0.0513407	3.23829	-1.35138	-1.04535	-0.792648	4.80959	-0.862626	-1.02774	-1.50421	-0.22672	3.82644	5.97684	-1.59003	-0.299681	4.00015	-1.40019	3.42758	2.4363	-1.47576	0.639451	-0.878027	-1.39765	4.13119	3.85591
hsa-miR-4669	2.2232	2.1048	5.06119	2.12824e-06	1.02036e-05	4.07087	UP	3.7888	0.977846	1.96187	3.77377	2.37869	2.20291	-1.55063	-1.52546	-0.943396	-1.74038	-1.30103	-1.11174	2.50951	0.402868	3.23526	2.98173	2.67757	4.62058	0.630736	-1.66996	2.92525	-1.04535	-0.792648	-1.55614	6.80151	-1.02774	4.51676	2.58603	4.56605	-0.895687	2.11035	-0.299681	-0.57178	-1.40019	4.54441	3.91095	3.24649	-1.5912	-0.878027	-1.39765	-1.4982	-1.2248
hsa-miR-4671-5p	-1.02871	-0.78665	-3.14837	0.00221455	0.00566898	-2.55597	DOWN	0.384198	-1.61738	-1.58516	-1.57134	-0.98256	-1.2376	-1.55063	-1.52546	1.26198	-1.53653	-1.30103	-1.11174	-1.57285	0.0852912	-1.4164	-1.62845	-1.13091	3.80931	4.22623	6.93345	-1.35138	-1.04535	-0.792648	2.52165	-0.862626	-1.02774	-1.50421	2.8402	-1.48952	4.74888	-1.59003	-0.299681	0.823099	-1.40019	1.9853	-1.68781	-1.47576	-1.5912	-0.878027	-1.39765	2.8402	-1.2248
hsa-miR-4674	1.03024	9.8506	6.31227	9.57622e-09	7.03811e-08	9.34726	UP	10.6306	9.88389	11.2075	8.3153	10.124	9.1184	9.1904	8.96025	9.36865	10.7023	9.88389	11.3067	10.7023	10.2934	9.73687	9.81192	10.6306	9.53385	9.05529	9.1904	8.66289	8.91338	10.6306	10.3752	8.23813	8.20061	7.89342	8.53147	8.88636	8.42145	8.53147	7.7263	8.68331	10.2552	8.5477	8.46324	10.3314	9.05529	8.70052	9.40156	8.74826	8.39767
hsa-miR-4679	-1.46345	-0.354904	-3.7192	0.000343606	0.00106701	-0.810016	DOWN	-1.61181	1.62809	-1.58516	-1.57134	-1.67742	-1.2376	2.3771	3.02726	-0.868879	0.217566	-1.30103	3.33179	4.29757	-1.64433	-1.4164	-1.62845	-1.13091	-1.02947	0.173187	-0.120967	3.35058	-1.04535	-0.792648	-1.55614	-0.862626	4.53457	3.5252	-1.64695	2.7853	-0.895687	4.78769	-0.299681	-1.64229	-1.40019	0.989956	-1.68781	-1.47576	2.92525	5.45567	3.37069	-1.4982	3.06265
hsa-miR-4680-3p	-1.19277	-0.75982	-3.50957	0.000697193	0.0019981	-1.47708	DOWN	-1.74038	-1.61738	-1.58516	-1.57134	-1.67742	-1.2376	-1.55063	-1.52546	-1.67249	1.95035	-1.30103	-1.11174	-1.57285	-1.64433	-1.4164	0.529099	-1.13091	4.24392	0.758319	5.17397	-1.35138	3.62726	-0.792648	1.30253	-0.862626	-1.02774	-1.50421	3.93115	-1.48952	7.3918	-1.59003	-0.299681	-1.64229	-1.40019	-0.87544	-1.26786	3.36188	0.6135	-0.878027	2.64216	-1.4982	-1.2248
hsa-miR-4681	1.46619	0.319912	3.7205	0.000342068	0.00106352	-0.805773	UP	2.49177	-1.61738	-1.58516	-1.57134	1.49607	-1.2376	-1.55063	2.84912	-1.67249	-1.08298	3.30551	-1.11174	-1.57285	1.86618	1.73879	2.48587	-1.13091	-1.02947	2.62051	0.496956	-1.35138	-1.04535	-0.792648	-1.55614	-0.862626	-1.02774	-1.50421	0.0704121	-1.48952	-0.895687	3.83049	-0.299681	-1.64229	-1.40019	0.799462	-1.68781	-1.47576	-1.5912	-0.878027	-1.39765	-1.4982	2.81844
hsa-miR-4682	3.3687	1.24651	9.19523	1.13633e-14	1.95617e-13	22.817	UP	0.224857	-1.61738	-1.58516	-1.57134	-0.711786	-1.2376	-1.55063	1.54892	1.27837	-1.74038	-1.30103	-1.11174	-1.57285	2.76771	-1.4164	-1.62845	-1.13091	-1.02947	-1.20904	-1.66996	-1.35138	-1.04535	-0.792648	3.96854	-0.862626	-1.02774	-1.50421	-0.0192363	-1.48952	-0.895687	1.26198	-0.299681	-0.00452747	4.7452	2.0843	4.59998	-1.47576	-1.5912	-0.878027	-1.39765	-1.4982	-1.2248
hsa-miR-4684-3p	1.24372	2.1234	2.77764	0.00663734	0.0147019	-3.5642	UP	3.96113	1.21649	3.18466	4.03248	3.00416	-1.2376	5.53384	4.49146	-0.917824	0.871286	3.52274	-1.11174	3.28353	-0.544819	3.75529	3.14271	4.23631	3.62069	2.37551	-1.66996	3.59038	-1.04535	-0.792648	-1.55614	3.3259	-1.02774	3.77377	3.93931	-1.48952	-0.895687	2.17794	-0.299681	1.12945	-1.40019	4.50135	2.12198	3.97583	1.66168	-0.878027	4.00323	-1.4982	-1.2248
hsa-miR-4685-3p	2.17413	3.90267	5.77747	1.02591e-07	6.32563e-07	7.02462	UP	4.39029	4.85642	3.0674	4.62058	4.15952	-1.2376	-1.55063	5.2304	3.98714	5.49879	4.7208	4.99331	3.33179	5.40174	2.62262	1.93035	4.22433	-1.02947	4.67213	3.07508	4.84556	3.67607	4.15141	1.61565	-0.862626	3.93931	-1.50421	3.16182	2.93965	-0.895687	5.31518	-0.299681	1.60689	4.84556	5.07468	4.16751	4.64627	2.04778	-0.878027	4.38655	-1.4982	-1.2248
hsa-miR-4691-5p	1.16881	2.8701	2.67806	0.00877198	0.0187034	-3.81698	UP	4.02559	3.75724	5.30546	-1.57134	4.87703	5.85651	3.02289	-1.52546	0.772418	1.91989	-1.30103	-1.11174	-1.57285	2.60512	-1.4164	3.29834	5.02579	-1.02947	5.43067	1.82436	-1.35138	-1.04535	-0.792648	1.90057	5.046	-1.02774	2.46643	5.57566	4.353	3.6039	2.98621	-0.299681	3.43766	-1.40019	4.15141	5.07235	3.85591	0.435341	-0.878027	2.22982	5.53091	5.26743
hsa-miR-4693-3p	-1.4918	-0.538635	-3.98266	0.000136192	0.000465776	0.0683257	DOWN	-0.652044	-1.61738	-1.58516	-1.57134	-1.06204	-1.2376	2.93552	-1.52546	-1.67249	-0.868879	-1.30103	-1.11174	0.849456	-1.64433	4.34893	3.73622	-1.13091	-1.02947	0.399407	-1.66996	3.09469	-1.04535	-0.792648	-1.55614	-0.862626	4.30914	5.09399	4.11216	-1.48952	-0.895687	2.8661	-0.299681	-1.64229	4.99551	-0.629044	-1.68781	2.24268	5.48835	-0.878027	-1.39765	-1.4982	-1.2248
hsa-miR-4693-5p	-1.12355	-0.567963	-3.08581	0.00268242	0.006693	-2.73334	DOWN	2.46123	0.333286	-1.58516	-1.57134	-1.67742	-1.2376	1.87164	-1.52546	-0.298	-1.58368	-1.30103	-1.11174	-1.57285	-1.64433	-1.4164	3.55618	-1.13091	-1.02947	-1.68431	-1.66996	-1.35138	4.9221	4.07912	-1.55614	-0.862626	-1.02774	-1.50421	1.57087	-1.48952	-0.895687	2.24268	4.68812	3.00653	-1.40019	3.68813	-0.351626	-1.47576	-1.5912	-0.878027	4.26109	-1.4982	2.98621
hsa-miR-4694-5p	-1.93875	0.832853	-4.15731	7.22044e-05	0.000258665	0.673828	DOWN	4.90488	-1.61738	-1.58516	4.00323	-1.67742	-1.2376	2.25984	3.90348	5.17397	2.47834	-1.30103	-1.11174	-1.57285	4.85412	2.86909	2.62262	-1.13091	-1.02947	3.54826	1.96377	5.77757	5.84262	5.05182	4.7579	-0.862626	-1.02774	-1.50421	-1.64695	4.18352	4.81346	1.24084	-0.299681	0.529099	-1.40019	0.604099	0.899604	3.57992	2.34397	4.79222	3.61829	3.10451	4.72469
hsa-miR-4695-3p	2.05191	3.97668	4.76749	6.96844e-06	3.07114e-05	2.92222	UP	4.7713	4.99331	-1.58516	-1.57134	3.74856	-1.2376	-1.55063	3.36582	3.7401	2.94191	3.87047	5.51713	4.66785	4.62931	-1.4164	4.48696	4.68812	4.55234	3.79535	4.23237	6.68048	3.77588	-0.792648	5.30288	5.01312	2.81844	-1.50421	3.71288	5.05674	4.39456	-1.59003	-0.299681	5.04891	4.18536	4.42903	4.91689	4.84196	-1.5912	3.48763	-1.39765	5.25724	3.15579
hsa-miR-4696	-1.35021	-0.643662	-4.02036	0.000118923	0.00041055	0.197497	DOWN	-1.74038	-1.61738	-1.58516	-1.57134	1.89469	2.27234	1.88126	-1.52546	-1.67249	1.52912	-1.30103	-1.11174	4.07434	-1.64433	-1.4164	-1.62845	-1.13091	-1.02947	1.66545	-1.66996	2.08978	-1.04535	-0.792648	-1.55614	-0.862626	-1.02774	4.78213	-1.64695	3.89259	-0.895687	4.22813	-0.299681	-1.64229	-1.40019	-1.47576	2.36484	2.12198	3.55618	-0.878027	-1.39765	-1.4982	3.7401
hsa-miR-4698	1.48608	3.88216	3.60991	0.000498513	0.00149031	-1.16139	UP	5.40174	4.34699	5.79621	-1.57134	4.50727	5.09819	1.68056	4.1634	4.81153	7.01285	5.28078	6.44729	5.74196	2.32863	3.91276	0.704467	5.29882	3.94143	3.05152	-0.973484	4.19143	6.43845	-0.792648	2.84613	5.20349	-1.02774	1.1578	3.10025	-1.48952	3.87505	5.16414	4.5679	0.645945	4.50727	4.12252	5.06629	4.59748	-1.5912	-0.878027	4.13491	1.43053	-1.2248
hsa-miR-4700-3p	1.6589	3.69905	4.75895	7.20917e-06	3.17179e-05	2.8894	UP	2.92004	4.71637	4.21021	4.81749	4.30556	5.3106	3.87505	5.48179	1.57569	4.17751	4.44009	3.52986	4.9221	4.6246	3.48763	3.13725	4.00323	-1.02947	-0.871857	4.01491	4.56165	-1.04535	4.19143	-1.55614	-0.862626	3.81377	5.11943	3.70569	-1.48952	-0.895687	5.11943	-0.299681	4.46662	2.0183	4.57232	2.92265	4.44009	2.85211	-0.878027	1.77833	3.22432	-1.2248
hsa-miR-4700-5p	-2.07881	2.53986	-4.95537	3.27674e-06	1.53094e-05	3.65242	DOWN	4.96005	4.58954	0.868582	-1.57134	4.10071	3.67391	3.3567	5.70221	1.51154	4.68245	3.42256	2.97604	4.27927	4.70812	5.37645	3.03898	4.50348	4.69587	5.07916	3.24926	4.95574	3.51096	-0.792648	3.07019	-0.862626	5.68357	4.65402	5.47125	4.85642	-0.895687	4.88317	-0.299681	1.47624	5.43807	4.25675	1.97984	6.53024	6.91016	4.75389	3.64257	3.36188	2.57635
hsa-miR-4701-3p	1.96536	1.41211	4.35756	3.41996e-05	0.000132311	1.38974	UP	-1.05505	-1.61738	4.59528	4.11515	-1.67742	-1.2376	-1.55063	1.45411	0.0827912	-0.0695385	-1.30103	-1.11174	4.00668	-1.64433	-1.4164	3.96854	-1.13091	-1.02947	-1.68431	-1.66996	-1.35138	-1.04535	-0.792648	1.24084	3.82482	-1.02774	2.25441	3.65654	2.07862	-0.895687	3.88879	-0.299681	1.90942	3.24132	0.71633	-1.68781	-1.47576	-1.5912	-0.878027	1.75995	-1.4982	-1.2248
hsa-miR-4701-5p	1.41315	4.01271	4.38244	3.11236e-05	0.000121695	1.48023	UP	4.1171	4.44907	0.726429	4.93041	4.02153	2.89996	4.7713	3.53471	4.7579	4.88949	5.5043	4.43565	4.41776	3.15881	4.0822	4.51246	4.95114	-1.02947	4.37959	3.94355	-1.35138	4.53457	5.19348	4.53081	4.59748	-1.02774	5.2941	4.73251	4.01956	3.16791	0.529099	-0.299681	5.2236	3.10224	4.71235	3.16182	4.82623	-1.5912	-0.878027	2.20943	4.85873	5.51466
hsa-miR-4705	-1.54347	-0.462587	-3.97385	0.000140562	0.00047812	0.0382523	DOWN	3.51096	0.183571	1.18685	1.54892	2.08978	3.17011	2.64216	-1.52546	-1.67249	-1.16244	-1.30103	-1.11174	-1.57285	-1.64433	-1.4164	-1.62845	-1.13091	-1.02947	-0.0754835	-1.66996	8.26824	-1.04535	-0.792648	-1.55614	-0.862626	4.56421	-1.50421	-1.64695	-1.48952	-0.895687	4.14943	-0.299681	-1.64229	-1.40019	-1.72575	4.21604	4.48491	3.92099	-0.878027	-1.39765	-1.4982	3.73622
hsa-miR-4708-3p	-3.00821	7.21816	-13.5911	1.03216e-23	7.35416e-22	43.4723	DOWN	9.56193	7.8257	8.5151	8.39767	7.26191	10.6306	9.31216	8.44376	8.44376	10.852	8.84558	7.81202	7.08269	8.12968	8.1753	8.53147	7.76955	8.15984	9.25742	7.35304	9.28653	10.9305	9.16725	7.23842	8.75704	8.30041	9.53385	9.16725	9.88389	9.05529	7.77692	7.9979	6.50222	9.77368	8.38262	8.09745	8.77752	9.23212	7.36533	7.70108	8.1753	7.85325
hsa-miR-4708-5p	1.52179	3.4217	4.31508	4.0143e-05	0.000152318	1.236	UP	4.47863	4.80516	2.52165	3.17011	1.91809	-1.2376	2.62262	1.53657	1.56342	4.32888	4.16751	4.48074	-1.57285	5.64011	2.02422	4.35097	4.96822	-1.02947	-0.779989	4.45134	2.73163	2.94416	-0.792648	3.91457	3.79915	3.11287	4.33924	3.82847	-1.48952	5.4264	2.4051	6.41637	-1.64229	4.01491	3.75529	3.3567	2.54823	0.747659	-0.878027	3.23526	1.83727	-1.2248
hsa-miR-4710	-1.42826	7.06303	-5.77447	1.03942e-07	6.39355e-07	7.01184	DOWN	8.25386	6.83223	7.01285	6.98067	5.91648	7.08269	6.08343	7.26191	7.57286	9.23212	6.7822	4.38178	5.87819	5.23505	5.75765	7.47827	6.24615	7.85325	8.48088	7.79096	7.83932	11.2075	9.56193	8.46324	6.86776	7.05858	9.1184	9.28653	9.28653	7.09342	8.30041	6.82007	7.46724	9.16725	7.47827	7.44288	8.68331	8.34714	7.35304	7.23842	6.83223	7.95247
hsa-miR-4712-5p	1.35906	-0.468742	4.7095	8.76859e-06	3.78007e-05	2.70024	UP	-1.48671	-1.61738	-1.58516	-1.57134	-1.67742	-1.2376	-1.55063	-1.52546	1.39509	-1.52051	2.06241	-1.11174	-1.57285	-1.64433	-1.4164	-1.62845	-1.13091	-1.02947	-1.68431	-0.410275	-1.35138	-1.04535	-0.792648	-1.55614	-0.862626	-1.02774	-1.50421	-1.64695	-1.48952	-0.895687	-1.59003	-0.299681	-1.64229	-1.40019	-1.72575	-0.231379	-1.47576	-1.5912	-0.878027	-1.39765	-1.4982	-1.2248
hsa-miR-4713-3p	-2.11018	2.12086	-5.49472	3.47061e-07	1.97825e-06	5.8349	DOWN	4.07434	3.81605	1.81212	3.75095	3.87047	2.73395	2.88748	3.50847	0.871286	4.46426	6.0524	-1.11174	3.95368	4.58954	4.27324	2.28507	5.25267	4.83376	4.38655	3.20988	-1.35138	4.69786	-0.792648	2.00302	-0.862626	3.30163	4.65402	5.10547	5.00178	6.55424	3.74453	5.7392	3.93517	2.19831	1.92169	-0.805797	4.17352	1.69945	-0.878027	3.88879	3.43568	4.79222
hsa-miR-4713-5p	1.79458	3.90433	5.07665	1.99746e-06	9.66939e-06	4.13241	UP	4.79222	4.43787	4.68245	4.5591	4.83376	5.8104	3.73622	4.0822	-0.905725	5.17936	4.49475	5.43067	4.24223	1.85352	3.83268	4.63807	-1.13091	-1.02947	3.83486	1.21649	2.3339	-1.04535	-0.792648	4.27735	-0.862626	-1.02774	4.73716	4.78573	2.95053	3.94568	5.03631	-0.299681	-1.64229	4.9221	4.65009	5.01102	4.97241	3.78465	-0.878027	3.1657	3.10451	4.39029
hsa-miR-4714-5p	1.68888	1.55458	3.88079	0.00019569	0.000641055	-0.276416	UP	1.37287	3.74856	-1.58516	-1.57134	-1.67742	-1.2376	3.52986	-1.52546	3.6039	-1.74038	-1.30103	-1.11174	-1.57285	1.58354	-1.4164	1.31521	-1.13091	-1.02947	2.95704	2.02126	-1.35138	-1.04535	-0.792648	4.41776	4.40391	-1.02774	1.05151	4.11905	-1.48952	3.22693	-1.59003	-0.299681	3.21173	2.57635	-1.72575	0.758319	-1.47576	3.75724	-0.878027	-1.39765	5.22546	4.67612
hsa-miR-4716-5p	1.42201	4.46835	4.03756	0.000111762	0.00038739	0.256708	UP	4.14305	5.28078	5.11516	4.54649	4.30914	3.52274	-1.55063	-1.52546	4.53081	3.4337	4.03471	4.51676	4.5506	5.11943	3.54051	4.57938	5.08518	5.28542	5.93112	-0.114846	-1.35138	5.4137	4.87703	5.11277	5.72797	4.53081	5.00883	5.01312	3.04167	-0.895687	1.76451	5.44298	5.57251	3.94568	4.86136	9.67509	4.50348	1.78054	-0.878027	1.86618	4.69587	2.89996
hsa-miR-4717-3p	2.53922	3.06169	5.79036	9.69894e-08	5.99465e-07	7.07951	UP	7.5137	2.00071	4.69587	2.5316	4.80118	3.65096	-1.55063	1.9424	4.87295	4.85873	-1.30103	3.85204	-1.57285	4.053	-1.4164	5.69608	4.5814	4.67612	3.63779	-1.66996	2.84613	-1.04535	-0.792648	2.555	-0.862626	-1.02774	3.39914	0.395945	2.82491	-0.895687	-1.59003	-0.299681	3.67007	2.69412	4.78377	3.86581	-1.47576	3.12984	-0.878027	-1.39765	2.0548	-1.2248
hsa-miR-4718	-3.46366	6.83657	-12.3252	3.53059e-21	1.53491e-19	37.6826	DOWN	8.27644	8.11321	8.96025	7.5137	7.05858	11.0266	8.77752	8.42824	8.84558	10.2552	6.88926	6.67492	7.14311	7.31996	7.8257	8.73948	6.64488	8.11321	9.14214	8.5151	9.21022	11.0266	9.14214	8.3153	7.25001	7.85963	9.40156	9.88389	10.0864	8.82188	7.71505	8.32435	6.48783	9.25742	7.29533	7.90949	8.3334	7.85325	7.44288	7.65198	8.12968	7.90949
hsa-miR-4719	-1.87065	-0.18676	-4.90855	3.96018e-06	1.82368e-05	3.46891	DOWN	-1.45891	2.75292	-1.58516	0.93522	1.60689	-1.2376	2.19831	-1.52546	-1.67249	-1.15078	2.90998	3.86085	-1.57285	1.43631	-1.4164	4.17144	-1.13091	-1.02947	3.59531	-1.66996	3.15579	2.99057	-0.792648	-1.55614	-0.862626	4.864	-1.50421	-0.0854286	3.56989	-0.895687	3.05152	-0.299681	2.46123	6.61624	1.52252	1.09566	1.83974	4.85218	-0.878027	-1.39765	-1.4982	-1.2248
hsa-miR-4721	1.15971	5.01809	3.33493	0.00123168	0.00335733	-2.01016	UP	5.18959	4.42279	6.18622	4.46426	5.14921	2.62262	0.862088	4.79463	3.07299	6.00333	-1.30103	4.02768	5.33271	3.47727	4.80118	4.35658	4.02351	5.56967	4.2933	3.20988	-1.35138	6.47399	5.70221	4.80118	5.54159	4.98533	4.93536	4.80516	7.09342	4.763	5.20132	5.21185	3.19436	6.20085	4.79222	4.763	4.96822	3.0674	5.1869	5.48179	5.43558	4.79703
hsa-miR-4722-3p	2.68232	2.90216	5.84943	7.49236e-08	4.69876e-07	7.33189	UP	3.16791	3.90121	3.86333	-1.57134	4.71637	4.65009	-1.55063	4.17942	3.76695	-1.74038	-1.30103	-1.11174	-1.57285	2.07667	5.1029	2.04778	3.78465	-1.02947	4.70207	-1.66996	-1.35138	3.65096	-0.792648	1.45107	-0.862626	-1.02774	-1.50421	2.3771	-1.48952	-0.895687	4.74888	-0.299681	5.2941	3.17011	3.06502	4.85024	4.60924	-1.5912	-0.878027	-1.39765	1.84742	-1.2248
hsa-miR-4723-3p	2.23363	4.01283	5.42236	4.72026e-07	2.615e-06	5.53519	UP	4.68812	4.46426	4.57736	4.65009	5.09192	-1.2376	-1.55063	-1.52546	4.20836	4.78213	-1.30103	-1.11174	1.62809	-0.626505	3.97343	4.98921	-1.13091	-1.02947	1.82436	6.20085	4.2996	4.02351	-0.792648	5.11943	5.4611	-1.02774	4.36532	4.19498	-1.48952	-0.895687	5.27075	5.96637	5.33051	3.79115	5.39167	5.18959	3.92504	2.58203	-0.878027	1.86221	3.36188	5.0237
hsa-miR-4724-3p	-1.98962	0.987488	-4.46602	2.26254e-05	9.05368e-05	1.78671	DOWN	3.75333	1.06078	0.695846	4.15732	-1.67742	-1.2376	-1.55063	2.86084	2.72225	2.95053	4.11515	-1.11174	2.32246	5.53677	3.99804	4.36103	-1.13091	-1.02947	1.32151	3.94355	-1.35138	5.31315	-0.792648	3.51548	-0.862626	-1.02774	3.69567	4.15513	5.24823	3.50184	3.69363	-0.299681	5.3505	1.69945	2.03784	4.18721	2.69412	-1.5912	-0.878027	4.3036	3.41834	4.87703
hsa-miR-4726-3p	1.09527	3.77468	2.86248	0.00520552	0.0118581	-3.34271	UP	5.03182	5.7392	0.44544	0.871286	5.93768	-1.2376	2.31609	2.5642	4.15952	1.90942	2.52165	4.63338	1.26198	0.117044	-1.4164	4.81153	3.07299	3.97823	4.86852	3.8011	2.20943	5.44056	5.0237	6.12799	4.44701	6.91016	1.32151	3.22432	-1.48952	3.17466	3.73177	-0.299681	5.56173	5.28078	4.38655	4.02768	4.09043	2.34807	-0.878027	-1.39765	2.0843	4.80516
hsa-miR-4727-3p	-2.77378	5.13904	-10.0063	2.23906e-16	4.9087e-15	26.71	DOWN	6.04465	6.02871	7.02912	6.45619	5.95946	6.83223	7.05858	6.4928	7.31996	5.95946	5.91648	-1.11174	6.09126	6.61624	6.46538	6.48286	5.61023	6.59696	7.20242	5.1566	5.59536	7.05281	6.20973	6.0153	5.51713	7.64572	7.33187	6.32925	8.26824	6.67492	6.81018	6.67029	6.09126	7.65198	6.64488	6.79257	6.22513	6.37297	6.32162	6.86776	6.53024	6.51142
hsa-miR-4728-3p	1.29169	4.88914	5.08051	1.96605e-06	9.58728e-06	4.14779	UP	4.98533	5.42101	4.25675	4.47346	4.74147	2.51198	3.67823	4.24053	6.45174	4.42279	3.44482	5.6931	5.01102	4.53865	3.59977	1.70978	5.15179	5.26003	4.26321	3.35285	-1.35138	3.66092	5.59284	5.34389	5.85651	-1.02774	4.45684	4.55234	5.17397	5.30288	3.81605	-0.299681	5.49879	4.07065	4.66999	5.20735	5.2941	4.57484	3.27738	3.74453	4.62931	4.39821
hsa-miR-4730	2.94648	8.80794	20.0402	2.62323e-35	1.64222e-32	69.8718	UP	7.96117	8.19187	7.57286	6.53796	7.96987	6.87915	7.60037	7.41711	7.71505	8.0401	8.3153	9.64725	8.42824	8.49922	8.56758	7.71505	8.8637	8.46324	6.60634	6.94792	7.62741	6.40753	6.06427	7.43628	6.93345	6.80151	6.96888	7.38577	6.5462	6.88421	6.62673	6.71673	6.32925	7.40465	8.15984	7.70108	7.95247	7.33187	7.96117	7.18369	7.95247	7.44288
hsa-miR-4731-5p	1.00637	6.00916	5.17163	1.35e-06	6.78972e-06	4.51282	UP	5.64678	6.20973	5.84262	5.62874	5.79335	-1.2376	5.77132	6.08343	4.78769	6.24615	6.20973	6.14173	4.93738	5.80519	5.35727	6.02529	5.76473	4.07673	5.89963	5.67738	3.67823	5.33938	5.93112	6.41637	4.8988	3.78673	6.14173	5.5043	5.22174	6.32162	5.62874	6.04465	6.27005	5.49271	6.17856	6.67492	5.82398	4.48696	5.12796	5.79908	5.76802	6.09126
hsa-miR-4732-3p	3.2851	1.63254	9.52069	2.34854e-15	4.33382e-14	24.3796	UP	-0.586066	3.99593	2.33874	-1.57134	-1.67742	-1.2376	-1.55063	2.42502	-1.67249	0.248527	2.13326	-1.11174	-1.57285	0.410286	-1.4164	-1.62845	-1.13091	-1.02947	4.56165	1.2387	-1.35138	-1.04535	-0.792648	-1.55614	-0.862626	-1.02774	2.49177	-0.326934	2.15948	-0.895687	-1.59003	-0.299681	-1.64229	2.40107	4.44496	-1.68781	-1.47576	2.05687	-0.878027	2.44946	-1.4982	2.99526
hsa-miR-4732-5p	-2.38198	6.25288	-13.2422	5.06492e-23	3.24788e-21	41.8943	DOWN	6.86776	7.44288	6.11156	7.89342	7.75451	7.99157	6.58638	8.1753	7.92502	6.86066	6.35311	5.67074	7.05858	6.29226	8.8637	7.54841	6.22513	5.63388	7.28287	7.34266	8.22365	5.79335	6.53796	6.36559	7.53713	7.37975	9.14214	9.1904	7.36533	5.38104	7.7263	6.25937	6.57651	8.30041	8.22365	6.73938	8.93752	7.95247	7.23188	8.34714	8.79879	7.54841
hsa-miR-4733-3p	1.54927	3.12006	3.68693	0.000383789	0.00118036	-0.91456	UP	0.901588	1.95998	2.87253	-1.57134	2.38996	6.46538	4.17144	3.38511	0.485505	4.28789	2.38257	4.78048	-1.57285	2.5642	4.37156	1.56342	4.33711	4.78048	3.04634	3.83486	-1.35138	-1.04535	-0.792648	4.15327	-0.862626	5.83114	4.15952	-0.19472	4.51246	-0.895687	4.6246	-0.299681	3.25412	3.60184	4.5506	4.57736	2.59614	5.00664	-0.878027	4.52151	2.88748	-1.2248
hsa-miR-4740-3p	1.95249	4.11894	5.43351	4.50234e-07	2.49968e-06	5.58124	UP	5.53677	2.99526	4.32516	3.69088	5.08698	-1.2376	3.22136	2.70235	6.0373	5.88175	4.40106	5.4454	4.86852	2.08704	4.38178	0.235571	4.04715	4.62058	4.83376	-0.535758	5.05182	-1.04535	3.5252	3.38511	3.72769	4.51246	3.65654	2.93238	2.20291	-0.895687	-1.59003	5.69012	5.47425	3.85204	4.39029	4.14305	4.06097	-1.5912	-0.878027	1.96738	4.0885	2.90536
hsa-miR-4740-5p	-2.91206	5.13054	-12.7963	3.94455e-22	2.15272e-20	39.8576	DOWN	5.77132	5.60716	6.3076	5.81844	5.2731	9.09969	6.23286	6.35714	6.59696	7.22535	7.06499	5.03863	5.48179	6.39796	5.38104	6.60634	5.70793	7.8257	6.41637	6.13509	6.28467	8.25386	6.73938	6.32925	5.49271	6.00901	6.87915	7.98524	7.18981	5.55147	5.40663	7.35304	5.95613	7.25596	5.48835	5.28078	7.24421	6.34908	9.40156	6.10435	7.21278	6.28467
hsa-miR-4742-3p	-2.02685	0.4909	-4.33561	3.7156e-05	0.000141823	1.31017	DOWN	-0.46094	4.34136	-1.58516	1.15088	1.95035	4.51246	3.69363	4.54232	3.26026	-0.188736	-1.30103	-1.11174	-1.57285	-0.681077	4.56421	-1.62845	-1.13091	3.9372	1.58724	0.175527	-1.35138	4.30914	-0.792648	-1.55614	4.01081	4.96005	1.02971	4.80118	-1.48952	3.39207	-1.59003	-0.299681	1.36116	-1.40019	-0.658176	2.92265	2.11035	3.30357	5.3624	1.82996	1.18008	4.23631
hsa-miR-4744	-1.08231	-0.103561	-2.72878	0.00761711	0.0164322	-3.68921	DOWN	-0.98256	-1.61738	1.41143	1.43631	-1.67742	-1.2376	3.23526	1.79145	3.51548	0.812615	-1.30103	-1.11174	-1.57285	-1.64433	-1.4164	2.77787	-1.13091	-1.02947	1.32151	1.11385	3.07299	-1.04535	-0.792648	-1.55614	3.75968	-1.02774	2.20617	2.20943	4.79703	-0.895687	2.88124	-0.299681	-1.64229	-1.40019	1.77612	-1.68781	3.27386	-1.5912	-0.878027	3.58552	-1.4982	-1.2248
hsa-miR-4748	3.88406	2.1741	10.461	2.49354e-17	6.14994e-16	28.8873	UP	0.704467	-1.61738	-1.58516	-1.57134	3.37599	-1.2376	-1.55063	-1.52546	1.64879	0.390121	-1.30103	-1.11174	-1.57285	-1.64433	3.20988	1.05151	-1.13091	4.053	1.45107	5.87464	-1.35138	3.58552	-0.792648	2.62051	4.43565	-1.02774	-1.50421	1.22046	-1.48952	-0.895687	0.972352	-0.299681	-1.64229	2.37869	-0.383352	1.21649	-1.47576	2.68052	-0.878027	-1.39765	1.43809	2.54823
hsa-miR-4753-5p	-1.50828	1.43786	-3.26552	0.00153612	0.00409152	-2.21614	DOWN	4.16545	1.80034	2.58203	5.79335	3.84502	-1.2376	3.7888	2.69412	-1.67249	2.03552	4.97241	3.71705	3.43568	-1.64433	5.2304	3.2562	3.04167	4.46662	3.35285	-1.66996	3.13454	-1.04535	-0.792648	-1.55614	-0.862626	-1.02774	4.38178	3.42045	4.83758	5.60142	-1.59003	-0.299681	2.3724	-1.40019	2.98621	3.27386	4.32125	4.40106	3.52029	4.9768	-1.4982	-1.2248
hsa-miR-4754	-1.16235	2.17746	-2.37207	0.0197741	0.0374874	-4.54363	DOWN	4.47346	4.20646	-1.58516	4.15732	2.49177	4.42716	5.77757	3.15233	-1.04089	4.83567	3.23241	-1.11174	3.60755	5.64678	4.81346	5.00664	-1.13091	-1.02947	5.42101	0.958802	2.89996	5.28925	4.09587	-1.55614	-0.862626	5.5196	4.9814	4.04715	4.52151	-0.895687	3.80714	-0.299681	3.72325	-1.40019	3.96854	3.65375	4.763	6.18622	-0.878027	4.80118	4.09587	-1.2248
hsa-miR-4755-3p	-4.23327	3.54678	-8.79971	7.70692e-14	1.22026e-12	20.9208	DOWN	5.84947	5.65827	3.61462	1.93035	3.82847	7.65198	7.1661	5.22174	4.77362	6.37297	6.22513	4.23631	4.93738	4.80959	-1.4164	2.47834	-1.13091	4.82981	5.40174	0.758319	5.13671	10.4861	6.41637	5.18959	7.08269	5.20349	6.38135	7.73287	5.76473	4.37741	5.80519	5.62254	1.25466	7.34266	4.99331	6.27005	7.1314	6.32162	5.38632	5.89963	4.91949	6.29646
hsa-miR-4757-5p	-3.32674	2.5354	-8.15126	1.75419e-12	2.19488e-11	17.8284	DOWN	4.53661	1.96377	3.19669	4.90246	0.250549	5.89703	5.4611	5.30546	5.43067	2.30638	2.80429	5.20132	4.17144	4.23237	5.23505	3.93314	4.72855	4.22623	5.55147	1.4187	5.60142	7.66471	-0.792648	3.55074	5.79335	4.90246	4.9977	5.0237	6.79257	4.40606	2.36484	-0.299681	1.79342	5.34827	1.59166	0.0632637	4.50727	5.50931	5.40174	5.09605	4.44907	4.74147
hsa-miR-4758-3p	1.03411	5.30416	4.35864	3.40603e-05	0.000131971	1.39366	UP	5.60142	5.80519	5.25267	5.13188	5.61821	4.72855	4.90246	3.65096	4.51676	3.9477	5.54723	5.66429	5.53677	4.60699	5.11037	4.58526	5.89703	4.74147	5.60716	1.16557	-1.35138	4.9977	5.88175	5.22793	-0.862626	3.08538	5.59032	5.26909	4.1973	5.72797	6.03301	5.39167	5.03182	5.2941	6.11895	5.47125	5.23948	4.18721	5.20735	4.52853	5.96966	5.58468
hsa-miR-4767	1.6333	4.11394	4.3123	4.05648e-05	0.000153691	1.22597	UP	5.06179	5.4611	3.83486	-1.57134	5.29646	-1.2376	1.68531	5.15436	4.84196	5.34164	4.73716	5.25724	2.09523	2.58203	3.90575	0.80367	-1.13091	5.48835	4.15952	0.514275	-1.35138	4.43089	4.69587	5.70221	3.84709	-1.02774	1.3909	4.6246	-1.48952	5.85651	4.27927	5.06815	2.98621	4.9768	4.50135	4.00323	4.94344	2.17582	-0.878027	4.55658	5.47125	2.69224
hsa-miR-4769-3p	1.53902	4.43483	4.41446	2.75551e-05	0.000108904	1.59721	UP	4.25675	4.95574	4.62259	5.23505	5.24823	-1.2376	-1.55063	2.72643	3.96285	5.15436	-1.30103	4.44496	4.52388	4.74888	3.77588	4.90063	5.15179	5.28542	4.8479	4.40821	5.63388	5.3172	5.25724	4.91949	5.14538	-1.02774	2.74629	4.52151	5.56173	-0.895687	4.61673	-0.299681	5.7392	4.74147	4.78048	5.00664	4.52388	1.11019	-0.878027	4.98533	5.21921	4.08657
hsa-miR-4770	-1.29482	-0.384234	-3.53644	0.000637672	0.00185235	-1.39319	DOWN	4.1756	-1.61738	1.2728	-1.57134	-1.67742	4.26919	-1.55063	2.33126	3.98303	-1.74038	-1.30103	3.49018	-1.57285	3.94355	-1.4164	0.655588	-1.13091	-1.02947	1.46197	0.790385	-1.35138	-1.04535	-0.792648	1.05151	-0.862626	3.57491	1.37555	-1.64695	4.98533	-0.895687	-1.59003	-0.299681	-1.64229	-1.40019	3.62069	-0.882703	1.75995	4.53865	-0.878027	2.13503	-1.4982	-1.2248
hsa-miR-4771	-4.47841	4.10496	-12.4455	2.01272e-21	9.05722e-20	38.2403	DOWN	6.96888	5.28542	6.5203	6.5203	5.25724	5.96637	8.20935	6.00901	5.66429	8.38262	7.18981	6.0153	5.046	6.31806	6.94792	5.69012	5.37146	5.39673	6.73938	6.11895	8.01125	7.65198	6.12799	5.74787	6.76149	5.43067	5.80519	7.09342	7.08269	6.7117	6.37297	-0.299681	4.94763	6.09126	5.7392	6.15647	6.17856	7.8257	4.66341	5.75434	5.76802	6.60634
hsa-miR-4774-5p	-1.04263	-0.49475	-2.85989	0.0052446	0.0119365	-3.34954	DOWN	3.01742	-1.61738	-1.58516	1.61143	-1.67742	-1.2376	3.75333	-1.52546	-0.576214	-1.47916	-1.30103	2.64216	1.2086	-1.64433	-1.4164	-1.62845	-1.13091	-1.02947	3.68047	2.75584	-1.35138	-1.04535	-0.792648	-1.55614	-0.862626	-1.02774	4.60699	4.19962	3.61108	-0.895687	2.58603	-0.299681	-1.64229	2.76234	-1.72575	-1.68781	-1.47576	4.47346	-0.878027	-1.39765	-1.4982	-1.2248
hsa-miR-4776-3p	1.02034	0.855666	2.50163	0.0141317	0.0282965	-4.24532	UP	2.25037	2.02826	3.66092	2.50442	1.01007	-1.2376	2.56656	-1.52546	-1.67249	0.629011	5.20349	-1.11174	2.20291	4.39821	-1.4164	-1.62845	-1.13091	-1.02947	0.467604	5.28542	3.54051	3.47727	-0.792648	-1.55614	-0.862626	-1.02774	-1.50421	0.995791	1.67667	-0.895687	0.895473	-0.299681	1.96558	-1.40019	1.91809	0.240846	2.38257	-1.5912	-0.878027	-1.39765	-1.4982	-1.2248
hsa-miR-4776-5p	-1.67151	4.12178	-5.41538	4.86194e-07	2.68769e-06	5.50638	DOWN	5.17936	4.92644	5.34827	5.82398	5.16924	4.95574	5.79335	4.27735	3.06265	5.78281	5.69914	4.51246	5.53091	5.25724	5.28542	6.13509	4.39821	3.95934	6.10435	3.71041	4.72275	-1.04535	3.77166	4.54649	3.83907	5.82398	6.07618	5.1842	6.0524	5.28078	5.07468	-0.299681	2.53707	5.18178	5.76473	6.09126	5.58468	6.29226	5.53091	5.51466	5.30804	5.45105
hsa-miR-4777-3p	-2.13407	0.204587	-5.0634	2.10906e-06	1.01306e-05	4.07965	DOWN	3.93931	1.60336	2.86084	-1.57134	2.01438	3.34549	2.95704	-1.52546	-0.010956	-1.74038	-1.30103	-1.11174	-1.57285	-0.303291	3.38938	-1.62845	4.00015	-1.02947	3.42758	0.823099	2.32649	-1.04535	-0.792648	5.04347	-0.862626	-1.02774	5.48507	4.33711	5.68357	-0.895687	3.29504	-0.299681	-1.64229	1.72682	4.28593	2.23929	3.43766	4.86852	-0.878027	4.7208	-1.4982	-1.2248
hsa-miR-4779	-1.23984	-0.580785	-3.65131	0.000433326	0.00131071	-1.0292	DOWN	2.3339	-1.61738	-1.58516	1.58936	-0.841418	-1.2376	-1.55063	-1.52546	1.21649	4.09587	-1.30103	-1.11174	-1.57285	4.4536	-1.4164	-1.62845	-1.13091	-1.02947	2.33874	-1.66996	5.53677	-1.04535	-0.792648	-1.55614	-0.862626	-1.02774	4.10071	-1.64695	2.1637	-0.895687	-1.59003	-0.299681	-1.64229	2.29001	0.166154	-1.68781	1.65575	-1.5912	3.29504	2.56184	-1.4982	-1.2248
hsa-miR-4780	2.43264	1.26027	6.06858	2.84988e-08	1.95453e-07	8.27802	UP	-1.65612	2.88124	-1.58516	1.60336	1.54078	-1.2376	-1.55063	3.9372	-1.67249	2.56656	-1.30103	-1.11174	-1.57285	4.5506	-1.4164	3.91095	-1.13091	-1.02947	0.240846	7.41711	-1.35138	-1.04535	3.79351	4.81749	-0.862626	-1.02774	-1.50421	-0.554659	-1.48952	-0.895687	-1.59003	-0.299681	-1.64229	1.70978	2.58603	2.10309	-1.47576	-1.5912	-0.878027	-1.39765	-1.4982	-1.2248
hsa-miR-4783-3p	-1.28501	6.66167	-4.37009	3.26154e-05	0.000126755	1.43527	DOWN	7.42968	8.28464	4.49475	7.05858	8.36458	7.25001	5.32384	6.89434	5.58175	5.36714	5.47125	5.12412	6.83223	4.5506	7.61325	6.94792	5.72797	6.2422	6.84495	8.34714	6.87915	7.05281	7.93191	8.06824	7.61325	7.1314	4.5679	7.38577	8.11321	-0.895687	7.93879	8.72074	7.73944	8.72074	8.70052	8.68331	9.1904	9.00771	4.36103	9.03273	8.25386	8.79879
hsa-miR-4783-5p	-1.05877	5.54896	-4.34711	3.55777e-05	0.00013681	1.35182	DOWN	5.47952	5.77757	5.19915	5.355	4.46662	6.43439	6.35311	6.0524	5.56428	5.09192	6.33999	5.80779	4.9977	3.27034	6.62673	5.89443	5.10547	7.18981	6.13509	3.4337	6.30065	7.54841	6.15278	5.68357	5.95946	8.88636	6.46538	6.91016	8.72074	5.3172	1.74523	6.73938	6.73938	7.85963	5.1029	4.9221	6.58145	6.7822	5.4162	4.87703	5.88175	5.15884
hsa-miR-4785	1.30917	1.2072	2.83934	0.00556489	0.0125873	-3.40367	UP	2.79957	3.40886	3.99358	-1.57134	1.78449	-1.2376	-1.55063	4.76525	0.668484	1.2017	-1.30103	-1.11174	-1.57285	2.72434	2.84316	-1.62845	-1.13091	3.99358	-1.68431	-1.66996	-1.35138	3.01535	4.53081	-1.55614	-0.862626	-1.02774	-1.50421	0.785505	-1.48952	-0.895687	2.63524	-0.299681	4.38178	1.89469	-1.72575	2.09311	-1.47576	3.34831	-0.878027	-1.39765	1.66545	-1.2248
hsa-miR-4786-5p	-1.10526	1.87406	-2.57251	0.011699	0.0239242	-4.07627	DOWN	4.13693	3.47445	1.92169	1.87164	3.46258	3.24132	1.83481	1.59796	0.93522	1.7072	-1.30103	5.20132	2.38257	0.0018022	3.53229	-1.62845	3.71875	3.9181	3.9477	0.548648	2.69412	3.08538	-0.792648	4.68812	-0.862626	4.73716	4.32888	5.3693	1.2387	-0.895687	4.01081	-0.299681	-1.64229	2.11035	3.31723	4.67413	6.39796	5.85948	3.81834	3.96456	2.85856	-1.2248
hsa-miR-4787-3p	-1.66706	6.67867	-12.7383	5.16144e-22	2.75815e-20	39.5908	DOWN	8.3153	8.20935	7.58608	7.3918	7.92502	7.63946	7.33187	7.65198	8.12968	7.53713	7.96987	8.12968	7.43628	7.19612	7.66471	7.76955	7.68901	8.84558	7.01815	7.53713	7.76955	8.0401	7.03478	7.57286	7.51982	7.44288	6.13509	7.50175	6.35714	7.62741	8.22365	7.81202	6.84495	6.95922	6.79257	6.86776	7.18981	7.25001	7.54841	6.50682	7.7263	6.29646
hsa-miR-4789-3p	-1.09742	-0.862672	-3.98514	0.000134986	0.000462269	0.076794	DOWN	-1.18332	-1.61738	0.49133	-1.57134	0.134835	-1.2376	0.790385	-1.52546	-1.67249	3.66092	-1.30103	-1.11174	-1.57285	0.823099	-1.4164	1.57087	-1.13091	-1.02947	3.47162	-0.279	2.90536	5.24184	-0.792648	-1.55614	-0.862626	-1.02774	3.07299	-1.64695	-1.48952	-0.895687	0.704467	-0.299681	-1.64229	1.93727	0.660698	2.8786	-1.47576	-1.5912	-0.878027	-1.39765	-1.4982	-1.2248
hsa-miR-4789-5p	-3.16535	2.02736	-6.20968	1.51849e-08	1.07004e-07	8.89504	DOWN	4.33098	-1.61738	-1.58516	3.43766	2.50951	2.19831	5.39923	4.61865	5.81844	5.15884	2.30168	-1.11174	-1.57285	4.81346	4.42903	4.48074	-1.13091	-1.02947	2.01634	1.33897	4.1756	6.26471	-0.792648	2.90266	-0.862626	-1.02774	5.17397	-1.64695	4.864	4.51461	6.7822	4.93941	4.27324	3.8011	2.00758	6.02871	3.96456	5.38632	5.65225	6.14909	4.60247	6.08343
hsa-miR-4792	1.6607	5.67068	5.07598	2.00297e-06	9.67535e-06	4.12973	UP	6.35714	6.05657	2.06435	4.46007	6.65519	5.05674	-1.55063	5.92464	6.33999	5.49271	6.17014	6.77241	4.26321	0.467604	5.56173	5.67074	5.95279	6.83223	4.98533	2.80429	6.0798	6.69642	7.21278	6.35714	6.36559	5.26281	-1.50421	5.92056	3.96854	5.09819	6.36559	-0.299681	5.49271	4.50348	5.18959	5.57251	5.36477	4.26533	4.98533	3.10451	6.37297	2.5269
hsa-miR-4793-3p	2.93357	1.4967	7.24101	1.32644e-10	1.32754e-09	13.5571	UP	-0.0590659	-1.61738	-1.58516	3.59531	1.95609	-1.2376	2.50951	-1.52546	3.16182	0.726429	4.2812	-1.11174	4.1171	1.48091	-1.4164	4.96005	2.64662	-1.02947	-1.68431	-1.66996	-1.35138	-1.04535	-0.792648	2.17086	-0.862626	-1.02774	-1.50421	3.07716	-1.48952	-0.895687	-1.59003	-0.299681	3.30875	2.27046	-1.72575	-0.310407	-1.47576	-1.5912	-0.878027	-1.39765	-1.4982	-1.2248
hsa-miR-4795-3p	-1.81168	0.888081	-3.37808	0.00107202	0.00297589	-1.88042	DOWN	2.70529	-1.61738	2.05274	0.538093	1.00652	-1.2376	-1.55063	-1.52546	2.47133	3.57491	-1.30103	-1.11174	1.18008	0.655588	-1.4164	3.9181	4.69426	5.30804	3.10677	5.73312	-1.35138	4.62931	3.57491	3.30875	-0.862626	10.6306	-1.50421	5.63388	10.2552	4.08657	-1.59003	-0.299681	0.56533	2.30168	2.05964	3.57742	2.93965	-1.5912	-0.878027	-1.39765	1.59596	3.95755
hsa-miR-4797-3p	-1.06842	0.08957	-2.3985	0.0184827	0.0355585	-4.48392	DOWN	-1.74038	3.39475	1.79145	-1.57134	0.458791	-1.2376	0.71633	-1.52546	0.899604	1.96738	5.64011	3.94143	-1.57285	4.69985	-1.4164	-1.62845	-1.13091	-1.02947	-1.68431	-1.66996	-1.35138	5.4264	3.74856	-1.55614	-0.862626	4.60699	-1.50421	3.56602	3.71535	-0.895687	4.64236	-0.299681	-1.64229	-1.40019	-1.50527	2.61026	-1.47576	3.82482	-0.878027	5.06179	-1.4982	-1.2248
hsa-miR-4797-5p	-1.05526	0.0712474	-2.3587	0.0204574	0.0384286	-4.57362	DOWN	0.93522	-1.61738	-1.58516	-1.57134	1.48706	2.67757	-1.55063	-1.52546	3.08746	-0.508407	-1.30103	4.1634	4.83977	-0.251341	-1.4164	0.992874	2.69035	3.38007	-1.68431	2.91423	3.99123	4.26321	4.23025	-1.55614	5.07692	-1.02774	-1.50421	-1.64695	-1.48952	-0.895687	-1.59003	-0.299681	-1.64229	-1.40019	-1.1291	-1.20904	-1.47576	-1.5912	-0.878027	-1.39765	4.87295	2.95053
hsa-miR-4804-3p	2.91589	1.10943	7.72961	1.31642e-11	1.48097e-10	15.8367	UP	0.610495	-1.61738	3.85398	-1.57134	2.89996	-1.2376	-1.55063	-1.52546	-0.87667	3.2562	-1.30103	-1.11174	-1.57285	-1.64433	-1.4164	-1.62845	-1.13091	-1.02947	-1.68431	2.61026	-1.35138	4.25675	4.57232	1.72868	-0.862626	-1.02774	-1.50421	-0.652044	-1.48952	-0.895687	-1.59003	-0.299681	5.36714	-1.40019	0.818363	-1.68781	-1.47576	-1.5912	-0.878027	-1.39765	-1.4982	2.49751
hsa-miR-4804-5p	-1.31117	-0.28022	-3.11517	0.00245244	0.00617927	-2.65046	DOWN	-1.38229	0.761319	-1.58516	2.54218	2.62788	5.75103	-1.55063	4.85024	1.92169	5.5043	4.31302	3.3567	-1.57285	-1.64433	-1.4164	2.98621	-1.13091	-1.02947	-1.68431	-1.66996	5.79908	-1.04535	-0.792648	-1.55614	-0.862626	-1.02774	-1.50421	-0.641681	-1.48952	-0.895687	4.16545	-0.299681	1.72	4.01956	-1.72575	1.39509	3.80303	-1.5912	-0.878027	-1.39765	-1.4982	-1.2248
hsa-miR-485-3p	2.39198	2.10003	5.90294	5.92486e-08	3.79932e-07	7.5615	UP	0.685132	3.32137	-1.58516	4.37741	-1.67742	4.3036	2.61616	-1.52546	3.11287	3.48763	-1.30103	-1.11174	-1.57285	3.58552	-1.4164	2.26749	-1.13091	-1.02947	4.19143	4.07912	-1.35138	-1.04535	3.55618	-1.55614	4.21816	-1.02774	-1.50421	2.32436	-1.48952	-0.895687	3.77166	-0.299681	3.83049	-1.40019	4.1634	2.94735	-1.47576	0.621857	-0.878027	2.76234	3.17011	3.17011
hsa-miR-487a-5p	1.30848	1.74333	2.79882	0.00624958	0.0139151	-3.50943	UP	3.13998	0.384198	-1.58516	-1.57134	-1.02774	-1.2376	4.18721	-1.52546	-0.634209	-1.37332	-1.30103	-1.11174	-1.57285	2.13503	-1.4164	2.30638	-1.13091	-1.02947	0.750126	0.842956	1.91363	-1.04535	-0.792648	3.43766	-0.862626	5.40663	3.28046	3.78673	-1.48952	-0.895687	5.88175	-0.299681	4.26109	4.15513	2.8933	0.413791	-1.47576	5.58468	4.22813	5.18959	2.36706	-1.2248
hsa-miR-487b-5p	2.32884	2.35297	5.55414	2.69242e-07	1.57672e-06	6.08249	UP	0.595016	3.95368	-1.58516	3.40677	0.668484	-1.2376	-1.55063	-1.52546	4.07434	4.88556	-1.30103	-1.11174	3.42256	4.1047	-1.4164	2.64662	-1.13091	-1.02947	-0.908714	5.40663	-1.35138	5.45105	3.56989	2.48315	4.3432	-1.02774	1.27559	2.63763	4.48286	5.33051	-1.59003	-0.299681	5.2442	2.10562	-1.18332	0.302066	-1.47576	-1.5912	-0.878027	-1.39765	4.18352	3.75095
hsa-miR-490-3p	-1.12853	1.04949	-2.4243	0.0172948	0.0335277	-4.42506	DOWN	-1.60716	4.10651	-1.58516	-1.57134	3.56125	5.4611	5.02788	4.1047	1.46698	1.17199	-1.30103	2.98839	3.37069	4.37348	-1.4164	0.395945	-1.13091	-1.02947	1.75577	-1.66996	-1.35138	-1.04535	-0.792648	-1.55614	-0.862626	-1.02774	-1.50421	1.80609	1.48091	3.13725	2.02422	5.01963	3.01327	3.3259	-1.51959	4.4931	3.52753	4.43089	4.92644	3.43766	1.58724	4.95114
hsa-miR-493-3p	1.48957	0.0358304	4.3414	3.63534e-05	0.000138966	1.33112	UP	1.67015	-1.61738	-1.58516	-1.57134	-1.1868	-1.2376	-1.55063	-1.52546	-1.67249	1.06078	-1.30103	-1.11174	-1.57285	0.187637	-1.4164	-1.62845	-1.13091	-1.02947	1.54078	3.73622	-1.35138	-1.04535	-0.792648	-1.55614	-0.862626	-1.02774	1.99003	-1.64695	2.01634	-0.895687	1.24444	-0.299681	-1.64229	-1.40019	1.57087	-1.68781	-1.47576	-1.5912	3.18799	-1.39765	-1.4982	-1.2248
hsa-miR-493-5p	-1.1951	-0.0229151	-2.96956	0.00380386	0.00903416	-3.05524	DOWN	2.9121	1.55254	3.34831	2.43823	2.49177	-1.2376	2.75	-1.52546	-0.935352	2.36484	-1.30103	4.07065	3.3259	3.77377	-1.4164	-0.321258	-1.13091	-1.02947	0.989956	1.45715	5.43558	-1.04535	-0.792648	1.58197	-0.862626	-1.02774	-1.50421	-1.64695	-1.48952	-0.895687	-1.59003	-0.299681	2.96554	-1.40019	-0.471846	1.15434	2.39621	-1.5912	-0.878027	1.95609	5.07002	-1.2248
hsa-miR-494-3p	1.42067	3.66745	3.58021	0.000550911	0.00163741	-1.25555	UP	2.32863	3.71875	-1.58516	2.96554	3.30357	5.40174	5.06179	-1.52546	4.67824	1.33897	4.33309	4.97031	4.98533	5.0237	4.6246	4.91247	3.87047	4.57232	2.20617	-0.597835	-1.35138	4.79222	-0.792648	4.85024	-0.862626	5.4264	1.62809	4.40606	-1.48952	5.10547	0.732516	6.3076	3.98303	2.13904	2.59977	3.34549	3.24132	4.07434	-0.878027	4.41357	4.61673	3.13725
hsa-miR-496	-1.04421	0.284926	-2.31289	0.0229603	0.0426763	-4.67524	DOWN	-1.52971	-1.61738	-1.58516	-1.57134	-1.67742	3.01742	4.6141	1.68531	4.90246	3.31723	5.06815	3.80497	2.43436	-0.458165	-1.4164	4.42279	-1.13091	5.03631	2.07226	4.66785	-1.35138	-1.04535	-0.792648	-1.55614	-0.862626	-1.02774	4.12681	-1.64695	-1.48952	4.79222	3.35477	-0.299681	3.09469	-1.40019	1.35511	-1.68781	-1.47576	0.360077	-0.878027	-1.39765	-1.4982	2.79957
hsa-miR-499a-5p	-1.03239	-0.785393	-3.3882	0.00103749	0.00289888	-1.8498	DOWN	-1.74038	0.597286	-1.58516	-1.57134	2.41576	3.61829	-1.55063	-1.52546	-0.440538	-1.74038	2.72434	4.55234	-1.57285	-1.64433	-1.4164	2.34397	-1.13091	-1.02947	1.30877	-0.275659	-1.35138	4.13305	-0.792648	-1.55614	-0.862626	-1.02774	-1.50421	-0.331462	-1.48952	-0.895687	-1.59003	-0.299681	-1.64229	-1.40019	-1.38035	-1.68781	-1.47576	2.56184	-0.878027	3.56125	-1.4982	-1.2248
hsa-miR-499b-3p	-1.37785	0.366956	-3.03343	0.00314308	0.00768542	-2.87962	DOWN	0.141703	-1.61738	3.93314	4.28593	1.84452	-1.2376	3.96854	2.27422	2.11879	-1.74038	3.69088	-1.11174	-1.57285	3.94973	-1.4164	-1.62845	-1.13091	4.13895	-1.68431	-1.66996	-1.35138	-1.04535	-0.792648	3.3567	-0.862626	-1.02774	3.43766	2.67757	-1.48952	-0.895687	4.41357	-0.299681	1.24444	2.12038	3.77588	3.00653	-1.47576	3.74856	4.03693	-1.39765	-1.4982	4.15513
hsa-miR-5001-3p	1.05456	0.413071	2.73621	0.00745994	0.0161611	-3.67031	UP	2.08978	3.78005	-1.58516	-1.57134	-1.67742	-1.2376	-1.55063	-1.52546	3.52029	-0.844143	-1.30103	-1.11174	-1.57285	-1.64433	-1.4164	0.899604	3.60755	-1.02947	-1.68431	3.61829	-1.35138	-1.04535	-0.792648	2.22982	-0.862626	-1.02774	-1.50421	1.0882	-1.48952	-0.895687	1.95609	-0.299681	3.25412	-1.40019	2.47834	0.968879	1.76774	-1.5912	-0.878027	-1.39765	-1.4982	-1.2248
hsa-miR-5002-3p	2.85928	0.939258	7.49929	3.92673e-11	4.26782e-10	14.7577	UP	-0.762824	-1.61738	0.44544	-1.57134	-0.445286	-1.2376	-1.55063	-1.52546	-1.67249	2.11879	-1.30103	-1.11174	-1.57285	-1.64433	-1.4164	-1.62845	-1.13091	-1.02947	0.571407	2.8933	-1.35138	-1.04535	-0.792648	-1.55614	-0.862626	-1.02774	-1.50421	-0.0513407	-1.48952	3.8797	1.63493	4.73716	4.03008	-1.40019	-0.132143	-1.68781	-1.47576	-1.5912	-0.878027	-1.39765	-1.4982	-1.2248
hsa-miR-5008-3p	1.89253	1.27928	4.74873	7.50754e-06	3.28055e-05	2.85022	UP	0.173187	2.18005	1.84213	-1.57134	2.84613	-1.2376	2.0332	3.68271	2.15146	2.32436	-1.30103	-1.11174	1.40256	1.81212	-1.4164	-1.62845	-1.13091	-1.02947	2.70529	2.44188	3.40469	3.19902	-0.792648	-1.55614	-0.862626	-1.02774	-1.50421	-1.64695	1.58511	5.06179	-1.59003	-0.299681	-1.64229	-1.40019	1.91363	2.04778	2.74629	-1.5912	-0.878027	-1.39765	-1.4982	-1.2248
hsa-miR-500a-3p	-2.27388	0.938541	-5.45221	4.1588e-07	2.32911e-06	5.65858	DOWN	1.81212	3.66092	0.534703	2.05274	3.59754	-1.2376	-1.55063	3.32137	-1.67249	4.02768	2.40924	3.62726	4.38655	2.1637	4.34136	3.45734	2.61026	4.37545	3.33942	0.0998462	4.57736	3.50391	-0.792648	-1.55614	4.24223	4.28593	1.50826	-1.64695	4.59308	-0.895687	2.8661	-0.299681	0.240846	3.2562	3.83907	0.190429	3.12784	-1.5912	4.88949	4.15952	3.11287	3.60755
hsa-miR-5010-3p	3.21239	1.15186	9.08491	1.93882e-14	3.22927e-13	22.2877	UP	1.40558	-1.61738	-1.58516	-1.57134	0.541484	-1.2376	-1.55063	-1.52546	-0.905725	-0.269	2.17582	-1.11174	0.554286	0.214758	-1.4164	4.141	-1.13091	-1.02947	-0.30522	7.26191	-1.35138	3.04167	-0.792648	-1.55614	-0.862626	-1.02774	-1.50421	-1.64695	-1.48952	-0.895687	0.745538	-0.299681	-1.64229	1.90942	1.23001	-1.68781	-1.47576	-1.5912	-0.878027	-1.39765	4.53081	-1.2248
hsa-miR-502-5p	-1.86566	0.206777	-4.13689	7.78311e-05	0.000276889	0.602102	DOWN	-0.31878	2.06629	0.630736	2.51805	3.4337	3.41444	1.66168	-1.52546	-1.67249	-0.466538	-1.30103	-1.11174	0.785505	1.38067	-1.4164	2.21975	-1.13091	3.48024	1.97449	-1.66996	-1.35138	3.43766	-0.792648	-1.55614	-0.862626	11.1624	3.12209	-1.64695	3.81377	-0.895687	-1.59003	-0.299681	3.13454	-1.40019	0.0284396	-1.68781	-1.47576	0.503967	-0.878027	4.58526	1.49337	4.58526
hsa-miR-503-3p	2.41985	2.04728	6.17238	1.79442e-08	1.25414e-07	8.73134	UP	2.82491	3.21841	1.40256	2.44545	3.9372	-1.2376	-1.55063	-1.52546	2.31609	1.63758	-1.30103	3.41639	-1.57285	1.17603	4.30164	2.20943	3.15233	3.67007	-0.739791	4.7991	2.92925	-1.04535	-0.792648	-1.55614	-0.862626	3.83486	2.53962	1.00652	-1.48952	-0.895687	-1.59003	-0.299681	-0.160604	2.89996	3.8797	2.15442	4.20456	1.57569	-0.878027	-1.39765	-1.4982	-1.2248
hsa-miR-503-5p	-1.39536	0.254982	-3.29317	0.00140723	0.00377567	-2.13449	DOWN	-0.173901	0.0724396	3.25823	4.16751	0.833198	4.15952	3.57992	-1.52546	1.70463	-1.74038	-1.30103	-1.11174	2.99526	2.04532	-1.4164	1.9051	-1.13091	-1.02947	3.61829	0.0519286	-1.35138	5.15884	3.78005	-1.55614	-0.862626	-1.02774	4.33924	-1.64695	-1.48952	4.6141	2.54823	-0.299681	-1.64229	-1.40019	-1.39863	4.10831	2.74065	-1.5912	-0.878027	2.12198	1.35511	3.64677
hsa-miR-504-3p	1.13377	5.93876	5.45862	4.04707e-07	2.27647e-06	5.68512	UP	5.44056	5.45567	6.27005	5.98073	5.78769	5.43558	6.11895	5.49575	6.18622	5.55667	5.62254	5.27545	5.74196	5.21185	5.01521	5.80519	5.56173	6.28847	5.65225	4.9977	4.82623	6.45174	3.64886	5.33051	5.74787	5.57251	5.72466	5.70221	5.28925	6.12799	6.10435	5.59536	5.40891	5.78281	5.85651	6.37297	4.67213	2.7853	4.73716	5.80519	5.01102	6.15647
hsa-miR-504-5p	-1.38847	0.79639	-2.92614	0.00432388	0.0101101	-3.17286	DOWN	0.048956	2.00532	1.32151	3.7972	0.49133	4.21604	1.87667	2.54823	4.3351	4.15513	4.01286	-1.11174	5.08698	2.11879	1.86891	-1.62845	-1.13091	-1.02947	3.57742	4.64236	4.31302	-1.04535	4.68812	-1.55614	-0.862626	-1.02774	-1.50421	2.09311	-1.48952	-0.895687	-1.59003	-0.299681	3.54051	-1.40019	1.55254	-1.18563	1.49337	-1.5912	-0.878027	2.90536	3.05152	3.14779
hsa-miR-505-3p	-1.71397	-0.170557	-4.68548	9.6401e-06	4.10745e-05	2.60876	DOWN	2.34397	-1.61738	-1.58516	-1.57134	2.94416	-1.2376	2.21975	2.34602	3.93314	-1.51009	2.8661	-1.11174	4.5814	2.88436	1.66168	-1.62845	-1.13091	2.90767	0.977846	4.93536	3.30551	-1.04535	-0.792648	-1.55614	-0.862626	-1.02774	-1.50421	3.08335	-1.48952	-0.895687	-1.59003	-0.299681	3.86085	2.30638	3.05803	3.60573	1.59397	1.54513	4.10831	-1.39765	2.24268	-1.2248
hsa-miR-507	-1.24998	0.114074	-2.92118	0.00438736	0.0102398	-3.18622	DOWN	-1.24596	-1.61738	-1.58516	-1.57134	-1.67742	4.17942	-1.55063	-1.52546	-1.67249	-0.930714	-1.30103	-1.11174	-1.57285	2.45353	3.24132	2.09735	3.37599	-1.02947	-0.158253	4.18721	-1.35138	-1.04535	-0.792648	2.98621	-0.862626	3.69771	-1.50421	-1.64695	2.57453	4.36964	-1.59003	4.91247	4.18721	-1.40019	2.74629	-1.68781	-1.47576	1.35236	3.75333	1.75577	4.96822	4.44496
hsa-miR-508-5p	4.64393	1.82027	13.9451	2.08523e-24	1.78287e-22	45.0586	UP	3.90348	-1.61738	-1.58516	-1.57134	-1.67742	-1.2376	-1.55063	-1.52546	0.827879	-1.31189	-1.30103	-1.11174	-1.57285	-1.64433	-1.4164	-1.62845	-1.13091	-1.02947	-1.68431	3.61108	-1.35138	-1.04535	-0.792648	4.47863	-0.862626	-1.02774	1.30542	2.08978	2.19831	-0.895687	-1.59003	-0.299681	2.13503	-1.40019	0.578011	-1.68781	-1.47576	1.60689	3.37069	-1.39765	1.98257	-1.2248
hsa-miR-5087	1.22756	-0.682945	3.32278	0.00128051	0.00346833	-2.04646	UP	-1.65102	-1.61738	3.75529	-1.57134	-1.67742	-1.2376	-1.55063	-1.52546	-0.76544	-1.74038	-1.30103	-1.11174	-1.57285	-1.64433	-1.4164	-1.62845	-1.13091	-1.02947	-1.68431	-1.66996	-1.35138	-1.04535	-0.792648	-1.55614	-0.862626	-1.02774	-1.50421	-1.64695	-1.48952	-0.895687	-1.59003	-0.299681	-1.64229	-1.40019	-1.72575	-1.68781	-1.47576	-1.5912	-0.878027	-1.39765	-1.4982	-1.2248
hsa-miR-5088-3p	1.33057	3.08826	3.10317	0.00254414	0.00637901	-2.68442	UP	3.53471	4.15952	3.30551	5.00178	1.8224	-1.2376	-1.55063	-1.52546	-1.67249	4.48696	2.31082	4.82623	3.85591	3.67391	-1.4164	4.67213	3.94568	-1.02947	4.07065	5.5068	7.45669	-1.04535	5.62874	4.7713	4.53081	-1.02774	2.06629	4.67612	1.90726	7.05858	3.64467	4.88556	4.13491	-1.40019	3.90835	1.59796	4.71235	3.93931	-0.878027	3.65375	1.73879	-1.2248
hsa-miR-5088-5p	2.77716	3.14939	6.55799	3.14111e-09	2.52568e-08	10.4419	UP	3.27738	4.00668	1.11385	2.27919	3.99593	-1.2376	-1.55063	-1.52546	1.06078	3.98714	-1.30103	-1.11174	2.11879	3.10451	-1.4164	-1.62845	-1.13091	4.30914	2.3882	7.3918	3.03221	-1.04535	4.68036	4.22433	-0.862626	-1.02774	2.90266	3.19902	2.09735	6.85357	2.93965	-0.299681	-0.427714	-1.40019	3.62069	4.0885	-1.47576	2.51445	-0.878027	1.88126	5.86246	-1.2248
hsa-miR-509-3p	-1.14229	0.325234	-2.69601	0.00834611	0.0178696	-3.77199	DOWN	-0.683764	0.117044	-1.58516	3.91095	3.21841	-1.2376	3.94143	1.90284	3.83486	-1.74038	3.08538	-1.11174	-1.57285	2.55162	-1.4164	-1.62845	-1.13091	-1.02947	4.39821	1.65871	4.2933	-1.04535	-0.792648	-1.55614	-0.862626	4.50727	4.15327	-0.69233	3.59038	-0.895687	2.59977	-0.299681	-0.228451	2.34397	-0.597835	-1.68781	4.04895	4.77362	-0.878027	-1.39765	1.90057	-1.2248
hsa-miR-5090	1.59512	7.1471	11.9577	1.98096e-20	7.25881e-19	35.9709	UP	7.04703	7.83932	6.33999	6.72852	7.30541	5.37875	7.15402	6.32162	6.91016	5.48179	5.85299	6.59696	6.33999	4.72855	6.09126	6.21729	6.37297	5.73054	6.53024	5.19348	6.41637	6.32925	7.45669	7.61325	6.70667	5.96637	6.23753	5.61023	5.34389	5.12412	6.32925	6.2501	7.01285	7.30541	6.95922	6.60634	6.13509	6.87915	5.26743	6.29226	6.72852	6.33999
hsa-miR-5091	-1.2617	0.105805	-2.71768	0.00785734	0.0169078	-3.71735	DOWN	-0.35633	3.26786	1.86891	-1.57134	0.947363	3.97823	1.54892	-1.52546	2.25984	2.0183	4.70621	-1.11174	-1.57285	-1.64433	4.44907	3.85591	-1.13091	-1.02947	0.743418	-0.67044	-1.35138	-1.04535	-0.792648	-1.55614	-0.862626	4.19498	4.13693	1.525	-1.48952	-0.895687	-1.59003	-0.299681	-1.64229	-1.40019	4.03866	4.44496	2.61393	3.19902	-0.878027	3.90121	-1.4982	-1.2248
hsa-miR-5092	-2.27023	0.566495	-5.07368	2.022e-06	9.74893e-06	4.12056	DOWN	0.0898956	3.78465	-1.58516	0.560143	-1.67742	5.4162	5.3106	2.88748	0.701912	-1.74038	5.14043	4.09829	0.695846	-1.64433	-1.4164	-1.62845	-1.13091	4.22029	4.19143	-1.66996	2.15442	-1.04535	-0.792648	2.03784	-0.862626	5.73312	4.07673	2.07447	3.00196	-0.895687	2.61026	-0.299681	4.25235	3.08132	-0.505033	3.58795	3.17011	3.39207	-0.878027	5.70793	-1.4982	4.46897
hsa-miR-5094	-1.01639	0.659636	-2.2445	0.0272003	0.0494113	-4.82364	DOWN	0.152022	-1.61738	2.91423	3.08953	-1.67742	3.89466	4.6141	-1.52546	2.13149	2.82168	-1.30103	-1.11174	-1.57285	2.42502	3.61462	-1.62845	-1.13091	2.98621	4.81153	-1.66996	4.98533	4.59748	-0.792648	4.39821	-0.862626	2.97371	3.78235	2.49464	-1.48952	-0.895687	1.99774	4.51246	3.69088	-1.40019	0.384198	-1.68781	2.37869	0.989956	4.26533	1.77833	-1.4982	-1.2248
hsa-miR-510-5p	-1.89266	0.250166	-4.51514	1.87294e-05	7.57743e-05	1.96854	DOWN	2.47623	3.77166	0.432736	-1.57134	-1.67742	5.75765	3.40469	3.21841	-1.67249	-0.513956	3.20988	-1.11174	2.3339	2.91423	4.353	-1.62845	-1.13091	3.76695	-0.292407	-0.310407	-1.35138	-1.04535	-0.792648	-1.55614	-0.862626	5.60429	3.69567	1.29599	3.10224	-0.895687	3.60573	-0.299681	-1.64229	1.80609	0.877253	-0.957868	4.10831	5.70793	-0.878027	3.85591	-1.4982	3.2562
hsa-miR-5100	-3.56267	12.3344	-19.8678	5.00873e-35	2.14123e-32	69.2352	DOWN	13.6352	12.8487	13.6352	14.9147	13.3402	14.9147	14.9147	14.9147	14.1023	13.4131	13.8037	12.055	13.6352	14.9147	14.1023	14.1023	13.5022	13.6352	14.9147	14.1023	13.8037	14.1023	13.6352	13.5022	13.5022	14.9147	14.9147	14.9147	14.9147	14.9147	14.1023	14.1023	13.3402	13.1133	13.6352	13.8037	13.5022	13.8037	14.9147	14.1023	14.1023	13.8037
hsa-miR-512-5p	1.80955	1.32836	4.10198	8.84379e-05	0.00031117	0.480058	UP	-0.484044	1.12945	0.977846	3.34831	2.41576	2.76234	-1.55063	3.78235	-1.67249	-1.13807	3.65375	-1.11174	2.02422	0.880984	-1.4164	-1.62845	-1.13091	-1.02947	-0.649956	4.89671	-1.35138	-1.04535	-0.792648	-1.55614	-0.862626	-1.02774	2.22982	2.22623	3.60573	8.68331	-1.59003	-0.299681	-1.64229	2.3882	-1.72575	-1.68781	1.72868	2.35653	-0.878027	2.53962	4.96005	-1.2248
hsa-miR-513c-5p	1.26528	-0.424098	3.63027	0.000465375	0.00139612	-1.09652	UP	-1.62777	-1.61738	-1.58516	-1.57134	-1.67742	-1.2376	-1.55063	4.41357	-1.67249	2.31832	-1.30103	-1.11174	-1.57285	-1.64433	-1.4164	-1.62845	-1.13091	-1.02947	-1.68431	0.167736	-1.35138	-1.04535	-0.792648	4.91949	-0.862626	-1.02774	-1.50421	-1.64695	-1.48952	-0.895687	0.797038	-0.299681	-1.64229	-1.40019	-1.72575	-1.68781	-1.47576	-1.5912	-0.878027	-1.39765	-1.4982	-1.2248
hsa-miR-514a-3p	-1.43573	-0.468841	-3.85401	0.000215048	0.000694707	-0.365983	DOWN	2.28754	-1.61738	3.10025	-1.57134	-1.67742	2.97604	3.14271	-1.52546	-1.67249	-0.351626	-1.30103	4.67612	-1.57285	-0.15044	4.12079	3.03898	4.76751	-1.02947	4.76751	1.58936	-1.35138	-1.04535	-0.792648	-1.55614	-0.862626	-1.02774	3.44238	-1.64695	-1.48952	-0.895687	-1.59003	-0.299681	-1.64229	-1.40019	1.93442	-1.68781	4.06599	3.29504	-0.878027	-1.39765	-1.4982	-1.2248
hsa-miR-516b-5p	-1.28677	0.0121793	-2.92558	0.00433106	0.0101176	-3.17438	DOWN	-1.74038	-1.61738	3.60931	-1.57134	2.26749	5.90878	3.68271	-1.52546	4.23434	2.25239	4.02768	-1.11174	-1.57285	-0.519011	-1.4164	1.06431	4.22029	-1.02947	3.0674	4.7452	-1.35138	5.43067	-0.792648	0.901588	-0.862626	2.76234	1.39509	-0.608626	-1.48952	6.92143	-1.59003	-0.299681	3.63779	-1.40019	-1.72575	-1.68781	-1.47576	-1.5912	-0.878027	-1.39765	2.04532	-1.2248
hsa-miR-517-5p	-1.84344	0.979553	-3.90141	0.000181934	0.000606053	-0.207162	DOWN	2.36133	1.09566	-1.58516	4.52625	-1.67742	5.39673	3.83486	2.64439	4.92427	-1.52507	2.23589	4.19962	3.56125	4.22433	4.0404	1.22442	2.93552	2.75584	4.75389	-1.66996	-1.35138	-1.04535	-0.792648	-1.55614	4.11515	5.12412	2.75909	1.09566	4.04895	-0.895687	1.70978	-0.299681	-1.64229	4.01081	-0.246516	1.12188	-1.47576	3.59531	-0.878027	3.73177	-1.4982	4.41566
hsa-miR-517c-3p	-1.33268	0.437018	-3.04215	0.00306163	0.00751159	-2.85541	DOWN	0.402868	0.551467	-1.58516	-1.57134	0.616505	4.37348	6.25474	-1.52546	0.68022	3.40469	-1.30103	4.18721	1.65227	-1.64433	2.43436	-1.62845	-1.13091	2.81063	0.107275	2.77787	4.43089	-1.04535	-0.792648	-1.55614	-0.862626	4.49922	-1.50421	3.6039	2.36133	-0.895687	0.953407	4.53865	-1.64229	3.87047	-0.366604	1.61565	3.49273	5.10032	-0.878027	3.35285	1.15088	2.62262
hsa-miR-5187-3p	1.80529	0.195688	5.44233	4.33709e-07	2.4184e-06	5.61767	UP	0.642698	-1.61738	-1.58516	-1.57134	-0.273973	-1.2376	-1.55063	-1.52546	-1.67249	2.75	-1.30103	-1.11174	-1.57285	1.91809	-1.4164	-1.62845	-1.13091	-1.02947	3.02508	5.3942	-1.35138	-1.04535	-0.792648	-1.55614	-0.862626	-1.02774	-1.50421	0.711802	-1.48952	-0.895687	0.293604	-0.299681	-1.64229	-1.40019	1.96738	-1.68781	-1.47576	-1.5912	-0.878027	-1.39765	1.96738	-1.2248
hsa-miR-5189-3p	2.74706	2.95424	6.24154	1.31629e-08	9.45736e-08	9.03518	UP	3.83049	-1.61738	4.83567	-1.57134	3.49786	-1.2376	-1.55063	3.78235	2.73163	5.1029	-1.30103	-1.11174	-1.57285	-1.64433	-1.4164	-1.62845	-1.13091	4.7452	3.79535	6.3076	2.70235	-1.04535	6.47842	5.04347	4.15513	-1.02774	-1.50421	1.60689	1.85033	-0.895687	-1.59003	-0.299681	3.46258	3.48763	3.92302	2.35237	4.68036	1.4187	-0.878027	3.47727	4.24223	-1.2248
hsa-miR-518c-3p	-1.76531	1.15712	-3.53504	0.000640663	0.00185617	-1.39759	DOWN	-1.56814	0.365308	2.64216	3.38007	4.43565	4.93536	5.4137	4.7043	-1.67249	1.42822	3.13454	4.5679	3.9181	5.46637	4.71637	3.66754	5.55147	4.97241	2.42331	-1.66996	4.02768	-1.04535	-0.792648	-1.55614	-0.862626	4.65009	3.64677	1.12945	1.66357	-0.895687	2.6184	-0.299681	2.08978	4.87703	2.43823	-0.261725	3.38511	5.09605	-0.878027	3.0674	-1.4982	2.90998
hsa-miR-518d-3p	-3.00725	1.83667	-6.42645	5.71507e-09	4.37587e-08	9.85392	DOWN	2.27422	1.81212	0.960879	4.53081	2.5452	5.92464	5.81844	-1.52546	-0.0360659	2.47834	2.14851	4.74334	4.17942	-1.64433	5.23948	3.97823	4.85412	5.48179	4.12466	2.43823	4.00668	4.63807	-0.792648	-1.55614	-0.862626	5.05182	3.91954	5.4454	4.78769	3.66754	5.86246	5.37645	0.281231	-1.40019	2.13503	4.26919	4.83376	3.98919	-0.878027	4.83376	2.75909	4.64236
hsa-miR-518e-3p	-1.38864	1.18059	-2.85381	0.00533766	0.012116	-3.36561	DOWN	1.46447	5.22546	4.89462	1.32151	3.11787	4.56421	4.73251	2.00302	1.15088	-1.74038	-1.30103	-1.11174	3.50599	3.54051	1.58936	1.58724	4.60247	-1.02947	-1.68431	-1.66996	-1.35138	4.96342	-0.792648	4.29757	3.89259	-1.02774	-1.50421	2.75584	5.06179	-0.895687	-1.59003	5.1842	3.65375	-1.40019	2.54218	4.87703	2.57635	3.11787	3.73622	3.76212	1.26745	4.21816
hsa-miR-518f-5p	-1.41161	0.547458	-3.18444	0.00198051	0.00512615	-2.45238	DOWN	-0.508407	2.75292	0.836703	-1.57134	-1.67742	2.98839	3.7401	5.05182	4.5591	2.7853	4.32125	-1.11174	2.6184	2.42905	2.19112	2.81844	-1.13091	5.10032	1.56145	2.85211	-1.35138	-1.04535	-0.792648	-1.55614	3.39914	3.01742	-1.50421	-1.64695	-1.48952	-0.895687	-1.59003	-0.299681	3.50184	-1.40019	-1.72575	4.10271	-1.47576	2.85856	4.40606	2.58603	4.22813	3.93314
hsa-miR-5192	-2.02148	1.47502	-4.53048	1.76517e-05	7.19821e-05	2.02559	DOWN	4.78377	3.76695	1.1578	1.36522	2.79957	3.10224	-1.55063	4.42279	0.260297	-0.540049	4.78769	-1.11174	-1.57285	1.46197	2.34135	4.8479	3.22693	3.39207	2.59251	3.84957	4.46426	-1.04535	3.7401	4.13895	-0.862626	5.46637	4.44907	4.66999	5.11037	8.25386	3.14779	-0.299681	2.29326	-1.40019	3.78465	3.51096	5.15884	4.01956	3.87047	3.83907	5.11516	-1.2248
hsa-miR-5193	2.4798	2.39906	5.64788	1.79941e-07	1.06593e-06	6.47575	UP	3.6039	2.5316	5.28925	-1.57134	4.39029	-1.2376	-1.55063	3.04167	4.99551	0.707022	-1.30103	-1.11174	-1.57285	2.58203	2.57453	-1.62845	-1.13091	-1.02947	1.8091	-1.66996	-1.35138	4.82981	4.18352	3.23526	-0.862626	-1.02774	-1.50421	3.00196	1.67015	-0.895687	4.9073	-0.299681	5.16414	3.08538	1.67015	1.79538	-1.47576	-1.5912	-0.878027	-1.39765	-1.4982	2.64216
hsa-miR-5194	1.5026	0.624082	3.36796	0.00110762	0.00306067	-1.91097	UP	2.38063	2.01438	5.71793	1.89469	-1.21507	-1.2376	1.42591	-1.52546	3.87738	-1.44693	2.10562	-1.11174	-1.57285	2.80429	-1.4164	-1.62845	3.8232	-1.02947	-1.68431	-1.66996	-1.35138	-1.04535	-0.792648	-1.55614	-0.862626	-1.02774	-1.50421	0.774725	-1.48952	-0.895687	0.998341	-0.299681	2.51445	-1.40019	-0.597835	4.29757	-1.47576	-1.5912	-0.878027	-1.39765	-1.4982	2.67031
hsa-miR-5196-3p	1.7404	3.47943	4.34168	3.63143e-05	0.000138966	1.33216	UP	3.80931	4.42716	4.2996	3.13454	3.65096	-1.2376	4.49922	4.29757	1.69718	2.49464	3.15579	3.9181	2.85211	0.514275	3.94973	-1.62845	-1.13091	-1.02947	2.74629	0.965918	4.42716	-1.04535	-0.792648	2.05274	4.43089	2.81063	4.62931	5.3218	4.00323	-0.895687	2.66055	-0.299681	4.6246	4.99551	4.83567	4.59998	4.21604	4.88949	-0.878027	3.34831	5.03631	4.51676
hsa-miR-519a-3p	-1.63454	0.00422195	-3.87595	0.000199062	0.000649611	-0.292642	DOWN	-1.74038	-1.61738	0.930846	-1.57134	2.65555	-1.2376	1.76451	-1.52546	-1.01638	-1.74038	4.85024	3.72769	-1.57285	1.56813	5.03182	3.57742	-1.13091	-1.02947	-1.68431	1.83481	-1.35138	-1.04535	-0.792648	-1.55614	-0.862626	-1.02774	3.67607	-0.00774176	-1.48952	4.4536	3.62726	-0.299681	1.95998	3.02289	-1.72575	-1.68781	1.78054	3.63522	4.54649	4.7452	-1.4982	4.42279
hsa-miR-519c-5p	-2.49194	2.4752	-5.52608	3.03583e-07	1.75381e-06	5.9654	DOWN	3.97098	2.39397	5.01102	4.40821	5.06179	4.81976	5.34389	0.927033	2.83188	4.07065	2.57271	5.6931	-1.57285	4.98336	4.9768	5.18959	3.45734	-1.02947	5.56967	3.75529	3.59531	-1.04535	-0.792648	-1.55614	5.1842	5.63388	5.64345	2.49464	4.81153	3.63265	3.97823	-0.299681	4.64627	4.86852	5.32587	5.2304	3.73622	5.63131	5.02166	5.77132	4.11216	5.64011
hsa-miR-519d-3p	1.97979	1.97923	5.06673	2.08051e-06	1.00122e-05	4.09287	UP	1.76774	3.42758	-1.58516	1.75577	0.865879	5.27545	-1.55063	6.53024	-0.516484	2.43171	-1.30103	3.49018	3.02974	2.8402	2.69035	0.494143	3.13725	-1.02947	2.93758	1.49607	2.27422	-1.04535	3.84295	-1.55614	-0.862626	-1.02774	2.66543	-0.67044	-1.48952	-0.895687	-1.59003	-0.299681	3.33615	1.74523	2.27046	0.989956	-1.47576	2.11035	5.32587	-1.39765	-1.4982	-1.2248
hsa-miR-519d-5p	-2.67137	2.95012	-6.46286	4.84451e-09	3.83524e-08	10.0162	DOWN	4.00875	4.75389	-1.58516	5.29882	4.70207	-1.2376	4.7713	4.93738	2.85534	4.5679	4.16751	3.47727	5.05674	5.83114	5.18178	5.32587	5.30288	5.4611	5.64678	4.37156	2.26218	4.45684	-0.792648	3.09647	-0.862626	5.59032	5.88482	4.02351	5.03182	5.37645	4.9814	6.35714	2.52925	4.19962	4.45134	3.82847	5.07002	4.80516	5.47725	5.43558	3.45734	4.10831
hsa-miR-519e-5p	-2.06435	3.7808	-5.9144	5.63379e-08	3.63997e-07	7.61079	DOWN	4.66341	4.9768	4.22029	2.79251	5.22793	5.77132	6.97477	4.98921	4.73716	4.76045	5.71452	4.59308	4.44009	4.98336	5.71452	4.26109	4.83376	4.99331	5.25045	3.60755	4.78048	-1.04535	4.51246	0.77011	4.99331	6.22513	5.34164	5.84262	5.57881	6.2812	5.62254	5.33938	-1.64229	4.5506	4.44009	5.38632	4.5591	7.09342	5.23505	6.2501	3.312	5.89443
hsa-miR-520d-5p	-1.84206	3.07549	-5.26729	9.06633e-07	4.69801e-06	4.89983	DOWN	4.10271	4.26321	5.47725	3.85204	4.59528	5.33715	5.4264	4.59308	4.6246	2.72225	4.92644	-1.11174	4.88078	2.28507	4.12681	5.01521	3.50184	-1.02947	4.50348	1.65871	-1.35138	3.20571	4.60699	3.8011	4.65824	4.44009	5.046	5.29882	3.90121	3.96655	5.1473	5.94475	3.32885	3.27034	3.89466	4.53865	3.81377	3.08538	5.72135	5.00664	3.30163	5.47125
hsa-miR-520f-5p	-2.11023	2.69998	-5.3777	5.70149e-07	3.0788e-06	5.35124	DOWN	5.22174	4.16545	4.70207	5.08698	4.98533	3.66092	5.12412	4.66082	3.2886	4.19962	4.69786	-1.11174	5.3218	4.78048	4.38655	4.20836	4.4536	4.72469	4.52388	1.18685	-1.35138	6.92744	4.66785	2.86312	-0.862626	4.83758	5.24823	4.89671	5.046	-0.895687	2.32055	-0.299681	2.4051	3.28353	5.06815	5.13671	5.03182	4.02768	3.75724	5.39167	4.28985	4.88556
hsa-miR-520g-5p	-1.35188	-0.295971	-3.56811	0.000573701	0.00169143	-1.29372	DOWN	2.9121	0.658231	-1.58516	1.66168	-1.67742	4.36103	-1.55063	1.68984	2.90266	2.5452	-1.30103	-1.11174	-1.57285	1.64022	-1.4164	0.167736	-1.13091	-1.02947	-1.01025	5.48179	-1.35138	5.48835	-0.792648	2.43823	-0.862626	3.59754	3.83049	-1.64695	-1.48952	-0.895687	-1.59003	-0.299681	0.920505	-1.40019	0.139429	-1.22958	2.07226	1.42591	-0.878027	4.33309	-1.4982	-1.2248
hsa-miR-520h	-1.30438	1.25484	-2.76796	0.00682183	0.0150585	-3.58912	DOWN	0.71633	2.63286	-1.58516	2.35022	0.220374	4.45684	4.85873	1.47624	-0.0552527	-1.52324	-1.30103	2.63286	-1.57285	1.00089	4.91689	4.11216	5.15884	-1.02947	2.09735	4.96342	-1.35138	4.11515	-0.792648	1.3909	-0.862626	5.03182	3.75724	2.07447	-1.48952	-0.895687	-1.59003	-0.299681	0.833198	4.09829	2.16792	1.43987	2.04778	4.87499	-0.878027	3.05152	-1.4982	4.59748
hsa-miR-524-5p	-2.18539	1.43552	-4.73041	8.0727e-06	3.49771e-05	2.7801	DOWN	3.95368	-1.61738	-1.58516	3.17466	1.9853	-1.2376	5.89963	4.75389	2.0332	1.82044	5.50931	3.65654	4.37741	4.94553	4.60247	3.66754	5.26743	4.3351	4.72855	-0.239374	-1.35138	-1.04535	-0.792648	4.64627	3.88879	4.93536	3.7972	-0.283802	4.22813	-0.895687	4.49146	5.17397	-1.64229	4.64627	3.72547	4.11216	3.08953	5.3172	-0.878027	5.37645	1.80321	-1.2248
hsa-miR-526a	-1.69959	2.41938	-3.6861	0.000384884	0.0011809	-0.917253	DOWN	4.46426	4.28985	4.94142	7.30541	4.52388	6.40753	4.9791	4.91689	4.40821	3.58795	2.25984	-1.11174	5.2442	4.82981	4.01286	2.91714	5.39673	5.23948	0.855753	0.19322	-1.35138	3.10677	-0.792648	1.12188	5.16149	-1.02774	5.11277	5.26909	1.92615	4.62696	2.77787	-0.299681	5.04891	1.93442	3.50599	3.89259	2.13904	5.09192	-0.878027	3.03425	4.70812	3.81377
hsa-miR-526b-5p	-1.34618	0.640578	-2.99007	0.00357889	0.00857629	-2.99919	DOWN	2.88748	2.77787	2.10057	4.21021	2.69412	-1.2376	-1.55063	4.67612	4.72469	4.89462	3.18133	-1.11174	-1.57285	0.347396	4.02768	3.9372	4.88078	4.67612	-1.68431	3.34268	-1.35138	3.39914	-0.792648	-1.55614	3.33179	3.79535	-1.50421	-0.737418	2.26218	-0.895687	-1.59003	4.7713	4.15952	-1.40019	4.36748	1.86618	4.25235	-1.5912	-0.878027	1.64879	-1.4982	-1.2248
hsa-miR-527	-1.07693	2.78216	-2.87657	0.0049973	0.0114345	-3.30539	DOWN	2.01438	0.823099	3.5252	4.88949	2.27919	4.59308	2.62788	4.54649	2.78158	3.02015	5.74471	3.13998	4.69587	5.1343	2.74814	4.9768	4.32516	4.19498	4.97031	3.22955	-1.35138	-1.04535	-0.792648	3.46691	4.5591	4.79703	1.8224	4.12681	4.7713	-0.895687	2.57271	6.28467	5.27545	2.44946	-0.456209	5.01963	3.77166	1.72	4.44496	4.32888	5.53677	3.58552
hsa-miR-541-3p	-1.15104	0.17208	-2.71932	0.00782136	0.0168445	-3.71319	DOWN	2.77279	1.2017	-1.58516	-1.57134	-1.67742	4.62259	3.58552	-1.52546	4.28593	2.09896	3.98714	-1.11174	-1.57285	3.00653	2.5269	2.0843	4.69426	-1.02947	3.41639	1.59796	-1.35138	-1.04535	-0.792648	-1.55614	-0.862626	3.84709	3.312	3.64257	-1.48952	-0.895687	2.35237	-0.299681	-1.64229	-1.40019	-1.01025	-0.360516	-1.47576	1.88126	-0.878027	3.70231	-1.4982	3.63265
hsa-miR-542-5p	2.18498	2.59269	5.44944	4.20813e-07	2.3516e-06	5.64709	UP	3.2034	2.85856	3.65375	2.5269	1.59397	-1.2376	1.32473	-1.52546	2.91423	3.02726	-1.30103	2.75584	1.04963	3.76695	3.91276	3.27738	3.02726	3.0674	3.38511	4.66341	3.82847	-1.04535	4.11515	1.46447	4.25675	-1.02774	1.56538	0.384198	1.3183	3.72325	2.13503	-0.299681	4.73932	-1.40019	0.774725	3.72325	-1.47576	-1.5912	4.18352	-1.39765	-1.4982	-1.2248
hsa-miR-544a	-1.44669	-0.448219	-3.40643	0.000977939	0.00275347	-1.79447	DOWN	-1.6708	-1.61738	-1.58516	-1.57134	4.15141	3.78005	1.65575	-1.52546	-1.67249	-0.489484	-1.30103	-1.11174	-1.57285	-1.64433	-1.4164	1.76981	-1.13091	-1.02947	3.86814	-1.66996	-1.35138	4.57232	9.81192	3.98919	-0.862626	-1.02774	-1.50421	0.693473	-1.48952	3.92915	2.48044	-0.299681	2.95459	-1.40019	-1.72575	-1.68781	-1.47576	-1.5912	-0.878027	3.30163	-1.4982	2.98173
hsa-miR-548a-3p	-1.05635	0.478186	-2.24007	0.0274968	0.0498792	-4.8331	DOWN	3.00416	0.481308	1.75577	3.83907	1.3183	2.42704	-1.55063	-1.52546	-1.67249	2.72225	-1.30103	6.43033	4.89462	3.59754	2.61393	4.83376	3.05152	3.97823	-1.68431	-1.66996	4.5874	-1.04535	-0.792648	4.0404	5.57881	-1.02774	-1.50421	-1.64695	-1.48952	3.94973	-1.59003	-0.299681	-1.64229	-1.40019	-1.72575	2.42704	1.8567	3.23829	-0.878027	-1.39765	2.47623	-1.2248
hsa-miR-548a-5p	-1.0762	-0.426323	-2.76797	0.00682162	0.0150585	-3.5891	DOWN	1.07935	-1.61738	-1.58516	1.48918	0.938473	-1.2376	4.9791	3.9372	0.322352	2.5452	-1.30103	3.24649	-1.57285	-1.64433	-1.4164	1.01007	-1.13091	-1.02947	-1.68431	-0.854121	3.62726	5.83114	-0.792648	4.1756	-0.862626	-1.02774	-1.50421	3.56125	-1.48952	-0.895687	3.46691	-0.299681	-1.64229	-1.40019	-1.72575	-0.314242	-1.47576	-1.5912	-0.878027	-1.39765	-1.4982	-1.2248
hsa-miR-548ab	2.90129	0.34159	8.54199	2.67588e-13	3.94461e-12	19.6886	UP	-0.275659	-1.61738	-1.58516	-1.57134	-1.67742	-1.2376	-1.55063	-1.52546	-0.101758	-1.74038	-1.30103	-1.11174	-1.57285	-0.25522	-1.4164	-1.62845	-1.13091	-1.02947	-1.68431	-1.66996	2.71721	-1.04535	-0.792648	-1.55614	-0.862626	-1.02774	-1.50421	-1.64695	-1.48952	-0.895687	3.07299	-0.299681	-1.64229	-1.40019	-1.72575	-1.68781	4.19962	-1.5912	-0.878027	-1.39765	-1.4982	-1.2248
hsa-miR-548ad-3p	-1.08141	-0.896471	-3.64856	0.000437395	0.00132146	-1.03802	DOWN	-1.40457	1.37555	-1.58516	-1.57134	-1.67742	-1.2376	-1.55063	2.57635	-1.67249	0.587022	-1.30103	2.8933	-1.57285	-1.64433	3.39914	0.423022	-1.13091	-1.02947	-0.212121	3.18133	-1.35138	-1.04535	-0.792648	-1.55614	3.38007	-1.02774	-1.50421	-1.64695	-1.48952	-0.895687	4.27324	4.64627	4.11515	-1.40019	0.568368	-1.68781	-1.47576	-1.5912	-0.878027	-1.39765	-1.4982	-1.2248
hsa-miR-548aq-5p	-1.10839	-0.368953	-2.75575	0.00706108	0.0154668	-3.62044	DOWN	0.674571	-1.61738	-1.58516	-1.57134	-1.67742	2.7853	-1.55063	-1.52546	0.345352	4.78213	-1.30103	3.2034	3.96456	2.69035	-1.4164	-1.62845	4.04715	-1.02947	-1.68431	4.22029	-1.35138	-1.04535	-0.792648	-1.55614	3.40886	-1.02774	-1.50421	0.522253	-1.48952	5.86836	-1.59003	-0.299681	-1.64229	-1.40019	3.19669	-1.68781	-1.47576	-1.5912	3.57491	2.40924	1.19333	-1.2248
hsa-miR-548ar-3p	-1.24924	-0.713228	-3.89489	0.000186182	0.000616998	-0.229095	DOWN	-1.74038	-1.61738	2.41395	-1.57134	-1.67742	3.38007	-1.55063	2.75909	-1.67249	0.488418	-1.30103	-1.11174	-1.57285	1.19333	-1.4164	0.458791	-1.13091	-1.02947	-1.08048	-1.66996	-1.35138	5.20735	-0.792648	-1.55614	-0.862626	-1.02774	-1.50421	-0.427714	4.07065	-0.895687	3.53471	-0.299681	0.93522	-1.40019	-1.06204	2.38257	-1.47576	-1.5912	-0.878027	-1.39765	-1.4982	-1.2248
hsa-miR-548ar-5p	-1.2614	-0.14717	-2.8125	0.00601025	0.0135112	-3.47387	DOWN	0.80367	4.66341	1.42591	1.69945	0.23044	5.4264	1.76774	-1.52546	-1.67249	-1.43378	-1.30103	-1.11174	-1.57285	4.12252	2.31082	3.53471	-1.13091	-1.02947	-0.0360659	-1.66996	-1.35138	5.16414	7.44288	-1.55614	-0.862626	-1.02774	-1.50421	-0.674923	-1.48952	-0.895687	-1.59003	-0.299681	2.84316	1.96377	-1.72575	1.97449	-1.47576	-1.5912	3.20988	-1.39765	-1.4982	4.17942
hsa-miR-548as-5p	-1.28989	0.624449	-2.76283	0.00692141	0.0152259	-3.60229	DOWN	1.45715	-1.61738	4.52625	-1.57134	1.45715	4.0822	1.9481	-1.52546	4.25235	4.9073	-1.30103	3.74231	3.71041	-0.529462	-1.4164	0.293604	-1.13091	3.73622	-0.438912	1.88126	-1.35138	5.80519	4.07065	4.10651	5.26743	-1.02774	2.15948	1.78449	-1.48952	3.76695	0.840209	-0.299681	1.60689	-1.40019	-1.49735	-1.22958	-1.47576	-1.5912	-0.878027	3.07716	4.9814	3.12784
hsa-miR-548b-3p	-2.008	0.47991	-4.34472	3.59009e-05	0.000137647	1.34314	DOWN	4.65824	-0.025489	-1.58516	-1.57134	2.60769	-1.2376	5.56173	1.54892	-1.67249	-1.74038	-1.30103	3.49786	4.10831	-0.178011	5.20735	5.08518	-1.13091	3.63265	5.53677	-1.66996	2.65805	3.97823	-0.792648	-1.55614	-0.862626	-1.02774	1.76223	3.87505	4.84556	-0.895687	1.19333	-0.299681	-1.64229	-1.40019	3.80931	-0.231379	1.89073	5.21668	5.11037	4.46216	-1.4982	4.19962
hsa-miR-548bb-3p	-1.10154	-0.607007	-3.30522	0.00135431	0.00365279	-2.09874	DOWN	-0.629044	0.903571	1.49337	-1.57134	-0.111253	3.07924	3.5252	-1.52546	-1.67249	-1.74038	-1.30103	5.30804	1.12188	0.747659	-1.4164	-1.62845	3.50599	4.49146	-1.68431	-0.879385	-1.35138	-1.04535	-0.792648	-1.55614	-0.862626	3.70231	-1.50421	0.610495	-1.48952	-0.895687	2.25239	-0.299681	-1.64229	-1.40019	-1.02147	3.1657	1.40859	3.99593	-0.878027	-1.39765	-1.4982	-1.2248
hsa-miR-548c-3p	-1.0264	-0.642458	-2.95294	0.00399571	0.00942002	-3.10044	DOWN	-1.5694	-1.61738	-1.58516	-1.57134	-1.67742	3.35477	-1.55063	1.16557	-1.67249	-1.57541	-1.30103	-1.11174	4.3036	-1.64433	-1.4164	0.685132	-1.13091	-1.02947	2.42905	-0.301363	-1.35138	-1.04535	-0.792648	-1.55614	-0.862626	3.4337	3.13454	-1.64695	-1.48952	-0.895687	4.72469	-0.299681	-1.64229	1.75786	3.52753	-0.148396	-1.47576	4.46897	-0.878027	-1.39765	-1.4982	-1.2248
hsa-miR-548d-3p	-1.15495	0.9992	-2.50799	0.0138962	0.0278467	-4.23032	DOWN	-0.817319	-1.61738	1.37811	1.37019	-1.67742	-1.2376	-1.55063	3.63522	-1.02601	3.79915	-1.30103	3.99593	0.711802	0.240846	4.48286	4.94763	-1.13091	2.76234	2.58603	2.51805	4.43787	4.02768	3.84957	2.50096	-0.862626	-1.02774	2.55162	3.42758	-1.48952	3.62726	4.26533	4.93536	-1.64229	5.43067	-1.72575	-0.00452747	2.04287	2.25441	3.47727	-1.39765	3.23241	-1.2248
hsa-miR-548d-5p	-1.59428	-0.0599595	-3.54243	0.000625081	0.00182404	-1.37443	DOWN	-1.73075	-1.61738	-1.58516	-1.57134	-0.978044	-1.2376	-1.55063	-1.52546	-1.05505	-1.53952	2.60769	4.9768	-1.57285	-1.64433	2.66055	-1.62845	-1.13091	-1.02947	3.15881	2.57271	-1.35138	3.57992	-0.792648	-1.55614	-0.862626	-1.02774	3.16791	7.70108	-1.48952	-0.895687	3.44726	6.27005	3.70569	3.95755	1.55674	-0.173901	-1.47576	3.08538	3.99123	4.5506	-1.4982	3.21507
hsa-miR-548g-3p	-1.1762	-0.582321	-3.21938	0.00177601	0.00464368	-2.35115	DOWN	-1.74038	2.50096	4.31928	-1.57134	-0.310407	-1.2376	-1.55063	-1.52546	-1.67249	1.28407	3.05477	2.59977	-1.57285	0.592747	-1.4164	-1.62845	-1.13091	-1.02947	3.21841	-1.66996	-1.35138	4.39821	-0.792648	-1.55614	-0.862626	-1.02774	-1.50421	2.89996	1.76774	-0.895687	1.50826	-0.299681	-1.64229	1.72	-1.72575	-0.442165	-1.47576	3.45996	-0.878027	4.12252	-1.4982	-1.2248
hsa-miR-548q	1.71297	4.60649	4.37929	3.14981e-05	0.000122972	1.46874	UP	5.59536	5.53091	-1.58516	0.818363	5.56684	-1.2376	2.98621	4.1047	5.03863	5.95279	5.046	5.74471	5.14921	3.74231	4.52388	5.50931	5.08518	5.58468	4.51461	7.68901	3.26537	-1.04535	4.01081	5.43558	4.17144	4.41776	3.60755	-0.652044	3.95755	-0.895687	3.57992	-0.299681	5.12796	4.91468	5.37146	5.25267	5.13671	4.09587	-0.878027	5.10032	5.26743	4.1634
hsa-miR-548s	-1.35555	1.1007	-2.63038	0.0100001	0.0208709	-3.93521	DOWN	-1.62484	3.25823	5.09192	-1.57134	3.15579	4.64627	4.54649	-1.52546	0.129352	1.19333	-1.30103	5.09399	2.73627	-1.64433	5.99175	2.0332	3.15579	-1.02947	0.227648	-1.66996	3.70805	-1.04535	3.9372	2.07667	-0.862626	4.81976	2.05274	4.44009	2.74065	-0.895687	4.99974	-0.299681	-1.64229	5.09819	1.28122	-1.32105	3.19902	5.92464	3.38007	3.75333	1.09193	4.44907
hsa-miR-548t-5p	-1.94731	-0.0607434	-4.8872	4.31619e-06	1.97344e-05	3.38557	DOWN	-1.46748	-1.61738	-1.58516	1.81212	-1.07747	4.7559	-1.55063	-1.52546	0.808703	-0.323736	3.38007	4.46897	4.91689	4.99331	-1.4164	2.41395	-1.13091	4.03693	2.18501	-1.66996	-1.35138	3.39475	-0.792648	-1.55614	-0.862626	-1.02774	4.02559	2.76503	2.36484	3.68271	-1.59003	-0.299681	1.40859	-1.40019	0.250549	2.75909	-1.47576	4.13491	-0.878027	-1.39765	1.81624	4.03248
hsa-miR-548w	-1.89836	0.150996	-3.88862	0.000190356	0.000627588	-0.250162	DOWN	3.06034	-1.61738	-1.58516	-1.57134	2.00302	3.77588	6.91016	-1.52546	-1.67249	0.0898956	4.5679	-1.11174	4.37348	8.9811	-1.4164	-1.62845	-1.13091	5.04095	2.58203	-0.38589	4.32516	-1.04535	-0.792648	-1.55614	-0.862626	5.16924	-1.50421	3.98509	2.67031	-0.895687	4.08657	-0.299681	-1.64229	-1.40019	-1.72575	-1.68781	3.79351	4.90246	-0.878027	4.21604	-1.4982	3.42256
hsa-miR-550a-3-5p	-1.27237	2.83205	-3.25106	0.00160782	0.00425599	-2.25862	DOWN	3.91095	1.48918	4.27735	5.60142	4.11024	4.37959	3.08953	2.66055	4.22813	3.97823	-1.30103	-1.11174	3.13998	3.86581	3.41639	4.01724	5.55667	4.44907	4.91689	4.85024	-1.35138	4.14305	5.2304	3.83049	4.95574	4.5506	4.12079	5.38632	3.27738	3.80497	-1.59003	-0.299681	2.95053	4.63807	-0.156478	2.21975	3.95562	5.0237	3.92915	3.27386	4.47346	5.3172
hsa-miR-550a-3p	1.26192	0.992832	2.988	0.00360103	0.00860823	-3.00486	UP	3.61108	1.91989	-1.58516	-1.57134	-1.67742	3.49273	3.59531	4.25455	-1.67249	0.794615	-1.30103	2.58603	-1.57285	1.74834	-1.4164	3.0089	-1.13091	-1.02947	-1.68431	1.56813	-1.35138	-1.04535	-0.792648	3.86814	-0.862626	-1.02774	3.43064	-1.64695	-1.48952	-0.895687	1.85033	-0.299681	-1.64229	-1.40019	2.27919	4.34136	-1.47576	1.61143	-0.878027	-1.39765	1.06785	-1.2248
hsa-miR-550b-3p	2.6947	0.374589	8.42589	4.683e-13	6.59685e-12	19.1347	UP	3.68813	-1.61738	0.799462	-1.57134	-1.67742	-1.2376	-1.55063	-1.52546	-1.67249	-1.74038	-1.30103	-1.11174	-1.57285	-1.64433	-1.4164	-1.62845	-1.13091	-1.02947	-1.68431	4.141	-1.35138	-1.04535	-0.792648	-1.55614	-0.862626	-1.02774	1.55674	-1.64695	-1.48952	-0.895687	0.693473	-0.299681	-1.64229	-1.40019	-1.56509	0.503967	-1.47576	-1.5912	-0.878027	-1.39765	-1.4982	-1.2248
hsa-miR-551a	1.58996	1.26293	3.57609	0.000558576	0.00165609	-1.26857	UP	-1.6449	-1.61738	-1.58516	1.95609	3.27034	-1.2376	-1.55063	-1.52546	4.26919	-1.74038	-1.30103	-1.11174	-1.57285	3.03425	-1.4164	5.13188	-1.13091	-1.02947	4.96342	-1.66996	-1.35138	-1.04535	3.69771	3.50184	3.8836	-1.02774	2.73163	2.98621	-1.48952	-0.895687	3.76695	-0.299681	3.86814	-1.40019	2.32863	1.84452	-1.47576	-1.5912	4.32516	-1.39765	-1.4982	-1.2248
hsa-miR-551b-5p	-2.2399	4.78265	-6.2758	1.12849e-08	8.19994e-08	9.18617	DOWN	5.77757	5.88482	7.09342	7.90949	5.40174	5.88175	6.87915	6.38911	3.29504	6.59696	7.29533	5.21668	6.43033	7.12032	7.05858	6.91016	7.35304	6.85357	5.79335	4.52853	4.57011	-1.04535	5.04095	5.56684	4.85024	6.85357	6.38911	6.07618	6.69642	5.19915	5.64678	-0.299681	5.15884	5.24823	7.02346	6.77241	5.8879	6.64488	7.53713	6.68604	6.47399	6.16264
hsa-miR-555	-1.07071	-0.542116	-2.9378	0.00417814	0.00980505	-3.14141	DOWN	-1.52507	-1.61738	-1.58516	1.2017	-0.948544	-1.2376	5.65225	0.983374	-1.67249	-1.44943	-1.30103	-1.11174	0.77011	-1.64433	-1.4164	-1.62845	-1.13091	-1.02947	2.92525	-1.66996	-1.35138	-1.04535	-0.792648	-1.55614	-0.862626	-1.02774	2.25441	3.21173	2.76771	-0.895687	3.16376	-0.299681	-1.64229	-1.40019	-1.72575	2.61393	2.3339	5.12412	-0.878027	3.18133	-1.4982	4.80959
hsa-miR-556-3p	-1.19402	0.110162	-2.74139	0.00735235	0.0159956	-3.65713	DOWN	2.15948	2.00985	-1.58516	3.89673	0.35156	-1.2376	5.1842	-1.52546	-0.510593	-1.74038	-1.30103	4.56165	2.2767	3.89897	4.34504	2.1637	2.84613	-1.02947	-0.98256	-1.66996	-1.35138	-1.04535	-0.792648	-1.55614	-0.862626	-1.02774	3.48542	-1.64695	4.40391	-0.895687	5.54441	-0.299681	1.68056	5.21185	1.70463	0.0877912	-1.47576	5.07235	-0.878027	2.61026	-1.4982	-1.2248
hsa-miR-5572	1.11988	6.56512	10.4962	2.10475e-17	5.34524e-16	29.0555	UP	6.08343	6.59167	6.24615	6.55424	6.14173	6.94792	3.65096	5.76473	5.53091	5.89443	6.44729	5.54159	6.11156	6.08735	5.95279	6.35714	5.57881	6.43033	6.17014	5.77445	6.05657	6.10103	6.18622	6.11525	6.32162	5.9344	6.0524	6.71673	6.34453	5.89443	6.57651	6.12799	6.30065	6.13509	5.65827	5.58468	5.19915	5.80519	5.77757	5.95279	6.12799	6.67492
hsa-miR-5581-3p	2.19576	1.17852	5.3047	7.75183e-07	4.07784e-06	5.05221	UP	3.43766	3.51548	-1.58516	-1.57134	-1.67742	-1.2376	-1.55063	-1.52546	-1.67249	1.76612	-1.30103	-1.11174	4.03248	4.17942	-1.4164	4.053	-1.13091	-1.02947	3.45996	5.20132	-1.35138	-1.04535	-0.792648	-1.55614	3.73622	-1.02774	-1.50421	-1.64695	-1.48952	-0.895687	4.39029	-0.299681	0.435341	-1.40019	2.97604	-0.448473	-1.47576	-1.5912	-0.878027	-1.39765	2.68346	-1.2248
hsa-miR-5581-5p	3.81121	1.70127	9.65059	1.25186e-15	2.41431e-14	25.0033	UP	3.23526	-1.61738	-1.58516	-1.57134	-0.928681	-1.2376	1.30542	1.52004	1.84742	0.227648	-1.30103	-1.11174	-1.57285	-1.64433	-1.4164	0.918231	-1.13091	-1.02947	-1.68431	5.46637	-1.35138	-1.04535	-0.792648	-1.55614	-0.862626	-1.02774	-1.50421	-1.64695	-1.48952	5.28078	3.26282	-0.299681	-1.64229	-1.40019	2.81063	-0.132143	2.97604	-1.5912	-0.878027	2.24268	2.56656	-1.2248
hsa-miR-5584-3p	1.56877	0.632805	3.88698	0.000191463	0.000630426	-0.255669	UP	4.36318	-1.61738	1.92615	-1.57134	-1.67742	-1.2376	-1.55063	0.941725	-0.786615	1.51388	-1.30103	-1.11174	2.3882	-1.64433	-1.4164	2.37869	-1.13091	-1.02947	1.19333	-1.66996	2.02826	-1.04535	-0.792648	2.62788	-0.862626	-1.02774	-1.50421	-1.64695	-1.48952	-0.895687	0.34944	-0.299681	4.0885	-1.40019	-0.870368	1.42591	-1.47576	-1.5912	-0.878027	1.96377	-1.4982	-1.2248
hsa-miR-5585-3p	1.73301	4.06166	3.79856	0.000261097	0.000832977	-0.550027	UP	1.6949	4.47863	5.08698	-1.57134	4.19498	4.72469	5.64011	4.25455	-0.168626	4.83567	6.36559	6.27005	3.99593	3.41639	4.54649	4.94344	4.10071	4.04535	-0.987264	-0.608626	-1.35138	-1.04535	-0.792648	2.02826	5.20735	4.353	4.18352	5.4264	2.92004	-0.895687	4.14943	-0.299681	7.8257	4.64236	3.59977	-1.68781	4.79222	4.20836	-0.878027	4.75389	5.23948	6.5203
hsa-miR-5586-3p	-2.43055	0.270165	-5.9948	3.95216e-08	2.63992e-07	7.95778	DOWN	3.85591	3.46475	-1.58516	4.63807	1.63493	4.64236	2.74629	1.28407	-1.67249	3.14525	-1.30103	-1.11174	3.87505	2.19831	3.84295	3.95368	3.89259	-1.02947	4.13305	-1.66996	-1.35138	-1.04535	-0.792648	-1.55614	-0.862626	-1.02774	-1.50421	3.29504	3.38511	-0.895687	4.89671	-0.299681	-1.64229	3.35285	4.00496	-1.35504	3.59531	5.55147	-0.878027	3.01742	2.4051	-1.2248
hsa-miR-5587-3p	2.10335	2.34359	4.79264	6.30452e-06	2.79777e-05	3.01901	UP	1.47052	3.65096	4.06599	-1.57134	4.00668	-1.2376	-1.55063	-1.52546	-1.67249	-0.533978	4.51913	5.88175	1.94586	2.49751	2.95053	2.53434	-1.13091	-1.02947	-1.68431	-1.66996	-1.35138	-1.04535	-0.792648	3.66501	-0.862626	3.51548	3.40886	-0.496077	-1.48952	-0.895687	2.38063	-0.299681	1.3183	-1.40019	2.95256	4.15952	3.37069	0.485505	-0.878027	4.34699	3.47162	-1.2248
hsa-miR-5588-3p	1.22516	0.377993	2.94822	0.00405174	0.00953459	-3.11322	UP	-1.64048	-1.61738	-1.58516	-1.57134	-1.67742	-1.2376	-1.55063	3.73816	0.111527	0.143978	-1.30103	-1.11174	-1.57285	-1.64433	-1.4164	-1.62845	-1.13091	2.99526	2.40107	4.99331	-1.35138	6.46538	-0.792648	-1.55614	-0.862626	-1.02774	-1.50421	5.37875	-1.48952	-0.895687	-1.59003	-0.299681	4.28593	2.24268	1.75144	-1.68781	2.89039	0.571407	-0.878027	-1.39765	-1.4982	-1.2248
hsa-miR-5589-5p	2.98832	1.80733	7.91116	5.53868e-12	6.37073e-11	16.6919	UP	2.3724	3.2034	-1.58516	1.95998	1.45107	-1.2376	-1.55063	0.933033	-0.38589	-1.59788	-1.30103	-1.11174	1.15088	3.14779	-1.4164	-1.62845	-1.13091	-1.02947	-0.686451	0.290654	-1.35138	-1.04535	5.16414	5.08518	-0.862626	-1.02774	2.43436	3.72547	-1.48952	-0.895687	2.14205	-0.299681	0.582495	3.17466	-1.45158	2.97137	2.02422	-1.5912	-0.878027	-1.39765	-1.4982	-1.2248
hsa-miR-559	-1.2374	-0.800844	-3.51262	0.000690188	0.00198024	-1.46759	DOWN	-1.74038	2.48587	-1.58516	-1.57134	-1.67742	4.02768	-1.55063	-1.52546	-0.251341	-1.74038	-1.30103	-1.11174	-1.57285	2.90767	-1.4164	4.86852	-1.13091	-1.02947	-1.68431	-1.66996	-1.35138	-1.04535	-0.792648	-1.55614	-0.862626	-1.02774	-1.50421	0.624571	4.5874	-0.895687	0.496956	-0.299681	-1.64229	-1.40019	-1.72575	-0.662198	-1.47576	2.49177	-0.878027	3.82077	-1.4982	3.54315
hsa-miR-562	-1.12808	-0.886578	-3.9776	0.000138684	0.00047241	0.051058	DOWN	-1.34852	-1.61738	-1.58516	1.63151	-1.08547	3.24132	3.18799	-1.52546	-1.67249	-1.74038	4.65402	-1.11174	-1.57285	0.0371758	-1.4164	0.203055	-1.13091	-1.02947	0.790385	-1.66996	-1.35138	-1.04535	-0.792648	0.962956	-0.862626	-1.02774	1.32151	-1.64695	-1.48952	-0.895687	-1.59003	-0.299681	-1.64229	4.053	2.78158	-1.68781	-1.47576	-1.5912	4.0822	-1.39765	2.20943	-1.2248
hsa-miR-564	2.09534	4.40691	6.14244	2.05117e-08	1.42196e-07	8.60026	UP	5.19348	2.54218	5.2831	4.7559	4.66341	5.23948	4.10071	4.82981	3.64886	0.8875	3.51096	4.74888	5.2941	1.35236	4.31516	2.92525	2.5269	3.57491	5.45105	4.43787	-1.35138	-1.04535	-0.792648	4.50987	-0.862626	4.15952	2.57635	4.13491	2.44946	3.52029	5.03182	-0.299681	4.57736	4.72855	3.32364	4.06832	4.46216	2.73163	-0.878027	4.93941	3.77588	4.52388
hsa-miR-5681a	-1.33234	-0.574648	-4.19077	6.38206e-05	0.000229593	0.79187	DOWN	0.895473	-1.61738	2.38257	2.14851	0.250549	-1.2376	-1.55063	2.51805	-1.67249	-1.74038	-1.30103	-1.11174	3.73622	2.95704	1.96738	-1.62845	-1.13091	-1.02947	-1.2468	-1.66996	-1.35138	-1.04535	-0.792648	-1.55614	-0.862626	2.93965	-1.50421	1.81624	-1.48952	-0.895687	-1.59003	-0.299681	-1.64229	-1.40019	1.29235	3.54579	-1.47576	-1.5912	-0.878027	2.8933	1.68293	3.39914
hsa-miR-5681b	1.81725	-0.08132	5.52721	3.02121e-07	1.7493e-06	5.97011	UP	-0.567423	-1.61738	-1.58516	-1.57134	-0.0965934	-1.2376	-1.55063	-1.52546	0.0371758	-1.30103	-1.30103	-1.11174	-1.57285	3.01742	-1.4164	-1.62845	-1.13091	4.52625	-1.68431	-1.66996	-1.35138	-1.04535	-0.792648	1.43631	-0.862626	-1.02774	-1.50421	-1.64695	-1.48952	-0.895687	-1.59003	-0.299681	2.93965	-1.40019	-1.72575	-1.2062	-1.47576	-1.5912	-0.878027	-1.39765	-1.4982	-1.2248
hsa-miR-5685	1.26322	1.50088	2.89389	0.00475174	0.0109595	-3.2593	UP	1.2387	-1.61738	4.54232	-1.57134	-1.67742	-1.2376	-1.55063	2.98839	-0.433901	4.01956	-1.30103	2.99975	-1.57285	1.78252	-1.4164	0.890286	-1.13091	4.32321	2.43823	4.5591	-1.35138	-1.04535	-0.792648	3.7888	4.19498	-1.02774	-1.50421	2.79604	1.94586	-0.895687	1.36522	4.57232	0.134835	1.86221	3.64677	-0.0835385	4.02351	-1.5912	-0.878027	2.00532	2.38996	-1.2248
hsa-miR-5690	-1.25699	0.220919	-2.91809	0.00442722	0.0103141	-3.19451	DOWN	4.1171	4.54048	-1.58516	-1.57134	-1.67742	3.99123	4.63135	-1.52546	-1.05097	-1.30354	-1.30103	3.75724	2.00532	1.34189	-1.4164	-1.62845	-1.13091	-1.02947	0.592747	0.134835	-1.35138	-1.04535	-0.792648	-1.55614	-0.862626	4.94344	4.53457	1.70978	-1.48952	-0.895687	4.86852	-0.299681	-1.64229	-1.40019	2.33632	-1.68781	3.44726	5.90878	-0.878027	-1.39765	-1.4982	2.97604
hsa-miR-5691	-1.01359	-0.475182	-2.5103	0.0138113	0.0276982	-4.22485	DOWN	-0.615923	-1.61738	-1.58516	-1.57134	-1.67742	-1.2376	4.02768	2.81844	0.338967	-0.683764	-1.30103	-1.11174	-1.57285	-1.64433	-1.4164	-1.62845	4.0404	-1.02947	-0.97022	-1.66996	-1.35138	-1.04535	-0.792648	2.80193	3.71041	4.49146	-1.50421	-1.64695	4.80317	4.58954	3.98303	-0.299681	0.895473	-1.40019	-1.72575	-1.68781	3.56989	1.93727	-0.878027	-1.39765	1.21649	-1.2248
hsa-miR-5692a	-1.08514	-0.384411	-2.87915	0.00495989	0.0113794	-3.29852	DOWN	1.7536	-1.61738	-1.58516	-1.57134	-1.67742	-1.2376	4.88556	2.93552	-1.67249	-1.42196	-1.30103	3.67199	1.14479	-1.64433	-1.4164	0.336126	3.68271	-1.02947	1.88575	-1.66996	-1.35138	-1.04535	-0.792648	-1.55614	-0.862626	3.15233	-1.50421	0.972352	4.97241	-0.895687	4.62931	-0.299681	-1.64229	-1.40019	-1.55423	-1.68781	2.82491	3.63522	-0.878027	2.79957	-1.4982	-1.2248
hsa-miR-5692b	-2.38438	0.423637	-5.44061	4.3687e-07	2.43074e-06	5.6106	DOWN	0.107275	2.44545	-1.58516	-1.57134	-1.13393	-1.2376	4.70621	2.08978	1.12945	-0.185956	2.3724	3.76212	1.54892	1.89763	4.96342	3.90575	5.00178	5.79335	-1.68431	2.27919	3.7401	-1.04535	-0.792648	-1.55614	-0.862626	-1.02774	-1.50421	2.54823	3.09469	-0.895687	4.94763	-0.299681	0.0877912	5.34389	-1.49054	-1.68781	5.38632	4.94344	3.34831	5.54159	-1.4982	-1.2248
hsa-miR-5695	-1.28894	-0.566681	-3.50526	0.000707205	0.00202228	-1.49047	DOWN	-1.60848	2.97888	-1.58516	-1.57134	-1.67742	-1.2376	2.99292	-1.52546	-0.53172	4.54649	-1.30103	-1.11174	1.95609	-0.435593	-1.4164	-1.62845	-1.13091	-1.02947	-0.010956	-1.66996	2.88748	5.10547	5.20735	-1.55614	-0.862626	3.8011	-1.50421	-1.64695	3.59977	-0.895687	1.62809	-0.299681	-1.64229	-1.40019	-1.2697	-1.68781	-1.47576	2.67031	4.55407	-1.39765	1.81212	-1.2248
hsa-miR-5698	1.08899	6.11242	5.67559	1.59642e-07	9.545e-07	6.59263	UP	6.22513	6.10435	6.87915	6.31451	5.99958	3.37334	5.73312	5.65827	5.91263	6.94069	5.99958	4.07912	5.33938	4.36103	6.18622	6.16264	6.07618	6.76149	5.4264	6.19291	5.89963	5.57251	6.04852	5.7392	6.32925	5.64011	6.50222	6.18622	6.14173	6.22513	6.41923	5.72135	4.49475	4.46897	6.43033	5.56173	4.9073	3.37599	4.32888	5.56173	5.8879	6.46538
hsa-miR-5699-5p	1.8008	3.07261	4.59153	1.39279e-05	5.79954e-05	2.25384	UP	4.23434	4.01081	1.53295	2.71973	4.16947	-1.2376	3.39695	-1.52546	3.07716	-0.85989	-1.30103	-1.11174	4.8988	-1.64433	3.2886	4.12252	3.44002	4.01724	6.02186	1.32473	-1.35138	4.71637	-0.792648	4.95114	3.27738	-1.02774	4.47863	1.8567	3.50847	5.32587	1.86221	-0.299681	5.70793	3.85591	3.5724	3.85204	3.66092	-1.5912	3.38511	-1.39765	-1.4982	-1.2248
hsa-miR-5704	-1.47144	0.145982	-3.32347	0.00127767	0.0034643	-2.04439	DOWN	0.124615	-1.61738	-1.58516	-1.57134	2.10057	2.36929	5.10547	-1.52546	-0.844143	-1.74038	4.00668	-1.11174	-1.57285	-1.64433	5.13857	3.05152	-1.13091	-1.02947	0.68022	0.560143	4.33711	-1.04535	-0.792648	-1.55614	-0.862626	3.36582	-1.50421	4.51461	4.2481	-0.895687	3.8836	-0.299681	-1.64229	5.39673	4.17942	2.00071	4.85412	5.29882	-0.878027	-1.39765	2.58403	-1.2248
hsa-miR-5706	-1.35801	-0.57298	-3.76972	0.000288614	0.000908337	-0.644959	DOWN	9.14214	2.93965	2.0332	1.79145	-1.67742	-1.2376	-1.55063	-1.52546	3.17466	-1.45041	-1.30103	-1.11174	1.10126	-1.64433	3.1657	0.10356	-1.13091	-1.02947	-1.68431	1.73373	-1.35138	-1.04535	-0.792648	-1.55614	-0.862626	-1.02774	-1.50421	0.592747	1.3909	-0.895687	1.81212	-0.299681	-1.64229	-1.40019	1.04605	0.592747	-1.47576	5.28734	-0.878027	-1.39765	-1.4982	-1.2248
hsa-miR-5707	-1.31015	0.143873	-2.94509	0.00408938	0.00960556	-3.12171	DOWN	-1.3423	2.46383	-1.58516	-1.57134	0.183571	4.65613	-1.55063	-1.52546	-1.67249	-1.74038	-1.30103	-1.11174	-1.57285	-0.411462	-1.4164	1.92169	-1.13091	-1.02947	-1.68431	-0.789253	-1.35138	-1.04535	4.03471	-1.55614	-0.862626	4.69786	1.13625	0.941725	5.36714	-0.895687	4.29543	-0.299681	3.71535	2.98839	-0.0214286	1.94586	-1.47576	3.8862	4.28593	4.66341	-1.4982	3.50391
hsa-miR-571	-1.28409	0.504822	-2.95578	0.00396232	0.00935853	-3.09273	DOWN	0.0201978	-1.61738	0.915956	-1.57134	-1.67742	2.65555	1.2017	-1.52546	2.07667	1.24084	-1.30103	5.38632	2.59251	-1.64433	4.63807	4.72855	-1.13091	-1.02947	-0.0886374	-0.85989	3.96456	-1.04535	-0.792648	-1.55614	-0.862626	4.27735	4.11216	1.60336	4.94344	-0.895687	3.97098	-0.299681	4.30914	4.35658	-1.72575	1.19333	-1.47576	5.72135	-0.878027	2.16792	-1.4982	3.90575
hsa-miR-572	1.72362	4.39377	4.81291	5.81482e-06	2.59392e-05	3.09719	UP	3.89259	4.56605	5.71793	3.15006	3.89466	2.48587	2.69941	4.64627	3.48321	4.86852	5.23505	6.38135	5.28925	5.72135	5.27545	4.41566	3.64257	5.78281	5.14921	2.62525	4.99331	-1.04535	-0.792648	3.75095	3.34268	4.78377	4.8988	4.9221	4.35881	-0.895687	4.11216	-0.299681	5.23948	6.28847	4.69265	4.64627	3.92099	6.39353	5.62874	3.4337	1.71266	4.66082
hsa-miR-573	-1.01781	-0.130369	-2.45821	0.0158374	0.0312243	-4.34686	DOWN	2.61393	-1.61738	-1.58516	-1.57134	-1.67742	-1.2376	4.24223	4.57232	-1.67249	-1.74038	-1.30103	-1.11174	1.00089	3.75333	-1.4164	1.48918	4.9814	-1.02947	1.55073	-1.66996	-1.35138	-1.04535	-0.792648	2.58603	-0.862626	3.18799	1.53103	-1.64695	-1.48952	-0.895687	0.682676	-0.299681	0.0251758	3.94143	2.23589	2.82491	-1.47576	4.55407	4.47346	4.01491	-1.4982	-1.2248
hsa-miR-574-3p	1.86281	4.23597	5.2547	9.55593e-07	4.93178e-06	4.84868	UP	4.78769	3.46475	3.00196	4.84556	4.74704	-1.2376	1.90057	6.02871	3.05152	4.62259	4.38655	-1.11174	4.56605	5.63388	4.29543	2.99975	4.53457	4.38416	5.37875	2.25239	4.26109	-1.04535	-0.792648	3.05803	-0.862626	5.50931	5.42101	1.75144	2.01634	-0.895687	5.73616	-0.299681	-0.387984	5.4162	5.28734	4.72275	4.23631	4.9977	4.78377	-1.39765	4.38842	4.27324
hsa-miR-574-5p	3.07106	2.34117	7.77788	1.04608e-11	1.18726e-10	16.0637	UP	4.32125	3.5252	0.423022	1.35786	1.67862	-1.2376	-1.55063	2.33874	-1.67249	1.12945	-1.30103	-1.11174	-1.57285	3.34831	1.97449	3.59977	-1.13091	-1.02947	3.36582	-1.66996	6.25937	-1.04535	-0.792648	-1.55614	3.2886	-1.02774	-1.50421	-1.64695	-1.48952	-0.895687	4.34699	-0.299681	1.74834	3.34268	3.96456	0.485505	-1.47576	3.18799	-0.878027	3.63265	-1.4982	-1.2248
hsa-miR-575	3.50519	5.87844	11.9056	2.5318e-20	8.77577e-19	35.7274	UP	5.26281	5.53677	5.92464	4.84196	5.11037	5.8372	5.67074	4.21205	5.30288	4.4536	5.05428	5.62874	5.3693	3.62309	5.00178	5.03631	5.69012	5.15436	3.71535	2.24268	3.93517	-1.04535	4.58526	5.08518	4.87891	5.72797	5.09399	4.77593	6.27774	-0.895687	4.24601	-0.299681	-1.64229	3.40469	4.55407	5.25724	4.39821	4.53457	4.7043	5.38632	3.68813	3.16376
hsa-miR-576-3p	-1.07393	-0.98691	-3.89961	0.000183099	0.000609142	-0.213227	DOWN	-1.69779	0.818363	-1.58516	1.89073	-1.67742	-1.2376	-1.55063	-1.52546	-1.67249	2.19112	-1.30103	3.25823	-1.57285	-1.64433	-1.4164	-1.62845	-1.13091	-1.02947	-0.493676	-0.576214	-1.35138	-1.04535	-0.792648	-1.55614	-0.862626	-1.02774	-1.50421	1.3677	3.06034	-0.895687	-1.59003	-0.299681	-1.64229	-1.40019	-1.72575	-1.68781	-1.47576	-1.5912	6.23286	2.61393	1.87897	2.44545
hsa-miR-578	-1.2564	-0.0104718	-2.9939	0.00353822	0.00849769	-2.98868	DOWN	1.72868	-1.61738	-1.58516	3.83268	-1.67742	-1.2376	4.4536	5.70793	-1.67249	-0.295203	3.92915	3.39475	1.53657	1.55909	-1.4164	5.27075	-1.13091	3.52029	-1.68431	2.59977	3.83907	-1.04535	4.57736	-1.55614	-0.862626	-1.02774	4.16947	2.97137	1.95322	-0.895687	-1.59003	-0.299681	-1.64229	4.1634	-0.448473	0.658231	-1.47576	-1.5912	-0.878027	-1.39765	-1.4982	-1.2248
hsa-miR-582-3p	-1.96693	0.226705	-5.07659	1.99796e-06	9.66939e-06	4.13216	DOWN	1.66168	-1.61738	-1.58516	3.19436	2.32863	2.81063	2.72225	-1.52546	2.05964	-0.920187	4.78048	-1.11174	1.48495	2.93552	2.08978	2.93238	-1.13091	-1.02947	-1.68431	-1.66996	-1.35138	4.99126	3.60184	1.92392	-0.862626	4.94938	1.73626	2.3882	3.77797	-0.895687	2.34397	-0.299681	1.3909	-1.40019	1.36522	2.65555	-1.47576	4.18147	-0.878027	-1.39765	1.09193	3.91457
hsa-miR-584-3p	1.87933	-0.00625752	5.66566	1.66642e-07	9.94036e-07	6.55072	UP	0.790385	1.6678	-1.58516	0.899604	-1.67742	-1.2376	-1.55063	-1.52546	-1.67249	-1.74038	-1.30103	-1.11174	-1.57285	-1.64433	-1.4164	-1.62845	-1.13091	-1.02947	-1.68431	-1.66996	-1.35138	5.20735	-0.792648	-1.55614	-0.862626	-1.02774	3.82644	-0.366604	-1.48952	-0.895687	-1.59003	-0.299681	-1.64229	-1.40019	-0.251341	-1.68781	-1.47576	-1.5912	-0.878027	-1.39765	-1.4982	-1.2248
hsa-miR-585-5p	1.94065	2.77708	4.35604	3.43977e-05	0.000132877	1.3842	UP	4.34136	0.417297	3.73622	-1.57134	2.44188	-1.2376	-1.55063	3.17799	4.7043	4.7713	-1.30103	-1.11174	2.42159	-1.64433	-1.4164	-1.62845	5.32587	3.29504	0.173187	6.7117	4.88949	4.06599	-0.792648	2.59977	4.80516	-1.02774	-1.50421	1.93035	-1.48952	4.32125	4.69265	-0.299681	5.02788	-1.40019	-1.72575	0.56533	2.70529	1.40256	-0.878027	3.97823	4.78048	4.46007
hsa-miR-586	-2.38629	0.79927	-5.1725	1.34517e-06	6.77868e-06	4.51631	DOWN	0.211797	2.32246	2.36484	-1.57134	3.14779	5.3172	4.94553	3.64467	2.09735	4.16545	-1.30103	4.63807	1.91809	3.79351	5.21668	-1.62845	-1.13091	5.01963	3.74231	0.983374	-1.35138	3.18799	-0.792648	-1.55614	3.99123	4.81346	3.7888	2.32055	3.67391	-0.895687	4.66785	-0.299681	-1.64229	6.32925	0.467604	-1.27749	2.13149	5.5196	4.05682	4.1634	-1.4982	-1.2248
hsa-miR-587	-1.87398	0.0308925	-4.54467	1.67085e-05	6.84621e-05	2.07847	DOWN	3.41444	4.40391	-1.58516	-1.57134	-1.67742	5.03182	4.74147	2.19831	2.84316	-1.74038	-1.30103	3.77377	-1.57285	1.66168	4.08657	0.574709	-1.13091	-1.02947	2.03784	3.30357	-1.35138	-1.04535	-0.792648	-1.55614	-0.862626	-1.02774	3.66754	4.65402	3.55346	-0.895687	2.5269	-0.299681	-1.64229	5.64678	2.14851	1.17199	-1.47576	5.76473	-0.878027	3.71875	-1.4982	-1.2248
hsa-miR-588	-1.19104	-0.516239	-3.7123	0.000351841	0.00109126	-0.832412	DOWN	1.52912	1.04963	-1.58516	2.42159	-1.67742	-1.2376	1.29235	3.91634	2.85534	-1.74038	3.36582	-1.11174	1.43631	2.41758	2.21975	-1.62845	-1.13091	-1.02947	-0.629044	-1.66996	-1.35138	-1.04535	-0.792648	-1.55614	-0.862626	-1.02774	3.63522	-1.64695	3.17799	-0.895687	1.62288	-0.299681	0.0398187	-1.40019	2.48587	2.86909	-1.47576	4.29757	-0.878027	-1.39765	-1.4982	-1.2248
hsa-miR-589-3p	-1.00682	1.54666	-2.28851	0.0244	0.0449612	-4.7286	DOWN	2.69035	-1.61738	4.141	1.73879	3.44726	-1.2376	5.5196	1.4187	-1.67249	1.62097	4.41566	3.83049	2.57271	1.80034	4.00323	-1.62845	-1.13091	-1.02947	4.59131	3.76695	-1.35138	3.11787	-0.792648	0.977846	-0.862626	4.30164	1.46197	0.507143	5.00664	-0.895687	3.92504	-0.299681	4.10071	5.22174	2.79957	4.48286	2.25037	0.430132	5.3218	4.95114	-1.4982	5.00178
hsa-miR-590-5p	-1.5276	-0.321677	-3.90681	0.000178487	0.000596895	-0.18898	DOWN	-1.61576	0.290654	4.43565	2.90998	3.0089	-1.2376	2.7853	2.79957	-1.67249	4.82203	-1.30103	-1.11174	-1.57285	-1.64433	-1.4164	-1.62845	4.25675	-1.02947	-0.79756	3.08953	2.28507	-1.04535	-0.792648	-1.55614	-0.862626	-1.02774	2.19471	-1.64695	-1.48952	-0.895687	3.93115	-0.299681	-0.552742	5.69012	-0.173901	3.14271	-1.47576	-1.5912	-0.878027	-1.39765	-1.4982	-1.2248
hsa-miR-591	1.13776	0.151114	2.85264	0.00535566	0.0121461	-3.36868	UP	0.19322	3.83486	-1.58516	4.94142	-1.67742	-1.2376	-1.55063	-1.52546	-1.67249	-1.42904	2.40924	-1.11174	-1.57285	5.65827	1.67667	2.87253	-1.13091	-1.02947	1.29599	0.00904396	1.93035	-1.04535	-0.792648	-1.55614	-0.862626	-1.02774	-1.50421	-1.64695	-1.48952	-0.895687	0.384198	-0.299681	-1.64229	4.05682	-0.487692	-1.68781	-1.47576	-1.5912	-0.878027	-1.39765	-1.4982	-1.2248
hsa-miR-592	-1.97638	-0.223435	-5.50912	3.26395e-07	1.8646e-06	5.89475	DOWN	-1.25088	2.0843	2.74065	-1.57134	1.71777	3.47727	2.53707	-1.52546	1.32473	0.752593	-1.30103	-1.11174	2.53707	0.246505	-1.4164	-1.62845	-1.13091	5.3624	-1.12565	4.95114	-1.35138	4.51246	-0.792648	-1.55614	-0.862626	2.83188	1.525	0.674571	1.88351	-0.895687	-1.59003	-0.299681	2.44946	-1.40019	-0.64489	3.25203	-1.47576	0.652945	3.69363	5.0237	3.72769	2.95704
hsa-miR-593-3p	1.71703	0.00918476	5.11591	1.6996e-06	8.37599e-06	4.28916	UP	-1.67178	-1.61738	-1.58516	-1.57134	-0.938643	2.46123	-1.55063	4.00169	-1.67249	1.18685	-1.30103	-1.11174	-1.57285	-1.64433	-1.4164	-1.62845	-1.13091	-1.02947	-1.68431	1.1578	-1.35138	-1.04535	-0.792648	3.14271	-0.862626	-1.02774	-1.50421	-1.64695	-1.48952	-0.895687	1.94586	-0.299681	-1.64229	-1.40019	0.63728	-0.709725	-1.47576	-1.5912	-0.878027	-1.39765	-1.4982	-1.2248
hsa-miR-593-5p	-1.32991	2.66187	-3.1033	0.00254313	0.00637901	-2.68405	DOWN	3.9181	4.80516	4.11216	4.01081	4.32321	4.68245	2.36133	3.08538	3.47727	3.79351	5.3218	5.23505	4.81749	1.96377	4.04535	4.96342	-1.13091	4.43787	4.9768	5.31518	-1.35138	-1.04535	-0.792648	4.42716	4.26109	-1.02774	4.89462	4.91689	3.93931	-0.895687	4.04535	-0.299681	4.63807	3.63779	0.568368	5.08338	2.06629	4.7991	4.89462	5.22174	4.79703	3.76695
hsa-miR-595	1.46736	1.37909	3.12491	0.0023803	0.00605102	-2.62283	UP	3.25203	3.92099	-1.58516	-1.57134	-1.67742	-1.2376	4.09587	-1.52546	-0.952868	4.32516	4.14305	-1.11174	-1.57285	2.20617	-1.4164	0.639451	-1.13091	-1.02947	3.37599	5.66429	3.64677	2.87597	-0.792648	-1.55614	-0.862626	-1.02774	-1.50421	-1.64695	-1.48952	-0.895687	4.53865	-0.299681	5.4264	1.83481	1.50826	-1.00624	-1.47576	-1.5912	3.83907	-1.39765	-1.4982	-1.2248
hsa-miR-598-5p	-1.00298	2.55648	-2.25395	0.0265758	0.048414	-4.80336	DOWN	4.35479	3.61108	5.22546	4.57938	3.71705	3.3259	5.60429	4.07065	3.96285	-1.06204	3.0674	4.06599	-1.57285	5.12796	5.60716	-0.114846	2.56184	5.54723	4.7208	2.35893	4.93041	-1.04535	-0.792648	-1.55614	3.48763	6.0153	4.78996	5.54441	4.13491	-0.895687	0.356879	-0.299681	4.36964	4.90063	4.31731	4.88753	5.4162	6.09126	-0.878027	3.92504	-1.4982	-1.2248
hsa-miR-600	-1.02663	-0.509347	-3.14388	0.00224536	0.00573069	-2.56877	DOWN	0.8875	2.59251	-1.58516	1.40859	-1.67742	4.22813	-1.55063	-1.52546	0.920505	-1.74038	-1.30103	-1.11174	3.10451	-1.64433	1.87667	2.5269	-1.13091	-1.02947	2.67031	-0.0328077	3.52029	-1.04535	-0.792648	2.09145	-0.862626	-1.02774	-1.50421	2.43436	-1.48952	-0.895687	-1.59003	-0.299681	3.2034	-1.40019	0.858297	0.774725	-1.47576	-1.5912	-0.878027	2.59977	1.29235	-1.2248
hsa-miR-601	-1.16886	0.0730404	-2.92046	0.00439659	0.010252	-3.18814	DOWN	0.783154	1.53295	-1.58516	-1.57134	-1.14307	-1.2376	0.895473	2.29001	-1.67249	-0.0638791	-1.30103	-1.11174	3.54579	-0.533978	2.32246	1.57569	-1.13091	-1.02947	2.5316	1.12188	-1.35138	-1.04535	-0.792648	3.56602	-0.862626	4.64236	2.95949	3.48321	4.50348	-0.895687	-1.59003	-0.299681	-1.64229	5.84262	-1.47298	-0.782654	-1.47576	4.34893	-0.878027	3.49786	-1.4982	-1.2248
hsa-miR-602	2.25291	5.09222	5.8169	8.63802e-08	5.35182e-07	7.19276	UP	5.04095	5.46637	5.66429	-1.57134	5.68357	-1.2376	5.38632	4.80516	3.7972	4.7208	5.24823	7.44288	5.50931	5.62254	4.68036	4.2996	5.65526	5.89963	4.79222	0.93522	-1.35138	5.34389	5.38104	5.66429	-0.862626	5.62874	4.7694	5.08518	5.54159	-0.895687	5.29882	-0.299681	5.3172	6.5203	4.83567	5.72466	5.02788	6.30065	3.42758	5.11943	3.71535	-1.2248
hsa-miR-6071	2.82127	0.621894	7.485	4.20132e-11	4.5279e-10	14.691	UP	-1.38601	1.77833	3.99358	-1.57134	-1.67742	-1.2376	3.13454	-1.52546	-1.67249	-1.08298	-1.30103	3.24132	1.4187	-0.0513407	-1.4164	-1.62845	-1.13091	-1.02947	-1.68431	-1.66996	2.11879	-1.04535	-0.792648	1.73626	-0.862626	-1.02774	2.49177	-1.64695	-1.48952	-0.895687	-1.59003	-0.299681	-1.64229	-1.40019	-1.72575	-1.68781	-1.47576	2.09896	-0.878027	-1.39765	-1.4982	-1.2248
hsa-miR-6072	1.82042	0.105029	4.73482	7.93302e-06	3.44885e-05	2.79696	UP	-1.68299	-1.61738	3.72325	3.72769	-1.67742	-1.2376	-1.55063	-1.52546	-1.67249	0.858297	-1.30103	-1.11174	-1.57285	-1.64433	-1.4164	-1.62845	-1.13091	-1.02947	-1.68431	-1.66996	6.11895	-1.04535	-0.792648	1.77188	-0.862626	-1.02774	-1.50421	-1.64695	-1.48952	-0.895687	-1.59003	-0.299681	-1.64229	2.54823	2.6184	-1.68781	-1.47576	-1.5912	-0.878027	-1.39765	-1.4982	-1.2248
hsa-miR-6073	-3.85094	2.92322	-8.03054	3.12904e-12	3.73301e-11	17.2563	DOWN	6.10435	5.03182	6.38911	5.19348	6.25937	5.19915	5.05182	5.39673	6.2739	6.63545	4.87499	7.05858	6.7822	7.66471	6.0373	5.59536	5.85651	5.16414	4.33309	2.48882	6.14173	-1.04535	3.56125	2.07226	-0.862626	-1.02774	4.54649	6.63545	3.56364	-0.895687	5.61329	-0.299681	0.00376923	5.77132	4.80516	3.91095	6.0153	3.69363	5.48179	6.02186	6.30065	5.28078
hsa-miR-6077	1.93809	1.33873	4.27913	4.59393e-05	0.000172272	1.10668	UP	1.17199	-1.61738	-1.58516	-1.57134	0.0827912	-1.2376	-1.55063	4.11515	-0.789253	3.76695	5.24823	3.67199	1.46698	-1.64433	-1.4164	-1.62845	3.75529	-1.02947	-1.68431	5.33051	1.96377	-1.04535	-0.792648	4.34136	-0.862626	3.38725	-1.50421	-1.64695	2.73627	-0.895687	-1.59003	4.98336	2.10562	-1.40019	2.81063	1.55674	2.46643	-1.5912	-0.878027	-1.39765	-1.4982	-1.2248
hsa-miR-608	1.32567	1.0748	3.00693	0.00340318	0.00821181	-2.95286	UP	-1.68781	-1.61738	-1.58516	3.66092	1.42591	-1.2376	1.62288	-1.52546	-1.67249	5.12796	-1.30103	-1.11174	-1.57285	-1.64433	2.08243	0.845703	-1.13091	-1.02947	-1.19271	5.09192	2.74065	3.94568	-0.792648	1.48495	-0.862626	3.19902	-1.50421	-1.64695	3.91457	4.7208	4.48696	-0.299681	0.799462	1.66545	-1.20904	4.15327	-1.47576	-1.5912	-0.878027	2.95459	-1.4982	-1.2248
hsa-miR-6081	1.21726	2.91252	3.02492	0.00322459	0.00784732	-2.90322	UP	5.046	4.19962	4.33711	5.03631	5.28078	-1.2376	-1.55063	2.97604	3.04401	3.94143	-1.30103	3.93115	-1.57285	3.73399	2.4051	2.63286	-1.13091	-1.02947	-1.68431	2.56656	2.7853	-1.04535	-0.792648	4.68036	-0.862626	-1.02774	4.44252	4.85024	2.54218	-0.895687	4.95574	5.89443	4.9768	3.86581	4.32888	3.53471	3.05152	-1.5912	-0.878027	2.06629	3.89673	3.54315
hsa-miR-6083	1.02542	1.46614	2.27237	0.0253956	0.0466282	-4.76363	UP	-0.30522	-1.61738	4.69038	4.02351	3.8232	-1.2376	-1.55063	2.99975	3.83907	4.03693	3.50184	-1.11174	-1.57285	-1.64433	-1.4164	1.88575	2.77787	-1.02947	4.11905	-1.66996	-1.35138	-1.04535	3.78465	-1.55614	4.864	-1.02774	1.21649	1.16557	2.32436	4.7043	-1.59003	-0.299681	-1.64229	3.00416	1.40256	1.13625	-1.47576	-1.5912	-0.878027	-1.39765	1.68293	-1.2248
hsa-miR-6084	1.23859	0.764018	2.6503	0.00946929	0.0198762	-3.88604	UP	4.13693	-1.61738	0.378418	-1.57134	-1.67742	-1.2376	-1.55063	2.26749	4.3351	3.79915	3.30163	-1.11174	-1.57285	-1.64433	-1.4164	-0.0360659	-1.13091	-1.02947	-1.68431	-1.66996	3.74654	-1.04535	-0.792648	-1.55614	-0.862626	-1.02774	-1.50421	-1.64695	-1.48952	4.33711	3.04167	-0.299681	-1.64229	-1.40019	2.50096	0.895473	-1.47576	-1.5912	-0.878027	-1.39765	-1.4982	-1.2248
hsa-miR-611	-1.51439	0.283143	-3.79174	0.000267368	0.000849814	-0.572522	DOWN	0.420159	0.224857	2.63286	3.59038	4.1634	-1.2376	-1.55063	2.07667	2.3339	1.84452	-1.30103	-1.11174	-1.57285	-1.64433	4.20836	4.27324	3.75529	-1.02947	1.86618	5.93112	3.97343	-1.04535	-0.792648	3.40886	3.63265	-1.02774	-1.50421	-1.64695	-1.48952	-0.895687	4.75389	-0.299681	-0.0552527	-1.40019	4.02768	-1.68781	-1.47576	-1.5912	-0.878027	2.48587	2.51445	2.88124
hsa-miR-612	1.66773	2.96064	4.1288	8.01741e-05	0.000284829	0.573761	UP	4.58526	3.01742	1.06785	3.45734	5.89963	4.32125	-1.55063	1.85033	3.18133	4.44252	-1.30103	-1.11174	4.13895	4.53457	-1.4164	4.84196	3.74453	4.87295	0.0327582	5.37645	-1.35138	4.2481	-0.792648	3.94568	-0.862626	4.91247	2.38257	2.90536	2.41395	5.07468	4.34699	-0.299681	2.58203	-1.40019	-0.456209	-1.02147	3.56602	1.43809	4.23237	3.03425	3.70231	-1.2248
hsa-miR-6124	1.33005	6.98498	7.93739	4.88601e-12	5.64533e-11	16.8158	UP	6.38911	6.84495	6.29226	6.07618	6.53796	5.54159	2.31082	6.43845	5.34827	7.36533	6.61129	6.98067	6.76149	6.62673	6.19291	5.94475	6.84495	5.47725	6.08343	4.864	6.35714	7.89342	6.79257	7.17757	8.15984	6.0678	6.36559	6.21729	7.02346	6.62673	6.79257	6.79257	7.52593	7.15402	7.26191	5.71123	6.65519	4.68454	4.79703	5.2941	7.10702	7.1314
hsa-miR-6127	3.54226	3.17223	8.62618	1.7824e-13	2.72135e-12	20.0907	UP	3.66501	3.18799	-1.58516	1.46698	-0.567423	-1.2376	-1.55063	-1.52546	-0.417253	0.336126	-1.30103	-1.11174	2.50442	3.09825	4.07912	-1.62845	4.31731	-1.02947	5.37875	2.99057	-1.35138	4.33711	4.25455	1.57569	-0.862626	-1.02774	2.45353	2.68346	4.41566	5.11516	-1.59003	-0.299681	4.57232	-1.40019	2.22803	3.92504	2.46123	-1.5912	-0.878027	4.11515	4.37156	-1.2248
hsa-miR-6129	1.10401	-0.325219	3.24228	0.00165289	0.00435284	-2.28434	UP	1.90942	-1.61738	-1.58516	3.41444	0.808703	-1.2376	-1.55063	-1.52546	-1.67249	-1.74038	-1.30103	-1.11174	-1.57285	-1.64433	-1.4164	-1.62845	-1.13091	-1.02947	-1.68431	2.15948	-1.35138	-1.04535	-0.792648	-1.55614	-0.862626	-1.02774	-1.50421	-1.64695	-1.48952	-0.895687	-1.59003	-0.299681	-1.64229	-1.40019	-1.72575	3.33397	-1.47576	-1.5912	-0.878027	-1.39765	-1.4982	-1.2248
hsa-miR-6131	-5.60722	9.72325	-19.987	3.2012e-35	1.64222e-32	69.6759	DOWN	12.3666	10.7023	11.7069	11.4032	12.6001	13.0478	12.0097	12.4915	13.5022	12.4915	11.2585	12.3117	13.2735	13.1133	11.8963	12.251	11.3067	11.0816	12.251	13.3402	12.4294	12.3117	12.8487	12.4915	11.4553	11.4553	12.055	13.6352	12.3117	12.145	12.6586	9.92015	12.3117	12.6586	11.7688	11.2075	12.2004	12.8936	12.8936	13.1133	13.0478	12.251
hsa-miR-6133	4.13098	0.755822	13.6344	8.48064e-24	6.3979e-22	43.6672	UP	4.52151	-1.61738	1.99477	-1.57134	-0.965341	-1.2376	-1.55063	1.03745	-1.67249	-1.74038	-1.30103	-1.11174	-1.57285	-1.64433	-1.4164	-1.62845	-1.13091	-1.02947	0.250549	-1.66996	-1.35138	-1.04535	-0.792648	-1.55614	-0.862626	-1.02774	-1.50421	-1.64695	-1.48952	-0.895687	-1.59003	-0.299681	-1.64229	-1.40019	-1.52767	-1.68781	-1.47576	-1.5912	-0.878027	-1.39765	-1.4982	-1.2248
hsa-miR-6134	1.06226	-0.331103	2.87952	0.00495468	0.0113776	-3.29756	UP	-1.41054	2.23589	-1.58516	-1.57134	-1.67742	-1.2376	-1.55063	3.92302	-1.67249	-1.50348	-1.30103	-1.11174	-1.57285	-1.64433	-1.4164	-1.62845	2.79251	-1.02947	-1.68431	-1.66996	-1.35138	-1.04535	-0.792648	-1.55614	-0.862626	-1.02774	-1.50421	-1.64695	4.02768	-0.895687	0.448088	-0.299681	-1.64229	-1.40019	-1.72575	-1.68781	-1.47576	1.90942	-0.878027	-1.39765	-1.4982	-1.2248
hsa-miR-614	-2.94097	9.20854	-18.7296	3.91701e-33	9.13375e-31	64.9392	DOWN	10.124	9.56193	10.5571	11.1223	10.3314	11.4032	11.1223	10.9305	11.4032	11.0266	10.2934	9.44082	10.8158	11.4553	10.852	11.5659	10.419	10.124	11.1223	10.6687	9.96364	10.5228	10.1715	9.92015	9.45357	10.8158	11.3067	11.2585	11.7069	10.5228	9.96364	10.2119	9.7082	9.64725	9.96364	10.6687	10.2119	11.1223	10.7023	11.2075	10.9764	11.4032
hsa-miR-615-3p	2.03338	2.43488	4.71592	8.54895e-06	3.69159e-05	2.72474	UP	4.71859	0.787945	-1.58516	3.22432	3.54579	4.14745	-1.55063	-1.52546	5.13188	2.27046	-1.30103	-1.11174	4.47121	1.61565	3.63522	-1.62845	2.98621	3.74231	5.2304	4.67824	2.07226	4.56165	-0.792648	4.6246	4.78213	-1.02774	-1.50421	-1.64695	-1.48952	-0.895687	1.69945	-0.299681	5.62874	-1.40019	3.94973	3.15233	3.04634	-1.5912	-0.878027	-1.39765	-1.4982	-1.2248
hsa-miR-617	-1.7265	-0.0426267	-4.01696	0.00012039	0.000415055	0.185813	DOWN	-1.3699	-1.61738	-1.58516	0.538093	-1.67742	3.49786	-1.55063	-1.52546	2.63037	-1.74038	-1.30103	-1.11174	-1.57285	0.772418	2.81063	-1.62845	-1.13091	3.44002	3.721	0.525676	3.7888	-1.04535	-0.792648	1.47338	-0.862626	2.95053	2.89039	4.9073	3.86085	-0.895687	4.13693	-0.299681	3.32137	6.0153	3.28046	-0.337764	-1.47576	5.03631	-0.878027	4.69587	-1.4982	-1.2248
hsa-miR-619-3p	-1.32596	-0.282951	-3.44225	0.00087015	0.00246623	-1.68506	DOWN	1.00652	0.0142747	-1.58516	2.61026	1.2017	-1.2376	3.90835	-1.52546	-1.67249	-1.74038	-1.30103	3.41639	5.45567	0.322352	-1.4164	-1.62845	4.93536	-1.02947	1.06078	-1.66996	-1.35138	-1.04535	-0.792648	3.28353	-0.862626	5.18959	3.66754	-1.64695	-1.48952	-0.895687	2.25984	-0.299681	-0.15044	1.79342	4.22029	-1.68781	-1.47576	0.475736	-0.878027	2.66055	-1.4982	-1.2248
hsa-miR-628-5p	-1.45307	-0.543974	-3.9392	0.000159078	0.00053689	-0.0795169	DOWN	1.10654	-1.61738	-1.58516	-1.57134	-1.67742	3.40886	3.93115	-1.52546	-1.67249	-1.74038	-1.30103	3.9372	-1.57285	-1.64433	-1.4164	-1.62845	-1.13091	-1.02947	3.91634	2.15146	-1.35138	-1.04535	-0.792648	-1.55614	-0.862626	4.58954	3.38938	3.38007	1.51622	-0.895687	3.33179	-0.299681	-1.64229	1.87164	-1.72575	0.423022	2.45353	5.26909	-0.878027	-1.39765	-1.4982	-1.2248
hsa-miR-629-3p	2.54333	1.6003	6.97887	4.5145e-10	4.19554e-09	12.3502	UP	-1.03133	3.92504	-1.58516	-1.57134	-1.67742	-1.2376	-1.55063	-1.52546	3.02508	-1.44237	-1.30103	3.28353	0.962956	2.83188	-1.4164	2.56184	-1.13091	-1.02947	-1.68431	-0.946516	-1.35138	-1.04535	-0.792648	3.71288	-0.862626	-1.02774	1.9051	-0.301363	3.57491	-0.895687	0.880984	-0.299681	4.3432	-1.40019	-1.42822	3.04401	5.3942	0.71633	-0.878027	-1.39765	2.6121	-1.2248
hsa-miR-629-5p	-1.67289	0.383425	-3.55282	0.000603792	0.00177403	-1.34183	DOWN	4.57736	1.76451	-1.58516	4.07065	1.95998	4.1973	3.40886	-1.52546	-1.67249	-1.74038	-1.30103	2.98839	-1.57285	-1.64433	4.09587	3.8011	-1.13091	-1.02947	4.9814	-0.292407	-1.35138	3.05803	-0.792648	-1.55614	-0.862626	-1.02774	1.2017	0.858297	9.56193	-0.895687	2.58203	-0.299681	0.224857	-1.40019	2.02826	2.49177	-1.47576	5.4611	4.27735	-1.39765	-1.4982	-1.2248
hsa-miR-632	1.44005	1.30803	3.25129	0.00160663	0.00425599	-2.25793	UP	-1.62914	4.22231	2.24268	4.13119	2.2171	-1.2376	2.3339	-1.52546	3.92504	1.1039	-1.30103	-1.11174	-1.57285	2.15146	-1.4164	4.54232	-1.13091	-1.02947	-1.68431	-1.66996	-1.35138	-1.04535	-0.792648	0.780802	-0.862626	4.22029	-1.50421	4.0404	1.68056	-0.895687	3.74856	-0.299681	1.10654	5.08698	1.59796	4.22029	2.48044	3.71535	3.80931	-1.39765	-1.4982	-1.2248
hsa-miR-633	-1.31156	-0.369832	-3.39482	0.00101549	0.00285234	-1.82973	DOWN	-0.529462	-1.61738	2.94191	-1.57134	1.47624	4.35658	-1.55063	1.75144	-1.67249	-1.74038	-1.30103	-1.11174	1.42591	-1.64433	1.79538	2.85534	-1.13091	-1.02947	-1.68431	-1.66996	-1.35138	4.26321	-0.792648	-1.55614	4.32516	5.48835	2.97371	-0.565374	-1.48952	-0.895687	3.49529	-0.299681	1.48918	2.05274	-1.72575	-0.107659	-1.47576	2.0183	5.56173	-1.39765	-1.4982	-1.2248
hsa-miR-634	1.49734	3.13958	4.02407	0.000117342	0.000405638	0.210253	UP	4.03693	4.32702	2.06435	4.62931	2.63763	3.12984	1.07935	5.14538	-0.647423	4.80959	4.30556	2.79957	0.68022	4.23631	3.94568	4.56421	4.80317	-1.02947	4.21021	0.695846	4.07673	-1.04535	-0.792648	1.90942	-0.862626	4.78996	4.49475	3.84709	-1.48952	-0.895687	5.35273	-0.299681	2.41758	5.37645	3.51322	3.2886	3.33179	4.08657	4.40606	4.04895	-1.4982	-1.2248
hsa-miR-635	1.05234	0.541138	2.39675	0.0185655	0.0356709	-4.48788	UP	-1.59531	-1.61738	2.59251	-1.57134	-1.67742	-1.2376	3.99358	2.73163	-1.67249	1.68531	-1.30103	-1.11174	-1.57285	-0.360516	-1.4164	-1.62845	-1.13091	-1.02947	-1.68431	-1.66996	-1.35138	-1.04535	5.10032	-1.55614	-0.862626	-1.02774	3.50847	1.51813	-1.48952	-1.74852	0.475736	-0.299681	-1.64229	-1.40019	3.312	2.90998	-1.47576	-1.5912	-0.878027	-1.39765	3.69363	-1.2248
hsa-miR-637	1.26075	4.51222	4.20587	6.03496e-05	0.000217411	0.84538	UP	4.73484	3.90575	4.81749	-1.57134	4.95574	5.33051	3.39695	3.77166	4.85218	5.2442	5.11037	5.85299	5.72135	5.16414	4.13119	4.7208	5.33938	5.12412	3.74231	6.40753	4.69587	5.2941	-0.792648	4.20836	5.23505	5.01963	4.67213	3.44482	1.33604	3.11787	4.34136	-0.299681	3.99123	5.21668	4.81749	4.21205	4.24392	2.27919	-0.878027	2.76771	3.5252	3.91095
hsa-miR-642a-5p	2.74044	2.5596	7.02429	3.65431e-10	3.44607e-09	12.5584	UP	4.42279	4.64236	1.97449	1.86419	3.7401	3.73399	0.903571	3.5252	-1.67249	-1.39668	-1.30103	6.17014	2.05964	-1.64433	-1.4164	2.51445	-1.13091	-1.02947	0.145632	3.12784	5.33715	2.91423	-0.792648	2.75909	4.46897	3.93931	2.04532	0.983374	-1.48952	-0.895687	-1.59003	-0.299681	5.66429	-1.40019	4.33924	-1.68781	-1.47576	2.3882	-0.878027	-1.39765	1.28407	2.29651
hsa-miR-642b-3p	-1.04624	9.3966	-7.33471	8.53831e-11	8.76031e-10	13.9914	DOWN	9.25742	9.05529	10.7779	9.45357	8.73948	9.56193	10.4861	10.0013	9.84619	11.2075	10.4861	10.7434	10.9305	11.1223	10.2934	9.88389	10.1715	9.7082	9.42808	9.05529	9.92015	9.35637	8.5477	8.64662	10.8929	8.46324	9.96364	10.3314	9.53385	9.62142	9.33621	10.3533	10.8158	10.0864	9.45357	9.81192	10.7023	9.88389	10.2934	10.0013	9.84619	10.5955
hsa-miR-642b-5p	3.88528	1.49008	12.6135	9.21002e-22	4.54302e-20	39.0162	UP	-0.835626	2.52165	-1.58516	2.58603	-0.886055	-1.2376	-1.55063	-1.52546	0.510319	1.54078	-1.30103	-1.11174	-1.57285	-1.64433	-1.4164	-1.62845	-1.13091	-1.02947	-1.68431	3.97343	-1.35138	4.80959	-0.792648	-1.55614	-0.862626	-1.02774	2.22623	-1.64695	-1.48952	-0.895687	-1.59003	-0.299681	-0.160604	3.4523	3.08335	-0.427714	1.64879	-1.5912	-0.878027	-1.39765	-1.4982	-1.2248
hsa-miR-643	-1.03272	0.431266	-2.22164	0.0287628	0.0518094	-4.87234	DOWN	0.318516	2.14205	-1.58516	5.56173	1.59397	3.63265	3.94143	4.27324	4.95574	-1.74038	-1.30103	-1.11174	3.53229	0.960879	-1.4164	0.287703	-1.13091	-1.02947	-1.68431	-1.66996	-1.35138	3.5252	-0.792648	2.23589	4.19143	-1.02774	-1.50421	3.50184	2.37869	3.58552	4.44907	-0.299681	4.4536	-1.40019	-1.17585	2.32055	-1.47576	1.23001	-0.878027	-1.39765	-1.4982	-1.2248
hsa-miR-647	-1.14178	0.991913	-2.30646	0.0233324	0.0432737	-4.68935	DOWN	1.86618	-1.61738	1.01007	-1.57134	4.25235	3.96655	1.60513	-1.52546	1.37555	-1.52934	-1.30103	3.07924	-1.57285	-1.64433	4.82623	3.64018	-1.13091	4.95114	3.63265	0.833198	3.76695	-1.04535	3.69088	3.07019	-0.862626	4.09587	-1.50421	1.59596	4.01081	-0.895687	-1.59003	-0.299681	2.3882	4.85873	2.11252	-1.68781	-1.47576	5.19915	3.70569	5.03631	2.92525	5.4112
hsa-miR-648	-1.56966	0.956322	-3.67756	0.000396277	0.00121181	-0.94481	DOWN	3.10025	4.16545	5.59536	2.29909	4.2933	4.00323	2.43171	3.49985	-1.67249	3.10982	4.01286	-1.11174	-1.57285	4.36748	3.49273	3.2034	-1.13091	-1.02947	3.34831	1.80034	4.13693	-1.04535	-0.792648	-1.55614	-0.862626	2.95459	3.42256	4.12252	5.32587	-0.895687	0.390121	-0.299681	0.995791	-1.40019	2.05026	-1.68781	1.97984	3.81834	-0.878027	3.42758	1.45715	2.77787
hsa-miR-6499-3p	1.3694	0.811237	3.08374	0.00269938	0.00672877	-2.73917	UP	-1.74038	4.10071	1.9051	2.56656	-1.67742	-1.2376	-1.55063	-1.52546	-1.67249	2.70529	3.18799	-1.11174	-1.57285	-1.64433	2.06629	-1.62845	-1.13091	3.07299	-1.68431	-1.66996	4.37959	-1.04535	4.86852	-1.55614	5.0237	-1.02774	1.65227	-1.64695	-1.48952	-0.895687	0.71633	-0.299681	-1.64229	3.29504	-1.72575	1.76612	2.08978	-1.5912	-0.878027	1.72	-1.4982	-1.2248
hsa-miR-6499-5p	1.36989	1.54333	3.11366	0.00246377	0.00619731	-2.65472	UP	2.14055	0.68022	-1.58516	1.44651	3.90575	-1.2376	-1.55063	4.26321	-1.67249	4.69786	-1.30103	-1.11174	0.743418	-1.64433	-1.4164	0.752593	-1.13091	-1.02947	-0.779989	-1.66996	4.53081	-1.04535	3.66501	-1.55614	5.12796	-1.02774	3.59038	0.764319	2.22623	-0.895687	4.80516	-0.299681	-1.64229	-1.40019	3.22136	-0.674923	3.65096	1.9051	-0.878027	-1.39765	-1.4982	-1.2248
hsa-miR-650	-2.27281	4.35905	-7.38705	6.67223e-11	6.98541e-10	14.2347	DOWN	5.87464	5.55147	6.48286	6.02871	5.83114	6.95922	6.66565	6.67492	5.07916	5.84262	6.07199	6.00901	5.79335	6.73395	6.2739	6.43845	6.21729	5.76473	6.14909	4.30164	4.42027	-1.04535	5.67738	3.65873	4.63338	6.57651	6.3076	5.10032	6.00901	5.12412	5.26281	-0.299681	3.24391	4.49922	5.34389	6.51142	5.33938	6.11156	6.20973	6.34908	5.75765	5.38632
hsa-miR-6501-3p	-4.03369	3.40278	-10.9538	2.33696e-18	6.66034e-17	31.2364	DOWN	5.82121	5.18959	5.35273	6.21351	5.64678	6.16264	5.47125	5.75765	5.47952	6.21729	6.28467	5.32819	7.07141	5.61329	5.39167	6.44729	6.33999	6.28847	4.71637	1.67667	5.62874	3.12209	3.76695	5.60142	-0.862626	6.53796	5.53677	5.22546	4.54232	4.28593	4.69587	6.22513	4.55407	4.62931	5.74471	5.40663	6.11156	4.4536	5.93112	5.68357	6.22899	5.8104
hsa-miR-6501-5p	2.95744	2.65949	6.4257	5.73456e-09	4.37772e-08	9.85058	UP	4.61865	2.80429	4.01491	0.737923	3.58552	-1.2376	-1.55063	1.48918	1.35236	3.69363	3.72973	-1.11174	0.645945	1.55909	-1.4164	3.7888	3.7693	3.721	3.20121	1.03246	3.86581	-1.04535	-0.792648	4.15952	-0.862626	-1.02774	2.01438	1.67862	-1.48952	5.16924	-1.59003	5.98767	0.250549	-1.40019	3.26026	3.67607	3.27386	-1.5912	-0.878027	-1.39765	3.75333	-1.2248
hsa-miR-6503-5p	1.10505	0.269644	2.4906	0.0145487	0.0290861	-4.27127	UP	3.70569	-1.61738	3.59531	-1.57134	-1.67742	-1.2376	-1.55063	-1.52546	4.62931	-1.03575	-1.30103	-1.11174	-1.57285	-1.64433	2.98839	2.52165	-1.13091	-1.02947	1.35951	-1.66996	3.20121	-1.04535	-0.792648	-1.55614	-0.862626	-1.02774	-1.50421	-1.64695	-1.48952	3.55618	0.827879	-0.299681	4.34893	-1.40019	0.0632637	-1.68781	-1.47576	-1.5912	-0.878027	-1.39765	-1.4982	-1.2248
hsa-miR-6504-5p	1.09989	0.368341	2.65891	0.00924778	0.019507	-3.86469	UP	1.14784	-1.61738	-1.58516	-1.57134	-1.67742	-1.2376	-1.55063	1.23001	1.13625	2.13904	-1.30103	-1.11174	-1.57285	-0.466538	2.03784	-1.62845	-1.13091	-1.02947	4.90063	3.65654	2.42502	-1.04535	-0.792648	-1.55614	-0.862626	-1.02774	-1.50421	-1.64695	-1.48952	-0.895687	-1.59003	-0.299681	-1.64229	3.47445	-0.634209	-1.68781	1.47624	5.86836	-0.878027	3.09825	-1.4982	-1.2248
hsa-miR-6507-5p	-1.1718	1.21285	-2.55603	0.0122282	0.0248734	-4.11594	DOWN	0.849456	-1.61738	1.3909	3.45734	2.71973	3.43766	-1.55063	1.19009	2.46123	3.09825	3.24132	-1.11174	0.950385	5.43067	4.1756	1.4187	3.9271	3.92915	-1.09655	5.43558	4.5506	5.4137	-0.792648	2.56656	-0.862626	4.47863	5.06815	3.25203	1.89073	-0.895687	2.47623	5.47125	3.9271	-1.40019	1.68056	-1.68781	3.98303	-1.5912	-0.878027	4.03008	-1.4982	-1.2248
hsa-miR-6508-5p	1.9832	2.02565	5.09156	1.87881e-06	9.21443e-06	4.19184	UP	1.51154	4.10651	1.33274	-1.57134	1.69945	-1.2376	-1.55063	-1.52546	1.49877	0.048956	-1.30103	-1.11174	4.52388	3.96456	-1.4164	1.78054	4.54232	-1.02947	3.54826	2.39173	-1.35138	-1.04535	4.18352	3.44726	-0.862626	-1.02774	-1.50421	3.11537	-1.48952	-0.895687	-1.59003	-0.299681	0.953407	1.77188	2.97137	0.0226868	-1.47576	2.8661	4.46426	4.15513	4.73716	4.34893
hsa-miR-6509-3p	2.88879	0.792145	8.15582	1.71617e-12	2.15783e-11	17.8501	UP	0.173187	1.49877	1.88126	0.962956	-0.600055	-1.2376	-1.55063	-1.52546	-1.10101	-0.658176	-1.30103	-1.11174	-1.57285	-1.64433	-1.4164	-1.62845	-1.13091	-1.02947	0.899604	4.2933	-1.35138	-1.04535	-0.792648	3.17011	-0.862626	-1.02774	-1.50421	-1.64695	-1.48952	-0.895687	0.342159	4.74888	-1.64229	-1.40019	2.15442	-1.68781	2.3882	-1.5912	-0.878027	-1.39765	-1.4982	-1.2248
hsa-miR-651-5p	-1.20563	-0.479697	-3.60391	0.000508714	0.00151551	-1.18048	DOWN	2.12038	2.38063	2.33874	-1.57134	-1.67742	-1.2376	-1.55063	1.01853	-0.221286	1.57883	2.11468	-1.11174	-1.57285	3.08953	-1.4164	-1.62845	-1.13091	-1.02947	-0.978044	-0.107659	-1.35138	-1.04535	-0.792648	-1.55614	-0.862626	-1.02774	-1.50421	2.25037	-1.48952	-0.895687	-1.59003	-0.299681	-1.64229	3.20803	-0.257016	4.87295	-1.47576	1.54892	-0.878027	-1.39765	-1.4982	4.78377
hsa-miR-6510-5p	1.27935	6.32431	8.82881	6.69538e-14	1.07335e-12	21.0601	UP	5.28734	5.89443	6.71673	5.67738	5.62874	6.02871	4.94553	5.37875	5.67738	6.55424	6.35311	5.87464	6.0524	5.87464	5.84947	5.4454	6.51142	5.64678	5.37146	5.49879	6.48783	6.17014	5.76473	6.38911	7.47827	5.70221	3.90835	5.64011	5.86836	6.77241	4.65824	6.11156	6.87915	5.93768	5.63699	4.8988	5.75765	5.13671	5.77132	2.98173	6.31451	7.05858
hsa-miR-6511a-3p	2.24095	3.88735	5.93603	5.12223e-08	3.34313e-07	7.70394	UP	5.08338	4.11515	4.19962	4.39456	4.62696	-1.2376	-1.55063	3.39475	4.01286	4.27324	4.18536	5.07468	4.864	-0.435593	2.50696	4.35097	4.34136	3.84295	1.72682	4.13305	5.8372	4.26919	-0.792648	5.21668	4.2933	-1.02774	-1.50421	3.44482	4.1047	4.37348	4.84556	-0.299681	4.44701	4.2481	4.25235	2.78158	2.88124	1.87164	-0.878027	-1.39765	4.4536	-1.2248
hsa-miR-6511b-3p	2.26177	4.15259	6.10296	2.44577e-08	1.68187e-07	8.42783	UP	5.38368	4.24053	4.41357	1.38067	4.96342	4.2481	-1.55063	5.08338	5.87464	4.99331	2.81844	4.0589	4.06599	-1.64433	-1.4164	2.05274	4.02768	3.47162	4.42716	-1.66996	4.26919	3.8836	3.88879	5.20735	5.4237	-1.02774	2.13704	4.52625	3.40677	4.04535	4.57232	-0.299681	4.1047	4.22433	5.24823	5.03182	3.89466	2.20943	-0.878027	-1.39765	6.06074	-1.2248
hsa-miR-6511b-5p	-1.57695	5.81411	-8.6184	1.85057e-13	2.8087e-12	20.0536	DOWN	6.81018	6.18622	7.21278	6.37297	6.45174	6.02186	6.51586	7.31996	7.48435	6.5203	6.77241	5.78019	6.94792	6.83223	6.81018	6.62673	6.87346	6.35714	7.04703	5.33051	6.73938	6.75555	6.34908	6.66042	6.13509	6.70667	7.27734	6.48286	6.29226	6.32925	6.70667	6.0678	6.14173	5.77757	6.77241	6.56463	6.27005	6.57651	6.94792	6.84495	6.93345	5.70793
hsa-miR-6512-3p	1.22655	0.611266	2.73209	0.00754677	0.0163216	-3.6808	UP	-1.74038	4.87891	3.08335	-1.57134	-1.67742	-1.2376	-1.55063	-1.52546	-1.67249	2.57271	4.02351	2.74065	1.12945	-1.64433	-1.4164	-1.62845	-1.13091	-1.02947	-1.68431	0.117044	-1.35138	-1.04535	-0.792648	-1.55614	-0.862626	3.8797	-1.50421	-1.64695	-1.48952	-0.895687	-1.59003	-0.299681	4.39029	5.20349	3.06502	0.0724396	2.2171	2.18501	-0.878027	-1.39765	-1.4982	-1.2248
hsa-miR-6514-3p	1.88225	1.14341	4.45765	2.33637e-05	9.33455e-05	1.75583	UP	1.90284	5.21668	1.23657	-1.57134	-0.567423	-1.2376	1.02971	-1.52546	-1.67249	1.78054	2.19112	-1.11174	-1.57285	-1.64433	2.58927	-1.62845	-1.13091	-1.02947	-0.922549	-1.66996	-1.35138	4.47604	4.69265	2.32436	-0.862626	-1.02774	-1.50421	0.49133	4.04535	-0.895687	-1.59003	-0.299681	0.671527	4.49146	-1.5671	-1.68781	-1.47576	-1.5912	-0.878027	-1.39765	-1.4982	-1.2248
hsa-miR-6515-5p	-1.98817	5.45908	-8.09403	2.30824e-12	2.81935e-11	17.5571	DOWN	6.18622	6.02186	6.81018	7.58608	6.39353	6.38135	6.33999	6.19291	5.89443	7.1314	6.76149	4.7208	6.39796	7.1661	6.86776	6.88926	6.92143	6.40753	6.09126	6.7822	5.75103	4.43565	6.15278	6.2501	6.39796	7.17757	7.14311	6.20973	6.53796	6.06427	5.84947	5.57881	5.81844	5.93112	6.71673	6.27774	6.32543	6.14909	9.28653	6.22513	6.58638	6.39353
hsa-miR-652-3p	-2.09989	0.00483504	-5.26945	8.98481e-07	4.67465e-06	4.90862	DOWN	3.20803	1.51388	-1.58516	3.77377	-1.67742	3.94143	3.33615	-1.52546	2.94416	-1.22036	3.66297	4.90246	4.82203	0.571407	-1.4164	1.26198	-1.13091	-1.02947	-1.68431	0.74067	-1.35138	5.046	-0.792648	0.68022	-0.862626	-1.02774	3.5724	3.03425	-1.48952	4.22813	0.510319	-0.299681	0.560143	-1.40019	1.66545	-1.68781	1.30542	3.96854	4.27324	3.84709	2.65031	4.94344
hsa-miR-652-5p	1.02826	6.11641	5.14616	1.50008e-06	7.47862e-06	4.41042	UP	5.65225	5.74471	6.24615	6.34453	5.19915	3.42758	6.59696	5.4611	5.25267	6.45174	6.55424	6.12347	5.57881	5.8879	6.56463	6.14909	6.69642	6.52527	6.24615	-0.69233	5.4611	3.87738	5.17397	4.39029	6.35714	6.41195	6.7822	6.22513	6.19291	5.59032	4.90246	6.47399	5.54935	5.46637	6.66565	6.72852	5.77757	5.61821	5.13671	5.17397	6.20085	5.75103
hsa-miR-654-5p	-2.94935	3.86186	-10.6108	1.21226e-17	3.14085e-16	29.6029	DOWN	5.7392	5.17936	5.37875	4.73484	5.38368	5.45567	5.02788	5.86836	4.60699	5.82756	4.85873	5.7392	5.80519	5.75103	5.99175	5.33051	5.48835	5.93768	6.20085	4.34136	3.50599	4.85873	5.33715	5.53918	5.03631	3.48542	5.29882	5.47725	5.05182	5.52529	5.14043	-0.299681	5.44298	5.1566	4.80959	5.33938	5.54159	5.21185	5.66429	5.82121	5.61821	4.97241
hsa-miR-659-3p	2.15866	3.08653	5.28405	8.45252e-07	4.41563e-06	4.96802	UP	3.52753	4.95114	4.07249	4.02768	0.63511	3.81605	4.65613	3.98714	3.91954	3.28353	4.42903	-1.11174	3.91457	3.15881	2.86312	4.13491	-1.13091	3.84295	2.8786	-0.529462	-1.35138	-1.04535	3.71705	4.50348	-0.862626	5.00664	5.02166	3.40677	4.23237	-0.895687	-1.59003	-0.299681	-1.64229	4.06097	4.7208	3.48763	-1.47576	3.55074	4.78769	2.10562	-1.4982	-1.2248
hsa-miR-660-5p	-1.11685	-0.19317	-2.98987	0.00358098	0.00857629	-2.99973	DOWN	-1.35832	1.13625	-1.58516	-1.57134	1.41426	3.37334	1.48495	-1.52546	-1.67249	3.47727	-1.30103	4.14305	-1.57285	3.36582	2.27422	0.0371758	-1.13091	-1.02947	-0.132143	-1.66996	2.86312	4.94938	-0.792648	-1.55614	-0.862626	-1.02774	3.07924	1.07051	-1.48952	-0.895687	-1.59003	-0.299681	-1.64229	-1.40019	-1.56436	2.50951	-1.47576	3.91457	-0.878027	3.38007	-1.4982	4.25235
hsa-miR-661	1.69518	1.37923	3.92174	0.000169278	0.000569066	-0.138619	UP	-0.817319	2.18807	-1.58516	-1.57134	2.64662	4.5679	3.26026	1.82436	-1.67249	-1.74038	4.76751	-1.11174	-1.57285	-0.0854286	4.67213	3.78005	-1.13091	-1.02947	-0.519011	5.1566	-1.35138	3.60755	-0.792648	-1.55614	-0.862626	-1.02774	-1.50421	-0.709725	-1.48952	3.27386	4.1171	-0.299681	4.91689	-1.40019	4.04895	1.87667	-1.47576	-1.5912	-0.878027	-1.39765	1.22721	-1.2248
hsa-miR-662	-1.3852	0.511868	-3.09269	0.00262674	0.00657326	-2.71396	DOWN	0.0658242	4.36103	2.85211	1.61907	-1.67742	-1.2376	5.21668	2.02826	5.57251	-0.580934	-1.30103	-1.11174	2.57635	1.92825	-1.4164	3.24649	3.97823	4.46662	0.950385	3.92915	-1.35138	-1.04535	-0.792648	-1.55614	-0.862626	-1.02774	-1.50421	1.35236	-1.48952	4.67612	-1.59003	-0.299681	4.96005	-1.40019	-1.72575	3.67607	-1.47576	4.2481	-0.878027	3.67199	1.35511	5.22546
hsa-miR-663a	-1.75913	11.6183	-21.5473	1.06514e-37	9.10692e-35	75.2845	DOWN	12.0097	12.145	12.4915	12.4915	11.6541	12.7487	12.8936	12.6586	12.7487	12.6586	12.7281	12.145	12.7074	12.8026	12.8026	12.3117	12.055	12.3666	12.5455	12.3666	12.8487	12.5455	11.8963	12.3666	12.5455	11.7069	12.3117	12.8487	12.3666	12.7487	12.3666	12.4294	12.6586	12.2004	11.8963	12.3117	12.4915	12.5455	12.7487	12.7487	12.4294	12.7487
hsa-miR-664a-3p	1.23057	1.28942	2.77259	0.00673306	0.0148882	-3.57722	UP	0.111527	3.84295	-1.58516	-1.57134	-0.626505	-1.2376	5.69608	1.21649	-0.15044	2.41395	-1.30103	4.24392	3.25823	1.25466	-1.4164	4.67824	4.15952	-1.02947	-1.68431	3.74453	-1.35138	-1.04535	-0.792648	-1.55614	-0.862626	-1.02774	4.23025	-1.64695	3.62996	4.28985	2.08704	-0.299681	-1.64229	-1.40019	-0.017044	-1.02947	3.66754	3.68271	-0.878027	3.65375	-1.4982	-1.2248
hsa-miR-664a-5p	-1.79501	-0.43675	-4.45023	2.4037e-05	9.55892e-05	1.7285	DOWN	-1.67047	3.14779	-1.58516	-1.57134	-0.917824	3.80497	3.26786	-1.52546	-1.67249	-1.47705	2.62788	3.37599	2.99975	-1.64433	-1.4164	10.7434	-1.13091	-1.02947	-1.68431	-1.66996	-1.35138	-1.04535	3.91095	-1.55614	-0.862626	-1.02774	3.00416	0.534703	2.63286	-0.895687	2.64662	-0.299681	-1.64229	-1.40019	-1.72575	1.87667	3.96854	3.35285	-0.878027	-1.39765	-1.4982	2.76771
hsa-miR-664b-3p	1.93066	2.60129	4.8688	4.6479e-06	2.11007e-05	3.31389	UP	2.56656	2.73163	0.989956	4.00015	1.88824	-1.2376	3.89897	3.13184	-1.67249	3.14525	3.05477	-1.11174	-1.57285	1.30542	2.64662	0.139429	-1.13091	-1.02947	3.312	3.73177	2.82168	-1.04535	-0.792648	3.59038	3.2562	-1.02774	1.66168	3.61108	4.14525	4.63338	4.83376	-0.299681	-1.64229	3.99123	4.32125	-0.0835385	3.58552	3.5252	-0.878027	2.04778	-1.4982	-1.2248
hsa-miR-668-3p	1.81181	3.02609	4.5002	1.98404e-05	8.00168e-05	1.91307	UP	3.8797	3.54579	4.84376	2.65555	3.89466	3.62309	2.48587	3.56796	3.12496	3.35058	-1.30103	3.68271	-1.57285	-1.64433	4.36532	-1.62845	2.79957	3.48024	4.053	2.64216	-1.35138	5.08698	4.29757	5.21185	-0.862626	-1.02774	-1.50421	3.37599	3.48321	-0.895687	-1.59003	-0.299681	4.69426	4.38655	4.01286	4.05682	-1.47576	4.129	3.61462	-1.39765	1.32473	-1.2248
hsa-miR-668-5p	-2.39332	4.53447	-11.689	7.04682e-20	2.28799e-18	34.7114	DOWN	5.59032	5.11037	5.42853	6.15647	5.52529	4.91689	5.57881	5.47725	5.67074	6.0977	6.08343	5.28542	6.36559	6.5203	6.13509	6.15647	5.40174	6.27774	5.17397	4.02153	4.2812	6.17856	4.93536	5.1842	4.36964	6.0373	6.12799	5.77132	5.30804	6.02186	5.4611	6.53024	5.62254	6.11156	5.93112	5.53091	5.69914	5.00178	6.02871	6.04465	6.0524	5.59839
hsa-miR-670-5p	1.37067	0.137373	3.30761	0.00134404	0.00362891	-2.09165	UP	4.05097	-1.61738	1.72496	-1.57134	1.07935	-1.2376	0.941725	-1.52546	-0.0854286	3.43766	-1.30103	-1.11174	-1.57285	-0.407824	-1.4164	-1.62845	-1.13091	-1.02947	-1.68431	-1.66996	3.81154	-1.04535	-0.792648	-1.55614	-0.862626	-1.02774	-1.50421	-1.64695	-1.48952	-0.895687	1.16557	-0.299681	-0.0965934	-1.40019	-0.865516	-1.68781	-1.47576	1.27837	-0.878027	-1.39765	-1.4982	-1.2248
hsa-miR-671-3p	1.14147	2.27303	2.81121	0.00603243	0.0135255	-3.47722	UP	2.99057	3.11998	-1.58516	4.06348	2.91423	-1.2376	3.82482	3.07716	-1.67249	4.49475	3.4337	3.92302	3.95934	4.7452	2.00071	1.99477	5.10032	-1.02947	0.0549011	-0.168626	5.48179	3.86581	-0.792648	-1.55614	-0.862626	-1.02774	3.69567	4.17751	-1.48952	-0.895687	3.20803	-0.299681	2.93552	4.32888	3.12209	-0.010956	3.82482	3.43766	5.47125	-1.39765	-1.4982	-1.2248
hsa-miR-6716-3p	2.79588	1.36148	6.57233	2.94195e-09	2.38801e-08	10.5062	UP	2.65293	-1.61738	-1.58516	-1.57134	-0.513956	-1.2376	-1.55063	3.24649	-1.67249	-1.74038	-1.30103	-1.11174	-1.57285	-1.64433	2.27919	3.4337	-1.13091	-1.02947	3.01327	-1.66996	-1.35138	-1.04535	-0.792648	4.38178	-0.862626	-1.02774	-1.50421	0.378418	-1.48952	-0.895687	-1.59003	-0.299681	5.11037	1.75786	-0.813824	3.99358	-1.47576	-1.5912	-0.878027	-1.39765	1.2086	-1.2248
hsa-miR-6716-5p	1.15024	6.17861	4.39243	2.9965e-05	0.000117523	1.51666	UP	6.21729	6.72852	4.95574	5.49271	7.08269	3.14271	-1.55063	5.84262	5.9344	4.71235	4.62696	5.79052	5.83114	5.15436	5.47725	5.57251	5.23273	5.36714	6.0153	6.2422	5.60716	-1.04535	7.1661	7.67475	6.63545	5.52529	6.08343	5.68357	6.60634	5.26909	6.46538	6.13509	6.61624	6.46538	5.89443	6.38135	6.43033	5.74196	4.93536	6.11156	5.95279	5.28542
hsa-miR-6717-5p	-3.26778	6.78879	-12.5462	1.25921e-21	5.78355e-20	38.7058	DOWN	7.67475	7.65198	8.25386	8.9811	7.7263	8.91338	8.66289	8.20935	8.39767	7.89342	8.1753	6.30065	8.77752	9.00771	8.29252	8.42824	8.22365	8.0401	8.93752	8.30041	8.23813	8.23813	7.98524	8.0401	8.3334	8.73948	8.79879	8.34714	8.49922	8.73948	8.20935	9.1184	8.36458	7.93879	7.8257	8.66289	7.88022	8.49922	9.62142	8.3334	8.01854	8.12968
hsa-miR-6720-3p	-1.03876	-0.587269	-2.95189	0.00400808	0.00944053	-3.10328	DOWN	-0.437286	-1.61738	-1.58516	-1.57134	-1.67742	-1.2376	1.33604	2.74065	0.233005	0.0268077	-1.30103	-1.11174	-1.57285	2.67031	2.38257	-1.62845	-1.13091	-1.02947	3.73622	-1.66996	6.15278	-1.04535	-0.792648	-1.55614	-0.862626	3.2886	2.62051	2.31609	-1.48952	-0.895687	1.92615	-0.299681	-1.64229	-1.40019	-1.72575	-1.68781	3.29504	1.0882	-0.878027	-1.39765	-1.4982	-1.2248
hsa-miR-6720-5p	2.14107	1.17671	5.31906	7.29839e-07	3.85987e-06	5.11087	UP	2.31609	1.06785	-1.58516	-1.57134	-0.658176	4.1047	-1.55063	-1.52546	3.32137	-0.554659	-1.30103	-1.11174	-1.57285	3.87047	-1.4164	1.76451	-1.13091	-1.02947	-1.68431	-1.66996	-1.35138	-1.04535	-0.792648	-1.55614	3.55074	-1.02774	-1.50421	1.99477	-1.48952	3.30163	0.652945	-0.299681	4.69985	-1.40019	2.21446	0.514275	-1.47576	-1.5912	4.85873	-1.39765	-1.4982	-1.2248
hsa-miR-6721-5p	1.18185	7.06832	8.86666	5.57531e-14	8.99413e-13	21.2414	UP	6.69642	7.09342	6.14909	6.77241	7.44288	6.55943	3.93115	6.12799	5.77757	6.32925	6.73938	6.81018	6.17856	5.99582	7.02346	6.34908	6.60634	5.81844	6.77241	6.21729	6.76149	5.99958	8.11321	6.98067	6.45619	6.63545	6.69642	6.15647	6.95922	4.95574	6.94792	4.50727	5.82398	7.95247	7.09342	7.18369	7.01285	6.38135	6.51142	6.66565	6.38911	6.45619
hsa-miR-6726-3p	1.5946	4.42008	5.46691	3.90697e-07	2.21222e-06	5.71946	UP	4.864	5.19348	3.98509	1.51154	4.37545	3.45734	-1.55063	5.27545	2.88436	3.10982	3.8797	5.82398	1.11385	4.33309	4.84196	4.32516	5.33492	5.00664	4.33711	1.5057	5.3505	4.64627	4.72275	3.7401	4.763	-1.02774	2.17086	4.38655	4.38655	-0.895687	4.82203	4.9221	5.28542	4.52151	4.42279	4.39242	3.26026	1.04963	3.32364	3.83486	4.99551	-1.2248
hsa-miR-6727-3p	1.02488	4.8629	3.67748	0.000396379	0.00121181	-0.945053	UP	5.5043	5.4112	5.13188	5.68357	5.26743	4.53269	5.29882	4.26919	2.37869	4.9977	5.03182	6.02871	3.15406	5.4137	6.0153	3.89259	4.80317	4.01724	2.62051	4.49146	4.36748	-1.04535	5.30546	5.11277	4.81346	6.15647	5.40418	5.24823	3.26026	-0.895687	4.19143	-0.299681	4.01081	5.51466	5.25496	4.93738	5.5196	5.40418	-0.878027	5.3218	3.8232	4.57736
hsa-miR-6728-3p	2.74995	3.00423	7.07401	2.89823e-10	2.76356e-09	12.7868	UP	3.55074	3.57491	-1.58516	4.15141	0.747659	-1.2376	3.83049	3.37334	0.975099	-0.87667	2.18005	2.90998	-1.57285	0.117044	3.92302	-1.62845	2.91423	-1.02947	4.22623	-0.445286	2.38257	-1.04535	4.28593	0.752593	-0.862626	-1.02774	4.04895	4.44496	4.46897	-0.895687	2.07862	-0.299681	0.461011	2.58603	4.99974	3.36188	4.53457	2.84316	-0.878027	-1.39765	3.01327	2.62788
hsa-miR-6730-5p	1.56976	2.18699	3.90543	0.000179359	0.00059903	-0.193612	UP	1.09193	-1.61738	3.89069	0.711802	-0.97022	-1.2376	3.77588	1.90942	3.39914	4.73716	2.34397	3.25823	-1.57285	0.695846	2.66055	4.31108	-1.13091	-1.02947	4.34893	2.72643	2.555	-1.04535	-0.792648	-1.55614	4.0822	4.7713	-1.50421	3.05152	4.45134	-0.895687	2.42905	-0.299681	0.211797	1.91809	4.94344	3.20571	2.37551	-1.5912	-0.878027	4.09829	2.11035	-1.2248
hsa-miR-6731-5p	1.57332	4.75699	5.37896	5.67144e-07	3.07553e-06	5.35639	UP	5.01102	1.61354	5.05674	2.00532	4.85412	-1.2376	2.14851	4.17144	4.96342	4.85412	5.25724	3.38938	4.80317	4.66563	4.65009	5.06179	4.56605	-1.02947	4.9221	3.98303	4.69265	5.64011	3.62726	5.40663	5.38104	3.54579	5.39673	5.43067	4.57736	5.5592	4.00668	-0.299681	4.53865	3.92915	5.08338	4.23237	4.98921	1.94586	4.68454	5.65225	5.33938	4.0404
hsa-miR-6732-3p	1.8548	4.51101	6.17319	1.78786e-08	1.25297e-07	8.73493	UP	3.87276	4.72855	4.95114	4.25675	4.80959	2.35653	4.36748	4.3432	3.91954	4.70812	-1.30103	4.23237	3.58552	5.35273	2.12038	5.07002	5.06629	4.56605	5.30288	3.312	5.1566	-1.04535	-0.792648	6.17014	5.10547	-1.02774	2.98621	4.1634	2.93552	5.12412	4.06097	-0.299681	4.48074	4.41566	4.5591	3.48763	5.29882	1.91989	-0.878027	3.18799	4.7452	4.22813
hsa-miR-6734-3p	1.32893	3.04994	3.54764	0.000614321	0.00180281	-1.3581	UP	0.772418	3.07716	4.57011	2.27422	2.06241	2.60512	3.57491	-1.52546	4.54855	2.72225	-1.30103	4.60699	3.66754	1.07051	-1.4164	5.02788	-1.13091	4.79703	-0.0886374	1.77612	4.21405	4.54441	3.60184	5.03182	5.05428	3.88879	-1.50421	1.15088	3.29504	-0.895687	3.39914	-0.299681	4.51676	3.9181	1.44319	3.48763	2.11879	1.84452	-0.878027	-1.39765	3.08953	3.80497
hsa-miR-6734-5p	3.69781	2.00767	9.50684	2.51153e-15	4.60149e-14	24.313	UP	2.04287	-1.61738	-1.58516	-1.57134	1.93238	-1.2376	-1.55063	-1.52546	-1.07747	-0.881044	2.85211	-1.11174	-1.57285	3.2034	-1.4164	2.27422	4.52151	-1.02947	0.658231	4.25235	3.92302	-1.04535	3.84957	1.56813	-0.862626	-1.02774	-1.50421	0.139429	-1.48952	-0.895687	-1.59003	-0.299681	3.52029	-1.40019	0.0683846	0.652945	-1.47576	-1.5912	-0.878027	-1.39765	4.31516	-1.2248
hsa-miR-6735-3p	2.34319	2.72443	5.89471	6.14306e-08	3.92941e-07	7.52612	UP	-1.62059	3.85591	5.10032	-1.57134	3.33179	-1.2376	3.27738	-1.52546	2.10798	0.701912	2.39621	5.1473	2.79251	1.88575	1.82044	2.06241	2.67031	3.42507	4.7452	-0.806912	1.93442	-1.04535	-0.792648	-1.55614	-0.862626	-1.02774	3.72325	0.233005	4.90488	-0.895687	4.91247	-0.299681	0.312901	1.86618	3.71875	1.93727	4.36103	3.64677	-0.878027	4.23025	-1.4982	-1.2248
hsa-miR-6736-3p	3.6838	2.04989	9.74787	7.81604e-16	1.54216e-14	25.4703	UP	-0.778791	0.93522	-1.58516	-1.57134	1.01853	-1.2376	4.97241	3.13725	-1.67249	-1.74038	-1.30103	-1.11174	3.19902	-1.64433	-1.4164	-1.62845	-1.13091	-1.02947	0.227648	-1.66996	1.87667	4.89205	-0.792648	-1.55614	-0.862626	-1.02774	4.00668	-0.120967	1.15088	-0.895687	3.01535	-0.299681	-1.64229	-1.40019	4.61673	4.07434	3.9181	-1.5912	-0.878027	-1.39765	-1.4982	-1.2248
hsa-miR-6737-3p	2.58361	1.81224	6.68644	1.74439e-09	1.48157e-08	11.02	UP	-0.261725	2.68346	-1.58516	-1.57134	-0.865516	-1.2376	0.840209	5.49575	-1.67249	0.284467	-1.30103	4.32125	3.91095	2.74629	2.60512	-1.62845	3.41165	-1.02947	2.05274	-0.154703	3.63522	-1.04535	4.98727	1.35951	-0.862626	4.49475	-1.50421	2.50951	3.73816	-0.895687	-1.59003	-0.299681	-1.64229	-1.40019	2.79251	0.338967	-1.47576	-1.5912	-0.878027	-1.39765	1.92392	-1.2248
hsa-miR-6738-3p	3.16794	1.13013	8.14322	1.82311e-12	2.27004e-11	17.7903	UP	1.51622	-1.61738	-1.58516	-1.57134	-1.67742	-1.2376	-1.55063	1.3472	-1.67249	3.96456	3.59531	-1.11174	-1.57285	0.691099	-1.4164	1.2728	3.36188	-1.02947	-1.68431	5.64011	6.39796	-1.04535	-0.792648	-1.55614	-0.862626	-1.02774	-1.50421	-1.64695	2.16792	-0.895687	-1.59003	-0.299681	-1.64229	3.22136	-1.4164	-0.196703	-1.47576	-1.5912	-0.878027	-1.39765	-1.4982	-1.2248
hsa-miR-6739-3p	1.33953	0.322698	3.48443	0.000757597	0.00215436	-1.55511	UP	1.58936	-1.61738	3.95368	-1.57134	-0.173901	-1.2376	-1.55063	2.36484	2.20617	4.98921	-1.30103	-1.11174	-1.57285	-1.64433	-1.4164	-1.62845	-1.13091	-1.02947	-1.68431	2.32436	-1.35138	4.48286	-0.792648	2.99975	-0.862626	-1.02774	-1.50421	0.995791	-1.48952	4.46007	-1.59003	-0.299681	-1.64229	-1.40019	-0.973484	-1.68781	-1.47576	-1.5912	-0.878027	-1.39765	1.66168	-1.2248
hsa-miR-6740-3p	3.77591	1.96049	9.54884	2.04922e-15	3.80887e-14	24.5147	UP	1.60336	-1.61738	3.94355	-1.57134	-1.67742	-1.2376	-1.55063	3.29504	-1.67249	4.41566	2.81063	-1.11174	-1.57285	3.49786	-1.4164	-1.62845	-1.13091	-1.02947	0.293604	6.60634	5.04347	4.15732	-0.792648	-1.55614	4.28593	-1.02774	-1.50421	0.0549011	-1.48952	-0.895687	0.326187	-0.299681	-1.64229	2.54218	3.55871	0.092	-1.47576	-1.5912	-0.878027	-1.39765	-1.4982	-1.2248
hsa-miR-6740-5p	1.87929	0.206087	4.65042	1.10642e-05	4.66773e-05	2.4758	UP	-1.74038	-1.61738	2.0183	0.989956	-0.909813	-1.2376	-1.55063	-1.52546	-1.67249	0.899604	-1.30103	-1.11174	-1.57285	-1.64433	-1.4164	-1.62845	-1.13091	-1.02947	-1.68431	5.93768	5.11943	-1.04535	-0.792648	0.953407	-0.862626	-1.02774	-1.50421	-1.64695	-1.48952	-0.895687	-1.59003	-0.299681	-1.64229	-1.40019	1.45715	-0.895687	-1.47576	-1.5912	-0.878027	-1.39765	-1.4982	-1.2248
hsa-miR-6741-3p	2.98079	3.46092	7.59205	2.53059e-11	2.79783e-10	15.1914	UP	2.07862	5.10547	-1.58516	2.28507	4.27324	-1.2376	-1.55063	-1.52546	4.55407	1.60689	-1.30103	4.28593	1.93035	3.33179	-1.4164	-1.62845	3.29834	-1.02947	3.80931	2.13326	-1.35138	4.38178	5.03631	5.07002	4.2812	-1.02774	1.24918	4.57232	2.06927	4.10831	-1.59003	-0.299681	5.30085	2.67031	3.46691	4.34136	3.34831	2.95459	-0.878027	-1.39765	3.71041	-1.2248
hsa-miR-6742-3p	3.14317	1.73491	8.10704	2.16869e-12	2.6718e-11	17.6187	UP	3.11287	2.66543	-1.58516	-1.57134	2.74814	-1.2376	-1.55063	-1.52546	3.50847	0.764319	-1.30103	4.22433	-1.57285	-1.64433	-1.4164	-1.62845	-1.13091	-1.02947	-1.68431	-1.66996	4.39821	-1.04535	-0.792648	4.13119	5.07002	3.91276	-1.50421	1.79145	-1.48952	-0.895687	-1.59003	-0.299681	4.36103	-1.40019	0.0201978	-1.68781	-1.47576	2.14055	-0.878027	-1.39765	4.16751	-1.2248
hsa-miR-6743-3p	1.4711	4.60783	4.55623	1.59763e-05	6.57772e-05	2.12163	UP	3.12496	5.79908	2.98621	5.3172	5.10032	4.29757	3.80931	5.3218	4.12252	3.99358	4.43565	5.60142	1.23657	4.7208	5.67738	2.12038	5.42853	4.77593	5.08698	-0.634209	2.36929	-1.04535	-0.792648	4.16545	3.98714	4.763	5.21185	4.14305	5.48179	-0.895687	5.74471	-0.299681	3.17466	5.12992	5.86836	5.05674	5.2304	6.2422	-0.878027	4.51246	2.96554	4.76751
hsa-miR-6744-3p	2.39371	1.31279	6.28781	1.06914e-08	7.83525e-08	9.23918	UP	1.32708	3.06034	-1.58516	4.44496	-1.67742	-1.2376	1.04247	3.39914	-1.67249	-1.74038	-1.30103	-1.11174	3.46258	2.52925	-1.4164	2.60512	-1.13091	-1.02947	2.68052	-1.66996	-1.35138	-1.04535	-0.792648	1.25832	-0.862626	-1.02774	1.8567	2.71412	-1.48952	-0.895687	-1.59003	-0.299681	-1.64229	4.6246	-0.242846	-0.819159	-1.47576	0.903571	-0.878027	-1.39765	-1.4982	-1.2248
hsa-miR-6745	1.87552	0.920724	4.48792	2.08004e-05	8.37566e-05	1.86761	UP	2.12895	1.88126	-1.58516	2.90536	-1.67742	3.36582	-1.55063	3.3567	-1.67249	-1.55933	3.28353	3.42256	3.02289	2.58203	-1.4164	-1.62845	-1.13091	-1.02947	-0.353934	-1.66996	-1.35138	-1.04535	-0.792648	-1.55614	-0.862626	-1.02774	3.35929	-1.64695	-1.48952	-0.895687	3.23526	-0.299681	-1.64229	-1.40019	3.49018	1.62097	-1.47576	-1.5912	-0.878027	-1.39765	2.09311	-1.2248
hsa-miR-6746-5p	-1.25738	7.50675	-15.2863	5.58021e-27	7.53329e-25	50.93	DOWN	7.9979	7.92502	8.15984	8.8637	7.34266	8.72074	8.58736	8.30041	8.02582	8.28464	8.34714	7.25001	8.39767	8.64662	8.23813	8.48088	8.26824	8.19187	8.3334	7.72068	7.50175	8.30041	7.68901	7.70108	8.12968	8.62567	8.3153	8.3153	8.34714	8.30041	7.85325	8.32435	7.70108	7.66471	8.30041	8.19187	7.7263	8.06824	8.12968	7.98524	8.19187	8.08349
hsa-miR-6747-3p	2.51573	3.00865	6.21913	1.45554e-08	1.03134e-07	8.93656	UP	2.77279	3.47445	4.96582	1.68056	4.37545	-1.2376	-1.55063	1.94586	-1.67249	5.04095	-1.30103	4.19498	1.22721	-1.64433	-1.4164	3.96113	-1.13091	3.70805	0.531901	2.96252	2.14205	4.16751	-0.792648	4.02153	4.83376	-1.02774	-1.50421	0.514275	3.92099	4.03693	1.75786	-0.299681	4.141	2.00532	3.7972	5.2442	4.05491	-1.5912	-0.878027	-1.39765	2.13503	2.42905
hsa-miR-6748-3p	3.4565	2.4587	8.59538	2.06807e-13	3.08407e-12	19.9436	UP	1.62097	1.71777	4.98921	4.19962	4.33309	-1.2376	-1.55063	1.29964	0.475736	4.46897	-1.30103	-1.11174	-1.57285	-1.64433	-1.4164	3.60755	-1.13091	-1.02947	3.5252	5.77445	4.60699	3.60184	-0.792648	2.25239	-0.862626	3.04167	-1.50421	-1.64695	-1.48952	-0.895687	-1.59003	-0.299681	-1.64229	2.50442	4.00015	-1.68781	2.17086	1.93035	-0.878027	-1.39765	-1.4982	-1.2248
hsa-miR-6748-5p	-1.21741	4.62776	-4.52343	1.81393e-05	7.36457e-05	1.99936	DOWN	5.10032	5.00664	6.06074	5.28542	4.9073	5.61821	4.1047	5.38632	5.8104	5.8372	5.03631	-1.11174	5.60429	5.44298	5.87819	5.88175	5.23948	4.66563	5.85299	5.91648	5.32587	3.41834	4.92427	5.27075	6.14173	6.12799	6.27774	5.58468	5.4611	5.52529	4.59528	5.93112	5.3624	4.23434	5.43067	5.54441	5.10032	4.22813	5.49271	5.79335	6.2422	4.84556
hsa-miR-6749-3p	1.59562	4.64951	5.14295	1.5201e-06	7.54168e-06	4.39755	UP	4.763	5.35727	5.69012	4.80118	5.01963	2.22982	3.72325	4.92644	4.34136	3.58795	5.21185	5.24823	4.54048	5.29882	4.63338	-1.62845	4.61148	4.18536	3.98714	3.04634	3.02508	3.99593	5.43067	5.49879	5.16149	3.67007	-1.50421	3.11537	5.45567	-0.895687	2.8402	-0.299681	5.86246	4.02351	4.5679	4.51246	5.15436	1.26198	4.31302	1.88575	5.10032	3.44726
hsa-miR-675-3p	1.33242	3.37425	3.00329	0.00344044	0.00829391	-2.96289	UP	3.30551	5.67738	-1.58516	1.57087	5.99958	2.58603	1.05709	3.33615	-0.214022	-1.74038	-1.30103	-1.11174	2.61393	-1.64433	3.30551	3.99123	2.58203	-1.02947	3.19436	-1.66996	-1.35138	3.56125	4.89462	5.46637	3.57992	-1.02774	2.07862	3.59285	2.13503	-0.895687	4.94763	5.05674	4.59748	5.52529	4.32516	5.22174	5.77132	2.31832	3.39695	1.94413	3.25203	4.01286
hsa-miR-6750-3p	3.0623	3.12814	6.94101	5.38301e-10	4.93122e-09	12.177	UP	5.23505	3.11998	2.00985	2.38538	4.49146	-1.2376	-1.55063	4.30735	2.47133	1.42822	-1.30103	5.09399	3.27738	3.1657	-1.4164	-1.62845	-1.13091	4.0885	-1.68431	0.63511	4.32888	4.35097	-0.792648	4.9768	3.59038	-1.02774	-1.50421	-1.64695	3.21841	-0.895687	-1.59003	-0.299681	2.08243	-1.40019	4.01286	4.42716	-1.47576	-1.5912	3.36582	-1.39765	3.04634	-1.2248
hsa-miR-6751-3p	3.85349	1.43636	11.8786	2.87551e-20	9.83426e-19	35.601	UP	-0.810121	-1.61738	-1.58516	1.77612	-0.242846	-1.2376	-1.55063	-1.52546	-1.67249	-0.935352	-1.30103	-1.11174	-1.57285	-1.64433	-1.4164	0.965918	2.8402	-1.02947	0.0724396	-0.784121	-1.35138	-1.04535	-0.792648	1.06431	-0.862626	-1.02774	1.75577	-1.64695	-1.48952	-0.895687	-1.59003	-0.299681	-1.64229	2.18005	4.36748	-1.03319	2.59614	4.12079	-0.878027	-1.39765	-1.4982	-1.2248
hsa-miR-6751-5p	4.00959	2.29191	9.95675	2.84466e-16	5.98078e-15	26.4726	UP	3.23526	0.674571	-1.58516	1.43053	3.86581	-1.2376	-1.55063	2.92004	3.14525	5.34164	2.7889	-1.11174	-1.57285	-1.64433	-1.4164	-1.62845	-1.13091	-1.02947	2.0843	-0.891538	4.33309	-1.04535	-0.792648	5.01963	-0.862626	-1.02774	2.52925	1.32944	-1.48952	-0.895687	-1.59003	-0.299681	1.16557	-1.40019	0.384198	0.71633	-1.47576	-1.5912	-0.878027	-1.39765	2.45353	-1.2248
hsa-miR-6752-3p	1.29947	3.97386	3.74001	0.000319838	0.000999252	-0.742207	UP	3.90348	5.10032	4.85024	5.15179	3.71041	2.40107	-1.55063	3.79351	2.27046	3.75724	4.5506	4.13895	4.13491	5.70221	4.37156	5.26281	5.56684	4.02351	3.48763	-1.66996	3.33942	-1.04535	4.13119	4.70621	3.51096	5.12992	5.05428	4.03693	5.49271	4.353	5.10547	-0.299681	3.78235	2.11468	5.84604	5.26909	4.78769	3.69771	-0.878027	3.08953	1.87164	-1.2248
hsa-miR-6753-3p	3.50234	1.7299	9.97434	2.6127e-16	5.58465e-15	26.557	UP	0.456571	-1.61738	5.15436	-1.57134	-1.67742	-1.2376	-1.55063	-1.52546	-1.67249	3.29834	3.28353	-1.11174	-1.57285	2.36484	3.09469	-1.62845	-1.13091	-1.02947	1.74523	0.818363	-1.35138	-1.04535	-0.792648	2.06241	-0.862626	-1.02774	1.25466	-1.64695	-1.48952	-0.895687	2.57635	-0.299681	3.10025	1.70463	2.76234	1.55254	-1.47576	-1.5912	-0.878027	-1.39765	-1.4982	-1.2248
hsa-miR-6754-3p	3.43772	2.62005	8.35516	6.58347e-13	8.93471e-12	18.7977	UP	2.20617	3.44726	1.30542	-1.57134	3.78235	-1.2376	2.84613	3.54051	-1.67249	2.86909	-1.30103	-1.11174	-1.57285	0.668484	3.3193	4.64627	-1.13091	-1.02947	-1.68431	5.22793	3.71875	-1.04535	-0.792648	-1.55614	-0.862626	3.90575	-1.50421	0.458791	1.79786	-0.895687	3.70805	-0.299681	2.43436	4.27735	4.69985	2.75	3.53471	-1.5912	-0.878027	-1.39765	-1.4982	-1.2248
hsa-miR-6754-5p	1.51692	3.55327	4.21131	5.91453e-05	0.000213673	0.864671	UP	4.55234	2.84613	3.01742	4.44496	3.81834	-1.2376	-1.55063	4.96342	-1.67249	5.16924	4.25235	4.24053	4.46007	3.09469	1.84452	3.19669	2.72225	-1.02947	4.89462	0.68022	3.15233	-1.04535	3.67823	4.06348	-0.862626	-1.02774	3.49273	4.97241	3.19669	3.70569	2.76503	-0.299681	3.86814	3.0089	4.60924	3.96854	3.71041	2.84316	5.06629	1.65575	4.79222	3.61108
hsa-miR-6756-3p	1.54137	4.59013	4.68397	9.69752e-06	4.11823e-05	2.60303	UP	4.82802	4.9814	3.05152	5.46637	5.12796	-1.2376	-1.55063	4.72469	3.52753	5.13188	3.85838	4.93536	2.71721	-1.64433	5.12992	1.40256	4.91689	3.61108	3.88165	6.0373	5.37645	-1.04535	4.82623	5.96637	5.67074	2.88748	4.0822	0.183571	-1.48952	3.49273	4.71859	4.52625	3.8797	4.39242	5.91648	4.91247	5.42101	4.24392	4.81749	4.41776	4.87703	4.49146
hsa-miR-6757-3p	3.31672	0.90309	10.9491	2.3907e-18	6.73863e-17	31.2139	UP	-1.42196	-1.61738	-1.58516	-1.57134	-1.2016	-1.2376	-1.55063	-1.52546	3.61462	-0.903835	-1.30103	-1.11174	-1.57285	1.78252	-1.4164	-1.62845	-1.13091	-1.02947	-1.15469	0.49133	-1.35138	-1.04535	-0.792648	4.06348	-0.862626	-1.02774	-1.50421	-1.64695	-1.48952	-0.895687	-1.59003	-0.299681	1.72496	-1.40019	-1.72575	1.58511	-1.47576	-1.5912	-0.878027	-1.39765	-1.4982	-1.2248
hsa-miR-6758-3p	1.28483	-0.34525	3.97212	0.000141435	0.000479868	0.0323579	UP	3.38938	-1.61738	-1.58516	-1.57134	-1.67742	-1.2376	-1.55063	-1.52546	-0.556896	-1.74038	-1.30103	-1.11174	-1.57285	-1.64433	-1.4164	-1.62845	-1.13091	-1.02947	-1.68431	0.442791	-1.35138	-1.04535	-0.792648	-1.55614	-0.862626	-1.02774	-1.50421	-1.64695	-1.48952	-0.895687	-1.59003	-0.299681	2.84316	-1.40019	-1.72575	-0.57178	-1.47576	-1.5912	-0.878027	-1.39765	2.19112	-1.2248
hsa-miR-6758-5p	2.59564	1.95331	6.41696	5.96611e-09	4.52754e-08	9.81171	UP	2.89996	1.51388	-1.58516	3.18133	3.36582	4.77593	-1.55063	-1.52546	1.22442	1.55909	3.24649	-1.11174	2.92525	-1.64433	3.8011	-1.62845	3.41165	-1.02947	3.27738	2.70529	-1.35138	-1.04535	-0.792648	4.22813	-0.862626	-1.02774	-1.50421	2.64216	1.57087	3.95755	-1.59003	-0.299681	0.0549011	-1.40019	2.85211	1.24084	-1.47576	-1.5912	-0.878027	-1.39765	1.86618	-1.2248
hsa-miR-6759-3p	2.72805	3.51336	6.44746	5.19533e-09	4.03819e-08	9.94755	UP	2.03552	4.5591	1.49877	3.11287	4.06599	-1.2376	-1.55063	3.78235	1.54513	-0.69233	4.06832	5.08338	3.80931	3.81605	4.35658	3.17466	-1.13091	4.12466	4.36103	-1.66996	4.46897	3.47162	-0.792648	2.38996	-0.862626	5.80519	4.9073	-1.64695	-1.48952	-0.895687	2.67757	-0.299681	2.42159	4.65009	4.62058	4.70621	4.61865	4.92644	-0.878027	-1.39765	-1.4982	4.2481
hsa-miR-6759-5p	1.91324	3.86053	4.69872	9.14985e-06	3.91809e-05	2.65915	UP	5.52245	2.25037	3.76212	5.06179	4.04895	-1.2376	-1.55063	4.12252	4.81749	5.53091	2.3882	-1.11174	2.67031	-1.64433	4.18932	4.61148	3.65375	3.30357	-0.101758	3.09469	5.38104	-1.04535	5.046	5.55147	4.9768	4.95574	2.91714	4.54649	2.56184	-0.895687	-1.59003	4.65824	5.42101	3.07299	5.80519	4.02351	3.50184	2.01438	4.00323	-1.39765	3.88165	-1.2248
hsa-miR-6760-3p	2.40616	2.89827	5.99139	4.01218e-08	2.66587e-07	7.94303	UP	1.2387	3.62726	2.07226	4.42903	4.763	-1.2376	2.03784	-1.52546	-0.881044	0.877253	4.12252	-1.11174	-1.57285	-0.500604	5.22174	4.95574	4.23237	2.95053	-1.03832	-1.66996	-1.35138	-1.04535	4.66082	2.66055	4.24223	3.74453	4.23842	1.94586	1.88351	5.49879	4.44496	-0.299681	-1.64229	2.13149	4.31302	3.69363	4.83758	2.61393	-0.878027	-1.39765	3.9181	-1.2248
hsa-miR-6760-5p	-1.8201	5.02361	-7.12305	2.30495e-10	2.22263e-09	13.0124	DOWN	5.4162	6.0153	5.78281	7.07141	5.60716	5.43067	6.53796	5.17666	5.65225	6.41637	6.2739	5.1473	6.14173	7.35304	6.45619	6.43033	6.4928	6.15278	6.55424	6.14909	5.8104	3.87047	5.70793	4.90063	5.7392	7.008	7.12032	6.14909	6.43033	4.73716	5.63699	-0.299681	3.9181	5.20735	6.63545	6.18622	6.49751	7.30541	6.56463	6.64488	5.8372	6.0678
hsa-miR-6761-3p	3.38807	2.53385	8.81025	7.3241e-14	1.16685e-12	20.9713	UP	1.83481	4.49146	0.752593	2.555	0.908879	-1.2376	-1.55063	-1.52546	-0.244681	-0.127451	-1.30103	4.74334	-1.57285	0.610495	-1.4164	4.34504	-1.13091	-1.02947	-1.68431	-0.0816484	3.97823	3.56602	-0.792648	-1.55614	-0.862626	3.24132	2.50951	0.806187	-1.48952	-0.895687	3.66501	-0.299681	0.467604	3.81834	3.45734	4.12079	-1.47576	-1.5912	-0.878027	-1.39765	2.38996	2.30168
hsa-miR-6762-3p	4.27578	1.42795	15.1014	1.24647e-26	1.5986e-24	50.1338	UP	-0.190736	-1.61738	-1.58516	-1.57134	1.83974	-1.2376	-1.55063	-1.52546	-1.67249	0.00904396	-1.30103	-1.11174	0.93522	-1.64433	-1.4164	1.95803	-1.13091	-1.02947	-1.68431	5.53384	2.23589	-1.04535	-0.792648	-1.55614	-0.862626	-1.02774	-1.50421	-1.64695	-1.48952	-0.895687	-1.59003	-0.299681	-1.64229	2.10057	1.76774	-1.68781	-1.47576	-1.5912	-0.878027	-1.39765	-1.4982	-1.2248
hsa-miR-6764-3p	1.99297	0.564922	4.88409	4.37067e-06	1.9948e-05	3.37342	UP	-1.74038	-1.61738	-1.58516	3.57742	-1.67742	-1.2376	-1.55063	-1.52546	-1.67249	-1.23084	-1.30103	-1.11174	-1.57285	-1.64433	-1.4164	-1.62845	-1.13091	-1.02947	-1.68431	5.59032	-1.35138	3.86085	-0.792648	0.794615	4.27735	-1.02774	-1.50421	0.0771099	-1.48952	-0.895687	3.18466	4.82203	-0.512275	-1.40019	-1.72575	1.49877	-1.47576	-1.5912	-0.878027	-1.39765	-1.4982	-1.2248
hsa-miR-6765-3p	-1.15963	7.57999	-6.65596	2.00624e-09	1.67078e-08	10.8825	DOWN	8.30041	7.90949	8.2165	7.79764	8.0401	8.41466	7.83932	8.11321	7.7263	7.17757	7.83932	8.19187	7.23842	8.46324	7.90146	7.01285	8.19187	8.48088	8.20935	9.14214	8.14455	8.3334	7.73944	8.15984	7.89342	8.25386	7.78429	9.25742	8.12968	9.56193	9.09969	8.44376	7.40465	8.58736	7.35919	8.06824	7.33187	7.96987	9.88389	7.86601	9.00771	7.57286
hsa-miR-6765-5p	1.29792	10.3111	18.34	1.80574e-32	3.85976e-30	63.4314	UP	9.62142	10.0433	9.81192	9.47933	9.64725	9.40156	9.7082	9.59044	9.33621	9.88389	9.96364	9.92015	9.47933	10.0864	9.62142	9.59044	9.81192	9.42808	9.59044	10.0433	10.0864	9.67509	9.64725	10.4861	10.419	9.49225	9.25742	9.35637	9.1904	9.47933	9.50516	9.81192	9.86504	9.7082	10.2934	9.92015	9.81192	9.45357	9.33621	9.64725	9.59044	9.92015
hsa-miR-6766-5p	-1.03365	6.17672	-8.77691	8.60501e-14	1.34584e-12	20.8117	DOWN	6.32925	6.68604	7.26191	6.38911	6.68604	5.94475	7.28287	7.09342	7.08269	6.42208	6.63545	6.12347	6.64488	6.4928	6.42208	6.96888	7.07141	6.45619	6.71673	6.5462	6.27005	4.12466	7.30037	7.1314	6.30413	6.98067	6.77241	6.5462	6.83223	6.30065	6.43033	6.98067	6.65519	6.75555	6.20973	6.87915	6.08343	6.15647	6.60634	6.98067	6.98636	6.7822
hsa-miR-6769a-3p	1.68146	4.09479	5.26414	9.18654e-07	4.7507e-06	4.88702	UP	3.61829	4.35658	4.70812	3.56125	3.12496	-1.2376	1.29964	5.33938	2.19112	5.38104	4.53269	5.5043	5.22546	4.65205	3.2034	0.384198	3.18799	3.52986	4.81153	3.4523	3.71535	-1.04535	-0.792648	4.2812	3.74231	-1.02774	3.79351	4.34504	3.94973	4.68245	3.01535	5.4162	4.97241	4.84196	5.26743	4.25235	4.70621	1.11019	-0.878027	3.52986	4.43565	4.28593
hsa-miR-6769b-3p	1.33669	3.40633	3.97351	0.000140733	0.00047812	0.037092	UP	3.81834	4.32125	2.39173	-1.57134	4.49475	-1.2376	3.45734	5.33492	1.39509	4.74147	-1.30103	3.27738	3.312	3.08538	2.85856	2.66543	2.86312	4.23434	2.86084	5.24621	-1.35138	-1.04535	3.55074	3.42256	4.84196	3.57992	4.03866	4.17144	-1.48952	5.02166	3.57491	4.68036	4.88078	2.39621	2.96554	5.1716	3.80931	0.962956	-0.878027	4.1047	1.38067	4.24392
hsa-miR-6770-3p	3.41483	2.92328	8.52686	2.87835e-13	4.19486e-12	19.6164	UP	4.53661	2.7853	-1.58516	5.10032	4.06097	3.84502	-1.55063	5.31315	3.40469	-1.74038	5.28542	4.7043	2.99057	4.21205	3.11287	0.933033	4.7452	3.89897	0.423022	4.03471	3.57992	4.85218	-0.792648	2.26453	3.61645	-1.02774	-1.50421	1.93727	-1.48952	-0.895687	-1.59003	-0.299681	2.90767	-1.40019	3.85838	-1.13807	-1.47576	-1.5912	-0.878027	-1.39765	-1.4982	-1.2248
hsa-miR-6771-3p	1.6633	2.17616	3.9279	0.000165607	0.000558189	-0.117771	UP	2.33874	-1.61738	2.90536	-1.57134	1.09566	-1.2376	-1.55063	2.86084	3.54315	3.22136	-1.30103	-1.11174	-1.57285	-1.64433	-1.4164	4.44496	-1.13091	-1.02947	2.555	2.69412	-1.35138	-1.04535	-0.792648	1.09846	3.44238	-1.02774	2.11035	4.31302	-1.48952	6.33999	-1.59003	5.28078	2.09311	2.3724	4.2812	3.19436	-1.47576	0.711802	-0.878027	2.72643	3.61829	4.90246
hsa-miR-6772-3p	3.767	1.14584	11.4392	2.30494e-19	7.20996e-18	33.5353	UP	-1.2976	1.82996	0.74067	-1.57134	-1.67742	-1.2376	-1.55063	-1.52546	0.00376923	-1.23333	-1.30103	-1.11174	-1.57285	-1.64433	-1.4164	1.01853	-1.13091	3.00196	-1.68431	4.15141	3.91457	-1.04535	-0.792648	-1.55614	-0.862626	-1.02774	-1.50421	-1.64695	-1.48952	5.59536	-1.59003	-0.299681	0.639451	-1.40019	2.05026	-1.68781	-1.47576	-1.5912	-0.878027	-1.39765	-1.4982	-1.2248
hsa-miR-6772-5p	1.64761	4.02972	4.27352	4.69151e-05	0.000175675	1.08654	UP	4.34504	2.4363	5.10032	4.27324	5.07916	-1.2376	-1.55063	4.85873	2.09145	5.08127	4.59748	-1.11174	2.90536	3.70231	-1.4164	4.39456	-1.13091	-1.02947	5.15436	5.5592	2.76234	-1.04535	4.82981	5.9042	4.33309	3.94973	4.62058	3.83696	2.28507	5.53677	3.90835	-0.299681	4.32516	4.48696	1.97716	5.34389	4.70621	3.60755	-0.878027	3.12784	1.30542	4.26109
hsa-miR-6773-3p	3.21371	1.21206	9.59837	1.61207e-15	3.04041e-14	24.7526	UP	2.40717	1.10654	1.81624	-1.57134	0.503967	-1.2376	-1.55063	-1.52546	0.890286	2.60769	1.97984	-1.11174	-1.57285	-0.360516	-1.4164	-1.62845	-1.13091	-1.02947	2.80429	1.22721	-1.35138	-1.04535	-0.792648	0.732516	-0.862626	-1.02774	-1.50421	-1.64695	-1.48952	-0.895687	-1.59003	-0.299681	-1.64229	-1.40019	1.64022	-1.68781	-1.47576	-1.5912	-0.878027	-1.39765	-1.4982	-1.2248
hsa-miR-6774-3p	1.8164	0.691475	4.2876	4.4506e-05	0.000167633	1.13706	UP	4.36964	-1.61738	3.00196	-1.57134	-0.874209	-1.2376	-1.55063	3.01742	3.50184	1.62097	-1.30103	3.0674	-1.57285	-0.325335	2.76771	-1.62845	-1.13091	-1.02947	0.164571	-1.66996	4.79222	-1.04535	-0.792648	-1.55614	3.42256	-1.02774	-1.50421	-1.64695	-1.48952	-0.895687	-1.59003	-0.299681	2.41395	-1.40019	-1.72575	-1.68781	-1.47576	-1.5912	-0.878027	-1.39765	2.46643	-1.2248
hsa-miR-6775-3p	2.96066	2.40467	8.08194	2.44602e-12	2.95946e-11	17.4997	UP	-0.802385	1.77833	4.34504	3.63265	2.27422	-1.2376	-1.55063	2.41959	-0.973484	4.06599	-1.30103	3.05477	4.83179	0.0018022	1.58354	-1.62845	3.47162	3.22693	2.05274	-0.258813	4.1634	-1.04535	-0.792648	2.90998	-0.862626	4.16751	-1.50421	-1.64695	-1.48952	-0.895687	-1.59003	-0.299681	-1.64229	2.36133	4.20209	1.60689	4.22433	-1.5912	3.68813	-1.39765	1.61143	-1.2248
hsa-miR-6776-3p	3.89094	2.46922	10.7944	5.01856e-18	1.35501e-16	30.478	UP	2.84316	1.07318	-1.58516	-1.57134	4.68454	-1.2376	-1.55063	3.19118	-0.68939	3.1657	-1.30103	-1.11174	-1.57285	-1.64433	-1.4164	-1.62845	4.01081	-1.02947	-1.68431	0.149654	5.2304	-1.04535	-0.792648	1.59397	4.53661	3.0674	1.51813	0.797038	-1.48952	-0.895687	1.61907	-0.299681	-0.452209	4.63338	4.84376	4.00668	3.83486	-1.5912	-0.878027	-1.39765	1.10126	-1.2248
hsa-miR-6776-5p	1.15923	4.83545	3.42819	0.000911055	0.0025708	-1.72811	UP	5.33492	4.61148	3.34268	4.9814	5.14538	5.56173	3.82482	4.58954	4.28593	5.51466	3.85838	4.39456	5.1869	5.24621	5.62037	4.99551	-1.13091	3.45734	5.60142	4.36103	4.64236	-1.04535	4.93041	4.78573	3.49273	5.70793	6.0373	5.30288	5.69012	-0.895687	5.83114	-0.299681	-0.410275	4.72469	5.09605	5.07916	5.72135	4.72855	5.01521	5.49879	4.95114	3.76212
hsa-miR-6777-3p	1.28427	5.19334	4.97051	3.08139e-06	1.44493e-05	3.71199	UP	4.96342	5.70507	-1.58516	4.76525	5.11516	3.90575	1.59796	5.42101	3.91457	5.65225	5.18178	5.9344	5.4112	5.12412	5.09192	2.34807	-1.13091	3.14779	4.77593	2.04287	4.49475	4.58954	5.16924	4.11905	5.78281	4.34893	5.02166	5.3624	4.78213	4.90246	4.57736	5.79335	5.35727	5.12412	6.22513	5.9344	5.37645	2.1264	5.24823	5.56173	5.5043	5.79621
hsa-miR-6778-3p	3.36426	1.89851	8.86936	5.50287e-14	8.93346e-13	21.2544	UP	2.68346	1.53657	-1.58516	2.92004	2.38996	-1.2376	-1.55063	-1.52546	3.70001	6.0798	-1.30103	3.57491	1.81624	-1.64433	-1.4164	-1.62845	3.91954	-1.02947	-1.68431	4.65613	1.97984	-1.04535	-0.792648	2.53707	-0.862626	-1.02774	-1.50421	-0.550824	-1.48952	-0.895687	2.50442	-0.299681	-1.64229	2.5316	3.10982	2.36929	-1.47576	-1.5912	-0.878027	-1.39765	-1.4982	-1.2248
hsa-miR-6779-3p	2.72119	3.04647	6.80003	1.03392e-09	9.14486e-09	11.5345	UP	-0.190736	4.40821	1.85033	4.41357	3.24926	-1.2376	1.72496	1.35786	-0.136841	3.27738	2.58927	-1.11174	1.06078	2.68052	-1.4164	3.62726	-1.13091	-1.02947	4.21021	4.44496	-1.35138	3.70231	4.94344	3.77588	4.7991	-1.02774	-1.50421	-1.64695	-1.48952	4.44701	1.66545	5.0237	-1.64229	3.75333	0.958802	3.77166	2.69941	-1.5912	-0.878027	2.95053	4.0404	2.56656
hsa-miR-6780a-3p	3.23657	0.700091	10.4237	2.98494e-17	7.29179e-16	28.7089	UP	-1.62697	-1.61738	1.19333	1.18008	-0.340154	-1.2376	-1.55063	-1.52546	-1.67249	-0.0590659	-1.30103	-1.11174	-1.57285	-1.64433	-1.4164	-1.62845	-1.13091	-1.02947	-1.68431	2.09735	-1.35138	-1.04535	-0.792648	-1.55614	-0.862626	-1.02774	-1.50421	-1.64695	-1.48952	-0.895687	0.915956	-0.299681	-1.64229	-1.40019	2.12198	0.707022	-1.47576	-1.5912	-0.878027	-1.39765	-1.4982	-1.2248
hsa-miR-6780a-5p	1.64685	3.16559	3.94112	0.000157995	0.000533937	-0.073019	UP	1.36522	4.13119	4.67213	4.85873	4.42716	-1.2376	-1.55063	2.19112	3.21507	5.00664	3.90121	-1.11174	2.31082	4.16947	-1.4164	4.04535	3.83486	3.63265	4.17352	5.21668	-1.35138	-1.04535	3.83907	3.75095	3.43766	-1.02774	1.82996	4.21816	4.30164	7.63946	-1.59003	5.14043	2.30168	-1.40019	4.29757	4.85873	-1.47576	4.51246	-0.878027	3.45734	5.14921	4.36318
hsa-miR-6780b-3p	1.22588	3.92104	3.7857	0.000273042	0.000866774	-0.59242	UP	2.76234	4.52625	4.51246	3.64018	4.17751	3.11787	5.53384	4.6246	5.13857	5.66751	4.80516	3.74231	4.36532	2.44545	3.37599	1.18008	-1.13091	-1.02947	2.68052	5.38632	4.19962	5.39167	-0.792648	-1.55614	-0.862626	-1.02774	3.71041	1.88126	3.11787	3.24132	4.99974	5.57251	5.84262	3.04167	4.45134	3.91095	5.43558	1.2017	3.97343	5.16669	4.0822	4.9814
hsa-miR-6781-3p	1.05947	0.626171	2.70354	0.00817316	0.0175432	-3.75304	UP	-1.57973	1.9481	4.15513	1.91363	2.02422	-1.2376	-1.55063	-1.52546	0.56533	3.0674	-1.30103	-1.11174	-1.57285	-0.266813	-1.4164	3.81834	4.81153	-1.02947	-1.68431	-1.66996	-1.35138	-1.04535	-0.792648	1.62548	-0.862626	-1.02774	2.15948	1.84452	-1.48952	-0.895687	-1.59003	-0.299681	2.69412	-1.40019	0.695846	-0.471846	-1.47576	-1.5912	-0.878027	-1.39765	1.77188	-1.2248
hsa-miR-6781-5p	1.02756	9.93316	14.1087	1.00035e-24	9.16394e-23	45.787	UP	10.0433	9.50516	9.62142	9.33621	10.1715	9.21022	8.96025	9.64725	9.53385	9.45357	9.40156	9.81192	9.67509	9.47933	9.35637	9.28653	9.73687	9.47933	9.21022	9.42808	9.47933	9.47933	10.3752	10.0864	9.64725	9.42808	9.04401	9.14214	8.64662	9.31216	9.38092	9.53385	9.28653	9.40156	9.21022	9.23212	9.67509	9.28653	9.16725	9.23212	9.31216	9.07915
hsa-miR-6782-3p	2.40755	2.77208	5.92562	5.36241e-08	3.48217e-07	7.6591	UP	4.7043	2.11468	5.15436	1.63151	2.76234	-1.2376	-1.55063	4.14305	0.74067	3.64257	2.8284	3.51322	3.14779	-1.64433	-1.4164	2.35653	-1.13091	3.49018	2.13904	-1.66996	4.24053	-1.04535	-0.792648	4.33309	4.41357	-1.02774	-1.50421	0.0142747	-1.48952	-0.895687	4.1171	4.43787	1.29599	2.53707	2.78158	3.81377	-1.47576	-1.5912	-0.878027	-1.39765	3.69771	-1.2248
hsa-miR-6783-3p	3.12981	1.50623	8.25099	1.08659e-12	1.42199e-11	18.3021	UP	-1.64575	-1.61738	3.64677	-1.57134	0.722275	-1.2376	2.43171	-1.52546	1.23001	2.5269	-1.30103	-1.11174	-1.57285	2.95053	-1.4164	-1.62845	-1.13091	-1.02947	1.57328	2.7853	4.10831	-1.04535	-0.792648	-1.55614	-0.862626	-1.02774	-1.50421	-1.64695	-1.48952	-0.895687	3.20803	-0.299681	-1.64229	3.55618	4.30735	0.250549	2.30403	-1.5912	-0.878027	-1.39765	-1.4982	-1.2248
hsa-miR-6784-3p	1.8375	3.73254	5.08852	1.90242e-06	9.31243e-06	4.17972	UP	2.00071	5.16414	2.99292	5.53384	4.81749	-1.2376	2.42159	2.5642	2.3882	4.21205	4.82802	3.83696	3.84295	3.06265	-1.4164	3.3567	4.21021	3.39914	0.968879	-0.458165	5.4264	2.80746	-0.792648	3.91095	-0.862626	4.44907	-1.50421	3.93115	-1.48952	4.13693	4.39456	6.17856	3.48763	5.13671	4.82623	3.78465	4.41357	3.70231	4.44009	4.3036	-1.4982	2.66055
hsa-miR-6784-5p	1.59788	11.7733	19.0897	9.69465e-34	3.10835e-31	66.3161	UP	11.0816	11.4553	10.7434	10.852	11.7688	10.7779	10.7779	11.0266	10.852	10.4343	10.8929	10.8929	11.0816	10.3752	10.8158	10.8158	11.0266	10.852	10.9764	11.0816	11.1624	10.6687	11.7688	11.4553	10.9764	10.852	10.8929	11.1624	10.852	10.7434	11.0816	10.6687	10.7434	11.5144	10.9305	11.1223	11.5144	11.354	11.2075	11.0816	11.1624	10.9764
hsa-miR-6785-5p	1.26227	8.53316	12.3521	3.11357e-21	1.37695e-19	37.8074	UP	8.09745	7.52593	8.64662	8.46324	7.49043	7.83932	7.92502	8.0401	7.8257	8.14455	8.14455	7.93879	8.01854	7.96987	8.11321	8.22365	8.3334	7.86601	8.42824	7.83932	8.46324	8.26824	7.75451	7.75451	7.95247	8.44376	8.42824	8.15984	8.01125	8.38262	7.63946	7.37975	7.54841	7.78429	8.26824	8.20935	7.91726	7.78429	7.86601	7.78429	8.08349	7.66471
hsa-miR-6786-3p	2.82874	3.5582	7.2764	1.12331e-10	1.13806e-09	13.7209	UP	3.79535	4.4536	1.82044	1.09566	4.83758	-1.2376	-1.55063	1.61143	4.39029	4.52625	4.88078	3.64677	0.806187	0.117044	2.69941	-1.62845	2.99526	4.28789	-1.23676	4.69985	3.54579	3.24132	-0.792648	1.45715	4.21816	4.89205	-1.50421	0.77011	2.42704	-0.895687	5.28542	4.7579	1.9424	-1.40019	4.66082	4.20836	4.34504	2.31832	3.60755	2.72225	-1.4982	-1.2248
hsa-miR-6787-3p	3.39582	2.47962	9.61005	1.52346e-15	2.89457e-14	24.8086	UP	0.808703	1.84213	1.5099	1.58511	0.920505	-1.2376	-1.55063	1.76451	2.69941	3.70231	-1.30103	-1.11174	-1.57285	4.28985	2.05964	2.49177	3.44002	-1.02947	-0.349319	4.74888	-1.35138	-1.04535	-0.792648	-1.55614	4.22813	-1.02774	-1.50421	-1.64695	1.22442	3.21507	1.87164	-0.299681	-0.206033	-1.40019	2.8284	1.29235	-1.47576	-1.5912	-0.878027	-1.39765	5.4137	3.83907
hsa-miR-6787-5p	-1.60867	9.17028	-14.4134	2.57071e-25	2.74745e-23	47.1342	DOWN	9.21022	9.64725	9.16725	10.2552	9.53385	10.5571	9.92015	9.88389	9.67509	9.31216	9.07915	8.75704	9.96364	10.1715	9.81192	9.77368	9.34629	9.14214	11.1624	10.9764	10.2552	9.73687	9.72253	10.0433	8.8637	11.0816	11.0816	10.3752	9.84619	9.42808	10.2934	9.62142	9.56193	10.0013	10.2552	9.7082	10.3752	10.3752	11.4032	10.6687	9.77368	9.1904
hsa-miR-6788-3p	3.51013	1.79664	10.2121	8.28072e-17	1.91352e-15	27.6967	UP	3.67823	1.3183	-1.58516	5.14538	2.0332	-1.2376	-1.55063	-1.52546	0.164571	0.170846	-1.30103	-1.11174	1.31213	0.235571	-1.4164	2.47834	-1.13091	-1.02947	0.63728	1.89469	-1.35138	-1.04535	-0.792648	3.61462	-0.862626	-1.02774	-1.50421	0.448088	2.32055	-0.895687	0.645945	-0.299681	2.67031	2.04778	3.52753	-0.0965934	-1.47576	-1.5912	-0.878027	-1.39765	1.95998	-1.2248
hsa-miR-6788-5p	1.48275	0.341653	3.8016	0.000258344	0.00082522	-0.539979	UP	-0.578341	-1.61738	-1.58516	0.790385	-1.67742	-1.2376	-1.55063	-1.52546	0.695846	-1.53167	-1.30103	-1.11174	3.24132	-1.64433	-1.4164	-1.62845	-1.13091	-1.02947	-1.68431	4.73053	4.63338	3.30163	-0.792648	-1.55614	-0.862626	-1.02774	-1.50421	-1.64695	2.65555	5.42101	-1.59003	-0.299681	-1.64229	-1.40019	-0.674923	3.33397	-1.47576	-1.5912	-0.878027	-1.39765	3.65654	-1.2248
hsa-miR-6789-3p	2.12002	3.00854	4.97073	3.07867e-06	1.44493e-05	3.71284	UP	4.04287	4.02351	5.04095	4.12252	4.62058	-1.2376	0.758319	4.35881	4.43565	2.90266	2.06629	3.03221	3.72769	4.40391	-1.4164	2.14205	2.97604	-1.02947	2.81844	-1.66996	-1.35138	-1.04535	-0.792648	1.93035	4.9221	-1.02774	-1.50421	2.21975	5.27075	-0.895687	-1.59003	5.2442	2.97371	2.98173	2.99751	-1.68781	3.6039	1.48091	3.28353	-1.39765	-1.4982	-1.2248
hsa-miR-6790-3p	2.18136	4.31094	5.40454	5.09014e-07	2.79576e-06	5.4617	UP	5.70793	5.27075	4.16947	4.82203	5.59032	3.92915	-1.55063	5.53091	5.43558	5.37146	5.86246	5.22546	4.49475	0.312901	4.5591	2.42905	-1.13091	5.2096	0.968879	-1.66996	6.23286	-1.04535	-0.792648	4.77593	5.3195	3.9181	-1.50421	1.54703	1.50096	5.43067	4.60699	-0.299681	4.70812	4.25235	4.65402	4.84556	5.12177	3.77166	-0.878027	3.02289	3.96113	-1.2248
hsa-miR-6790-5p	1.90132	4.51242	5.76094	1.10248e-07	6.717e-07	6.95427	UP	5.2442	5.15884	5.93112	5.78281	5.13671	-1.2376	1.73879	3.84101	5.65827	5.14538	4.14305	4.40106	4.77593	1.05709	5.02788	4.66785	4.7713	3.312	5.2442	0.423022	4.50135	-1.04535	4.35658	4.08657	5.16924	-1.02774	4.07065	4.69587	4.94763	-0.895687	2.17086	-0.299681	5.39673	5.3693	4.37545	5.04095	3.48763	2.0332	4.01956	2.17582	3.84295	4.00015
hsa-miR-6791-3p	1.59354	0.985143	3.77581	0.000282588	0.000892657	-0.624973	UP	-1.47975	3.16182	-1.58516	2.73395	1.70978	-1.2376	1.57569	4.90988	0.722275	-1.74038	1.99477	-1.11174	-1.57285	3.37803	-1.4164	2.42331	-1.13091	4.50348	-1.68431	-0.662198	-1.35138	-1.04535	3.87505	-1.55614	-0.862626	-1.02774	3.82077	-1.64695	4.24053	4.26533	-1.59003	-0.299681	-0.27733	2.63286	3.32364	1.93442	2.02422	-1.5912	-0.878027	-1.39765	-1.4982	-1.2248
hsa-miR-6792-3p	2.52585	3.99277	6.36989	7.38302e-09	5.53726e-08	9.60252	UP	5.09192	5.21185	3.49273	4.22813	4.73716	-1.2376	-1.55063	2.47133	2.44366	5.27075	-1.30103	3.07299	3.70231	1.3183	4.84556	4.09043	4.58954	-1.02947	-1.68431	1.13625	6.61624	2.72225	-0.792648	4.90063	3.90575	4.71637	3.96655	2.44188	1.59796	5.21185	3.70805	-0.299681	-0.608626	4.67413	5.51466	5.23727	4.51246	-1.5912	-0.878027	-1.39765	-1.4982	2.34397
hsa-miR-6793-3p	1.1699	3.41694	3.20905	0.00183434	0.0047719	-2.38119	UP	4.28357	4.864	5.87819	4.09587	3.74453	5.11037	3.7972	4.46426	2.59251	3.8232	5.35273	3.82644	3.2034	4.5506	4.39242	0.944544	4.2753	4.0885	2.73627	-0.887582	-1.35138	3.84502	-0.792648	4.60247	-0.862626	-1.02774	1.68531	3.13998	-1.48952	4.30164	-1.59003	4.83567	1.45956	4.07434	4.26109	4.36748	4.88078	1.85352	-0.878027	-1.39765	4.66785	4.02768
hsa-miR-6794-3p	3.18125	2.52726	7.79659	9.56842e-12	1.09567e-10	16.1518	UP	2.12895	4.0822	5.45105	3.97343	3.48024	-1.2376	0.691099	-1.52546	1.92825	4.17751	-1.30103	3.95368	-1.57285	-1.64433	-1.4164	-1.62845	-1.13091	-1.02947	-0.107659	4.2812	4.11905	-1.04535	-0.792648	3.3193	3.24132	-1.02774	1.95609	-1.64695	3.0363	-0.895687	5.25724	6.20973	0.927033	2.41395	4.68454	-1.68781	2.97137	-1.5912	-0.878027	-1.39765	-1.4982	-1.2248
hsa-miR-6795-3p	1.87581	3.8817	5.20774	1.16209e-06	5.9142e-06	4.65848	UP	0.456571	5.30288	3.0363	1.24918	4.33309	2.64439	-1.55063	2.11035	1.82996	2.18253	4.11515	3.53471	5.09819	4.90488	1.58354	3.87047	4.86852	4.65613	4.31928	4.08657	-1.35138	5.37396	4.41776	2.42159	5.87464	-1.02774	3.04893	1.10654	4.49475	6.43033	-1.59003	-0.299681	5.3106	3.83486	3.81834	3.64677	4.01081	-1.5912	-0.878027	1.67015	5.63131	5.62254
hsa-miR-6796-5p	1.51865	3.57572	4.2664	4.81807e-05	0.000179627	1.06103	UP	3.84709	3.19669	1.15088	4.68036	3.19436	-1.2376	-1.55063	1.2728	3.56125	3.39695	3.94973	3.86581	3.90121	1.27013	3.3193	3.54315	3.69771	4.28789	1.53657	4.32888	4.53457	-1.04535	5.29646	5.06629	3.38938	4.9977	2.91714	2.4051	3.80497	-0.895687	4.21205	-0.299681	2.19831	2.79957	2.6184	4.80516	-1.47576	3.57992	-0.878027	3.90575	5.3624	4.763
hsa-miR-6797-3p	1.37772	4.1741	3.97761	0.000138678	0.00047241	0.0510962	UP	3.37069	5.06815	5.05182	4.87295	4.84556	3.53471	4.05682	4.69985	4.46007	2.38538	-1.30103	-1.11174	3.87047	2.35445	4.51246	1.48091	5.06179	4.9221	4.19962	0.732516	-1.35138	3.89259	-0.792648	5.15884	5.59536	-1.02774	2.34807	4.98533	4.73932	5.13671	5.21185	4.75389	5.19348	4.864	5.05182	4.74888	1.60689	4.67824	4.42279	-1.39765	2.25984	5.10547
hsa-miR-6799-3p	2.09503	1.82851	5.01825	2.53695e-06	1.20729e-05	3.90047	UP	1.19752	2.61616	3.73177	4.55407	1.48091	-1.2376	4.40821	1.89271	-1.67249	0.785505	-1.30103	-1.11174	-1.57285	-1.64433	-1.4164	-1.62845	-1.13091	-1.02947	0.722275	0.554286	2.34602	-1.04535	-0.792648	-1.55614	4.09043	-1.02774	2.79604	2.04287	5.13188	-0.895687	1.58354	-0.299681	-0.323736	4.79703	0.701912	-0.25522	3.11787	3.76212	-0.878027	-1.39765	3.44238	4.12252
hsa-miR-6800-3p	1.00739	5.35585	4.26358	4.86902e-05	0.000181001	1.05095	UP	4.63807	6.05657	5.65827	5.43558	5.34827	5.21185	5.00178	5.07916	4.20209	5.03182	4.62696	5.5043	4.35479	-1.64433	4.87073	3.33179	4.96342	5.83114	5.34164	2.13326	4.89462	2.90998	4.54048	5.09192	5.33492	5.11516	5.9842	5.37875	6.00333	3.51548	5.33051	-0.299681	5.38632	6.15278	6.02871	5.54441	5.94475	5.61329	4.50348	5.15884	5.08338	5.3624
hsa-miR-6800-5p	1.46314	8.28372	12.9601	1.85149e-22	1.10443e-20	40.6081	UP	8.0401	8.08349	6.67492	7.88022	8.09745	7.00315	7.63946	7.8257	7.66471	6.62673	6.99204	7.63946	8.12145	7.05858	7.62741	7.70108	6.7822	7.52593	8.03296	7.60037	7.42968	7.48435	8.38262	7.79764	7.29533	8.11321	8.5151	7.79764	7.44288	6.42208	8.3153	5.36714	7.15402	8.02582	7.57286	7.58608	7.8257	8.26824	7.31996	8.01125	7.49043	7.67475
hsa-miR-6801-5p	1.02379	0.46729	2.22453	0.0285609	0.0514818	-4.86621	UP	3.67199	-1.61738	3.85398	1.92169	-1.67742	-1.2376	-1.55063	-1.52546	-1.67249	-1.74038	-1.30103	-1.11174	-1.57285	-0.21022	2.11468	-1.62845	-1.13091	-1.02947	3.03898	4.04895	-1.35138	-1.04535	6.62673	2.48315	-0.862626	-1.02774	4.27735	1.53295	-1.48952	-0.895687	-1.59003	-0.299681	-1.64229	-1.40019	3.15406	-1.68781	-1.47576	0.597286	-0.878027	-1.39765	-1.4982	-1.2248
hsa-miR-6802-3p	1.95208	3.83345	5.68572	1.528e-07	9.20031e-07	6.6354	UP	3.83486	4.06097	4.01956	2.3771	0.992874	-1.2376	0.890286	1.33604	3.19118	4.26109	4.81749	3.16376	1.32944	3.39475	4.73251	4.37741	4.85024	4.60473	2.45353	4.65613	3.95755	6.15647	-0.792648	4.7452	4.053	-1.02774	-1.50421	4.13895	-1.48952	-0.895687	4.93288	4.66341	5.8372	-1.40019	4.53865	4.50727	3.61108	1.72868	-0.878027	4.54232	3.81605	2.27046
hsa-miR-6803-3p	1.85766	4.25849	5.14592	1.50155e-06	7.47862e-06	4.40947	UP	4.0589	5.33051	5.24823	3.23241	5.42101	-1.2376	-1.55063	3.8797	1.97984	4.51246	-1.30103	4.4536	4.72855	2.6399	3.94143	1.09846	3.56989	4.32321	2.89996	4.64627	2.35237	5.11037	-0.792648	5.25724	5.38632	-1.02774	3.27034	4.54232	-1.48952	5.43558	3.83486	5.50931	5.51466	4.60699	5.15884	3.42507	4.33711	-1.5912	4.02768	1.87667	4.763	4.68036
hsa-miR-6804-3p	2.65591	3.97803	6.69167	1.70294e-09	1.45117e-08	11.0437	UP	4.01491	5.40663	2.62788	1.10654	4.11024	-1.2376	-1.55063	4.64021	5.32587	4.33711	4.63807	3.61462	-1.57285	-1.64433	1.73373	4.07912	-1.13091	4.17144	5.2941	5.81844	3.49273	-1.04535	-0.792648	5.72135	4.92644	-1.02774	2.35653	4.72469	4.36532	-0.895687	1.8567	-0.299681	3.41834	4.83758	5.02985	1.91586	4.08438	4.053	-0.878027	4.50135	4.54855	-1.2248
hsa-miR-6805-5p	1.02405	10.7492	12.7209	5.59468e-22	2.92864e-20	39.5108	UP	10.7434	10.5955	10.9117	9.88389	10.6687	9.67509	9.73687	10.2552	10.4861	10.1715	10.419	10.9305	10.3314	10.3314	10.124	10.2119	10.852	10.6687	9.88389	10.3314	10.4497	10.3314	11.0266	11.3067	10.2934	9.88389	9.64725	9.84619	9.67509	10.0013	10.3314	10.5763	10.419	10.3314	10.419	10.124	10.4861	10.0864	9.84619	9.84619	10.0013	10.0864
hsa-miR-6809-3p	3.26018	2.06354	8.60532	1.97118e-13	2.97417e-12	19.9911	UP	-0.887582	2.07667	0.767214	3.35285	-1.67742	-1.2376	3.04167	3.0674	-1.67249	-0.588604	-1.30103	-1.11174	1.07626	-1.64433	2.11035	-1.62845	-1.13091	-1.02947	-1.68431	-1.66996	-1.35138	4.70812	-0.792648	0.998341	-0.862626	-1.02774	2.00985	1.07935	-1.48952	-0.895687	3.47445	4.58526	3.02289	-1.40019	3.07299	2.09735	-1.47576	-1.5912	-0.878027	4.36748	-1.4982	-1.2248
hsa-miR-6810-3p	2.58708	3.13827	6.674	1.84686e-09	1.55614e-08	10.9639	UP	2.51198	4.68245	1.78054	2.36133	4.48696	-1.2376	4.26533	4.53865	4.09829	4.8988	-1.30103	3.33615	0.587022	3.21841	3.34268	-1.62845	-1.13091	-1.02947	2.97604	5.22793	4.34893	4.0885	-0.792648	3.71288	-0.862626	-1.02774	-1.50421	4.81749	-1.48952	-0.895687	1.57087	4.8988	5.13188	-1.40019	1.60336	3.71041	4.07434	0.464308	-0.878027	3.99358	4.37156	2.40924
hsa-miR-6810-5p	1.23804	3.87429	3.53965	0.000630907	0.00183478	-1.38316	UP	4.96822	2.49177	3.64257	4.34504	4.22029	3.1657	3.47162	3.96456	3.64886	5.22546	5.00421	-1.11174	5.38632	3.63265	4.55234	4.15952	3.85204	-1.02947	4.87703	0.616505	-1.35138	3.18133	-0.792648	4.71235	3.80931	3.2562	2.97371	4.90246	3.85204	3.90121	5.56173	-0.299681	2.3086	-1.40019	3.85204	3.94973	4.58526	-1.5912	5.22174	5.65827	4.43089	2.29001
hsa-miR-6812-3p	2.33713	2.18627	5.45892	4.0419e-07	2.27647e-06	5.68636	UP	2.28754	0.695846	2.24268	2.02624	2.88748	-1.2376	-1.55063	-1.52546	5.4264	-0.38589	2.8933	4.2481	3.81377	4.01956	-1.4164	-1.62845	-1.13091	-1.02947	-1.68431	4.39456	-1.35138	-1.04535	5.78769	5.12796	5.23948	-1.02774	-1.50421	1.96377	-1.48952	3.61108	-1.59003	-0.299681	2.11879	-1.40019	4.02768	3.84709	-1.47576	1.74201	-0.878027	-1.39765	5.07468	-1.2248
hsa-miR-6813-3p	1.66771	4.3587	5.19101	1.24576e-06	6.30251e-06	4.59091	UP	4.41776	5.33938	4.68245	4.87703	4.75389	3.70569	4.44009	3.46691	4.37545	3.38007	2.65293	3.98303	0.908879	3.84709	3.45734	4.10831	4.40391	4.34136	4.17352	0.752593	-1.35138	4.58954	5.4162	4.98921	5.49879	-1.02774	4.01724	4.63573	-1.48952	-0.895687	5.69608	5.22546	5.68685	4.53081	5.17936	4.84196	3.13725	2.93758	3.72769	-1.39765	4.02351	3.5252
hsa-miR-6813-5p	2.55943	5.1144	7.35928	7.60546e-11	7.83454e-10	14.1055	UP	5.33051	4.78573	-1.58516	3.12784	5.58468	-1.2376	-1.55063	3.59531	4.82413	4.92842	4.68633	5.90878	4.01491	0.483407	4.03693	-1.62845	4.08066	5.70221	4.23237	5.75103	4.98921	4.45684	5.99582	5.75765	5.84262	-1.02774	4.98727	4.92644	4.60699	4.60699	5.60716	5.97295	5.23505	4.7579	5.30546	5.20735	3.18133	2.80429	3.77166	2.11035	5.33492	3.99593
hsa-miR-6814-3p	1.99458	1.45399	4.61484	1.27176e-05	5.32149e-05	2.34148	UP	3.56602	1.0534	5.2304	-1.57134	1.11385	-1.2376	-1.55063	1.91363	4.65009	3.7401	3.33942	-1.11174	-1.57285	-1.64433	-1.4164	4.59748	-1.13091	-1.02947	2.8402	-1.66996	3.22432	3.26537	-0.792648	3.81377	5.26003	-1.02774	-1.50421	-0.376516	-1.48952	-0.895687	2.72903	-0.299681	1.64451	-1.40019	0.107275	-0.965341	-1.47576	-1.5912	-0.878027	-1.39765	2.06241	-1.2248
hsa-miR-6815-3p	1.60536	0.724184	3.67512	0.000399586	0.00121871	-0.952664	UP	2.55162	3.36385	-1.58516	-1.57134	0.743418	-1.2376	1.03745	-1.52546	-1.67249	-1.74038	2.89996	-1.11174	-1.57285	-0.188736	2.64662	-1.62845	-1.13091	-1.02947	-1.68431	-1.66996	-1.35138	-1.04535	-0.792648	-1.55614	-0.862626	-1.02774	2.15948	0.840209	-1.48952	-0.895687	-1.59003	-0.299681	3.7888	7.45669	-0.329198	4.67413	-1.47576	4.41357	-0.878027	1.82436	-1.4982	-1.2248
hsa-miR-6815-5p	1.05535	4.68335	3.9168	0.000172268	0.000577605	-0.15527	UP	5.52245	4.52151	5.80519	4.60699	5.43067	4.79703	9.23212	5.96637	4.44907	3.82644	4.39456	4.44009	3.29182	2.92525	4.68454	5.65225	5.25724	4.65009	2.19471	-0.412648	2.73627	3.13725	3.48321	5.28542	5.28078	3.72769	5.44298	4.71637	3.15579	4.38178	4.65402	-0.299681	5.53091	4.40391	4.93941	4.69265	4.11515	2.72225	3.67823	2.51805	5.37875	3.35058
hsa-miR-6817-3p	1.94696	0.591967	5.99082	4.02218e-08	2.66587e-07	7.94059	UP	0.554286	1.57087	-1.58516	-1.57134	1.14479	-1.2376	3.34268	1.3677	0.360077	-1.58525	-1.30103	-1.11174	-1.57285	-1.64433	-1.4164	-1.62845	-1.13091	-1.02947	-1.68431	-1.66996	-1.35138	-1.04535	-0.792648	1.81624	-0.862626	-1.02774	1.87897	-1.64695	1.71555	-0.895687	2.84912	-0.299681	-1.64229	-1.40019	2.20943	-1.19271	3.2562	1.47338	-0.878027	2.14205	1.37555	-1.2248
hsa-miR-6819-3p	1.25068	3.90404	3.51534	0.000683977	0.00196461	-1.45909	UP	5.3218	5.37146	4.46897	0.674571	5.29646	4.81153	2.46123	2.59251	2.60512	0.423022	3.8797	5.03863	4.53269	5.44298	-1.4164	2.88124	-1.13091	-1.02947	3.39207	-1.66996	2.10057	5.47125	4.44252	4.13491	5.17397	-1.02774	4.50727	5.19348	2.0843	-0.895687	4.98727	6.4928	5.50931	5.11037	3.84502	4.88078	4.18352	2.62262	3.33615	-1.39765	3.90121	4.33309
hsa-miR-6820-3p	2.70611	2.82649	6.9466	5.24499e-10	4.82201e-09	12.2025	UP	2.39173	3.59754	4.98533	-1.57134	4.27735	-1.2376	-1.55063	-1.52546	-0.54256	0.688115	-1.30103	4.60247	-1.57285	3.20803	2.15442	4.19143	2.7853	-1.02947	3.49273	2.42905	2.5269	-1.04535	5.89963	3.72769	-0.862626	-1.02774	-1.50421	3.60755	-1.48952	-0.895687	4.36964	-0.299681	2.08243	3.50599	3.65654	2.37551	-1.47576	2.64439	-0.878027	-1.39765	5.72135	-1.2248
hsa-miR-6821-3p	1.66779	1.52588	3.69285	0.000376098	0.00115948	-0.895432	UP	2.7853	1.30542	-1.58516	-1.57134	3.09825	3.76453	1.47624	1.97984	1.86221	-1.59163	-1.30103	-1.11174	-1.57285	-1.64433	-1.4164	-1.62845	-1.13091	-1.02947	4.93536	-1.00222	2.01438	4.58954	-0.792648	3.62309	4.65009	-1.02774	-1.50421	1.2387	-1.48952	-0.895687	2.30638	-0.299681	5.2236	3.5724	-1.24929	-1.40859	-1.47576	-1.5912	-0.878027	-1.39765	-1.4982	2.57271
hsa-miR-6822-3p	1.70328	0.761939	3.86197	0.000209111	0.00067895	-0.33941	UP	2.44366	1.58511	4.78996	-1.57134	1.07318	-1.2376	-1.55063	2.11879	4.1634	-0.737418	-1.30103	-1.11174	1.77612	-1.64433	-1.4164	5.43067	-1.13091	-1.02947	-1.23084	-1.66996	3.84295	-1.04535	-0.792648	-1.55614	-0.862626	-1.02774	-1.50421	1.39509	-1.48952	-0.895687	-1.59003	-0.299681	-1.64229	-1.40019	3.36188	-0.940055	-1.47576	-1.5912	-0.878027	-1.39765	2.06629	-1.2248
hsa-miR-6822-5p	-1.39606	5.16149	-6.12029	2.26405e-08	1.5653e-07	8.50349	DOWN	5.57881	5.07468	5.76473	5.7392	6.20085	5.77757	4.01286	6.41637	5.86836	4.94553	4.80959	3.96285	6.22899	5.34827	5.70793	6.36559	5.07468	5.29882	6.98067	4.89671	4.88078	6.32925	6.27005	6.33999	5.57251	5.9344	6.11895	6.57651	5.53384	5.33492	6.82007	6.88421	6.13509	5.62254	4.87703	5.96637	6.23286	6.11895	5.80779	6.3076	5.86836	5.64678
hsa-miR-6823-3p	2.33297	3.03714	5.31402	7.45454e-07	3.93434e-06	5.09027	UP	3.34268	3.81605	4.51676	1.96377	4.40606	-1.2376	1.54296	5.07468	0.124615	0.378418	4.65824	4.84376	0.665824	-1.64433	1.60689	-1.62845	-1.13091	-1.02947	-1.10248	-1.66996	-1.35138	5.45567	-0.792648	3.56125	4.76751	-1.02774	4.03248	4.01081	-1.48952	4.7559	3.81605	-0.299681	3.45734	5.73054	4.72855	3.77588	3.52753	4.10071	-0.878027	-1.39765	-1.4982	2.39173
hsa-miR-6824-3p	2.47645	1.97666	5.86347	7.0457e-08	4.47332e-07	7.39201	UP	1.54513	3.7401	-1.58516	-1.57134	1.56813	-1.2376	1.91586	5.06179	-1.67249	3.54826	-1.30103	3.66297	0.534703	0.23044	-1.4164	3.75724	-1.13091	-1.02947	-1.68431	-1.66996	5.93768	-1.04535	-0.792648	2.11252	3.34831	-1.02774	2.13149	-1.64695	-1.48952	-0.895687	4.80959	-0.299681	3.12209	4.09043	3.86814	-1.37842	2.67031	-1.5912	3.52986	1.95035	-1.4982	-1.2248
hsa-miR-6825-3p	1.35602	5.034	4.27259	4.70788e-05	0.000176031	1.0832	UP	5.25724	5.79335	6.09126	5.48835	5.74471	4.11515	4.28357	4.83376	5.56428	3.33615	4.34504	5.76473	5.06815	1.81212	5.28542	4.50135	5.54441	5.86246	5.13857	-1.66996	3.80497	-1.04535	-0.792648	5.81844	4.62931	3.71875	3.85204	4.98533	3.50184	5.5592	5.1473	-0.299681	4.94344	5.84947	5.61329	5.39167	5.34389	4.27324	-0.878027	5.08698	4.88556	5.48179
hsa-miR-6825-5p	2.52869	6.43292	12.8842	2.62726e-22	1.53157e-20	40.2609	UP	6.11895	6.11156	2.49177	6.18622	5.57251	6.2739	4.42716	5.8104	6.29226	6.38135	5.68357	5.48179	5.61329	3.80303	5.73312	5.28078	6.14173	6.10435	6.15647	4.54232	6.20973	4.49922	-0.792648	5.67738	6.09448	5.35727	6.28467	5.78281	4.763	4.77593	5.77132	5.89963	3.47727	4.81346	5.92464	5.13188	5.75103	4.9073	5.84947	6.06074	4.89462	4.60247
hsa-miR-6826-3p	2.819	3.31103	7.22312	1.44257e-10	1.42864e-09	13.4743	UP	1.70204	4.11216	5.06629	4.51676	3.46691	-1.2376	3.9181	-1.52546	3.97583	4.49475	-1.30103	3.17466	1.90726	4.2812	-1.4164	0.895473	-1.13091	-1.02947	2.8402	5.01521	3.5724	4.37741	4.06599	3.27386	-0.862626	-1.02774	4.353	3.95562	1.3472	4.51461	2.27046	-0.299681	5.11516	2.44188	5.46637	-0.930714	3.25203	-1.5912	3.43766	-1.39765	-1.4982	-1.2248
hsa-miR-6827-3p	3.40913	1.46467	11.062	1.39243e-18	4.11875e-17	31.7503	UP	-0.239374	-1.61738	0.685132	3.18799	3.96113	-1.2376	2.5269	-1.52546	-1.67249	0.360077	-1.30103	-1.11174	-1.57285	1.08377	2.41576	1.37287	-1.13091	-1.02947	-1.68431	-1.66996	-1.35138	-1.04535	4.20836	-1.55614	-0.862626	-1.02774	2.02624	2.97604	-1.48952	-0.895687	1.46875	-0.299681	-0.234308	-1.40019	0.0724396	-1.37087	-1.47576	-1.5912	-0.878027	-1.39765	-1.4982	2.35653
hsa-miR-6827-5p	2.64456	3.90827	7.47929	4.31632e-11	4.63237e-10	14.6644	UP	4.95574	3.91457	3.44002	3.35929	4.01491	-1.2376	-1.55063	4.65009	1.37555	4.81749	3.84295	-1.11174	4.22029	3.04167	4.06097	0.604099	4.51461	-1.02947	2.32436	6.28467	4.55407	3.42256	-0.792648	3.97823	-0.862626	3.38725	4.84196	2.14055	3.97823	5.87464	3.73622	-0.299681	-0.269	3.704	5.50931	2.23929	3.87276	0.823099	-0.878027	-1.39765	3.21841	3.30551
hsa-miR-6829-3p	2.62666	2.57266	5.8406	7.78772e-08	4.87208e-07	7.29408	UP	3.74856	4.15513	5.37146	4.34893	4.36532	-1.2376	-1.55063	1.93238	2.69035	-0.746143	-1.30103	-1.11174	-1.57285	1.26198	-1.4164	1.72868	3.72325	-1.02947	3.71041	-1.66996	-1.35138	4.23631	3.83049	4.52151	-0.862626	-1.02774	3.38938	2.8786	3.65096	-0.895687	-1.59003	-0.299681	4.87073	3.49273	3.61108	1.85033	-1.47576	1.34189	-0.878027	-1.39765	-1.4982	-1.2248
hsa-miR-6830-3p	3.50575	1.88572	8.97659	3.27545e-14	5.3856e-13	21.7682	UP	1.79538	-1.61738	4.05491	5.70221	0.597286	-1.2376	-1.55063	-1.52546	4.42279	-0.202989	-1.30103	-1.11174	-1.57285	0.252978	-1.4164	1.89469	-1.13091	-1.02947	0.0771099	-1.66996	3.42045	4.57938	-0.792648	1.53476	3.70231	-1.02774	-1.50421	-1.64695	-1.48952	-0.895687	1.55254	-0.299681	5.01102	-1.40019	-0.437286	-1.68781	-1.47576	-1.5912	-0.878027	-1.39765	1.45107	-1.2248
hsa-miR-6831-5p	2.73916	4.55188	7.39941	6.29458e-11	6.61705e-10	14.2922	UP	5.12177	4.67213	5.01521	6.85357	4.51676	5.93112	4.39638	4.87703	5.26281	7.65198	2.27919	4.02351	-1.57285	0.707022	2.26453	3.82482	4.35658	3.55346	4.28985	-0.907615	3.5724	-1.04535	-0.792648	5.3195	4.00015	-1.02774	3.18133	2.3339	-1.48952	3.56125	5.45567	5.81844	5.18178	4.21604	4.37545	3.49985	3.01327	1.61736	-0.878027	3.47162	2.82168	-1.2248
hsa-miR-6833-3p	1.45383	3.1341	3.63766	0.000453875	0.00136322	-1.07292	UP	1.83974	2.05274	3.2886	4.60247	0.840209	-1.2376	-1.55063	6.20085	4.64021	3.34268	2.57635	4.11905	-1.57285	5.05182	3.25203	3.06502	-1.13091	4.94142	-1.68431	2.5316	1.8567	5.53091	4.47346	-1.55614	-0.862626	5.27545	3.86085	-0.31878	3.32885	-0.895687	1.35236	-0.299681	1.79342	4.56421	4.08657	4.73716	2.41758	2.97604	5.25267	3.34268	1.72496	-1.2248
hsa-miR-6833-5p	1.1369	1.34557	2.42962	0.0170583	0.0331726	-4.41284	UP	5.05674	-1.61738	-1.58516	-1.57134	1.04605	-1.2376	3.75724	4.90063	0.222615	2.91423	-1.30103	-1.11174	4.45134	-1.64433	5.32587	2.00302	-1.13091	-1.02947	2.69941	3.83049	-1.35138	-1.04535	-0.792648	-1.55614	-0.862626	3.00416	1.83974	2.65031	4.01491	-0.895687	2.65293	-0.299681	-1.64229	-1.40019	2.98173	2.55162	-1.47576	4.93941	-0.878027	-1.39765	-1.4982	-1.2248
hsa-miR-6834-3p	1.44129	3.41465	3.92134	0.000169516	0.000569122	-0.139958	UP	0.989956	3.34831	0.758319	4.353	4.63338	3.38938	3.31723	4.24601	-1.67249	4.0404	-1.30103	-1.11174	-1.57285	-0.228451	4.1047	4.74888	5.19154	3.41834	5.80519	3.72769	4.70207	2.97137	4.59748	-1.55614	-0.862626	3.86581	4.58526	3.20803	4.64236	-0.895687	5.5196	-0.299681	5.07692	4.55407	4.84376	3.15579	1.99003	0.977846	4.91247	3.66092	2.5269	2.61026
hsa-miR-6835-5p	1.00211	3.73728	2.80588	0.00612498	0.0136971	-3.49109	UP	3.61108	3.3567	2.6184	3.3259	4.71024	-1.2376	5.13857	2.30403	1.48495	5.4454	5.27545	5.8372	5.26281	5.62874	4.40821	3.89673	5.43558	4.43089	4.21021	2.08056	4.28985	-1.04535	-0.792648	3.33397	4.72662	4.11905	4.22433	3.46691	1.61907	-0.895687	4.06599	-0.299681	4.5679	2.95949	5.36714	4.37741	4.65613	2.99975	5.17397	4.60247	4.0885	5.11516
hsa-miR-6837-5p	1.66159	3.3466	3.89573	0.000185625	0.000615949	-0.226249	UP	3.65654	4.25675	0.995791	2.08243	5.71452	-1.2376	1.73373	2.6184	4.39456	-0.340154	-1.30103	3.2886	3.32137	2.59977	-1.4164	3.92504	4.75389	-1.02947	4.09043	0.345352	-1.35138	2.8402	4.49922	6.3076	3.49786	4.54232	-1.50421	-0.101758	-1.48952	3.8232	3.97098	-0.299681	4.9977	4.1047	4.17144	4.353	5.06629	-1.5912	-0.878027	2.97604	3.58552	-1.2248
hsa-miR-6838-3p	-1.99565	-0.0696383	-4.97443	3.03271e-06	1.42732e-05	3.72742	DOWN	-0.0886374	0.318516	1.91152	-1.57134	1.25466	4.53865	1.46698	-1.52546	0.652945	-1.51558	4.58954	5.11943	-1.57285	-1.64433	1.81624	-0.224989	3.56989	-1.02947	-0.283802	-1.66996	4.16751	-1.04535	-0.792648	-1.55614	-0.862626	4.04895	3.77377	-1.64695	1.75577	-0.895687	1.70463	-0.299681	-1.64229	5.87464	1.37019	4.32888	3.43064	5.84947	-0.878027	-1.39765	-1.4982	-1.2248
hsa-miR-6839-5p	-1.25424	3.64698	-3.03919	0.00308908	0.00756781	-2.86364	DOWN	4.40821	3.55074	-1.58516	5.4611	4.33309	5.70793	6.69123	5.35273	5.85651	4.76045	5.99958	5.40663	4.21205	5.22546	4.26919	4.33711	5.2096	4.53269	5.25724	4.02768	4.7579	-1.04535	-0.792648	1.86419	-0.862626	4.88556	5.51466	6.31451	5.97295	5.02788	5.84262	-0.299681	-1.64229	6.69642	5.19348	5.44056	5.62564	5.71452	3.36188	5.06629	4.5591	4.4536
hsa-miR-6841-3p	1.31773	1.04704	3.43498	0.000891081	0.00251831	-1.70734	UP	2.56184	2.72225	3.24649	3.24132	0.147286	-1.2376	-1.55063	-1.52546	-0.358725	-1.74038	-1.30103	2.61393	-1.57285	4.46426	3.71041	2.72434	2.74065	-1.02947	1.75144	-1.66996	4.353	-1.04535	-0.792648	-1.55614	-0.862626	-1.02774	1.53657	-0.314242	-1.48952	-0.895687	-1.59003	5.84947	1.66357	-1.40019	3.09211	1.10654	1.4187	2.14851	-0.878027	-1.39765	-1.4982	-1.2248
hsa-miR-6843-3p	1.27477	0.423383	3.46748	0.000801064	0.00227293	-1.60748	UP	-1.36075	1.41426	-1.58516	-1.57134	-0.301363	-1.2376	5.08518	-1.52546	-0.774835	-1.39566	-1.30103	-1.11174	-1.57285	-0.279	-1.4164	-1.62845	-1.13091	-1.02947	-1.68431	1.36319	-1.35138	-1.04535	-0.792648	3.53471	-0.862626	-1.02774	3.72325	2.43823	-1.48952	-0.895687	0.899604	-0.299681	-0.475088	2.52165	3.25203	-1.68781	-1.47576	-1.5912	-0.878027	2.86909	-1.4982	-1.2248
hsa-miR-6844	-1.06412	-0.353899	-2.69033	0.00847885	0.0181387	-3.78626	DOWN	-1.74038	-1.61738	0.627286	-1.57134	-1.67742	-1.2376	-1.55063	-1.52546	1.39509	-0.489484	3.94143	-1.11174	-1.57285	3.71875	-1.4164	0.858297	2.50442	3.74231	-0.362308	4.20456	-1.35138	3.38007	-0.792648	-1.55614	4.26533	-1.02774	-1.50421	-1.64695	2.92925	3.91095	-1.59003	-0.299681	-0.471846	-1.40019	1.46698	-0.848626	-1.47576	-1.5912	-0.878027	-1.39765	1.3183	-1.2248
hsa-miR-6845-3p	1.13654	5.14183	4.7249	8.25086e-06	3.56888e-05	2.75902	UP	3.8011	5.99582	2.73163	4.72275	5.56173	2.68346	5.85299	5.23948	4.10831	4.95344	4.94344	5.81844	4.68036	5.83991	4.76751	3.52029	5.54441	5.33051	5.32587	2.50951	2.85211	5.30085	5.43558	5.57251	6.19291	4.76751	4.42279	4.7694	5.79335	4.47863	1.0534	-0.299681	5.74471	4.77593	5.21426	5.4454	5.53091	3.2562	5.28925	4.32125	4.81749	4.353
hsa-miR-6846-3p	2.61156	2.62146	6.23369	1.36352e-08	9.71507e-08	9.00061	UP	2.14055	0.514275	-1.58516	1.78449	0.645945	-1.2376	3.1657	-1.52546	3.55618	4.53457	-1.30103	4.10831	-1.57285	-1.64433	-1.4164	4.82623	-1.13091	4.34504	3.13725	2.75	5.24823	-1.04535	-0.792648	5.52529	-0.862626	4.36103	-1.50421	2.36929	-1.48952	4.01081	1.93035	-0.299681	4.68812	-1.40019	3.76212	3.78005	2.7889	-1.5912	-0.878027	-1.39765	4.97241	-1.2248
hsa-miR-6846-5p	1.95072	4.69866	5.3782	5.68969e-07	3.0788e-06	5.35326	UP	4.34893	4.7452	5.33492	2.13503	4.91468	5.64952	-1.55063	5.24621	4.44009	3.87505	-1.30103	-1.11174	4.31302	5.69012	4.96005	4.2996	3.37069	-1.02947	6.06074	4.7043	2.92004	-1.04535	5.75434	5.82398	5.4237	5.15436	4.87073	4.57938	3.17799	4.74334	5.46881	-0.299681	5.67074	2.60512	4.75138	5.55147	5.31315	3.12984	4.32125	5.15436	5.15436	-1.2248
hsa-miR-6847-3p	1.6371	0.716636	3.78181	0.000276758	0.000877484	-0.605226	UP	-0.623967	0.833198	-1.58516	-1.57134	-1.67742	-1.2376	4.58526	-1.52546	-1.67249	-1.74038	2.56184	3.46691	-1.57285	0.0284396	-1.4164	-1.62845	-1.13091	-1.02947	-1.68431	-0.917824	-1.35138	-1.04535	-0.792648	-1.55614	-0.862626	-1.02774	-1.50421	4.06599	2.10798	-0.895687	2.44545	-0.299681	3.42758	4.18536	-1.72575	3.17799	-1.47576	5.17936	-0.878027	1.89073	-1.4982	-1.2248
hsa-miR-6847-5p	1.37489	0.595926	3.23492	0.00169157	0.0044429	-2.30586	UP	0.901588	-1.61738	-1.58516	-1.57134	-1.67742	-1.2376	-1.55063	-1.52546	4.18536	-1.74038	-1.30103	-1.11174	-1.57285	1.3677	-1.4164	-1.62845	-1.13091	-1.02947	-0.212121	3.13454	5.07468	4.32516	-0.792648	2.31082	-0.862626	3.07299	-1.50421	2.42502	-1.48952	-0.895687	-1.59003	-0.299681	4.39456	-1.40019	-1.2062	3.96456	-1.47576	-1.5912	-0.878027	-1.39765	3.26026	-1.2248
hsa-miR-6848-3p	2.15066	3.62682	5.90439	5.88746e-08	3.78479e-07	7.56769	UP	4.56421	5.1842	5.01963	2.13149	4.43089	-1.2376	3.66501	5.12992	-0.537538	1.55909	-1.30103	4.83758	4.0822	5.43558	5.19154	2.18501	2.95949	3.63265	3.25203	1.36319	2.21446	4.34136	-0.792648	3.34831	-0.862626	4.54649	3.61829	3.76212	4.18721	-0.895687	0.855753	4.63338	-1.64229	3.09469	5.55147	3.87047	3.74856	4.09043	-0.878027	3.67823	1.48495	-1.2248
hsa-miR-6848-5p	1.22967	7.05406	6.38026	7.0449e-09	5.31476e-08	9.64853	UP	6.68604	7.04703	6.62673	6.82007	7.04703	6.28467	7.08805	6.83223	6.31451	6.40753	6.41637	7.17757	6.22899	6.23286	6.58638	9.72253	5.88482	7.01285	6.44729	5.31518	6.42208	5.51466	7.07141	6.19291	6.4928	7.52593	6.14909	7.01285	6.67492	5.90878	7.23842	-0.299681	5.89963	6.81512	7.15402	6.70667	6.95922	7.21278	5.53677	6.47399	6.60165	7.02346
hsa-miR-6849-3p	2.0436	2.38953	4.93887	3.50333e-06	1.62203e-05	3.58764	UP	2.75292	3.23241	-1.58516	3.42256	3.312	-1.2376	-1.55063	-1.52546	2.0843	-1.74038	3.51548	3.89673	3.94973	-1.64433	3.36826	2.41758	2.73395	3.35929	1.33897	-1.66996	-1.35138	-1.04535	4.74888	-1.55614	-0.862626	3.97823	1.56145	1.98257	-1.48952	-0.895687	2.33874	-0.299681	-0.196703	1.9051	3.63265	3.85838	-1.47576	-1.5912	-0.878027	1.72496	3.13725	2.51198
hsa-miR-6851-3p	1.54661	3.54845	4.3952	2.96511e-05	0.00011647	1.52678	UP	3.19902	4.66785	2.52925	2.11468	4.2812	-1.2376	4.20456	-1.52546	3.21507	2.26218	2.22982	4.53457	4.02768	2.00985	-1.4164	-1.62845	4.42279	4.5814	-0.810121	0.333286	-1.35138	3.95755	4.24053	2.90266	4.75389	-1.02774	-1.50421	2.92004	2.03784	5.49271	1.88351	4.81548	5.01521	3.14779	4.053	4.56165	4.69265	2.94416	4.1047	4.2481	5.18959	4.53865
hsa-miR-6851-5p	1.32775	5.98216	5.88087	6.52806e-08	4.16529e-07	7.46665	UP	5.63388	5.47725	5.54159	5.07235	6.50222	5.17397	3.24649	6.46079	5.88175	6.67492	5.43558	6.23286	5.58468	5.40663	6.21729	5.5196	6.41637	5.50931	5.55667	5.43067	5.95279	3.85204	5.86836	6.11525	3.96456	5.58468	5.75103	5.8372	5.70507	-0.895687	6.27005	-0.299681	5.83114	5.82121	6.04465	5.59536	6.48286	4.37348	6.93345	5.67738	4.864	4.9768
hsa-miR-6852-3p	1.95713	0.886181	4.9403	3.48316e-06	1.61561e-05	3.59323	UP	-1.66685	3.30357	-1.58516	2.32863	3.49273	-1.2376	-1.55063	2.01212	-0.184088	4.33309	-1.30103	-1.11174	-1.57285	-1.64433	-1.4164	-1.62845	-1.13091	-1.02947	2.30638	5.33051	-1.35138	-1.04535	-0.792648	-1.55614	-0.862626	-1.02774	-1.50421	-0.0918462	-1.48952	3.2034	2.3882	4.71235	4.18352	-1.40019	1.95035	0.77011	1.92169	-1.5912	-0.878027	-1.39765	-1.4982	-1.2248
hsa-miR-6852-5p	1.62712	0.74154	4.2807	4.56704e-05	0.000171515	1.11231	UP	-0.402451	-1.61738	-1.58516	-1.57134	1.29599	-1.2376	-1.55063	-1.52546	-0.987264	-1.53441	-1.30103	-1.11174	1.56813	1.22442	-1.4164	-0.168626	-1.13091	-1.02947	1.32944	-1.66996	-1.35138	2.73627	-0.792648	1.24918	-0.862626	-1.02774	-1.50421	4.36103	-1.48952	-0.895687	0.442791	-0.299681	4.50135	-1.40019	1.79145	-1.68781	2.28507	-1.5912	-0.878027	-1.39765	-1.4982	4.62931
hsa-miR-6855-3p	2.0035	1.71671	4.52906	1.77489e-05	7.22635e-05	2.0203	UP	0.342159	-1.61738	1.24444	-1.57134	-1.67742	-1.2376	4.83376	2.07226	-0.946516	-1.74038	2.11879	3.38007	-1.57285	-1.64433	-1.4164	0.159571	-1.13091	2.79604	-0.565374	-0.266813	2.19112	-1.04535	3.72325	-1.55614	-0.862626	4.94938	2.44366	4.85412	-1.48952	-0.895687	4.10071	-0.299681	-1.64229	6.02186	1.95998	3.71535	3.312	4.46426	-0.878027	2.47623	-1.4982	-1.2248
hsa-miR-6855-5p	1.81765	1.62158	3.92711	0.000166074	0.000559028	-0.120449	UP	4.31302	-1.61738	-1.58516	0.685132	4.60699	-1.2376	-1.55063	3.41639	-1.67249	2.5452	-1.30103	3.60573	-1.57285	2.98621	-1.4164	-1.62845	3.88879	-1.02947	-0.372352	2.73627	2.95459	-1.04535	3.89897	2.86909	-0.862626	3.32137	-1.50421	3.15233	-1.48952	-0.895687	2.22623	-0.299681	4.8988	1.92169	1.24264	-1.68781	-1.47576	-1.5912	-0.878027	-1.39765	2.31609	-1.2248
hsa-miR-6857-3p	2.61998	2.03039	7.43478	5.32664e-11	5.66923e-10	14.4569	UP	1.21255	4.19143	-1.58516	0.840209	2.10562	-1.2376	-1.55063	2.67757	0.205945	0.0898956	-1.30103	3.74856	0.833198	1.74834	3.04634	1.65575	-1.13091	-1.02947	-0.500604	-1.66996	-1.35138	-1.04535	-0.792648	2.12419	-0.862626	4.13895	1.69718	-0.417253	-1.48952	-0.895687	0.880984	-0.299681	0.147286	1.67667	3.58272	3.73622	1.91586	1.36522	-0.878027	3.8836	-1.4982	3.49273
hsa-miR-6857-5p	4.34543	3.57196	9.57276	1.82498e-15	3.41684e-14	24.6296	UP	5.13188	3.57992	-1.58516	2.69941	4.90246	-1.2376	2.79957	-1.52546	-1.67249	-1.74038	-1.30103	-1.11174	2.91423	-1.64433	3.4337	-1.62845	4.58526	-1.02947	3.50599	-1.66996	-1.35138	-1.04535	6.16264	-1.55614	-0.862626	4.34136	4.26726	2.01438	4.43565	-0.895687	4.25235	-0.299681	3.08953	4.23434	4.15732	2.40924	3.38938	5.2442	-0.878027	-1.39765	1.80321	-1.2248
hsa-miR-6858-3p	1.03043	4.49167	4.07986	9.58632e-05	0.000335456	0.403092	UP	3.99593	4.94763	4.71637	4.7452	5.23505	3.83486	4.35881	4.88078	5.53677	5.5875	4.23025	4.88556	4.2481	5.10547	3.70231	4.87703	5.27545	5.19915	4.00015	0.726429	5.03182	-1.04535	4.04535	0.989956	-0.862626	3.91276	4.64432	4.39029	4.25675	-0.895687	5.37645	5.76473	4.44009	3.96854	5.1029	4.89462	3.77797	3.48763	5.38104	2.44545	3.9271	3.49786
hsa-miR-6859-3p	1.54068	4.78992	5.85	7.47389e-08	4.69866e-07	7.33431	UP	4.89671	5.90878	1.35786	4.92427	5.4162	4.06097	3.72325	4.0589	2.26453	4.97241	2.56184	3.98714	3.94568	2.99526	3.86085	2.67757	3.12784	4.7043	3.77797	0.0591429	2.17334	6.28467	-0.792648	3.38938	5.69608	-1.02774	4.79703	5.16924	4.91247	5.57251	3.51322	4.84556	5.8104	4.94763	4.9768	5.31315	4.49146	4.85873	4.48491	3.79351	4.80738	5.66429
hsa-miR-6860	1.84439	4.70619	5.1523	1.46248e-06	7.31241e-06	4.43508	UP	4.29757	4.65402	5.47125	1.48495	6.78738	2.30168	0.750126	5.40174	5.38104	4.74888	3.39914	-1.11174	4.65205	-0.654132	4.61865	5.28542	3.10677	4.66563	5.56967	7.00315	6.36559	4.11216	5.37645	6.07618	5.68048	-1.02774	4.9746	4.87073	4.80317	-0.895687	4.02768	-0.299681	4.98533	2.6184	5.11943	5.26281	6.07618	2.79251	-0.878027	4.86136	5.32587	-1.2248
hsa-miR-6861-3p	2.97052	3.64548	7.44831	4.99689e-11	5.34043e-10	14.5199	UP	4.4536	2.85211	-1.58516	3.20803	4.70207	4.58954	-1.55063	-1.52546	2.11468	-1.15078	3.74453	3.96285	2.08704	5.48835	-1.4164	-0.025489	3.52274	-1.02947	4.68812	1.09566	-1.35138	-1.04535	-0.792648	5.45838	5.33938	-1.02774	3.41444	4.26533	2.48315	3.48321	-1.59003	-0.299681	4.87703	3.65096	4.75138	4.41566	3.32364	0.764319	-0.878027	-1.39765	4.88078	3.46258
hsa-miR-6862-3p	2.00784	4.1861	5.53901	2.87251e-07	1.66696e-06	6.01934	UP	4.42716	4.57232	4.35658	0.972352	4.82203	-1.2376	-1.55063	4.20209	3.39475	5.69608	3.71535	4.80959	2.95053	1.09846	4.9814	5.5196	4.13895	5.35273	5.34827	4.06097	5.16924	-1.04535	5.01102	5.62874	4.63807	-1.02774	2.21446	0.370538	4.66785	-0.895687	1.59596	-0.299681	4.96342	4.66785	4.74147	4.98921	3.74453	2.76771	-0.878027	3.14271	5.07916	2.7853
hsa-miR-6862-5p	1.1011	1.32326	2.66239	0.00915953	0.0193687	-3.85603	UP	3.3567	0.685132	2.53962	2.18807	0.571407	-1.2376	1.50826	-1.52546	-1.67249	4.04715	-1.30103	-1.11174	1.6949	-1.64433	-1.4164	0.250549	-1.13091	-1.02947	2.00532	2.36484	4.22029	-1.04535	-0.792648	-1.55614	3.75333	3.71875	2.32055	0.871286	-1.48952	-0.895687	-1.59003	-0.299681	-0.0854286	-1.40019	3.20988	2.99751	2.18501	-1.5912	3.40469	-1.39765	5.26281	-1.2248
hsa-miR-6863	-1.71765	0.485206	-3.95727	0.000149152	0.000504716	-0.0182114	DOWN	3.15406	-1.61738	2.04778	-1.57134	1.50314	3.39914	5.3624	1.92615	1.16557	-0.27733	3.32885	2.72434	1.35786	1.87897	2.23589	-1.62845	4.40821	-1.02947	-0.0295495	3.80714	-1.35138	-1.04535	-0.792648	-1.55614	-0.862626	-1.02774	4.01724	-1.64695	-1.48952	-0.895687	4.73251	-0.299681	2.34397	2.32055	4.06097	-0.943396	-1.47576	5.59839	4.13305	6.13509	-1.4982	-1.2248
hsa-miR-6866-3p	1.21484	0.789217	2.8326	0.00567378	0.012811	-3.42135	UP	1.22721	-1.61738	3.62518	2.84316	-1.67742	-1.2376	1.23001	-1.52546	-1.67249	2.58603	3.88879	-1.11174	-1.57285	0.862088	3.89259	1.66168	-1.13091	-1.02947	-1.68431	3.21841	4.47346	-1.04535	-0.792648	-1.55614	-0.862626	-1.02774	2.20617	-1.64695	-1.48952	-0.895687	1.66168	4.50135	-1.64229	4.53865	0.810659	-1.68781	2.92004	1.18008	-0.878027	1.81624	-1.4982	-1.2248
hsa-miR-6867-3p	1.86675	3.71238	5.23661	1.03052e-06	5.28657e-06	4.77528	UP	2.42502	4.93941	3.66501	4.21021	1.53657	-1.2376	1.77833	2.89663	3.90348	4.04715	4.85412	-1.11174	3.09469	3.30163	1.63493	2.58603	4.19143	4.20646	4.79703	4.52151	3.53471	5.26743	-0.792648	4.30914	-0.862626	-1.02774	4.68812	2.28754	-1.48952	4.42279	1.2017	4.57736	1.9051	3.37599	4.18721	1.80034	3.65654	0.370538	-0.878027	4.80516	4.12681	5.61821
hsa-miR-6867-5p	2.65427	0.936641	6.27453	1.13497e-08	8.22374e-08	9.18056	UP	-0.335374	-1.61738	-1.58516	-1.57134	-1.67742	-1.2376	-1.55063	-1.52546	-1.67249	2.82168	3.77377	-1.11174	-1.57285	-0.445286	-1.4164	-1.62845	-1.13091	-1.02947	-0.569473	5.51713	6.51142	-1.04535	-0.792648	-1.55614	-0.862626	-1.02774	1.89469	0.685132	-1.48952	-0.895687	0.378418	5.10547	-1.64229	1.97449	-0.786615	4.04895	-1.47576	-1.5912	-0.878027	-1.39765	-1.4982	-1.2248
hsa-miR-6868-3p	2.29271	1.34639	5.14459	1.50983e-06	7.50528e-06	4.40413	UP	1.04963	-1.61738	-1.58516	4.57938	2.99975	-1.2376	-1.55063	-1.52546	0.0747747	3.78465	2.98397	3.30163	-1.57285	4.83758	1.75577	0.145632	-1.13091	-1.02947	0.353681	5.5068	4.39242	-1.04535	-0.792648	-1.55614	-0.862626	-1.02774	-1.50421	1.29599	-1.48952	-0.895687	-1.59003	5.60142	-1.64229	-1.40019	-0.516484	2.11468	-1.47576	-1.5912	-0.878027	-1.39765	-1.4982	2.73395
hsa-miR-6870-3p	1.89678	3.14181	4.84504	5.11314e-06	2.31309e-05	3.22158	UP	2.18501	3.84957	-1.58516	2.66055	2.14205	2.85211	1.51622	4.18721	0.246505	0.992874	3.14779	-1.11174	0.707022	1.58354	3.77166	5.046	4.62931	-1.02947	-0.786615	2.05274	4.71637	3.8011	-0.792648	5.24621	4.49146	4.20836	-1.50421	0.175527	-1.48952	5.01102	0.318516	5.8104	5.00178	-1.40019	3.80303	4.38655	2.64662	-1.5912	3.82644	2.89996	3.67007	-1.2248
hsa-miR-6870-5p	1.45921	6.92453	10.1667	1.03099e-16	2.36116e-15	27.4792	UP	5.84262	6.15647	6.32925	5.0237	6.58638	4.06599	4.26919	6.59696	5.79335	6.20973	6.20085	6.70667	6.50222	6.0153	5.87819	5.49053	6.67492	6.13154	5.78281	4.94344	5.97295	7.20242	5.80519	7.54841	7.93879	5.90878	5.78769	6.02186	6.80151	6.69642	6.73938	7.5137	7.34266	7.10702	6.81018	5.90878	5.92464	4.61148	5.85651	6.21729	7.22535	7.22535
[truncated: 108 more rows]
[truncated: 49 more columns]
